# Supplementary material for: Identifying General Tumor and Specific Lung Cancer Biomarkers by Transcriptomic Analysis
Source: Biology (Basel). 2022 Jul 20;11(7):1082. doi: 10.3390/biology11071082 (PMC9313083; doi:10.3390/biology11071082)
Supplement: Supplementary file 1 [file biology-11-01082-s001.zip]

Archive with 5 entries (5 files):
- SP1 Common genes LC_OC.xlsx
- SP2 Unique genes LC_OC.xlsx
- SP3 LC_OC.pdf
- SP4 LCII.pdf
- SP5 CCPs LC_OC.xlsx
