# Supplementary material for: Identifying General Tumor and Specific Lung Cancer Biomarkers by Transcriptomic Analysis
Source: Biology (Basel). 2022 Jul 20;11(7):1082. doi: 10.3390/biology11071082 (PMC9313083; doi:10.3390/biology11071082)
Supplement: Supplementary file 1 [file biology-11-01082-s001.zip › SP1 Common genes LC_OC.xlsx]

## Sheet: LC&OC DEGs
	GSE19804		GSE108055		E-MTAB-5231		E-MTAB-3950		GSE10072		GSE3268		GSE52248.		GSE70089.		GSE81089.		GSE84776.		GSE10797		GSE21422		GSE26910		GSE27562	GSE3744		GSE5764		GSE22529		GSE26725		GSE5788		GSE6691		GSE9476
GENE	DOWN	UP	DOWN	UP	DOWN	UP	DOWN	UP	DOWN	UP	DOWN	UP	DOWN	UP	DOWN	UP	DOWN	UP	DOWN	UP	DOWN	UP	DOWN	UP	DOWN	UP	UP	DOWN	UP	DOWN	UP	DOWN	UP	DOWN	UP	DOWN	UP	DOWN	UP	DOWN	UP	LC	BC	LK	OC	TOTAL
ZBTB16	1		1		1		1		1		1				1		1		1		1		1		1			1				1						1		1		9	4	3	7	16
EGR1	1		1		1		1		1		1						1				1		1		1			1				1		1				1				7	4	3	7	14
IQSEC1	1		1		1		1		1		1						1						1					1				1		1		1		1		1		7	2	5	7	14
CFD	1		1		1		1		1		1						1		1				1		1			1				1						1			1	8	3	3	6	14
SYNM	1				1				1		1		1		1		1		1		1		1		1			1		1								1				8	5	1	6	14
CX3CR1	1		1		1				1		1						1		1		1		1					1				1				1		1				7	3	3	6	13
NEDD9	1		1		1				1		1				1		1						1					1				1		1		1		1				7	2	4	6	13
RGL1	1		1		1		1		1		1						1				1		1		1			1										1			1	7	4	2	6	13
TGFBR2	1		1		1				1		1				1		1				1		1					1								1			1	1		7	3	3	6	13
TGFBR3	1		1		1				1				1				1		1				1		1			1								1			1	1		7	3	3	6	13
ABLIM1	1		1		1				1		1						1						1		1			1								1			1	1		6	3	3	6	12
ISCU	1		1		1				1		1												1					1					1			1			1	1		5	2	4	6	11
BHLHE41	1				1				1		1										1		1					1				1		1				1				4	3	3	6	10
CCDC28A	1				1				1		1												1					1				1				1			1	1		4	2	4	6	10
EZH1	1				1				1		1												1		1			1					1						1	1		4	3	3	6	10
GSN	1		1		1				1												1		1		1			1				1									1	4	4	2	6	10
RARRES3			1		1		1				1													1				1				1				1		1		1		4	2	4	6	10
ARID5B	1				1				1														1					1					1			1			1	1		3	2	4	6	9
HBP1	1				1				1														1					1				1				1			1	1		3	2	4	6	9
MARF1					1				1		1												1					1					1			1			1	1		3	2	4	6	9
NCOA1	1				1				1														1		1			1		1									1	1		3	4	2	6	9
PIK3C2B	1								1		1												1		1			1				1		1				1				3	3	3	6	9
SCN3A	1			1							1												1		1			1				1		1				1				3	3	3	6	9
SLC16A6	1		1						1															1				1					1			1			1	1		3	2	4	6	9
APOD					1		1														1		1					1					1						1		1	2	3	3	6	8
ENPP2	1								1												1		1		1			1					1						1			2	4	2	6	8
FN1	1							1														1		1		1			1		1							1				2	5	1	6	8
GNPTAB			1						1															1		1			1				1						1		1	2	3	3	6	8
PDCD4					1				1														1					1					1			1			1	1		2	2	4	6	8
SCML1	1								1														1					1				1				1		1		1		2	2	4	6	8
TM2D3	1			1																			1					1					1			1			1	1		2	2	4	6	8
ACTG2	1		1		1		1		1		1				1		1		1		1		1					1		1											1	9	4	1	5	14
CORO2B	1				1		1		1		1		1		1		1		1				1					1				1		1				1				9	2	3	5	14
DUSP1	1		1		1		1		1		1		1				1		1		1				1			1				1								1		9	3	2	5	14
HBB	1		1		1		1		1		1		1		1		1						1					1				1					1			1		9	2	3	5	14
ITM2A	1		1		1		1		1		1		1				1		1		1		1		1			1								1						9	4	1	5	14
KLF4	1		1		1		1		1		1		1		1		1				1		1		1			1				1										9	4	1	5	14
TAL1	1		1		1				1		1		1		1		1		1				1		1			1										1		1		9	3	2	5	14
CAV1	1		1		1				1		1		1		1		1				1		1		1			1										1				8	4	1	5	13
CXCL12	1		1		1		1		1		1						1		1				1		1			1										1		1		8	3	2	5	13
ENO2		1		1		1		1		1		1						1		1				1									1			1			1	1		8	1	4	5	13
GNG11	1		1		1		1		1		1		1				1						1		1			1								1				1		8	3	2	5	13
PTGER4	1		1		1		1		1		1				1		1						1		1			1				1							1			8	3	2	5	13
SELENBP1	1		1		1		1		1		1				1		1						1		1			1										1		1		8	3	2	5	13
ABCA6	1		1		1		1		1		1						1						1		1			1					1						1			7	3	2	5	12
ABLIM3	1				1				1		1		1		1		1						1		1			1										1		1		7	3	2	5	12
ALDOC		1		1		1		1		1		1						1					1					1				1						1		1		7	2	3	5	12
CBX7	1				1				1		1				1		1		1				1					1					1						1	1		7	2	3	5	12
CRBN	1		1		1		1		1		1						1						1					1					1			1			1			7	2	3	5	12
FAM189A2	1				1				1		1				1		1		1		1		1		1			1										1				7	4	1	5	12
FOS	1		1		1		1		1		1						1				1		1					1				1						1				7	3	2	5	12
FOSB	1		1		1		1		1		1						1				1		1		1			1										1				7	4	1	5	12
GRK5	1		1		1				1		1		1				1						1		1			1				1						1				7	3	2	5	12
HEG1	1		1		1				1		1		1				1						1					1								1		1		1		7	2	3	5	12
MAN1C1	1				1		1		1		1						1		1				1		1			1								1				1		7	3	2	5	12
METTL7A	1				1		1		1		1						1		1				1		1			1					1						1			7	3	2	5	12
MME	1		1		1				1		1		1		1						1		1					1										1		1		7	3	2	5	12
PRDX4		1				1		1		1		1		1				1						1		1			1			1						1				7	3	2	5	12
STOM	1		1		1				1		1				1		1								1			1				1				1				1		7	2	3	5	12
ZFP36	1		1		1		1		1		1						1				1		1		1			1				1										7	4	1	5	12
JUN	1				1		1		1		1						1				1				1			1				1						1				6	3	2	5	11
ARHGEF3	1		1		1				1		1						1											1					1			1			1	1		6	1	4	5	11
CD59	1		1		1		1		1								1				1		1					1								1				1		6	3	2	5	11
CDKN2A		1		1		1				1								1		1						1			1				1					1			1	6	2	3	5	11
CHPT1	1		1		1				1		1						1				1		1					1				1								1		6	3	2	5	11
CREBL2	1			1	1				1		1						1						1					1					1						1	1		6	2	3	5	11
CRTAP	1		1		1			1	1								1						1					1				1						1			1	6	2	3	5	11
EPB41L2	1		1		1				1		1						1						1					1				1		1				1				6	2	3	5	11
ETS2	1				1		1		1		1						1						1		1			1				1						1				6	3	2	5	11
GFOD1	1		1		1				1				1				1						1		1								1						1	1		6	2	3	5	11
LEF1		1				1		1		1		1						1						1		1							1						1	1		6	2	3	5	11
LGALS3			1		1		1		1		1						1						1		1			1				1						1				6	3	2	5	11
MEST		1		1		1				1								1		1	1		1					1					1				1					6	3	2	5	11
MPDZ	1				1		1		1		1						1						1		1			1										1		1		6	3	2	5	11
NEK3	1		1		1		1		1		1												1					1					1		1				1			6	2	3	5	11
PER1	1		1		1		1		1		1										1		1					1				1						1				6	3	2	5	11
PSMA7		1	1			1		1		1										1				1					1			1							1		1	6	2	3	5	11
RGS2	1		1		1				1		1						1				1							1				1						1		1		6	2	3	5	11
SNRK	1		1		1				1		1						1						1		1			1				1								1		6	3	2	5	11
SPRY1	1				1		1		1		1						1				1		1		1			1										1				6	4	1	5	11
SPRY2	1		1		1		1		1								1				1		1		1			1											1			6	4	1	5	11
TMPO				1		1		1		1		1						1						1		1			1							1			1			6	3	2	5	11
AKAP11	1			1	1				1		1												1					1					1			1			1			5	2	3	5	10
ATXN1	1		1		1			1	1																			1					1			1			1	1		5	1	4	5	10
FAM129A	1		1		1				1		1												1					1				1				1		1				5	2	3	5	10
MKL2	1			1	1		1		1																1			1					1						1	1		5	2	3	5	10
PCM1	1				1		1		1		1												1					1					1			1			1			5	2	3	5	10
RRAGA	1			1	1				1		1												1					1								1			1	1		5	2	3	5	10
RSBN1	1			1	1				1		1												1					1								1			1	1		5	2	3	5	10
SLC25A32	1			1		1		1		1														1					1			1							1		1	5	2	3	5	10
STXBP1	1			1	1				1		1												1		1			1										1		1		5	3	2	5	10
TSPAN13	1		1		1				1		1													1								1		1				1		1		5	1	4	5	10
TUBGCP5		1		1		1		1		1													1					1					1			1			1			5	2	3	5	10
TXNIP	1		1		1				1		1												1		1			1				1								1		5	3	2	5	10
ABCA5				1	1		1		1												1		1		1			1											1			4	4	1	5	9
ABCB1	1				1		1		1														1					1								1			1	1		4	2	3	5	9
AKR1C1	1					1		1				1											1		1			1										1		1		4	3	2	5	9
ARPC5L		1				1		1		1														1					1			1				1					1	4	2	3	5	9
CEP68	1			1	1				1														1		1			1								1			1			4	3	2	5	9
CRTC3	1				1			1	1														1					1				1		1						1		4	2	3	5	9
CSGALNACT1	1				1				1		1																	1				1		1				1		1		4	1	4	5	9
DNAJC2		1				1		1		1														1					1							1			1		1	4	2	3	5	9
DPP8	1				1			1	1														1					1								1			1	1		4	2	3	5	9
DPYD			1				1		1		1										1		1					1				1								1		4	3	2	5	9
E2F5		1		1		1				1														1					1				1						1	1		4	2	3	5	9
EFCAB14	1				1				1		1												1					1					1						1	1		4	2	3	5	9
EIF1B	1				1				1		1												1		1			1				1							1			4	3	2	5	9
EML4		1				1		1		1														1					1							1		1		1		4	2	3	5	9
ENOSF1		1	1				1		1																1			1								1		1		1		4	2	3	5	9
GSAP	1				1				1		1													1				1								1			1	1		4	2	3	5	9
KANK1	1				1				1		1										1		1					1					1							1		4	3	2	5	9
MARC2	1				1				1		1												1					1						1				1			1	4	2	3	5	9
MICB			1			1				1	1													1					1			1							1	1		4	2	3	5	9
MPHOSPH8	1				1				1		1												1					1								1			1	1		4	2	3	5	9
MRC1	1				1				1		1												1		1			1											1		1	4	3	2	5	9
MYLK	1		1		1				1												1		1					1		1										1		4	4	1	5	9
N4BP2L2	1				1				1		1												1					1					1			1			1			4	2	3	5	9
NFATC1	1		1		1				1														1					1					1						1	1		4	2	3	5	9
NUAK2		1		1		1				1														1					1				1						1	1		4	2	3	5	9
PNRC2	1				1				1		1												1					1					1			1			1			4	2	3	5	9
PURA	1				1				1		1												1					1					1						1	1		4	2	3	5	9
SFPQ				1		1		1		1														1	1											1			1		1	4	2	3	5	9
SFXN3			1		1		1		1														1										1			1			1		1	4	1	4	5	9
SLCO3A1	1		1					1	1														1		1			1				1						1				4	3	2	5	9
STAG1	1			1				1	1														1					1					1						1	1		4	2	3	5	9
STAT1			1			1		1		1														1		1			1										1	1		4	3	2	5	9
TLE4	1		1						1		1										1		1					1					1						1			4	3	2	5	9
WASF2	1		1					1	1														1					1		1			1						1			4	3	2	5	9
WSB1	1		1						1		1												1		1											1			1	1		4	2	3	5	9
WWP2	1				1				1		1												1					1				1							1	1		4	2	3	5	9
ZNF394	1		1						1		1												1					1				1				1			1			4	2	3	5	9
BCL2	1			1					1														1					1					1			1			1			3	2	3	5	8
CAMLG				1	1				1														1					1				1				1			1			3	2	3	5	8
CHST2				1		1						1									1		1										1						1	1		3	2	3	5	8
DCP2			1						1		1												1					1					1						1	1		3	2	3	5	8
DUSP5			1				1			1														1				1				1				1		1				3	2	3	5	8
ERCC5			1						1		1												1					1								1			1	1		3	2	3	5	8
FAM117A				1	1				1												1							1					1						1	1		3	2	3	5	8
FAM46A					1				1		1												1		1			1											1		1	3	3	2	5	8
GALNT6		1					1			1														1				1				1					1	1				3	2	3	5	8
GATM		1			1					1													1					1					1						1	1		3	2	3	5	8
HBA1	1								1		1												1					1				1					1			1		3	2	3	5	8
HOPX	1								1		1													1								1				1		1		1		3	1	4	5	8
IL21R		1				1				1														1		1			1										1	1		3	3	2	5	8
KRT14		1								1		1									1		1		1			1		1												3	5	0	5	8
LONP2		1				1			1														1		1			1								1			1			3	3	2	5	8
MAST3	1				1				1														1					1				1							1	1		3	2	3	5	8
MEF2D	1			1	1																			1				1				1						1			1	3	2	3	5	8
PDGFD		1		1						1													1					1					1			1			1			3	2	3	5	8
PLEKHA1	1							1	1														1						1			1				1				1		3	2	3	5	8
PNISR					1				1		1												1		1			1								1			1			3	3	2	5	8
RAPGEF3	1		1		1																		1		1			1					1						1			3	3	2	5	8
RBM39	1			1	1																				1			1								1			1		1	3	2	3	5	8
RETREG3		1				1				1													1					1					1						1	1		3	2	3	5	8
RPS27L			1		1				1														1					1					1			1					1	3	2	3	5	8
SETBP1	1				1				1														1					1					1						1	1		3	2	3	5	8
SLC17A9		1				1				1																			1			1					1	1			1	3	1	4	5	8
SRSF5	1				1				1														1		1			1								1			1			3	3	2	5	8
TAGLN2		1	1					1																1					1			1						1			1	3	2	3	5	8
TAP1			1			1		1																1					1			1				1				1		3	2	3	5	8
TCF4	1				1				1														1					1					1						1	1		3	2	3	5	8
TESC		1								1	1												1					1					1						1		1	3	2	3	5	8
TMEM243					1				1		1												1					1								1			1	1		3	2	3	5	8
UBE4A		1		1							1												1					1								1			1	1		3	2	3	5	8
UBR2	1								1		1												1		1			1											1	1		3	3	2	5	8
VPS37B	1		1						1																			1				1		1				1		1		3	1	4	5	8
ACTA2					1				1												1		1					1				1									1	2	3	2	5	7
BCL10						1				1														1					1			1							1	1		2	2	3	5	7
CCR7			1							1														1					1				1						1	1		2	2	3	5	7
CDC14B							1		1														1					1					1						1	1		2	2	3	5	7
DDB2		1							1														1					1					1			1			1			2	2	3	5	7
DYNLT1		1								1														1								1				1			1	1		2	1	4	5	7
FMOD					1				1														1					1					1		1				1			2	2	3	5	7
GOLGA8N	1								1														1					1								1			1		1	2	2	3	5	7
IVNS1ABP		1				1																		1					1			1						1		1		2	2	3	5	7
KMT2A					1				1														1					1								1			1	1		2	2	3	5	7
MYC	1		1																						1			1				1						1		1		2	2	3	5	7
P2RX5				1		1																							1			1		1				1		1		2	1	4	5	7
PDE9A		1								1											1		1		1			1								1						2	4	1	5	7
PGGHG		1								1																		1					1				1		1	1		2	1	4	5	7
RGS1			1							1											1			1					1							1		1				2	3	2	5	7
SAMD9	1							1																1					1				1			1				1		2	2	3	5	7
SUSD6	1								1															1				1				1				1			1			2	2	3	5	7
VOPP1		1								1														1					1				1						1	1		2	2	3	5	7
ZBTB38	1								1														1					1					1			1			1			2	2	3	5	7
ZNF266	1								1														1		1								1						1	1		2	2	3	5	7
AMY1A		1																					1		1			1					1						1			1	3	2	5	6
CTR9				1																			1					1								1			1	1		1	2	3	5	6
DNMBP		1																					1		1			1					1						1			1	3	2	5	6
DUSP2	1																							1				1								1			1	1		1	2	3	5	6
ELOVL5						1																	1					1					1						1	1		1	2	3	5	6
HIVEP2	1																						1					1					1						1	1		1	2	3	5	6
LMBR1L			1																				1		1			1					1						1			1	3	2	5	6
NBR1					1																		1					1					1						1	1		1	2	3	5	6
RHEX	1																						1						1				1						1		1	1	2	3	5	6
SAV1			1																				1					1				1				1				1		1	2	3	5	6
SNRNP35									1														1					1					1			1			1			1	2	3	5	6
SOX10		1																			1		1					1		1								1				1	4	1	5	6
SUN1		1																					1		1								1						1	1		1	2	3	5	6
ARHGAP5																							1					1					1						1	1		0	2	3	5	5
JCHAIN																					1							1				1		1				1				0	2	3	5	5
MAP3K5																							1										1			1			1	1		0	1	4	5	5
NEIL1																									1			1				1		1				1				0	2	3	5	5
PIGB																							1					1								1			1	1		0	2	3	5	5
RAB5IF																								1		1			1			1									1	0	3	2	5	5
ACACB	1		1		1		1		1		1		1		1		1		1				1		1			1												1		10	3	1	4	14
BIRC5		1		1		1		1		1		1		1		1		1		1				1					1								1	1				10	2	2	4	14
FHL1	1		1		1		1		1		1		1		1		1		1				1		1			1								1						10	3	1	4	14
COL10A1		1		1		1		1		1		1		1		1		1				1		1		1			1													9	4	0	4	13
F8	1		1		1		1		1		1		1		1		1						1					1					1								1	9	2	2	4	13
FZD4	1		1		1		1		1		1		1				1		1				1		1			1										1				9	3	1	4	13
LYVE1	1		1		1		1		1		1				1		1		1				1		1			1										1				9	3	1	4	13
MCM4		1		1		1		1		1		1		1				1		1				1					1								1	1				9	2	2	4	13
MMP11		1		1		1		1		1		1		1				1		1				1		1			1				1									9	3	1	4	13
SDC1		1	1			1		1		1		1		1				1		1				1		1			1									1				9	3	1	4	13
TCEAL2	1			1	1		1		1		1		1				1		1				1					1								1				1		9	2	2	4	13
ADRB2	1		1		1		1		1		1		1				1						1					1								1			1			8	2	2	4	12
AOX1	1		1		1		1		1		1						1		1				1		1			1										1				8	3	1	4	12
ASF1B		1		1		1		1		1		1						1		1				1					1								1			1		8	2	2	4	12
C1orf115	1		1		1			1	1		1		1				1						1		1			1										1				8	3	1	4	12
CD36	1		1		1				1		1		1		1		1						1		1			1				1										8	3	1	4	12
CKAP4		1		1		1		1		1		1						1		1				1					1				1							1		8	2	2	4	12
COL11A1		1		1		1		1		1		1				1		1				1		1		1			1													8	4	0	4	12
EIF2AK1		1		1		1		1		1		1		1				1						1					1										1	1		8	2	2	4	12
GIMAP6	1		1		1		1		1		1		1				1						1					1								1				1		8	2	2	4	12
GPRASP1	1			1	1		1		1		1						1		1				1					1											1	1		8	2	2	4	12
GYPC	1		1		1				1		1		1		1		1						1					1				1								1		8	2	2	4	12
HLF	1				1		1		1		1				1		1		1		1		1					1												1		8	3	1	4	12
IL33	1		1		1				1		1		1				1		1				1		1			1											1			8	3	1	4	12
LMO2	1				1		1		1		1		1				1		1				1					1				1						1				8	2	2	4	12
MCM2		1		1		1		1		1		1						1		1				1					1								1		1			8	2	2	4	12
MMRN2	1		1		1				1		1		1		1		1						1		1			1													1	8	3	1	4	12
NME4		1		1		1		1		1		1						1		1				1					1			1						1				8	2	2	4	12
PCNA		1		1		1		1		1		1						1		1				1		1			1										1			8	3	1	4	12
PDIA6		1		1		1		1		1		1						1		1				1					1			1						1				8	2	2	4	12
PIK3R1	1		1		1		1		1				1		1		1				1		1					1								1						8	3	1	4	12
PRC1		1		1		1		1		1		1						1		1				1					1				1						1			8	2	2	4	12
SELP	1		1		1		1		1		1				1		1						1					1					1						1			8	2	2	4	12
SMARCB1		1		1		1		1		1		1						1		1				1									1						1		1	8	1	3	4	12
SULF1		1		1		1		1		1		1				1		1				1		1		1			1													8	4	0	4	12
TIMELESS		1		1		1		1		1		1						1		1				1					1				1						1			8	2	2	4	12
TNXB	1						1		1		1		1		1		1		1				1		1			1										1				8	3	1	4	12
VIPR1	1		1		1		1		1		1		1				1						1		1			1					1									8	3	1	4	12
ADARB1	1		1		1				1		1		1				1						1					1				1								1		7	2	2	4	11
ALDH2	1		1		1		1		1		1						1						1									1						1		1		7	1	3	4	11
C11orf80		1		1		1		1		1		1						1						1									1			1			1			7	1	3	4	11
C6	1		1		1		1		1				1						1				1					1									1	1				7	2	2	4	11
CASK		1		1		1		1		1		1						1						1					1				1						1			7	2	2	4	11
CAT	1		1		1				1		1				1		1						1		1			1				1										7	3	1	4	11
CCDC69	1		1		1		1		1		1						1						1					1											1	1		7	2	2	4	11
CD52	1		1		1				1		1				1		1							1												1			1	1		7	1	3	4	11
CD83	1		1		1				1		1				1		1							1					1			1							1			7	2	2	4	11
CD93	1		1		1				1		1		1				1						1					1				1						1				7	2	2	4	11
CDC7		1		1		1		1		1								1		1				1					1										1	1		7	2	2	4	11
CTDSPL	1		1		1		1		1		1						1				1							1										1		1		7	2	2	4	11
CXCL2	1		1		1		1		1		1						1				1		1		1			1														7	4	0	4	11
DGUOK		1		1		1		1		1		1		1										1								1							1	1		7	1	3	4	11
DOPEY1		1		1	1		1		1		1								1				1					1								1			1			7	2	2	4	11
EDN1	1		1		1				1		1		1				1				1		1		1			1														7	4	0	4	11
EDNRB	1		1		1				1		1		1				1						1		1			1											1			7	3	1	4	11
ESRP1		1				1		1		1		1		1				1						1					1								1	1				7	2	2	4	11
FCER1A	1		1		1				1		1						1		1		1		1					1												1		7	3	1	4	11
FYCO1	1		1		1		1		1		1						1						1					1											1	1		7	2	2	4	11
GAS7	1		1		1		1		1		1						1						1					1				1									1	7	2	2	4	11
GFPT1		1		1		1				1		1		1				1						1					1									1			1	7	2	2	4	11
GIMAP5	1		1		1		1		1		1						1						1					1										1		1		7	2	2	4	11
GOLT1B		1		1		1		1		1		1						1						1					1							1		1				7	2	2	4	11
H1F0		1				1		1		1		1						1		1				1				1									1	1				7	2	2	4	11
KNTC1		1		1		1		1		1		1						1						1					1				1						1			7	2	2	4	11
MMP9		1				1				1		1				1		1		1				1		1			1											1		7	3	1	4	11
NDRG2	1		1		1				1				1				1		1		1		1		1			1														7	4	0	4	11
NR3C2	1				1		1		1		1						1		1				1					1								1				1		7	2	2	4	11
NR4A1	1				1		1		1		1						1		1		1							1				1						1				7	2	2	4	11
NTRK2	1		1					1	1			1	1		1						1		1					1													1	7	3	1	4	11
PHACTR2	1		1		1				1		1		1				1						1										1			1			1			7	1	3	4	11
PLAGL1	1		1		1			1	1		1						1						1		1			1											1			7	3	1	4	11
PLSCR4	1		1		1		1		1		1						1				1		1					1												1		7	3	1	4	11
PPIF		1				1		1		1		1						1		1				1		1						1						1				7	2	2	4	11
PTDSS1		1	1			1		1		1		1								1				1								1							1		1	7	1	3	4	11
RGCC	1				1				1		1		1		1		1				1		1					1					1									7	3	1	4	11
RIT1		1	1			1		1		1		1						1						1					1							1			1			7	2	2	4	11
S100A4	1		1		1				1		1		1				1						1					1								1			1			7	2	2	4	11
SEC61A1		1		1		1		1		1		1						1						1				1				1									1	7	2	2	4	11
SESN1	1				1		1		1		1				1		1						1		1			1				1										7	3	1	4	11
SLIT2	1		1		1				1		1		1				1						1		1			1										1				7	3	1	4	11
SOBP	1			1	1				1		1						1		1				1					1					1						1			7	2	2	4	11
SORBS3	1		1		1		1		1		1						1						1					1										1			1	7	2	2	4	11
SVEP1	1				1				1		1		1				1		1				1		1			1										1				7	3	1	4	11
SYNE1	1				1		1		1		1				1		1						1					1								1				1		7	2	2	4	11
TACC3		1				1		1		1		1						1		1				1					1										1	1		7	2	2	4	11
TPD52		1		1		1		1		1		1						1						1								1						1		1		7	1	3	4	11
TUBA4A		1				1		1		1		1						1		1				1								1							1	1		7	1	3	4	11
YKT6		1				1		1		1		1						1		1									1			1				1			1			7	1	3	4	11
ABR				1	1		1		1		1						1						1					1					1						1			6	2	2	4	10
ABCG2	1				1				1		1				1		1						1					1										1		1		6	2	2	4	10
ACKR1	1				1				1		1				1		1						1		1			1												1		6	3	1	4	10
ADAMDEC1		1				1				1		1		1				1						1					1										1		1	6	2	2	4	10
ADTRP	1				1				1		1				1		1																1		1				1		1	6	0	4	4	10
AHNAK	1		1		1				1		1						1						1					1					1						1			6	2	2	4	10
AKAP12	1		1		1				1		1		1										1					1					1						1			6	2	2	4	10
ANGPTL4			1			1				1						1		1		1			1		1			1										1				6	3	1	4	10
ANKS1A	1		1		1				1		1						1						1		1			1											1			6	3	1	4	10
ANXA1	1		1		1				1				1		1						1		1					1				1										6	3	1	4	10
ANXA11	1		1		1		1		1		1												1					1					1						1			6	2	2	4	10
ARGLU1	1				1		1		1				1				1						1		1			1											1			6	3	1	4	10
ARHGAP25	1		1						1		1		1				1																1			1			1	1		6	0	4	4	10
ARL4C						1		1		1		1						1		1	1							1								1			1			6	2	2	4	10
ARRB1	1		1		1				1		1						1						1					1								1		1				6	2	2	4	10
AUH	1			1	1		1		1		1												1		1			1												1		6	3	1	4	10
B4GALT3		1		1		1		1		1								1						1					1				1						1			6	2	2	4	10
CD302	1		1						1		1				1		1						1					1				1						1				6	2	2	4	10
CST3			1		1		1		1		1						1						1					1				1						1				6	2	2	4	10
DDX39A		1				1				1		1						1		1				1					1			1							1			6	2	2	4	10
DENND4C	1		1		1				1		1						1						1					1											1	1		6	2	2	4	10
DGKA		1				1		1		1		1						1										1					1						1	1		6	1	3	4	10
DMD	1				1		1		1		1						1				1		1					1					1									6	3	1	4	10
DPP3		1				1				1		1						1		1				1					1							1					1	6	2	2	4	10
EDEM1	1		1					1	1		1						1							1				1								1			1			6	2	2	4	10
EGR3	1				1		1		1								1		1		1		1					1											1			6	3	1	4	10
EVI2A	1		1		1				1		1						1							1		1						1				1						6	2	2	4	10
FBP1	1		1		1				1		1						1							1				1				1						1				6	2	2	4	10
FCGR3B	1		1						1		1		1				1							1					1			1								1		6	2	2	4	10
FCGRT	1		1		1				1		1						1						1					1					1						1			6	2	2	4	10
FES	1		1		1				1				1				1						1									1						1			1	6	1	3	4	10
FILIP1L	1		1		1				1		1				1								1					1					1						1			6	2	2	4	10
FRY	1				1				1		1				1		1						1					1					1						1			6	2	2	4	10
GMFG	1		1		1				1		1						1						1					1								1			1			6	2	2	4	10
GNAQ	1				1				1		1		1				1						1					1				1						1				6	2	2	4	10
HILPDA		1				1				1		1						1		1		1							1								1	1				6	2	2	4	10
IDH2		1				1		1		1		1						1						1		1						1						1				6	2	2	4	10
IDI1	1				1				1		1				1		1							1								1				1				1		6	1	3	4	10
IQGAP2			1		1		1		1		1						1											1				1						1		1		6	1	3	4	10
JPT1		1				1				1		1						1		1				1		1			1			1										6	3	1	4	10
KCTD12	1				1		1		1		1						1						1					1				1						1				6	2	2	4	10
KIT	1		1		1		1		1		1										1		1					1		1												6	4	0	4	10
KL	1				1				1		1		1				1						1					1								1			1			6	2	2	4	10
LBH	1		1		1				1		1						1											1					1						1	1		6	1	3	4	10
MAP3K3	1		1		1				1		1						1						1					1				1								1		6	2	2	4	10
MEOX2	1		1		1				1		1								1				1		1			1											1			6	3	1	4	10
MRGBP		1				1				1		1						1		1				1					1			1							1			6	2	2	4	10
MRPL9		1		1		1				1		1						1						1					1							1			1			6	2	2	4	10
MYD88	1		1		1				1		1						1							1					1			1							1			6	2	2	4	10
N4BP2L1	1				1				1		1						1		1				1					1											1	1		6	2	2	4	10
NFIB	1		1		1		1		1		1										1		1					1												1		6	3	1	4	10
NRGN	1		1		1				1		1						1											1				1						1		1		6	1	3	4	10
NUP205		1		1		1				1		1						1						1					1							1				1		6	2	2	4	10
OSBPL1A	1		1		1				1		1						1						1					1										1		1		6	2	2	4	10
PCLAF		1				1				1		1						1		1				1					1								1	1				6	2	2	4	10
PCYOX1	1		1		1			1	1								1						1					1											1		1	6	2	2	4	10
PDE4B	1		1		1				1		1						1							1								1				1				1		6	1	3	4	10
PLCL2	1				1		1		1		1						1						1					1											1	1		6	2	2	4	10
PLPP3	1				1				1		1				1		1						1		1			1										1				6	3	1	4	10
PPP1R16B	1		1		1				1		1						1						1					1								1			1			6	2	2	4	10
RAP2B		1				1		1		1		1						1						1		1			1			1										6	3	1	4	10
RBM5	1		1		1		1		1		1												1		1			1											1			6	3	1	4	10
RCBTB2	1				1		1		1		1						1				1		1					1								1						6	3	1	4	10
RFC5		1		1		1		1		1								1											1				1			1			1			6	1	3	4	10
SATB1	1			1	1		1		1								1						1					1				1									1	6	2	2	4	10
SCRN1		1		1		1		1		1								1															1			1			1	1		6	0	4	4	10
SH3BP5	1				1		1		1		1						1						1					1					1						1			6	2	2	4	10
SIRPA	1		1		1				1		1						1				1		1					1				1										6	3	1	4	10
SLBP		1		1		1		1		1		1												1					1			1							1			6	2	2	4	10
SNRPB		1				1		1		1		1						1						1					1			1							1			6	2	2	4	10
SNRPN	1				1		1		1		1								1									1					1						1	1		6	1	3	4	10
SPSB1		1	1							1		1						1		1			1			1			1												1	6	3	1	4	10
STX7	1		1		1				1		1						1						1										1						1	1		6	1	3	4	10
TIPARP	1		1		1				1		1				1								1					1					1			1						6	2	2	4	10
TNFSF12	1		1		1				1		1						1						1					1								1				1		6	2	2	4	10
TPK1	1		1		1				1		1						1						1					1				1							1			6	2	2	4	10
TRIP13		1				1				1		1		1				1						1		1			1									1				6	3	1	4	10
VAMP3	1		1		1				1		1						1						1					1				1							1			6	2	2	4	10
VCL	1		1		1			1	1		1												1					1				1								1		6	2	2	4	10
VEGFD	1				1				1		1				1		1						1		1			1										1				6	3	1	4	10
VPS72		1				1		1		1		1						1						1					1										1	1		6	2	2	4	10
XPC	1				1		1		1		1						1											1					1						1	1		6	1	3	4	10
ZEB1	1				1				1		1		1				1						1					1				1						1				6	2	2	4	10
ZNF217		1				1		1		1		1						1						1					1										1	1		6	2	2	4	10
ZZEF1	1				1		1		1		1						1						1					1				1							1			6	2	2	4	10
BID			1			1		1		1		1												1					1			1						1				5	2	2	4	9
CASC3	1			1				1	1		1																	1					1						1	1		5	1	3	4	9
CAST	1		1		1				1		1												1					1											1	1		5	2	2	4	9
CTDSP1	1		1		1				1		1												1					1											1	1		5	2	2	4	9
DERL1		1		1		1				1		1																	1			1						1			1	5	1	3	4	9
DUSP12		1		1		1		1		1														1					1			1				1						5	2	2	4	9
DUSP3	1		1		1				1		1												1					1				1									1	5	2	2	4	9
F12		1		1		1				1		1												1					1									1			1	5	2	2	4	9
FBXO3	1			1	1				1		1												1													1			1	1		5	1	3	4	9
FBXW2	1				1			1	1		1												1					1											1	1		5	2	2	4	9
FIBP		1		1		1		1		1														1		1			1										1			5	3	1	4	9
FKBPL		1		1		1				1		1												1					1									1		1		5	2	2	4	9
FOXO1	1		1		1				1		1												1					1											1	1		5	2	2	4	9
FUBP1		1		1		1				1		1													1			1								1			1			5	2	2	4	9
GAPVD1	1		1		1				1		1												1					1											1	1		5	2	2	4	9
HSD17B11	1		1		1				1		1												1					1								1			1			5	2	2	4	9
IK	1		1		1				1		1												1					1								1				1		5	2	2	4	9
IRS2	1			1	1		1		1												1		1					1											1			5	3	1	4	9
KLF10	1				1		1		1		1												1					1				1						1				5	2	2	4	9
KPNA4	1		1			1		1				1											1						1										1		1	5	2	2	4	9
LMNA	1		1		1				1		1												1					1										1			1	5	2	2	4	9
LRRC61		1		1		1	1			1														1					1									1		1		5	2	2	4	9
LTC4S	1		1		1		1		1														1					1								1					1	5	2	2	4	9
MAP3K14	1				1		1		1		1																	1								1			1	1		5	1	3	4	9
MXRA7	1		1		1		1		1														1					1								1					1	5	2	2	4	9
NFE2L2	1		1					1	1			1											1					1											1	1		5	2	2	4	9
NISCH	1				1		1		1		1												1		1			1											1			5	3	1	4	9
PHF2	1			1	1				1		1												1					1											1	1		5	2	2	4	9
PIP4K2A	1				1			1	1		1																	1				1				1				1		5	1	3	4	9
PLA2G16	1				1		1		1		1												1					1								1		1				5	2	2	4	9
PPBP	1		1		1		1		1														1									1				1				1		5	1	3	4	9
PTPN12	1		1					1	1		1													1					1				1						1			5	2	2	4	9
RAB1A		1		1		1		1		1														1					1			1									1	5	2	2	4	9
RNF44		1		1		1		1		1														1								1							1	1		5	1	3	4	9
RPA1		1		1		1		1				1											1										1						1	1		5	1	3	4	9
SIRT1	1			1	1				1		1												1					1								1			1			5	2	2	4	9
SLK	1		1		1				1		1												1					1				1								1		5	2	2	4	9
SNTB2	1		1		1			1	1														1					1											1	1		5	2	2	4	9
TBCC		1		1		1				1		1												1					1			1							1			5	2	2	4	9
TGOLN2	1				1			1	1		1												1					1								1			1			5	2	2	4	9
TPCN1	1		1		1		1				1												1					1				1								1		5	2	2	4	9
TSPAN14	1		1		1			1	1														1					1				1								1		5	2	2	4	9
ZBTB20				1	1		1		1		1												1		1			1											1			5	3	1	4	9
ZNF544		1		1		1				1		1												1									1						1	1		5	1	3	4	9
ADAR		1				1		1		1														1					1										1	1		4	2	2	4	8
AIM2		1				1		1		1														1					1				1						1			4	2	2	4	8
ALS2CL	1		1		1		1																1		1			1										1				4	3	1	4	8
ANKMY2		1		1			1			1													1					1					1						1			4	2	2	4	8
APOBEC3C		1	1					1	1														1					1								1			1			4	2	2	4	8
APOC1	1		1						1		1													1					1									1		1		4	2	2	4	8
ARHGEF12	1		1		1				1																			1					1						1	1		4	1	3	4	8
ARL6IP1		1				1		1		1														1					1							1			1			4	2	2	4	8
BAX		1				1		1		1														1									1						1		1	4	1	3	4	8
BICRAL	1				1				1		1												1					1											1	1		4	2	2	4	8
C15orf39			1			1				1		1																1				1						1			1	4	1	3	4	8
C3orf14		1		1		1				1														1		1													1	1		4	2	2	4	8
CAPRIN2	1			1	1				1														1					1											1	1		4	2	2	4	8
CASP3		1		1		1				1														1					1				1							1		4	2	2	4	8
CCDC92	1				1				1		1												1					1											1	1		4	2	2	4	8
CD24		1		1			1			1														1									1						1	1		4	1	3	4	8
CD38		1				1	1			1														1					1			1						1				4	2	2	4	8
CDK5		1		1		1				1														1					1									1			1	4	2	2	4	8
CLEC2B	1		1						1		1												1									1				1		1				4	1	3	4	8
CLK4					1		1		1		1												1					1								1			1			4	2	2	4	8
CLU	1				1		1		1														1					1								1		1				4	2	2	4	8
CMC2		1				1				1		1												1					1							1			1			4	2	2	4	8
CORO1B		1	1			1				1														1									1						1		1	4	1	3	4	8
CUTC	1		1						1		1												1					1											1	1		4	2	2	4	8
CXCL10			1			1		1		1														1		1			1									1				4	3	1	4	8
DNAJC12		1		1			1			1														1				1										1		1		4	2	2	4	8
EIF4EBP2	1		1		1				1														1					1				1						1				4	2	2	4	8
EIF4ENIF1				1		1		1	1														1					1											1	1		4	2	2	4	8
ENAH		1		1		1				1														1					1									1			1	4	2	2	4	8
EOGT	1				1				1		1												1					1								1			1			4	2	2	4	8
FBXL5	1				1				1		1												1					1				1								1		4	2	2	4	8
FIS1	1		1		1						1												1					1				1								1		4	2	2	4	8
FTSJ1		1				1		1		1														1		1			1			1										4	3	1	4	8
GALNT10		1						1		1	1																	1				1		1		1						4	1	3	4	8
GCNT1		1		1			1			1														1								1						1			1	4	1	3	4	8
GEMIN6		1				1				1		1												1					1										1	1		4	2	2	4	8
GLS			1					1	1		1												1					1					1						1			4	2	2	4	8
HHEX	1		1					1	1																			1			1	1									1	4	2	2	4	8
HLA-DPB1			1		1				1		1													1								1				1			1			4	1	3	4	8
IER2	1				1		1		1												1				1			1				1										4	3	1	4	8
IFI16			1			1		1		1													1										1						1	1		4	1	3	4	8
IMPAD1				1				1		1		1														1			1									1			1	4	2	2	4	8
IP6K1	1				1				1		1												1					1		1										1		4	3	1	4	8
IRF1	1		1						1		1													1								1				1				1		4	1	3	4	8
ITGA6	1							1	1			1									1		1		1			1														4	4	0	4	8
ITM2B	1				1				1		1												1					1				1						1				4	2	2	4	8
ITPK1	1				1				1		1												1					1				1								1		4	2	2	4	8
JADE1	1				1				1		1												1					1											1	1		4	2	2	4	8
JAK1	1				1				1		1												1					1											1	1		4	2	2	4	8
JAM3	1				1				1		1												1					1				1						1				4	2	2	4	8
KANSL1L	1				1				1		1												1													1			1		1	4	1	3	4	8
KAT2B	1				1				1		1												1					1								1			1			4	2	2	4	8
KCTD5		1		1		1				1														1		1			1										1			4	3	1	4	8
KIAA0040	1				1				1		1																	1					1						1	1		4	1	3	4	8
KIAA0355	1				1				1		1												1					1											1	1		4	2	2	4	8
KLHL3	1			1	1				1														1		1			1												1		4	3	1	4	8
LBR		1				1		1		1																			1			1		1						1		4	1	3	4	8
LHFPL6	1				1				1		1										1		1		1			1														4	4	0	4	8
LIMS1	1		1						1		1												1						1						1				1			4	2	2	4	8
LMBRD1	1				1				1		1												1					1								1			1			4	2	2	4	8
LPL	1				1				1		1										1		1					1									1					4	3	1	4	8
LRMP	1		1				1		1														1										1						1	1		4	1	3	4	8
LYZ	1		1		1				1															1					1			1						1				4	2	2	4	8
MAFB	1		1					1	1														1					1				1						1				4	2	2	4	8
MAN1A1	1				1				1		1												1					1								1				1		4	2	2	4	8
MAP4	1				1				1		1												1					1											1		1	4	2	2	4	8
MARCH8	1				1				1		1												1					1											1	1		4	2	2	4	8
MET		1	1			1				1													1		1			1										1				4	3	1	4	8
MICALL1			1			1		1				1																1				1						1			1	4	1	3	4	8
MINK1	1				1				1		1												1					1					1							1		4	2	2	4	8
MPRIP	1				1				1		1												1									1		1				1				4	1	3	4	8
NDUFB5		1				1		1		1													1						1										1		1	4	2	2	4	8
NOC3L		1				1		1		1														1									1						1	1		4	1	3	4	8
OAS1		1	1					1		1														1					1				1						1			4	2	2	4	8
PAM		1		1	1						1												1					1								1		1				4	2	2	4	8
PARP12			1			1		1			1													1					1										1	1		4	2	2	4	8
PBXIP1		1			1				1		1												1					1								1				1		4	2	2	4	8
PDCD10						1		1		1		1												1					1										1	1		4	2	2	4	8
PF4	1				1				1		1																		1			1				1				1		4	1	3	4	8
PFDN6		1						1		1		1												1					1				1								1	4	2	2	4	8
PI4KA					1			1	1		1													1				1											1		1	4	2	2	4	8
PIK3IP1	1		1		1				1														1					1				1								1		4	2	2	4	8
PLPP1	1				1				1		1												1					1								1					1	4	2	2	4	8
PQLC1	1		1		1				1														1					1				1		1								4	2	2	4	8
PTGES3				1		1				1		1												1									1			1					1	4	1	3	4	8
PXN	1		1				1		1														1		1			1												1		4	3	1	4	8
RANBP9		1		1		1				1														1					1										1		1	4	2	2	4	8
RBL2	1				1				1		1												1					1											1	1		4	2	2	4	8
RBM34		1		1		1				1																			1				1			1			1			4	1	3	4	8
RERE				1	1		1		1														1		1			1												1		4	3	1	4	8
RGS10		1	1					1		1														1		1							1						1			4	2	2	4	8
RMI1		1		1		1				1														1					1										1	1		4	2	2	4	8
RNF38	1				1				1		1												1					1								1			1			4	2	2	4	8
RNF4		1		1		1				1																		1				1				1			1			4	1	3	4	8
ROR1	1		1		1				1														1					1					1						1			4	2	2	4	8
RPA3		1				1				1		1												1					1			1								1		4	2	2	4	8
SCAND1		1				1				1		1												1				1											1		1	4	2	2	4	8
SERINC1	1				1				1		1												1					1								1			1			4	2	2	4	8
SFRP1	1			1	1				1												1		1					1										1				4	3	1	4	8
SIK2	1				1				1		1												1					1								1			1			4	2	2	4	8
SIK3	1				1				1		1												1					1											1	1		4	2	2	4	8
SLA	1		1						1		1													1					1										1	1		4	2	2	4	8
SLC23A2	1			1	1				1														1					1					1							1		4	2	2	4	8
SLC38A1				1		1		1		1														1				1					1						1			4	2	2	4	8
SLC9A3R1		1				1				1		1												1				1				1						1				4	2	2	4	8
SMIM10L1		1				1				1		1																	1							1			1		1	4	1	3	4	8
SMYD3		1		1		1				1														1		1						1									1	4	2	2	4	8
SSPN	1		1		1				1														1					1						1				1				4	2	2	4	8
ST14		1				1				1		1												1				1					1						1			4	2	2	4	8
STAT5B	1				1				1		1												1					1				1								1		4	2	2	4	8
STX6		1				1		1		1														1					1										1	1		4	2	2	4	8
SYNPO	1				1				1		1												1					1				1						1				4	2	2	4	8
TAF1C	1		1		1				1														1		1			1												1		4	3	1	4	8
TFRC	1		1					1	1															1					1				1						1			4	2	2	4	8
THSD1	1		1						1		1												1		1			1											1			4	3	1	4	8
TIMM17A		1				1		1		1														1					1			1				1						4	2	2	4	8
TIMM23		1				1				1		1												1					1			1									1	4	2	2	4	8
TLN1	1		1						1		1												1					1						1						1		4	2	2	4	8
TNFSF13	1		1						1		1													1				1				1						1				4	2	2	4	8
TRADD		1	1				1			1																		1				1						1		1		4	1	3	4	8
TRIAP1		1				1				1		1												1												1			1		1	4	1	3	4	8
TSPYL2				1	1		1		1														1					1											1	1		4	2	2	4	8
TXNDC9		1		1		1				1														1		1			1											1		4	3	1	4	8
U2SURP		1				1				1		1												1					1				1						1			4	2	2	4	8
USP1				1		1		1		1																			1							1			1	1		4	1	3	4	8
VASH1	1		1						1		1												1					1					1						1			4	2	2	4	8
WDFY3	1			1	1				1														1					1										1		1		4	2	2	4	8
ZFYVE16	1				1				1		1												1					1											1	1		4	2	2	4	8
ZMYND8		1		1		1				1														1									1						1	1		4	1	3	4	8
ZNF107		1				1		1		1														1									1			1			1			4	1	3	4	8
ZNF189	1			1				1	1														1					1					1						1			4	2	2	4	8
ABI1	1					1						1																	1				1			1			1			3	1	3	4	7
ACVR2A				1					1			1									1		1					1										1				3	3	1	4	7
ADAM19			1			1		1																1		1			1											1		3	3	1	4	7
ADGRA2	1				1				1														1		1			1													1	3	3	1	4	7
ADO	1					1		1																1									1			1			1			3	1	3	4	7
AGMAT		1				1				1														1					1				1						1			3	2	2	4	7
AKR1C2						1		1				1											1					1										1		1		3	2	2	4	7
ALDH1A3			1				1			1											1		1					1													1	3	3	1	4	7
ALDH3A2	1		1				1																1					1					1						1			3	2	2	4	7
ALDH7A1		1			1					1													1					1										1		1		3	2	2	4	7
AMPD2		1				1				1																		1				1						1		1		3	1	3	4	7
ANK3					1		1		1															1				1				1								1		3	2	2	4	7
ANKRA2		1		1						1											1							1											1	1		3	2	2	4	7
ANPEP			1		1						1										1		1					1										1				3	3	1	4	7
ARHGAP19	1							1	1														1					1											1	1		3	2	2	4	7
ARHGAP32		1								1		1												1				1				1						1				3	2	2	4	7
ARPP19	1							1	1														1					1					1						1			3	2	2	4	7
ASCC1				1		1				1																			1				1						1		1	3	1	3	4	7
ASF1A				1				1				1																					1			1			1	1		3	0	4	4	7
ATF1	1					1			1														1					1											1	1		3	2	2	4	7
BATF		1	1							1														1				1								1			1			3	2	2	4	7
BMPR1A	1				1				1																								1			1			1		1	3	0	4	4	7
C1orf174		1				1				1											1															1			1	1		3	1	3	4	7
C2orf49						1				1		1												1					1							1					1	3	2	2	4	7
CACYBP		1				1				1														1					1							1			1			3	2	2	4	7
CCDC88A	1							1	1																				1				1						1		1	3	1	3	4	7
CCNL1	1				1				1															1	1			1								1						3	3	1	4	7
CD14	1		1						1														1					1				1						1				3	2	2	4	7
CKLF		1	1							1														1		1			1										1			3	3	1	4	7
CLEC7A			1						1		1													1					1			1						1				3	2	2	4	7
CNBP	1							1				1											1					1								1			1			3	2	2	4	7
CNKSR1		1		1						1														1				1				1						1				3	2	2	4	7
COQ8A		1							1		1												1					1				1								1		3	2	2	4	7
CTDSP2	1		1						1														1					1											1	1		3	2	2	4	7
CTIF	1				1				1												1		1					1										1				3	3	1	4	7
DAZAP1						1				1		1												1					1										1		1	3	2	2	4	7
DCK						1		1		1														1					1			1							1			3	2	2	4	7
DDX17	1				1				1																			1					1						1	1		3	1	3	4	7
DENND2D		1	1							1														1									1						1	1		3	1	3	4	7
DEPP1	1								1		1												1					1										1		1		3	2	2	4	7
DIS3						1		1	1														1					1								1			1			3	2	2	4	7
ECHDC2					1		1		1														1		1			1											1			3	3	1	4	7
EPOR	1			1	1																		1						1			1						1				3	2	2	4	7
ESYT1	1								1		1												1					1					1						1			3	2	2	4	7
F13A1			1		1				1														1					1				1						1				3	2	2	4	7
FAM168B	1							1	1														1					1					1						1			3	2	2	4	7
FAM49A	1		1						1														1					1				1						1				3	2	2	4	7
FAM8A1					1				1		1												1					1											1	1		3	2	2	4	7
FBXO7	1		1						1																			1				1				1			1			3	1	3	4	7
FKBP1A	1		1						1																							1		1			1	1				3	0	4	4	7
FUT8		1				1				1														1				1				1				1						3	2	2	4	7
G0S2	1		1						1														1					1				1								1		3	2	2	4	7
GATA3	1								1		1													1				1										1		1		3	2	2	4	7
GPR137B			1					1	1															1		1										1			1			3	2	2	4	7
GSTM2				1			1		1														1					1										1		1		3	2	2	4	7
H2AFY		1				1				1														1								1							1		1	3	1	3	4	7
HCP5		1	1							1														1					1										1	1		3	2	2	4	7
HIST2H2BE		1		1						1														1								1						1			1	3	1	3	4	7
HK1						1		1				1												1				1				1								1		3	2	2	4	7
HOXD4		1								1		1											1		1			1										1				3	3	1	4	7
IER3		1	1							1														1				1				1						1				3	2	2	4	7
IER3IP1				1				1		1														1					1									1			1	3	2	2	4	7
IGFBP4			1						1		1												1					1					1						1			3	2	2	4	7
ING3	1				1				1														1		1											1			1			3	2	2	4	7
ISCA1	1			1					1														1					1				1				1						3	2	2	4	7
ITGA4	1		1								1													1					1			1						1				3	2	2	4	7
ITGA7	1				1				1														1		1			1													1	3	3	1	4	7
JHY	1				1				1														1					1								1				1		3	2	2	4	7
KDM3B					1				1		1												1					1											1	1		3	2	2	4	7
LAMC2			1			1				1											1		1					1										1				3	3	1	4	7
LINC01963	1				1				1														1					1					1						1			3	2	2	4	7
LONRF1	1				1				1														1		1			1											1			3	3	1	4	7
LPAR6	1				1				1														1					1				1				1						3	2	2	4	7
LRIG1					1		1		1														1					1											1	1		3	2	2	4	7
LUZP1	1		1						1														1													1			1		1	3	1	3	4	7
MAGED2		1		1			1																	1				1					1						1			3	2	2	4	7
MCCC1		1						1	1												1		1																1		1	3	2	2	4	7
MEMO1		1								1		1												1					1			1									1	3	2	2	4	7
MKNK2	1		1						1														1									1							1	1		3	1	3	4	7
MMD						1		1		1													1									1				1				1		3	1	3	4	7
MOB3B	1				1				1														1									1						1			1	3	1	3	4	7
MPC1					1				1		1												1					1								1					1	3	2	2	4	7
MREG						1		1				1												1												1		1		1		3	1	3	4	7
MT2A	1		1						1																			1				1				1		1				3	1	3	4	7
MYDGF		1				1				1														1								1						1			1	3	1	3	4	7
NAALAD2	1		1						1														1		1											1			1			3	2	2	4	7
NAB1	1			1					1												1		1					1											1			3	3	1	4	7
NAP1L2	1			1					1														1					1								1				1		3	2	2	4	7
NAP1L3				1	1				1														1					1								1				1		3	2	2	4	7
NFYB	1				1				1														1										1						1	1		3	1	3	4	7
NOD2	1		1						1															1					1							1			1			3	2	2	4	7
NOSIP			1			1						1																1					1						1	1		3	1	3	4	7
NOTCH1	1		1						1														1					1											1	1		3	2	2	4	7
PADI2		1			1					1											1							1										1		1		3	2	2	4	7
PAFAH1B1	1				1				1														1					1					1							1		3	2	2	4	7
PARP3			1				1		1														1					1					1						1			3	2	2	4	7
PCF11					1				1		1												1					1								1			1			3	2	2	4	7
PEBP1	1				1				1														1					1					1						1			3	2	2	4	7
PGM1	1		1						1														1			1		1											1			3	3	1	4	7
PHC2		1		1						1														1				1				1								1		3	2	2	4	7
PHTF1				1			1			1														1					1				1						1			3	2	2	4	7
PJA2	1				1				1														1					1								1			1			3	2	2	4	7
PLEKHM2	1		1						1														1					1				1							1			3	2	2	4	7
PNMA2				1	1						1												1					1					1						1			3	2	2	4	7
PNRC1	1				1				1														1													1			1	1		3	1	3	4	7
POLDIP3	1							1	1														1					1											1		1	3	2	2	4	7
PPL	1		1						1												1		1		1			1														3	4	0	4	7
PRELP	1				1				1														1					1									1				1	3	2	2	4	7
PRNP	1							1	1														1					1				1				1						3	2	2	4	7
PTPN22			1							1	1													1					1				1						1			3	2	2	4	7
RAB27A	1		1		1																					1						1				1		1				3	1	3	4	7
RABGAP1	1				1				1														1					1											1	1		3	2	2	4	7
RBM15						1		1		1																			1			1				1			1			3	1	3	4	7
RECQL	1					1		1															1						1										1	1		3	2	2	4	7
REV1		1		1					1														1					1											1	1		3	2	2	4	7
RNF114		1				1		1																1					1							1			1			3	2	2	4	7
RNFT2		1				1				1														1		1			1										1			3	3	1	4	7
S100P			1				1			1												1		1					1									1				3	3	1	4	7
SCAMP4		1		1			1																	1				1					1								1	3	2	2	4	7
SGK1	1							1	1															1				1				1						1				3	2	2	4	7
SHMT1		1								1		1											1					1										1		1		3	2	2	4	7
SIPA1L1		1	1							1											1							1											1	1		3	2	2	4	7
SLC25A28	1				1				1																			1				1				1				1		3	1	3	4	7
SLC25A36					1			1	1														1		1														1		1	3	2	2	4	7
SLC37A1		1					1				1													1								1		1				1				3	1	3	4	7
SMAD3	1		1						1																1			1				1						1				3	2	2	4	7
SNED1		1			1				1														1					1					1						1			3	2	2	4	7
SON					1				1		1												1					1											1	1		3	2	2	4	7
SPACA9	1				1				1														1					1										1			1	3	2	2	4	7
SPG11					1				1		1																	1					1						1	1		3	1	3	4	7
SRSF6	1				1				1																1			1											1		1	3	2	2	4	7
STAT3	1								1		1																	1				1				1				1		3	1	3	4	7
STK17B	1		1		1																			1					1			1						1				3	2	2	4	7
STK26		1				1				1														1					1										1		1	3	2	2	4	7
SYNE2	1				1				1																			1					1						1	1		3	1	3	4	7
TBC1D2	1		1						1															1		1		1				1										3	3	1	4	7
TGFBRAP1		1						1	1														1					1				1							1			3	2	2	4	7
THAP11				1		1			1																			1								1			1	1		3	1	3	4	7
TIMP1		1				1				1														1								1						1			1	3	1	3	4	7
TIMP4				1	1		1																1		1			1										1				3	3	1	4	7
TMEM87A			1						1		1																	1					1			1			1			3	1	3	4	7
TOMM7	1		1						1														1					1											1	1		3	2	2	4	7
TOR1AIP1					1				1		1												1					1								1			1			3	2	2	4	7
TPST1		1		1		1																	1					1				1						1				3	2	2	4	7
TRIB2	1		1						1																			1				1						1		1		3	1	3	4	7
TSPYL1	1				1				1														1					1								1			1			3	2	2	4	7
TTC28	1				1				1														1					1					1						1			3	2	2	4	7
TTI1		1				1				1														1									1						1	1		3	1	3	4	7
UBXN7						1		1				1											1						1							1			1			3	2	2	4	7
UQCRC1		1				1				1													1					1				1							1			3	2	2	4	7
USP11				1	1				1														1					1					1						1			3	2	2	4	7
WDR37	1				1				1														1					1								1			1			3	2	2	4	7
WDR59		1		1		1																			1			1											1	1		3	2	2	4	7
WSB2				1		1		1																					1				1			1			1			3	1	3	4	7
XBP1		1					1			1														1				1				1									1	3	2	2	4	7
XPA	1				1				1														1					1					1						1			3	2	2	4	7
ZC3H11A		1						1		1														1	1								1						1			3	2	2	4	7
ZC3H13	1								1		1												1					1					1							1		3	2	2	4	7
ZC3HAV1	1							1	1														1					1											1	1		3	2	2	4	7
ZCCHC6	1		1						1																			1					1						1	1		3	1	3	4	7
ZFP36L1		1	1							1															1			1											1	1		3	2	2	4	7
ZFP36L2	1				1				1														1					1				1								1		3	2	2	4	7
ZHX3	1				1				1														1					1				1						1				3	2	2	4	7
ZNF177	1			1					1														1					1					1						1			3	2	2	4	7
ZNF267						1		1		1																			1							1			1	1		3	1	3	4	7
ZNF302				1					1		1												1					1					1						1			3	2	2	4	7
ACADVL					1				1														1					1				1									1	2	2	2	4	6
AFTPH		1		1																				1									1						1	1		2	1	3	4	6
AMIGO2										1	1																	1					1			1			1			2	1	3	4	6
APOC2			1						1															1		1			1												1	2	3	1	4	6
ARL4A		1	1																						1			1				1						1				2	2	2	4	6
ARMCX2				1	1																							1					1						1	1		2	1	3	4	6
BACH2	1								1														1					1											1	1		2	2	2	4	6
BASP1							1			1														1								1						1		1		2	1	3	4	6
BIN1									1		1												1		1			1												1		2	3	1	4	6
BNIP3L	1								1														1					1											1	1		2	2	2	4	6
BRD8		1		1																					1			1											1	1		2	2	2	4	6
C12orf29	1								1														1													1			1	1		2	1	3	4	6
C2orf68						1			1														1					1								1			1			2	2	2	4	6
CASP8AP2						1		1																					1				1						1	1		2	1	3	4	6
CCNG2								1		1																		1									1		1	1		2	1	3	4	6
CD48	1		1																					1								1				1				1		2	1	3	4	6
CDC25B						1		1																					1				1						1	1		2	1	3	4	6
CDC40								1	1														1													1			1	1		2	1	3	4	6
CDK5R1				1		1																		1					1			1								1		2	2	2	4	6
CDKN1B	1								1																							1				1			1	1		2	0	4	4	6
CEBPA			1						1														1					1				1									1	2	2	2	4	6
CELSR1							1			1														1									1						1		1	2	1	3	4	6
CEP57				1		1																	1										1			1			1			2	1	3	4	6
CHD9					1				1														1		1			1											1			2	3	1	4	6
CHMP7		1				1																						1								1			1	1		2	1	3	4	6
CLCN7		1								1														1				1										1			1	2	2	2	4	6
CNOT6						1				1														1					1				1							1		2	2	2	4	6
COL9A2		1								1														1									1						1		1	2	1	3	4	6
COPZ2			1						1														1			1		1										1				2	3	1	4	6
CTNND1	1		1																				1					1				1						1				2	2	2	4	6
CXCR3			1							1														1									1			1			1			2	1	3	4	6
CYLD	1								1														1					1								1			1			2	2	2	4	6
DEFB1			1							1											1							1					1								1	2	2	2	4	6
EIF3K						1		1															1					1				1							1			2	2	2	4	6
EP400				1					1														1					1					1						1			2	2	2	4	6
ETHE1	1		1																							1		1											1		1	2	2	2	4	6
EXOC1						1				1													1					1											1	1		2	2	2	4	6
F2R			1						1															1												1			1	1		2	1	3	4	6
FAM193B					1				1														1		1			1												1		2	3	1	4	6
FAM208A	1									1													1					1					1						1			2	2	2	4	6
FAM234B	1					1																		1	1			1										1				2	3	1	4	6
FOXC1					1		1														1		1							1											1	2	3	1	4	6
FUS								1		1														1									1			1		1				2	1	3	4	6
GABBR1					1				1																1			1											1	1		2	2	2	4	6
GALT	1								1														1		1			1											1			2	3	1	4	6
GGT5		1								1													1					1										1			1	2	2	2	4	6
GMPPB		1								1														1				1				1						1				2	2	2	4	6
GOLGA8A				1					1												1							1								1			1			2	2	2	4	6
HAUS4		1								1													1					1											1	1		2	2	2	4	6
HERPUD1		1	1																									1				1						1		1		2	1	3	4	6
HES1				1			1																	1				1				1						1				2	2	2	4	6
HIP1R		1								1																		1				1						1		1		2	1	3	4	6
HMGN3				1	1																		1		1								1						1			2	2	2	4	6
HNRNPH3	1								1														1					1								1			1			2	2	2	4	6
HSPA14						1				1														1									1			1			1			2	1	3	4	6
IFT27		1								1														1	1													1			1	2	2	2	4	6
IGH		1								1											1							1				1						1				2	2	2	4	6
IGLL3P		1								1											1											1						1		1		2	1	3	4	6
IGLV1-44		1								1																						1		1				1		1		2	0	4	4	6
IL23A				1		1																		1												1			1	1		2	1	3	4	6
IPW	1								1														1					1					1						1			2	2	2	4	6
KCNN4		1								1																		1					1				1		1			2	1	3	4	6
KRT5								1				1									1		1					1		1												2	4	0	4	6
LHFPL2			1								1										1							1											1	1		2	2	2	4	6
LOC728392	1								1														1					1											1	1		2	2	2	4	6
MAP2K4	1								1														1					1											1	1		2	2	2	4	6
MAP3K4	1								1																			1								1			1	1		2	1	3	4	6
MCUB						1				1																1			1										1	1		2	2	2	4	6
MDFIC			1								1												1					1					1						1			2	2	2	4	6
MED17								1		1														1								1				1			1			2	1	3	4	6
MXI1	1								1												1		1					1											1			2	3	1	4	6
MYCBP2								1	1														1					1								1			1			2	2	2	4	6
MYOM2	1								1														1					1										1		1		2	2	2	4	6
NCKIPSD		1		1																			1					1											1		1	2	2	2	4	6
NKTR					1				1																1			1								1			1			2	2	2	4	6
NT5E		1								1													1									1		1				1				2	1	3	4	6
NUP58						1					1													1					1							1			1			2	2	2	4	6
OXTR					1		1														1		1					1													1	2	3	1	4	6
PAIP2B					1				1														1					1					1							1		2	2	2	4	6
PARM1					1						1																					1		1			1	1				2	0	4	4	6
PHF20	1								1																							1				1			1	1		2	0	4	4	6
PI4KAP1									1		1													1				1											1		1	2	2	2	4	6
PKP4						1				1													1		1			1										1				2	3	1	4	6
PLAUR	1		1																					1		1			1			1										2	3	1	4	6
PNPLA2					1						1												1					1										1			1	2	2	2	4	6
PPP2R5C	1								1														1										1						1	1		2	1	3	4	6
PPWD1	1								1														1					1								1			1			2	2	2	4	6
PSD4		1	1																					1				1											1	1		2	2	2	4	6
PTPN7			1							1														1									1		1				1			2	1	3	4	6
QARS		1									1												1					1				1							1			2	2	2	4	6
RBM23	1								1															1				1				1								1		2	2	2	4	6
RFX5		1								1														1					1			1								1		2	2	2	4	6
RPL23AP7			1							1													1			1			1										1			2	3	1	4	6
SAFB				1				1															1					1											1	1		2	2	2	4	6
SERINC5		1							1																			1					1						1	1		2	1	3	4	6
SF3A3								1	1														1					1								1			1			2	2	2	4	6
SLC48A1	1								1														1					1					1				1					2	2	2	4	6
SORL1		1								1																		1				1						1		1		2	1	3	4	6
SQLE						1				1														1					1			1						1				2	2	2	4	6
STK17A						1				1														1		1						1				1						2	2	2	4	6
SYF2					1				1														1					1				1							1			2	2	2	4	6
TBX21	1								1																								1			1			1	1		2	0	4	4	6
TMEM255A	1								1														1					1								1			1			2	2	2	4	6
TOP1						1				1														1									1						1	1		2	1	3	4	6
TP73-AS1					1				1														1					1				1							1			2	2	2	4	6
TPP2		1								1													1					1								1					1	2	2	2	4	6
TRAPPC4		1				1																		1												1			1	1		2	1	3	4	6
TRIM68		1		1																			1					1					1						1			2	2	2	4	6
TUBD1	1					1																											1			1			1	1		2	0	4	4	6
USP10										1		1												1					1										1	1		2	2	2	4	6
USP15	1					1																		1					1										1	1		2	2	2	4	6
USP47				1					1														1					1								1			1			2	2	2	4	6
VPS51									1		1												1					1				1							1			2	2	2	4	6
WDR82					1			1															1					1											1	1		2	2	2	4	6
WLS		1			1																1		1					1												1		2	3	1	4	6
WWOX		1			1																		1					1				1						1				2	2	2	4	6
XKR8		1								1																			1			1						1		1		2	1	3	4	6
YBX3	1								1														1		1								1						1			2	2	2	4	6
YTHDC1	1								1														1					1								1			1			2	2	2	4	6
ZBED5		1		1																			1					1								1			1			2	2	2	4	6
ZC3H4	1								1														1					1											1	1		2	2	2	4	6
ZNF638				1					1																1								1						1	1		2	1	3	4	6
ACADM					1																		1					1					1						1			1	2	2	4	5
ADD2	1																						1											1				1		1		1	1	3	4	5
AMT									1														1		1			1												1		1	3	1	4	5
ANK1				1																			1										1				1			1		1	1	3	4	5
ARPC3										1														1		1			1										1			1	3	1	4	5
BAG5				1																			1					1				1							1			1	2	2	4	5
BRD1				1																			1					1											1	1		1	2	2	4	5
C1RL			1																				1					1								1			1			1	2	2	4	5
C2CD5									1														1													1			1	1		1	1	3	4	5
C4A		1																										1									1	1		1		1	1	3	4	5
C6orf48		1																					1					1				1							1			1	2	2	4	5
CAPN6		1																			1		1		1			1														1	4	0	4	5
CCNB1IP1	1																											1				1				1					1	1	1	3	4	5
COL6A1			1																				1					1									1				1	1	2	2	4	5
CR1	1																						1									1					1	1				1	1	3	4	5
CRLF3								1																1								1							1	1		1	1	3	4	5
DDX58								1																1					1							1				1		1	2	2	4	5
DOCK10											1													1									1						1	1		1	1	3	4	5
FCMR										1														1									1						1	1		1	1	3	4	5
FYB1	1																							1					1			1				1						1	2	2	4	5
GBP2			1																									1								1			1	1		1	1	3	4	5
GLOD4				1																			1					1											1	1		1	2	2	4	5
GOLGA8G									1														1					1											1		1	1	2	2	4	5
GPATCH8						1																	1					1											1	1		1	2	2	4	5
GRHPR									1														1					1											1		1	1	2	2	4	5
H3F3B	1																								1			1								1			1			1	2	2	4	5
HERC5			1																										1							1			1	1		1	1	3	4	5
HTRA1		1																					1					1									1	1				1	2	2	4	5
IDO1											1													1					1								1			1		1	2	2	4	5
JADE2									1														1					1											1	1		1	2	2	4	5
LGALS1			1																				1			1						1									1	1	2	2	4	5
LIPT1									1														1					1											1	1		1	2	2	4	5
MICAL3						1																	1					1				1				1						1	2	2	4	5
MMP24OS		1																					1					1				1						1				1	2	2	4	5
MNT												1											1					1				1							1			1	2	2	4	5
MPPED2				1																			1					1		1										1		1	3	1	4	5
MRNIP					1																							1					1						1	1		1	1	3	4	5
MSANTD2									1														1					1											1	1		1	2	2	4	5
MTMR3				1																			1					1				1								1		1	2	2	4	5
NAB2										1													1					1					1								1	1	2	2	4	5
NCOA2										1																		1				1							1	1		1	1	3	4	5
NOTCH2								1															1					1				1								1		1	2	2	4	5
OFD1					1																				1			1								1			1			1	2	2	4	5
OGT		1																							1			1					1						1			1	2	2	4	5
PAF1						1																	1					1					1						1			1	2	2	4	5
PASK										1														1									1						1	1		1	1	3	4	5
PFKM				1																								1					1						1	1		1	1	3	4	5
PHLPP1	1																				1		1					1													1	1	3	1	4	5
PIGG		1																							1			1											1	1		1	2	2	4	5
PIGO						1																		1				1										1			1	1	2	2	4	5
PJA1				1																			1					1											1	1		1	2	2	4	5
POLR2A									1														1					1					1							1		1	2	2	4	5
POU6F1					1																		1		1			1								1						1	3	1	4	5
PTPRK		1																														1		1			1	1				1	0	4	4	5
RANBP6				1																			1					1								1			1			1	2	2	4	5
RHOH										1														1				1											1	1		1	2	2	4	5
RPL18												1									1							1				1						1				1	2	2	4	5
RPS14			1																		1		1					1											1			1	3	1	4	5
RSRC2	1																											1							1				1		1	1	1	3	4	5
SNTG2	1																						1		1			1										1				1	3	1	4	5
SNURF									1																			1								1			1	1		1	1	3	4	5
SNW1						1																	1					1								1			1			1	2	2	4	5
SRSF3						1																		1	1											1			1			1	2	2	4	5
SRSF8										1																		1				1				1				1		1	1	3	4	5
STAM	1																							1									1			1			1			1	1	3	4	5
TANK	1																						1					1							1				1			1	2	2	4	5
TDP2						1																							1							1			1	1		1	1	3	4	5
TRIM14											1													1					1										1	1		1	2	2	4	5
TRMT1L					1																		1										1						1	1		1	1	3	4	5
TSPAN31					1																		1					1					1								1	1	2	2	4	5
UBXN1						1																	1					1				1		1								1	2	2	4	5
UNC5B		1																						1		1			1									1				1	3	1	4	5
UPF3A									1														1					1					1						1			1	2	2	4	5
UROD		1																					1					1											1	1		1	2	2	4	5
ZNF672		1																						1					1			1								1		1	2	2	4	5
ADAM29																							1						1				1						1			0	2	2	4	4
AGAP7P																							1		1			1											1			0	3	1	4	4
ALG13																							1		1			1											1			0	3	1	4	4
ARMH3																							1					1				1		1								0	2	2	4	4
CCR5																								1					1							1		1				0	2	2	4	4
CEBPA-DT																							1					1										1			1	0	2	2	4	4
CTDNEP1																							1					1						1						1		0	2	2	4	4
DMXL2																								1					1			1						1				0	2	2	4	4
ENDOD1																												1								1			1	1		0	1	3	4	4
IKZF3																													1				1			1			1			0	1	3	4	4
KIF21B																																1				1		1		1		0	0	4	4	4
MARC1																							1					1										1		1		0	2	2	4	4
MARCH3																							1										1						1	1		0	1	3	4	4
MYBL1																													1							1			1	1		0	1	3	4	4
NFU1																							1													1			1		1	0	1	3	4	4
OR6A2																								1					1								1	1				0	2	2	4	4
PCIF1																							1					1				1									1	0	2	2	4	4
POGZ																									1			1											1	1		0	2	2	4	4
PSMG2																							1									1				1			1			0	1	3	4	4
RUBCNL																												1					1						1	1		0	1	3	4	4
SLC4A1																							1						1									1		1		0	2	2	4	4
TMEM268																								1									1						1	1		0	1	3	4	4
TMX2-CTNND1																								1				1				1						1				0	2	2	4	4
TNFAIP8																							1										1						1	1		0	1	3	4	4
ZBTB14																							1													1			1	1		0	1	3	4	4
CNN1	1		1		1		1		1		1		1		1		1		1				1					1		1												10	3	0	3	13
DEPDC1		1		1		1		1		1		1		1		1		1		1				1					1											1		10	2	1	3	13
EXO1		1		1		1		1		1		1		1		1		1		1				1					1									1				10	2	1	3	13
FABP4	1		1		1		1		1		1		1		1		1		1				1		1			1														10	3	0	3	13
FAM107A	1		1		1		1		1		1		1		1		1		1				1		1			1														10	3	0	3	13
SOX17	1		1		1		1		1		1		1		1		1		1				1		1			1														10	3	0	3	13
SOX4		1		1		1		1		1		1		1		1		1		1				1								1						1				10	1	2	3	13
ADH1B	1		1		1		1		1		1		1		1		1						1		1			1														9	3	0	3	12
CCNA2		1		1		1		1		1		1				1		1		1				1					1									1				9	2	1	3	12
CCNB2		1		1		1		1		1		1				1		1		1				1					1									1				9	2	1	3	12
CDC20		1		1		1		1		1		1				1		1		1				1					1									1				9	2	1	3	12
CDCA3		1		1		1		1		1		1				1		1		1				1					1									1				9	2	1	3	12
CDCA8		1		1		1		1		1		1				1		1		1				1					1									1				9	2	1	3	12
CLDN18	1		1		1		1		1		1		1		1		1						1										1					1				9	1	2	3	12
EMCN	1		1		1		1		1		1		1				1		1				1		1			1														9	3	0	3	12
FOXM1		1		1		1		1		1		1				1		1		1				1					1									1				9	2	1	3	12
HMMR		1		1		1		1		1		1		1				1		1				1					1									1				9	2	1	3	12
ITIH5	1				1		1		1		1		1		1		1		1				1		1			1														9	3	0	3	12
JAM2	1		1		1		1		1		1		1				1		1				1					1												1		9	2	1	3	12
LDB2	1		1		1		1		1		1		1				1		1				1		1			1														9	3	0	3	12
MAD2L1		1		1		1		1		1		1				1		1		1				1		1			1													9	3	0	3	12
MELK		1		1		1		1		1		1				1		1		1				1					1									1				9	2	1	3	12
MMRN1	1		1		1		1		1		1				1		1		1				1		1			1														9	3	0	3	12
PBK		1		1		1		1		1		1				1		1		1				1					1											1		9	2	1	3	12
PLK1		1		1		1		1		1		1				1		1		1				1					1								1					9	2	1	3	12
PPAT		1		1		1		1		1		1				1		1		1									1				1						1			9	1	2	3	12
RRM2		1		1		1		1		1		1				1		1		1				1					1									1				9	2	1	3	12
SLC7A5		1		1		1		1		1		1				1		1		1				1					1									1				9	2	1	3	12
SLIT3	1		1		1				1		1		1		1		1		1				1					1										1				9	2	1	3	12
ACTL6A		1		1		1		1		1		1						1		1				1					1										1			8	2	1	3	11
AOC3	1		1		1				1		1		1		1		1						1		1			1														8	3	0	3	11
ARHGAP6	1				1		1		1		1		1				1		1				1		1			1														8	3	0	3	11
AURKA		1		1		1		1		1		1						1		1				1					1									1				8	2	1	3	11
CAD		1		1		1		1		1		1						1		1				1													1		1			8	1	2	3	11
CDCA4		1		1		1		1		1		1						1		1				1					1			1										8	2	1	3	11
CENPF		1		1		1		1		1		1				1		1						1					1									1				8	2	1	3	11
CHRDL1	1				1		1		1		1				1		1		1				1					1										1				8	2	1	3	11
CIT		1		1		1		1		1				1				1		1				1					1								1					8	2	1	3	11
COL5A2		1		1		1		1		1		1				1		1						1					1		1											8	3	0	3	11
ENG	1		1		1				1		1		1		1		1						1					1				1										8	2	1	3	11
ENO1		1	1			1		1		1		1						1		1												1					1				1	8	0	3	3	11
EPAS1	1		1		1		1		1		1		1				1						1		1			1														8	3	0	3	11
ERCC6L		1		1		1		1		1						1		1		1				1					1									1				8	2	1	3	11
ESPL1		1		1		1		1		1		1						1		1				1					1									1				8	2	1	3	11
FMO2	1		1		1				1		1		1		1		1						1					1										1				8	2	1	3	11
GPM6A	1		1		1				1		1		1		1		1						1										1						1			8	1	2	3	11
HJURP		1				1		1		1		1				1		1		1				1					1									1				8	2	1	3	11
HPRT1		1		1		1		1		1		1						1		1				1					1										1			8	2	1	3	11
HSPB6	1		1		1		1		1		1				1		1						1					1										1				8	2	1	3	11
ID4	1			1	1				1		1		1				1		1		1		1					1														8	3	0	3	11
IL18RAP	1		1		1		1		1		1						1		1																	1		1		1		8	0	3	3	11
KIF15		1		1		1		1		1		1						1		1				1					1										1			8	2	1	3	11
KIF2C		1		1		1		1		1		1						1		1				1					1								1					8	2	1	3	11
KIFC1		1		1		1				1		1				1		1		1				1					1									1				8	2	1	3	11
KLF2	1		1		1		1		1		1						1		1				1		1			1														8	3	0	3	11
LAMP3	1		1		1			1	1		1				1		1							1					1									1				8	2	1	3	11
LAPTM4B		1		1		1		1		1		1		1				1						1					1									1				8	2	1	3	11
LRP8		1		1		1		1		1		1						1		1				1					1												1	8	2	1	3	11
LRRC15		1	1			1		1		1						1		1		1				1		1			1													8	3	0	3	11
LTBP4	1		1		1		1		1		1				1		1						1		1			1														8	3	0	3	11
MARCKSL1		1		1		1		1		1		1				1		1						1								1					1					8	1	2	3	11
MCM6		1		1		1		1		1		1						1		1				1					1										1			8	2	1	3	11
MKI67		1		1		1		1		1		1				1		1						1					1									1				8	2	1	3	11
MNDA	1		1		1		1		1		1				1		1							1		1						1										8	2	1	3	11
MYH10	1		1		1				1		1		1		1		1						1					1												1		8	2	1	3	11
NDC80		1		1		1		1		1		1						1		1				1					1							1						8	2	1	3	11
NETO2		1		1		1		1		1		1						1		1				1									1						1			8	1	2	3	11
PALMD	1				1		1		1		1		1				1		1				1		1			1														8	3	0	3	11
PDE2A	1				1		1		1		1				1		1		1				1		1			1														8	3	0	3	11
PDZD2	1		1		1		1		1		1				1		1						1					1												1		8	2	1	3	11
PLOD2		1		1		1		1		1		1				1		1								1			1											1		8	2	1	3	11
PRX	1		1		1		1		1		1		1				1											1								1		1				8	1	2	3	11
RAI2	1				1		1		1		1				1		1		1				1					1								1						8	2	1	3	11
RAMP3	1		1		1		1		1		1		1				1						1					1										1				8	2	1	3	11
RFC2		1		1		1		1		1		1						1		1				1					1			1										8	2	1	3	11
ROBO4	1		1		1				1		1		1		1		1						1					1										1				8	2	1	3	11
RSRC1		1		1		1		1		1		1						1		1									1							1			1			8	1	2	3	11
RTN1	1			1	1				1		1				1		1		1				1					1												1		8	2	1	3	11
S1PR1	1				1		1		1		1		1		1		1						1					1				1										8	2	1	3	11
SHMT2		1		1		1		1		1		1						1		1				1									1						1			8	1	2	3	11
SKP2		1		1		1		1		1		1						1		1									1										1	1		8	1	2	3	11
SLC12A8		1				1		1		1		1				1		1		1				1														1			1	8	1	2	3	11
SPARCL1	1		1		1		1		1		1				1		1				1		1					1														8	3	0	3	11
SPP1		1				1		1		1		1		1		1		1						1					1												1	8	2	1	3	11
SRM		1		1		1		1		1		1						1		1				1								1						1				8	1	2	3	11
SRPK1		1		1		1		1		1		1				1		1						1					1											1		8	2	1	3	11
SRPX	1		1		1				1		1		1		1		1						1		1			1														8	3	0	3	11
STARD8	1		1		1				1		1		1		1		1						1					1										1				8	2	1	3	11
STMN1		1		1		1		1		1		1						1		1				1					1										1			8	2	1	3	11
TK1		1		1		1		1		1		1						1		1				1					1									1				8	2	1	3	11
TMEM132A		1				1		1		1		1				1		1		1				1					1									1				8	2	1	3	11
TYMS		1		1		1		1		1		1						1		1				1					1									1				8	2	1	3	11
UCK2		1		1		1		1		1		1						1		1				1		1			1													8	3	0	3	11
VWF	1		1		1				1		1		1		1		1						1					1										1				8	2	1	3	11
A2M	1		1		1		1		1		1						1						1		1			1														7	3	0	3	10
ACSS3	1				1		1		1				1				1		1				1					1										1				7	2	1	3	10
ADAMTS1	1		1		1				1		1				1		1						1		1			1														7	3	0	3	10
ADCY9	1		1		1		1		1		1						1											1										1			1	7	1	2	3	10
AGTPBP1	1		1		1				1		1		1				1						1						1										1			7	2	1	3	10
ALDH1A2	1		1		1				1						1		1		1				1					1										1				7	2	1	3	10
ALDOA		1				1		1		1		1						1		1				1				1													1	7	2	1	3	10
ANG	1		1		1		1		1		1								1				1					1										1				7	2	1	3	10
ANXA3	1		1		1				1		1		1				1						1					1												1		7	2	1	3	10
AP1S1		1		1		1		1		1								1		1				1					1												1	7	2	1	3	10
APOL3	1		1		1				1		1		1				1						1													1				1		7	1	2	3	10
ARHGEF15	1		1		1				1		1		1				1						1		1			1														7	3	0	3	10
ARHGEF5			1			1		1		1		1						1		1								1				1						1				7	1	2	3	10
ARHGEF6	1		1		1				1		1		1				1						1					1				1										7	2	1	3	10
ATF3	1		1		1		1		1		1								1		1							1										1				7	2	1	3	10
BRCA1		1		1		1		1		1								1		1				1					1				1									7	2	1	3	10
C1orf21	1		1		1				1		1				1		1						1		1			1														7	3	0	3	10
CALCOCO1	1		1		1		1		1		1						1						1					1					1									7	2	1	3	10
CAND1		1		1		1		1		1		1						1						1					1										1			7	2	1	3	10
CD69	1		1		1				1		1						1		1					1								1				1						7	1	2	3	10
CENPN		1		1		1				1		1						1		1				1					1									1				7	2	1	3	10
CKAP2		1		1		1		1		1								1		1				1					1									1				7	2	1	3	10
CLDN5	1		1		1				1		1				1		1						1		1			1														7	3	0	3	10
CLEC3B	1		1				1		1		1		1				1						1		1			1														7	3	0	3	10
CLIC3	1		1		1				1		1				1		1							1												1				1		7	1	2	3	10
CNIH4		1	1			1		1		1		1								1				1					1										1			7	2	1	3	10
COL1A1		1		1		1		1		1		1						1						1							1							1				7	2	1	3	10
COLEC12	1		1		1				1		1				1		1						1					1									1					7	2	1	3	10
COX7A1	1		1		1		1		1		1						1				1		1					1														7	3	0	3	10
CSE1L		1		1		1		1		1		1						1						1					1										1			7	2	1	3	10
CTSS	1		1		1		1		1		1						1							1								1							1			7	1	2	3	10
DENND3	1		1		1				1		1				1		1															1		1				1				7	0	3	3	10
DLC1	1		1		1				1		1				1		1						1		1			1														7	3	0	3	10
DNMT1		1		1		1		1		1		1								1				1					1										1			7	2	1	3	10
DPYSL2	1		1		1				1		1				1		1						1		1			1														7	3	0	3	10
ELMO1	1			1	1				1		1		1				1						1					1				1										7	2	1	3	10
EPRS		1		1		1		1		1				1				1						1					1				1									7	2	1	3	10
EZH2		1		1		1		1		1								1		1				1					1										1			7	2	1	3	10
FCN1	1		1		1				1		1		1				1						1									1						1				7	1	2	3	10
FLAD1		1				1		1		1		1						1		1				1					1										1			7	2	1	3	10
FLI1	1		1		1				1				1		1		1						1					1				1										7	2	1	3	10
FRMD4B	1		1		1				1		1				1		1						1					1								1						7	2	1	3	10
FZD3		1		1			1			1				1				1	1					1						1			1									7	2	1	3	10
GADD45B	1		1		1		1		1		1						1							1								1						1				7	1	2	3	10
GGH				1		1		1		1		1						1		1				1					1									1				7	2	1	3	10
GLRX	1		1		1		1		1		1						1															1						1		1		7	0	3	3	10
H2AFZ		1		1		1		1		1		1						1						1					1							1						7	2	1	3	10
HDGF		1				1		1		1		1						1		1				1					1			1										7	2	1	3	10
HNRNPAB		1				1		1		1		1						1		1				1					1			1										7	2	1	3	10
HSD17B6	1		1		1				1		1				1		1							1		1			1													7	3	0	3	10
HYAL1	1		1		1				1		1				1		1						1		1			1														7	3	0	3	10
ICAM2	1		1		1		1		1		1						1						1					1				1										7	2	1	3	10
ID2	1		1		1				1		1						1		1													1				1		1				7	0	3	3	10
ILF2		1		1		1		1		1		1						1						1					1			1										7	2	1	3	10
IRAK3	1		1		1		1		1		1						1						1									1						1				7	1	2	3	10
ITPR1	1		1		1		1		1		1						1											1				1							1			7	1	2	3	10
JUP		1				1		1		1		1						1		1								1		1		1										7	2	1	3	10
KDR	1		1		1		1		1		1						1						1					1										1				7	2	1	3	10
KIF18B		1				1				1		1				1		1		1				1					1									1				7	2	1	3	10
KIF1C	1		1		1		1		1		1						1						1					1													1	7	2	1	3	10
KLF6	1		1		1				1		1		1				1				1		1					1														7	3	0	3	10
KLRF1	1		1		1				1		1						1		1				1													1		1				7	1	2	3	10
LHX6	1		1		1		1		1				1						1				1		1			1														7	3	0	3	10
LIMCH1	1		1		1		1		1		1						1						1					1												1		7	2	1	3	10
LST1	1		1		1				1		1		1				1							1								1						1				7	1	2	3	10
LTA4H	1		1		1			1	1		1						1											1											1	1		7	1	2	3	10
MAFF	1		1		1		1		1		1						1				1		1					1														7	3	0	3	10
MAOB	1				1		1		1		1						1		1				1					1										1				7	2	1	3	10
MAPK13		1		1		1		1		1		1								1				1					1											1		7	2	1	3	10
MAPK6		1		1		1		1		1		1						1						1												1					1	7	1	2	3	10
MARS		1		1		1		1		1		1						1						1									1						1			7	1	2	3	10
MGLL	1		1		1		1		1		1						1						1					1				1										7	2	1	3	10
MLLT11				1		1		1		1		1						1		1				1									1						1			7	1	2	3	10
MLPH			1		1		1		1		1			1					1					1				1										1				7	2	1	3	10
MRPL3		1		1		1		1		1		1						1						1					1			1										7	2	1	3	10
MSR1	1		1		1				1		1				1		1									1			1									1				7	2	1	3	10
MSRA	1		1		1		1		1		1						1						1					1				1										7	2	1	3	10
MYOC	1				1		1		1		1						1		1				1		1																1	7	2	1	3	10
NCALD	1			1	1		1		1						1				1					1				1										1				7	2	1	3	10
NCAPG2		1				1		1		1		1						1		1				1					1										1			7	2	1	3	10
NME1		1		1				1		1		1						1		1				1					1			1										7	2	1	3	10
OLR1	1		1		1				1		1				1		1							1		1			1													7	3	0	3	10
PDK1		1				1		1		1		1				1		1														1				1		1				7	0	3	3	10
PFN2		1		1		1				1		1				1		1						1									1						1			7	1	2	3	10
PIMREG		1				1				1		1				1		1		1				1					1									1				7	2	1	3	10
PMAIP1		1		1		1				1		1						1		1									1							1			1			7	1	2	3	10
POLE2		1		1		1		1		1		1						1						1					1											1		7	2	1	3	10
POLQ		1		1		1		1		1								1		1				1					1									1				7	2	1	3	10
PPP1R15A	1		1		1		1		1		1						1						1					1										1				7	2	1	3	10
PTGDS	1		1				1		1		1				1		1						1					1										1				7	2	1	3	10
PTH1R	1				1				1		1		1		1		1						1					1										1				7	2	1	3	10
PTHLH		1				1		1		1		1						1		1	1		1					1														7	3	0	3	10
PTPRM	1		1				1		1		1		1				1						1					1								1						7	2	1	3	10
PYCR1		1		1		1				1		1		1				1						1					1									1				7	2	1	3	10
RGS5	1				1		1		1		1		1				1						1					1										1				7	2	1	3	10
SASH1	1		1		1				1		1		1				1						1		1			1														7	3	0	3	10
SEMA3G	1		1		1				1		1		1				1						1		1			1														7	3	0	3	10
SERPINB6	1		1		1		1		1		1						1											1				1				1						7	1	2	3	10
SH3GL3	1		1		1				1				1		1		1												1									1			1	7	1	2	3	10
SLC1A4		1		1		1		1		1		1						1						1								1						1				7	1	2	3	10
SLC27A3	1		1		1				1		1				1		1						1		1			1														7	3	0	3	10
SLC2A1		1		1		1		1		1		1						1						1					1			1										7	2	1	3	10
SMARCA2	1		1		1		1		1		1						1						1					1											1			7	2	1	3	10
SNRPD1		1		1		1		1		1		1						1						1					1			1										7	2	1	3	10
SPOCK2	1		1		1				1		1		1				1																1						1	1		7	0	3	3	10
STIP1		1				1		1		1		1						1		1				1					1				1									7	2	1	3	10
STX11	1		1		1				1		1				1		1						1									1							1			7	1	2	3	10
TACC1	1		1		1				1		1				1		1						1		1			1														7	3	0	3	10
TARS		1		1		1		1		1								1		1									1							1					1	7	1	2	3	10
TEK	1		1		1		1		1				1				1						1		1													1				7	2	1	3	10
THBD	1		1		1				1		1				1		1						1		1			1														7	3	0	3	10
TIMM8A		1		1		1				1		1						1		1									1				1								1	7	1	2	3	10
TMEM14A		1		1		1		1		1		1						1						1					1										1			7	2	1	3	10
TNS1	1		1		1		1		1		1						1						1					1												1		7	2	1	3	10
TOPBP1		1		1		1		1		1		1						1						1					1										1			7	2	1	3	10
TSC22D3	1		1		1		1		1		1				1								1					1										1				7	2	1	3	10
TUBA1C			1			1		1		1		1						1		1				1					1										1			7	2	1	3	10
TUBB6	1		1					1	1				1				1			1			1					1										1				7	2	1	3	10
TYROBP	1		1		1				1		1				1		1															1						1			1	7	0	3	3	10
UBE2L3		1		1		1		1		1		1								1				1												1					1	7	1	2	3	10
VCAN		1				1		1		1		1				1		1													1	1						1				7	1	2	3	10
WDR19	1			1	1		1		1		1								1				1					1											1			7	2	1	3	10
WISP1		1				1		1		1						1		1		1				1		1			1													7	3	0	3	10
ADGRE5	1				1				1		1				1		1						1					1				1										6	2	1	3	9
ADIRF	1				1				1		1				1		1						1		1			1														6	3	0	3	9
ADNP		1		1		1		1		1		1												1									1						1			6	1	2	3	9
ADRM1		1	1			1		1		1		1												1					1												1	6	2	1	3	9
AGPAT5		1		1		1		1		1								1						1									1						1			6	1	2	3	9
AKAP13	1		1		1				1		1						1						1					1											1			6	2	1	3	9
AMMECR1		1	1			1		1		1								1															1						1	1		6	0	3	3	9
ANK2	1			1	1		1		1										1				1		1			1														6	3	0	3	9
AQP9	1		1						1		1		1				1												1									1		1		6	1	2	3	9
ARHGAP29	1		1		1				1		1						1						1		1			1														6	3	0	3	9
ARTN		1				1				1		1						1		1								1									1				1	6	1	2	3	9
ATP2A2		1		1		1				1		1						1						1								1									1	6	1	2	3	9
AUNIP		1				1				1		1						1		1				1					1									1				6	2	1	3	9
CADM1	1				1			1	1		1						1									1												1			1	6	1	2	3	9
CADPS2		1	1		1		1				1								1					1				1										1				6	2	1	3	9
CALU		1	1			1		1		1								1								1			1												1	6	2	1	3	9
CAPG			1					1	1		1						1			1				1		1															1	6	2	1	3	9
CAPN3	1		1				1		1		1						1						1					1											1			6	2	1	3	9
CARD8	1		1		1				1		1						1						1					1												1		6	2	1	3	9
CBX1		1		1		1				1		1						1						1															1	1		6	1	2	3	9
CBX3		1	1			1		1		1								1						1					1				1									6	2	1	3	9
CCND3	1		1		1				1		1						1						1					1											1			6	2	1	3	9
CCT6A		1		1		1		1		1								1						1					1										1			6	2	1	3	9
CD34	1				1		1		1		1						1						1		1			1														6	3	0	3	9
CD81	1		1		1				1		1						1						1					1				1										6	2	1	3	9
CDC45		1				1				1		1						1		1				1					1									1				6	2	1	3	9
CEBPD	1		1		1				1		1						1						1					1				1										6	2	1	3	9
CELSR2		1		1		1		1				1						1										1									1				1	6	1	2	3	9
CENPU		1				1				1		1						1		1				1					1										1			6	2	1	3	9
CERKL	1			1			1		1		1								1					1								1						1				6	1	2	3	9
CHST6	1						1		1		1							1	1										1			1							1			6	1	2	3	9
CLIC2	1		1		1				1		1						1						1		1															1		6	2	1	3	9
CLSTN1		1		1		1				1		1						1						1				1											1			6	2	1	3	9
CPSF6		1		1		1		1		1		1												1					1												1	6	2	1	3	9
CSRP1	1		1		1				1		1						1				1		1					1														6	3	0	3	9
CYFIP2				1	1		1		1		1								1					1															1	1		6	1	2	3	9
CYP27B1		1				1				1		1						1		1				1														1			1	6	1	2	3	9
DAB2	1		1		1				1		1						1						1					1										1				6	2	1	3	9
DAP3		1				1		1		1		1						1						1					1			1										6	2	1	3	9
DBF4		1				1		1		1								1		1				1					1							1						6	2	1	3	9
DCTPP1		1				1				1		1						1		1				1					1										1			6	2	1	3	9
DENND5A	1				1			1	1		1						1						1					1				1										6	2	1	3	9
DENR		1		1		1		1		1								1						1															1		1	6	1	2	3	9
DLG5		1		1		1				1		1						1										1										1			1	6	1	2	3	9
DMXL1	1			1	1				1		1						1						1					1											1			6	2	1	3	9
DOCK9	1		1		1				1		1						1						1		1			1														6	3	0	3	9
DUSP6	1		1		1		1		1		1														1			1				1										6	2	1	3	9
EGR2	1		1				1		1		1						1				1							1											1			6	2	1	3	9
EHD2	1		1		1				1		1						1						1					1										1				6	2	1	3	9
EIF2B5		1				1		1		1		1						1						1	1														1			6	2	1	3	9
ENC1		1		1		1				1				1				1						1		1										1						6	2	1	3	9
ENTPD7		1				1				1		1				1		1						1					1									1				6	2	1	3	9
ERO1A		1				1				1		1				1		1						1												1		1				6	1	2	3	9
FBXO41		1		1		1				1		1						1						1															1		1	6	1	2	3	9
FBXO5				1		1		1		1		1						1						1					1										1			6	2	1	3	9
FERMT2	1				1				1		1		1				1						1					1										1				6	2	1	3	9
FNBP1	1		1		1				1		1						1						1					1				1										6	2	1	3	9
FNDC3B		1	1			1		1		1								1					1															1			1	6	1	2	3	9
FXYD1	1		1				1		1		1		1										1		1			1														6	3	0	3	9
FYN	1				1			1	1				1				1						1									1				1						6	1	2	3	9
GAMT		1		1		1				1				1				1						1				1										1				6	2	1	3	9
GAPDH		1		1		1				1		1						1						1					1												1	6	2	1	3	9
GID8		1				1				1		1						1		1				1					1										1			6	2	1	3	9
GMPS		1				1		1		1		1						1						1					1										1			6	2	1	3	9
GPC3	1		1		1				1				1		1								1		1			1														6	3	0	3	9
GPR65	1		1		1				1		1						1							1								1				1						6	1	2	3	9
GRAMD1C	1			1	1		1		1										1		1							1						1								6	2	1	3	9
GTF2IRD1		1		1		1				1		1						1						1		1												1				6	2	1	3	9
GTPBP8		1		1		1		1		1		1											1						1										1			6	2	1	3	9
HEBP1	1		1		1			1	1		1																	1				1						1				6	1	2	3	9
HERC1	1				1			1	1		1						1						1					1											1			6	2	1	3	9
HEY2	1			1	1		1		1										1		1		1					1														6	3	0	3	9
HIF1A		1				1		1		1		1						1						1								1				1						6	1	2	3	9
HLTF		1		1		1		1		1								1						1					1											1		6	2	1	3	9
HPCAL1	1		1		1				1		1						1							1					1										1			6	2	1	3	9
HSDL2	1		1		1				1		1						1						1					1											1			6	2	1	3	9
HSPA5		1		1		1		1		1								1						1								1						1				6	1	2	3	9
ID3	1		1		1				1		1						1											1					1						1			6	1	2	3	9
IFNGR1	1		1		1				1		1						1						1					1				1										6	2	1	3	9
IL3RA	1		1		1				1		1						1						1					1													1	6	2	1	3	9
INPP5A	1		1		1				1		1						1						1					1											1			6	2	1	3	9
INTS7		1		1		1		1		1								1						1					1										1			6	2	1	3	9
INTS8		1				1				1		1		1				1						1					1										1			6	2	1	3	9
ITGAL	1		1		1				1		1						1											1				1						1				6	1	2	3	9
JAG1	1			1				1	1			1	1										1					1													1	6	2	1	3	9
KANK2	1				1		1		1		1						1						1					1										1				6	2	1	3	9
KANK3	1				1				1		1				1		1						1		1			1														6	3	0	3	9
KDELR3		1	1			1				1		1						1								1			1									1				6	2	1	3	9
KIAA0513	1				1				1		1						1		1									1				1						1				6	1	2	3	9
KIF18A		1				1		1		1								1		1				1					1										1			6	2	1	3	9
KLF9	1				1				1				1		1		1						1		1			1														6	3	0	3	9
KPNA2		1		1						1		1						1		1				1					1			1										6	2	1	3	9
KPNB1		1		1		1		1		1								1															1						1	1		6	0	3	3	9
LAT2	1		1		1				1		1						1							1								1						1				6	1	2	3	9
LIPA			1		1			1	1		1						1							1				1				1										6	2	1	3	9
LRPPRC		1		1		1		1		1								1						1					1										1			6	2	1	3	9
LRRC41		1		1		1		1		1		1												1		1		1														6	3	0	3	9
LSM4		1		1		1		1		1										1				1					1			1										6	2	1	3	9
MACF1	1		1		1				1		1						1						1					1				1										6	2	1	3	9
MAGI2				1	1		1		1								1		1				1					1												1		6	2	1	3	9
MAGOHB		1				1		1		1		1						1						1					1										1			6	2	1	3	9
MAOA	1		1		1				1		1						1						1		1			1														6	3	0	3	9
MCTS1		1		1		1				1		1						1						1		1															1	6	2	1	3	9
MED14		1				1		1		1		1						1						1															1	1		6	1	2	3	9
MFNG	1		1		1				1		1						1						1					1				1										6	2	1	3	9
MORC2		1				1		1		1		1						1						1															1	1		6	1	2	3	9
MRPL15		1				1				1		1						1		1				1					1								1					6	2	1	3	9
MTFR1		1		1		1		1		1								1						1					1									1				6	2	1	3	9
MYH11	1		1		1		1		1						1						1		1					1														6	3	0	3	9
MYO1C	1		1		1				1		1						1						1					1										1				6	2	1	3	9
NIF3L1		1		1		1		1		1		1												1															1	1		6	1	2	3	9
NINJ2	1		1		1				1		1						1									1			1									1				6	2	1	3	9
NOL11		1		1		1		1		1								1						1												1			1			6	1	2	3	9
NUP62		1		1		1		1		1										1				1															1	1		6	1	2	3	9
P2RY13	1		1		1				1		1						1						1					1										1				6	2	1	3	9
PCDHGC3	1				1				1		1		1				1						1					1										1				6	2	1	3	9
PDCD6		1		1		1				1		1						1						1															1	1		6	1	2	3	9
PDCD6IP	1		1		1				1		1						1							1								1							1			6	1	2	3	9
PDE4A	1		1		1		1		1		1												1					1					1									6	2	1	3	9
PDE4D	1		1		1		1		1		1																					1						1		1		6	0	3	3	9
PDIA4		1		1		1				1		1						1						1								1						1				6	1	2	3	9
PDLIM2	1				1				1		1				1		1						1			1						1										6	2	1	3	9
PECAM1	1		1		1				1		1		1										1		1			1														6	3	0	3	9
PFDN2		1				1		1		1								1		1									1										1		1	6	1	2	3	9
PGK1		1				1		1		1		1						1						1					1			1										6	2	1	3	9
PHKA1		1		1		1				1		1						1						1														1		1		6	1	2	3	9
PID1	1				1		1		1		1						1						1					1												1		6	2	1	3	9
PIK3R3	1			1	1		1		1						1									1					1											1		6	2	1	3	9
PILRA	1		1						1		1				1		1							1								1						1				6	1	2	3	9
PLP1	1			1	1		1		1										1				1		1			1														6	3	0	3	9
PLTP		1	1			1				1		1								1			1					1													1	6	2	1	3	9
PPM1F	1		1		1				1		1						1						1					1				1										6	2	1	3	9
PPP2R5A	1		1					1	1		1						1						1		1							1										6	2	1	3	9
PRKCZ	1		1		1				1		1						1							1															1	1		6	1	2	3	9
PSMB4		1				1		1		1		1						1						1					1			1										6	2	1	3	9
PSMD11		1				1		1		1		1						1						1															1	1		6	1	2	3	9
R3HDM1		1		1		1		1		1								1											1										1		1	6	1	2	3	9
RAPGEF2	1				1		1		1		1						1						1					1												1		6	2	1	3	9
RASGRF1	1		1		1				1		1						1						1										1						1			6	1	2	3	9
RASSF1	1		1		1				1		1		1										1					1													1	6	2	1	3	9
RBM6	1		1		1		1		1		1												1		1			1														6	3	0	3	9
RCN2				1		1		1		1		1						1						1					1			1										6	2	1	3	9
RFTN1	1		1		1				1		1						1						1									1								1		6	1	2	3	9
RIN3	1		1		1				1		1						1						1																1	1		6	1	2	3	9
RNF13	1		1		1			1	1								1						1					1												1		6	2	1	3	9
RNF130	1		1		1				1		1						1						1																1	1		6	1	2	3	9
RNH1	1		1		1				1		1						1						1					1											1			6	2	1	3	9
RRAS	1		1		1				1		1						1						1					1				1										6	2	1	3	9
RUSC1		1		1		1				1		1						1						1					1												1	6	2	1	3	9
SAR1A	1		1		1			1	1			1																1								1			1			6	1	2	3	9
SCNM1		1	1			1		1		1		1												1					1			1										6	2	1	3	9
SEC14L1	1			1	1				1		1						1						1					1												1		6	2	1	3	9
SELENOP	1				1				1		1				1		1						1		1			1														6	3	0	3	9
SEMA6A	1		1		1				1				1				1						1		1																1	6	2	1	3	9
SEMA6D	1				1			1	1				1		1								1					1										1				6	2	1	3	9
SGPL1		1		1		1				1		1						1						1					1										1			6	2	1	3	9
SIDT2	1		1		1				1		1						1						1					1											1			6	2	1	3	9
SLC25A20	1		1		1				1		1						1						1					1										1				6	2	1	3	9
SLC7A7	1		1						1		1				1		1							1					1										1			6	2	1	3	9
SNRNP25		1				1				1		1		1				1						1					1										1			6	2	1	3	9
SNRPE		1		1						1		1						1		1				1					1										1			6	2	1	3	9
SOCS3	1		1		1		1		1								1								1													1		1		6	1	2	3	9
SOSTDC1	1		1		1				1				1		1						1							1		1												6	3	0	3	9
SPAST		1		1		1		1		1								1											1										1	1		6	1	2	3	9
SPINT1		1				1		1		1								1		1				1				1					1									6	2	1	3	9
SPTAN1	1		1		1				1		1						1						1					1											1			6	2	1	3	9
SPTBN1	1		1		1				1		1						1						1		1			1														6	3	0	3	9
STEAP1B		1				1				1		1						1		1												1		1				1				6	0	3	3	9
SUB1		1		1		1		1		1		1																				1						1			1	6	0	3	3	9
TAF2		1		1		1		1		1								1						1					1										1			6	2	1	3	9
TIMP3	1		1		1				1		1						1						1					1										1				6	2	1	3	9
TKT		1	1			1		1		1										1			1					1				1										6	2	1	3	9
TMEM204	1				1				1		1		1				1						1					1												1		6	2	1	3	9
TNS2	1				1				1		1				1		1						1		1			1														6	3	0	3	9
TP63		1				1		1		1		1						1			1							1													1	6	2	1	3	9
TRAK2	1		1		1				1		1						1						1																1	1		6	1	2	3	9
TRIM22	1		1		1				1		1						1																			1			1	1		6	0	3	3	9
UBE2I		1		1		1		1		1		1												1					1										1			6	2	1	3	9
UBFD1		1		1		1				1		1						1						1					1												1	6	2	1	3	9
UMPS		1				1		1		1		1						1						1					1											1		6	2	1	3	9
UNC119		1		1		1		1		1								1										1				1						1				6	1	2	3	9
VGLL3	1		1		1				1		1						1						1					1											1			6	2	1	3	9
VIM	1		1		1				1		1						1						1					1													1	6	2	1	3	9
WDHD1		1		1		1		1		1								1						1					1											1		6	2	1	3	9
WFS1	1		1		1				1		1						1								1			1										1				6	2	1	3	9
XPO1		1		1		1		1		1								1						1					1										1			6	2	1	3	9
YWHAZ		1				1		1		1		1						1						1					1										1			6	2	1	3	9
ZEB2	1		1		1				1		1						1						1													1			1			6	1	2	3	9
ZNF146		1		1		1		1		1								1						1					1											1		6	2	1	3	9
ZNF207		1		1		1		1		1		1												1								1									1	6	1	2	3	9
ZSCAN18	1			1	1		1		1		1														1			1											1			6	2	1	3	9
ZYX	1		1		1				1		1						1											1				1						1				6	1	2	3	9
ABCA1	1		1			1		1	1														1					1											1			5	2	1	3	8
ABI2	1			1	1					1		1												1					1									1				5	2	1	3	8
ACP1		1		1		1		1		1														1					1			1										5	2	1	3	8
ADA			1			1		1		1		1																	1									1			1	5	1	2	3	8
ADH1C	1		1		1		1		1														1		1			1														5	3	0	3	8
AGK		1		1		1				1		1												1								1						1				5	1	2	3	8
ANKRD6	1			1	1				1		1												1					1								1						5	2	1	3	8
APH1A		1	1			1		1		1														1										1							1	5	1	2	3	8
ARHGAP17	1		1		1				1		1												1					1											1			5	2	1	3	8
ARMC1		1		1		1		1		1																			1										1	1		5	1	2	3	8
ASCC3		1		1		1		1		1														1					1							1						5	2	1	3	8
ATP2B4	1		1		1				1		1												1										1						1			5	1	2	3	8
BACE1		1		1				1	1		1												1					1													1	5	2	1	3	8
BAZ2B	1			1	1		1		1														1					1									1					5	2	1	3	8
BTG2	1				1		1		1		1																	1											1	1		5	1	2	3	8
BUB3		1		1		1		1		1														1												1			1			5	1	2	3	8
CALCOCO2	1		1		1				1		1																	1				1									1	5	1	2	3	8
CAPZA1		1		1		1		1		1														1					1										1			5	2	1	3	8
CCDC47		1		1		1		1		1														1				1											1			5	2	1	3	8
CDC123		1		1		1		1		1														1					1										1			5	2	1	3	8
CFP	1				1		1		1		1												1									1						1				5	1	2	3	8
CRK	1		1		1				1		1												1					1												1		5	2	1	3	8
CSNK1D			1			1		1	1		1																	1				1							1			5	1	2	3	8
CTPS2		1		1		1				1		1												1					1				1									5	2	1	3	8
CTSF	1			1	1				1		1												1					1											1			5	2	1	3	8
CUL4B		1		1		1		1		1																							1						1	1		5	0	3	3	8
CX3CL1	1		1		1		1		1												1							1		1												5	3	0	3	8
DDX1				1		1		1		1		1																					1			1			1			5	0	3	3	8
DNAJC9		1		1				1		1		1												1					1										1			5	2	1	3	8
DPYSL3	1			1	1			1	1														1					1										1				5	2	1	3	8
ELAVL1		1		1		1				1		1												1					1										1			5	2	1	3	8
EPCAM		1				1				1				1				1						1					1											1		5	2	1	3	8
FADD		1				1		1		1		1												1												1			1			5	1	2	3	8
FASTKD3		1		1		1		1		1														1															1	1		5	1	2	3	8
FBXW4	1		1		1			1	1														1					1											1			5	2	1	3	8
FRYL	1		1		1				1		1												1										1						1			5	1	2	3	8
GDF10	1				1		1		1		1												1		1			1														5	3	0	3	8
HDAC5	1			1	1				1		1												1					1											1			5	2	1	3	8
HDHD3		1		1		1				1		1																1											1	1		5	1	2	3	8
HIST1H2BH		1		1		1				1		1												1					1												1	5	2	1	3	8
HIST3H2A		1		1		1				1		1												1														1		1		5	1	2	3	8
HMG20A	1			1				1	1		1																						1						1	1		5	0	3	3	8
HPSE		1		1		1				1		1												1		1			1													5	3	0	3	8
HSPA4		1		1		1		1		1																			1							1			1			5	1	2	3	8
HUS1		1				1		1		1		1												1					1							1						5	2	1	3	8
IFI30	1		1					1	1		1													1					1			1										5	2	1	3	8
ISG20	1		1			1	1			1														1								1								1		5	1	2	3	8
ITSN2	1				1			1	1		1												1													1			1			5	1	2	3	8
KIF2A		1		1		1				1		1												1					1											1		5	2	1	3	8
KLC1	1			1	1				1		1												1					1											1			5	2	1	3	8
LRRC8D		1		1		1		1		1														1									1						1			5	1	2	3	8
LSM7		1				1		1		1		1												1								1							1			5	1	2	3	8
MBNL1	1		1		1			1	1												1		1																1			5	2	1	3	8
MCL1	1		1		1				1		1														1			1								1						5	2	1	3	8
MPHOSPH9		1		1		1		1		1														1					1										1			5	2	1	3	8
MTMR4		1		1		1		1		1														1															1	1		5	1	2	3	8
NAAA	1				1		1		1		1																	1				1						1				5	1	2	3	8
NCBP1		1		1		1		1		1														1					1										1			5	2	1	3	8
NCOA4	1		1		1				1		1												1					1				1										5	2	1	3	8
NCSTN		1		1		1		1		1														1								1									1	5	1	2	3	8
NUCB2		1		1	1		1			1																		1				1						1				5	1	2	3	8
OVOL2		1		1		1	1			1														1				1										1				5	2	1	3	8
PANK3				1	1			1	1		1													1				1											1			5	2	1	3	8
PARN		1		1		1		1		1														1									1						1			5	1	2	3	8
PAXIP1		1		1		1		1		1														1															1	1		5	1	2	3	8
PCSK5	1		1		1		1		1														1					1												1		5	2	1	3	8
PHF11	1		1		1				1		1																	1								1			1			5	1	2	3	8
PHTF2		1		1		1		1		1														1					1										1			5	2	1	3	8
PLA2G7		1	1			1		1		1														1					1											1		5	2	1	3	8
POLR2K		1		1		1		1		1														1					1										1			5	2	1	3	8
POMGNT1		1		1		1	1			1																		1					1				1					5	1	2	3	8
PPP3CB	1			1	1				1		1												1					1				1										5	2	1	3	8
PRKACB	1				1			1	1		1																	1				1						1				5	1	2	3	8
PROM1		1		1	1		1			1											1							1											1			5	2	1	3	8
PRR5		1	1			1				1		1																1										1		1		5	1	2	3	8
PSMA4		1	1			1		1		1														1					1										1			5	2	1	3	8
PSMD12		1				1		1		1		1												1					1			1										5	2	1	3	8
RAB22A		1		1		1		1		1													1						1										1			5	2	1	3	8
RAB5B	1				1			1	1		1												1					1											1			5	2	1	3	8
RABIF		1		1		1				1		1												1					1			1										5	2	1	3	8
RASA1		1		1	1		1				1																	1											1	1		5	1	2	3	8
RBBP7		1		1		1		1		1														1												1			1			5	1	2	3	8
REM1	1		1		1		1		1														1		1													1				5	2	1	3	8
RGS16	1		1		1				1		1													1					1									1				5	2	1	3	8
RIPK2	1		1			1		1		1														1					1			1										5	2	1	3	8
RNF146	1			1	1				1		1												1										1							1		5	1	2	3	8
RPAP3		1		1		1		1		1														1					1											1		5	2	1	3	8
RPS6KA5	1			1	1		1		1																			1				1								1		5	1	2	3	8
SCARA3	1		1		1		1		1														1					1										1				5	2	1	3	8
SLC24A1	1				1		1		1		1												1					1										1				5	2	1	3	8
SP3		1		1		1		1		1																			1										1	1		5	1	2	3	8
TCF20		1				1		1		1		1																								1			1	1		5	0	3	3	8
TCF7L2	1		1		1				1		1												1					1				1										5	2	1	3	8
TFE3	1		1		1				1		1												1					1											1			5	2	1	3	8
TFPI	1		1		1				1		1												1		1			1														5	3	0	3	8
TIPRL		1		1		1		1		1																			1				1						1			5	1	2	3	8
TMBIM1	1		1					1	1		1												1					1				1										5	2	1	3	8
TMEM43	1		1					1	1		1												1					1											1			5	2	1	3	8
TOB1				1	1		1		1		1													1				1				1										5	2	1	3	8
TRPC1	1			1	1		1		1														1					1								1						5	2	1	3	8
TRRAP		1		1		1		1		1														1															1	1		5	1	2	3	8
UBE2K		1				1		1		1		1												1					1										1			5	2	1	3	8
USP21		1		1		1				1		1												1															1	1		5	1	2	3	8
YWHAQ				1		1		1		1		1																	1							1			1			5	1	2	3	8
ZNHIT3		1		1		1		1		1																										1			1	1		5	0	3	3	8
ACAD8		1		1			1			1																		1											1	1		4	1	2	3	7
ACAT1	1				1				1		1												1					1								1						4	2	1	3	7
ACSL5		1	1						1		1												1					1											1			4	2	1	3	7
ACTR3		1				1		1		1														1		1			1													4	3	0	3	7
ADAM17	1					1		1	1																											1			1		1	4	0	3	3	7
ADAM8		1	1			1				1														1								1								1		4	1	2	3	7
ADAMTS9	1		1		1				1																1			1										1				4	2	1	3	7
ADGRF5	1				1				1		1												1		1			1														4	3	0	3	7
ADGRG1		1				1				1		1																1								1				1		4	1	2	3	7
AFF1	1				1				1		1												1					1				1										4	2	1	3	7
AIP	1		1						1		1												1										1						1			4	1	2	3	7
AK4		1				1				1		1											1					1										1				4	2	1	3	7
AKAP7	1		1		1				1														1									1				1						4	1	2	3	7
ALDH1A1	1		1		1				1														1					1												1		4	2	1	3	7
ALDH6A1		1			1		1		1														1					1											1			4	2	1	3	7
AMOTL2	1				1				1		1												1		1			1														4	3	0	3	7
AMPD3		1				1	1			1														1								1								1		4	1	2	3	7
ANKLE2	1					1				1		1											1										1						1			4	1	2	3	7
ANP32E		1				1		1		1																			1							1			1			4	1	2	3	7
ANXA8L1	1		1						1			1									1									1								1				4	2	1	3	7
AP1G2		1		1		1				1														1				1											1			4	2	1	3	7
AQP3			1		1		1				1																	1				1						1				4	1	2	3	7
ARAP1	1				1				1		1												1					1											1			4	2	1	3	7
ARAP3	1				1				1		1												1		1			1														4	3	0	3	7
ARF1		1		1				1		1														1					1			1										4	2	1	3	7
ARHGAP44	1				1				1		1																	1					1						1			4	1	2	3	7
ARHGEF17	1				1				1		1												1					1										1				4	2	1	3	7
ARID5A	1				1		1		1												1							1				1										4	2	1	3	7
ARIH2	1				1				1		1												1					1											1			4	2	1	3	7
ARNT	1		1					1		1													1					1					1									4	2	1	3	7
ARPC5	1		1					1	1															1					1			1										4	2	1	3	7
ASS1		1	1							1		1											1															1			1	4	1	2	3	7
ATOX1		1	1			1				1														1									1								1	4	1	2	3	7
ATP10A	1				1				1		1												1										1					1				4	1	2	3	7
ATP6AP1		1		1	1			1																1								1									1	4	1	2	3	7
ATP6V1C1		1				1		1		1														1					1											1		4	2	1	3	7
ATXN7	1				1				1		1												1					1											1			4	2	1	3	7
AZIN1		1		1		1				1														1									1						1			4	1	2	3	7
BAZ1B		1		1		1		1																									1						1	1		4	0	3	3	7
BCAS4		1		1		1				1														1															1	1		4	1	2	3	7
BCL6	1		1		1				1														1					1											1			4	2	1	3	7
BDH2	1				1				1		1										1		1					1														4	3	0	3	7
BMP2K		1	1						1		1													1								1								1		4	1	2	3	7
BMPR2	1		1		1				1																								1		1				1			4	0	3	3	7
BMX	1				1		1		1														1					1										1				4	2	1	3	7
BST1	1		1		1				1														1					1				1										4	2	1	3	7
C1orf56		1		1		1				1														1									1						1			4	1	2	3	7
CAB39	1		1						1		1												1					1												1		4	2	1	3	7
CALR		1	1					1		1														1					1												1	4	2	1	3	7
CAVIN2	1				1				1		1												1					1												1		4	2	1	3	7
CBR3		1	1							1		1											1															1		1		4	1	2	3	7
CCL14	1						1		1		1												1		1			1														4	3	0	3	7
CCPG1					1		1		1		1												1					1												1		4	2	1	3	7
CD164		1		1	1						1												1													1			1			4	1	2	3	7
CD247	1		1						1		1																					1						1		1		4	0	3	3	7
CD27		1				1		1		1																							1						1	1		4	0	3	3	7
CD44	1							1	1		1																	1				1							1			4	1	2	3	7
CDC27	1					1		1		1													1						1											1		4	2	1	3	7
CDH1		1				1		1		1														1				1												1		4	2	1	3	7
CDS2	1				1			1	1																			1				1							1			4	1	2	3	7
CDV3	1		1					1	1														1													1			1			4	1	2	3	7
CELSR3		1		1		1				1														1									1						1			4	1	2	3	7
CEP76		1		1		1				1														1					1							1						4	2	1	3	7
CERS6		1				1				1		1												1								1									1	4	1	2	3	7
CFAP69	1				1				1		1												1		1			1														4	3	0	3	7
CGRRF1	1			1	1				1																			1								1			1			4	1	2	3	7
CIB1		1	1				1			1														1												1			1			4	1	2	3	7
CLCN6	1				1		1		1														1					1											1			4	2	1	3	7
CLGN		1		1		1				1														1					1											1		4	2	1	3	7
CLK2		1		1		1				1														1															1	1		4	1	2	3	7
COL4A5	1		1						1			1																1										1			1	4	1	2	3	7
CORO2A		1				1		1		1														1					1			1										4	2	1	3	7
CPEB1	1			1	1				1														1					1											1			4	2	1	3	7
CPQ	1				1				1		1												1					1								1						4	2	1	3	7
CPT1A	1				1				1		1														1			1				1										4	2	1	3	7
CREBZF		1		1		1				1														1				1								1						4	2	1	3	7
CREM	1			1			1		1															1								1								1		4	1	2	3	7
CRYAB	1		1		1				1												1		1					1														4	3	0	3	7
CSDE1	1				1				1		1												1																1		1	4	1	2	3	7
CSNK2A2				1		1		1	1														1					1											1			4	2	1	3	7
CTCF		1		1		1		1																				1											1	1		4	1	2	3	7
CTSH			1		1				1		1													1				1											1			4	2	1	3	7
CYB5R3	1				1				1		1												1					1											1			4	2	1	3	7
DAP		1		1				1		1														1		1						1										4	2	1	3	7
DBI	1		1					1	1																								1						1		1	4	0	3	3	7
DCTD		1		1		1				1													1					1											1			4	2	1	3	7
DDIT4		1				1				1		1																	1			1						1				4	1	2	3	7
DDX27		1				1		1		1														1															1		1	4	1	2	3	7
DECR1	1		1						1		1												1																1	1		4	1	2	3	7
DEPDC5		1				1				1		1																					1			1			1			4	0	3	3	7
DHTKD1		1		1		1				1														1					1											1		4	2	1	3	7
DIEXF		1				1				1		1												1					1											1		4	2	1	3	7
DNAJC10		1		1			1			1														1					1												1	4	2	1	3	7
DNM1		1		1				1		1													1					1													1	4	2	1	3	7
DNM1L				1		1				1		1																	1							1					1	4	1	2	3	7
DOLPP1		1		1		1				1														1													1	1				4	1	2	3	7
DVL2		1		1						1		1											1					1											1			4	2	1	3	7
DYRK1A	1			1	1				1																											1			1	1		4	0	3	3	7
EED		1		1						1		1																								1			1	1		4	0	3	3	7
EFEMP2	1		1		1				1														1					1										1				4	2	1	3	7
EFHC1				1	1		1		1																			1											1		1	4	1	2	3	7
EGFL7	1		1						1		1												1					1										1				4	2	1	3	7
EIF3M		1				1		1		1													1									1									1	4	1	2	3	7
ELF1	1		1		1				1																											1			1		1	4	0	3	3	7
EMP1	1		1		1				1														1					1													1	4	2	1	3	7
EPHX1			1		1		1		1														1					1													1	4	2	1	3	7
ERGIC2		1				1		1		1																			1				1							1		4	1	2	3	7
ETV5	1		1					1	1												1							1													1	4	2	1	3	7
EVL	1				1				1		1																	1											1	1		4	1	2	3	7
F10	1				1		1		1														1		1			1														4	3	0	3	7
F3	1		1				1		1														1					1													1	4	2	1	3	7
FAM124B	1		1		1				1														1															1		1		4	1	2	3	7
FAM13B	1				1				1		1												1					1											1			4	2	1	3	7
FANCF		1		1		1				1														1															1	1		4	1	2	3	7
FBL						1		1		1		1																1				1							1			4	1	2	3	7
FHL2		1		1		1				1																		1										1		1		4	1	2	3	7
FKBP1B	1						1		1		1																	1					1						1			4	1	2	3	7
FOXK2		1				1		1		1														1					1			1										4	2	1	3	7
FOXO3	1		1		1				1														1					1												1		4	2	1	3	7
FRAT1	1		1		1				1																			1				1							1			4	1	2	3	7
FZD5	1		1						1		1												1					1												1		4	2	1	3	7
GAB2	1				1				1		1												1					1											1			4	2	1	3	7
GABARAPL3	1				1				1		1												1					1								1						4	2	1	3	7
GABRE		1	1			1		1															1		1			1														4	3	0	3	7
GALNT12		1			1		1				1												1																1	1		4	1	2	3	7
GCHFR			1		1				1		1																						1						1	1		4	0	3	3	7
GHR	1		1		1				1												1		1					1														4	3	0	3	7
GJA1	1		1					1	1														1					1											1			4	2	1	3	7
GNB5		1		1		1				1																		1								1			1			4	1	2	3	7
GRB7		1				1				1		1												1	1												1					4	2	1	3	7
GTF3C1		1		1		1				1														1															1	1		4	1	2	3	7
HIST1H2BF		1				1				1		1												1					1									1				4	2	1	3	7
HMGB2		1				1		1		1														1					1										1			4	2	1	3	7
HMOX1	1		1						1		1													1					1										1			4	2	1	3	7
HNRNPR		1				1		1		1														1					1										1			4	2	1	3	7
HOMER1	1			1		1			1																								1			1			1			4	0	3	3	7
HS3ST3A1		1		1		1				1														1		1			1													4	3	0	3	7
HSP90AA1		1		1		1				1														1					1										1			4	2	1	3	7
HSPD1		1				1				1		1												1					1			1										4	2	1	3	7
HSPH1		1		1		1				1														1					1										1			4	2	1	3	7
IGSF3		1				1		1				1												1									1						1			4	1	2	3	7
IL4R	1		1						1		1																	1											1	1		4	1	2	3	7
ILF3		1		1		1		1																					1				1						1			4	1	2	3	7
INPP4B			1		1		1			1														1				1											1			4	2	1	3	7
IPO4		1		1						1		1												1								1					1					4	1	2	3	7
IRF7		1	1			1				1														1					1										1			4	2	1	3	7
ISG20L2		1				1		1		1														1					1			1										4	2	1	3	7
ITK	1		1						1		1													1								1								1		4	1	2	3	7
ITM2C		1		1				1		1																		1				1						1				4	1	2	3	7
ITPKB	1		1		1				1														1																1	1		4	1	2	3	7
JMJD1C	1				1				1		1												1					1											1			4	2	1	3	7
KCNJ16	1				1		1		1														1					1		1												4	3	0	3	7
KLF11	1				1				1		1												1		1														1			4	2	1	3	7
KLHL9	1			1	1				1														1										1						1			4	1	2	3	7
KLRK1	1		1						1		1																					1				1		1				4	0	3	3	7
KRAS				1		1				1		1																	1							1			1			4	1	2	3	7
KRT15		1				1				1		1									1		1					1														4	3	0	3	7
LAIR1	1		1						1		1																					1		1				1				4	0	3	3	7
LAMA3	1		1					1	1														1		1			1														4	3	0	3	7
LAMC1	1		1					1	1														1					1													1	4	2	1	3	7
LAX1		1	1			1				1																							1			1			1			4	0	3	3	7
LDHA		1						1		1		1																	1			1									1	4	1	2	3	7
LEPROT	1		1		1				1														1					1											1			4	2	1	3	7
LIMK2	1		1				1		1																			1										1		1		4	1	2	3	7
LPP		1	1		1			1															1					1											1			4	2	1	3	7
LRP1	1		1		1				1														1					1				1										4	2	1	3	7
LRRC59		1				1		1		1														1		1						1										4	2	1	3	7
LSM14A	1					1		1	1														1													1			1			4	1	2	3	7
LSM8		1		1		1				1														1												1				1		4	1	2	3	7
LSS	1				1				1		1												1					1											1			4	2	1	3	7
LYRM9	1				1				1		1												1					1				1										4	2	1	3	7
MAF	1		1					1	1														1					1								1						4	2	1	3	7
MAGI1	1				1		1		1														1		1			1														4	3	0	3	7
MANF		1				1				1		1												1								1						1				4	1	2	3	7
MAP3K6	1		1		1				1												1		1					1														4	3	0	3	7
MAP4K4				1				1		1		1											1									1						1				4	1	2	3	7
MAP7D1	1		1					1	1														1					1				1										4	2	1	3	7
MATN2	1				1				1			1											1		1			1														4	3	0	3	7
MBD4				1		1		1				1																	1							1			1			4	1	2	3	7
MBNL2	1				1				1		1												1					1												1		4	2	1	3	7
MEF2A	1		1		1				1																				1			1									1	4	1	2	3	7
MEGF9	1							1	1		1																	1				1								1		4	1	2	3	7
METTL1		1				1				1		1												1													1	1				4	1	2	3	7
METTL13		1				1		1		1														1					1											1		4	2	1	3	7
MICALL2		1				1	1			1														1													1				1	4	1	2	3	7
MIS18A		1				1				1		1												1					1											1		4	2	1	3	7
MOAP1	1			1	1				1																			1				1				1						4	1	2	3	7
MPHOSPH10		1				1		1		1														1					1										1			4	2	1	3	7
MPP1	1		1						1		1																					1					1			1		4	0	3	3	7
MRPL49		1		1		1				1														1															1	1		4	1	2	3	7
MRPS27		1		1		1				1													1					1											1			4	2	1	3	7
MTIF2		1				1		1		1																			1				1						1			4	1	2	3	7
MYCL		1				1				1		1												1														1		1		4	1	2	3	7
MYLIP	1			1	1				1														1					1											1			4	2	1	3	7
MYO9A	1		1		1				1														1		1			1														4	3	0	3	7
NACC2	1				1				1		1												1					1												1		4	2	1	3	7
NDEL1	1		1		1				1														1					1												1		4	2	1	3	7
NDUFB3		1				1				1		1												1					1											1		4	2	1	3	7
NEK7	1				1				1		1												1																1	1		4	1	2	3	7
NEK9		1						1	1		1												1					1											1			4	2	1	3	7
NFKBIE		1	1			1				1														1					1										1			4	2	1	3	7
NHLRC2	1				1				1		1												1					1											1			4	2	1	3	7
NME2		1						1		1		1																				1						1			1	4	0	3	3	7
NR3C1	1				1			1	1														1		1			1														4	3	0	3	7
NRIP1		1				1		1		1																						1		1		1						4	0	3	3	7
NSF		1		1		1				1														1									1						1			4	1	2	3	7
NUP88	1			1		1				1													1													1			1			4	1	2	3	7
NXT2		1	1			1				1																			1										1		1	4	1	2	3	7
OR2A9P	1		1						1		1												1					1				1										4	2	1	3	7
OSBPL11	1		1					1	1																				1										1	1		4	1	2	3	7
OSBPL3		1				1	1			1														1								1						1				4	1	2	3	7
P2RY14	1				1				1		1												1					1				1										4	2	1	3	7
P4HA1		1	1			1				1														1								1									1	4	1	2	3	7
PAMR1	1				1		1		1												1		1					1														4	3	0	3	7
PANK4		1		1		1						1																1											1	1		4	1	2	3	7
PBX3				1	1				1		1																	1					1						1			4	1	2	3	7
PDGFC		1	1					1		1													1			1		1														4	3	0	3	7
PER2	1				1		1		1														1					1											1			4	2	1	3	7
PFDN5	1		1		1				1														1					1											1			4	2	1	3	7
PI3			1			1		1				1									1																	1		1		4	1	2	3	7
PIK3R4				1		1		1				1																1											1	1		4	1	2	3	7
PIP4K2B					1			1	1		1												1					1				1										4	2	1	3	7
PIP4K2C		1				1		1		1														1									1						1			4	1	2	3	7
PIP5K1A		1		1		1				1														1					1									1				4	2	1	3	7
PISD	1			1				1	1														1					1												1		4	2	1	3	7
PKD2	1		1		1				1														1					1								1						4	2	1	3	7
PMPCB		1		1		1				1													1																1	1		4	1	2	3	7
PNO1				1		1		1		1														1					1												1	4	2	1	3	7
PPIH		1				1				1		1												1								1							1			4	1	2	3	7
PPP1R12B	1				1				1		1												1		1			1														4	3	0	3	7
PPP2R3C	1						1		1		1												1													1			1			4	1	2	3	7
PPP3CC	1		1		1				1														1					1								1						4	2	1	3	7
PRCP	1		1					1	1																			1				1						1				4	1	2	3	7
PRDM1	1		1					1		1														1												1		1				4	1	2	3	7
PRDM4	1					1		1	1																							1				1				1		4	0	3	3	7
PRKRIP1		1		1		1				1																		1								1			1			4	1	2	3	7
PRPF3		1	1			1				1														1												1			1			4	1	2	3	7
PSIP1	1			1	1				1														1																1	1		4	1	2	3	7
PSMA6		1	1							1		1												1															1		1	4	1	2	3	7
PSMD10		1		1		1				1														1					1											1		4	2	1	3	7
PTGFR	1				1		1		1														1		1			1														4	3	0	3	7
PTGIS	1		1		1				1														1					1										1				4	2	1	3	7
PTGS2	1		1		1		1																		1			1												1		4	2	1	3	7
PUM2	1			1				1	1																								1						1	1		4	0	3	3	7
QPCT		1		1		1				1																						1						1		1		4	0	3	3	7
QSOX1		1	1						1		1													1				1													1	4	2	1	3	7
RAB3GAP2		1		1		1		1																									1						1	1		4	0	3	3	7
RALB	1		1					1	1														1					1				1										4	2	1	3	7
RALGPS1				1	1		1		1																			1					1						1			4	1	2	3	7
RAP1GDS1		1				1		1		1														1					1			1										4	2	1	3	7
RBL1		1				1		1		1														1					1										1			4	2	1	3	7
RBM28		1		1		1				1														1					1			1										4	2	1	3	7
RBM8A		1			1		1			1														1					1										1			4	2	1	3	7
RELN	1			1	1				1														1		1			1														4	3	0	3	7
RHBDF2			1			1				1		1												1								1						1				4	1	2	3	7
RIPK4		1		1		1				1											1							1										1				4	2	1	3	7
RNF34		1		1		1				1														1															1	1		4	1	2	3	7
RNF41	1			1	1				1														1										1						1			4	1	2	3	7
RPL13A	1		1							1		1											1					1											1			4	2	1	3	7
RTCA		1				1				1		1														1			1							1						4	2	1	3	7
RUNDC3B	1				1		1		1														1		1			1														4	3	0	3	7
RXRA	1		1		1				1														1					1											1			4	2	1	3	7
SAP30L	1		1		1					1																						1				1			1			4	0	3	3	7
SEC23A		1				1		1		1													1													1			1			4	1	2	3	7
SEMA3A			1			1	1			1													1															1			1	4	1	2	3	7
SERPINA1	1		1						1		1																	1				1						1				4	1	2	3	7
SERPINF1		1	1				1			1													1					1					1									4	2	1	3	7
SETD3	1				1				1		1												1					1				1										4	2	1	3	7
SETDB1		1		1		1				1														1															1	1		4	1	2	3	7
SF3A1	1			1				1	1														1					1											1			4	2	1	3	7
SGSM2					1		1		1		1												1					1											1			4	2	1	3	7
SLAMF7		1	1			1				1																			1							1		1				4	1	2	3	7
SLC25A12		1		1		1				1																		1					1						1			4	1	2	3	7
SLC25A17		1		1		1		1																1									1						1			4	1	2	3	7
SLC2A14	1		1						1		1													1								1						1				4	1	2	3	7
SLC35D2	1		1						1		1																	1					1						1			4	1	2	3	7
SLC52A2		1				1				1		1												1					1												1	4	2	1	3	7
SLC7A11		1				1		1		1														1					1									1				4	2	1	3	7
SLC7A8		1						1	1			1												1				1										1				4	2	1	3	7
SLC9A1		1	1		1				1															1				1												1		4	2	1	3	7
SMARCC2	1			1					1		1												1					1					1									4	2	1	3	7
SNX1	1		1					1	1														1					1												1		4	2	1	3	7
SNX5			1					1	1		1																	1											1	1		4	1	2	3	7
SOAT1		1			1					1	1													1					1							1						4	2	1	3	7
SP100	1		1						1		1												1													1			1			4	1	2	3	7
SP110	1		1						1		1																		1										1	1		4	1	2	3	7
SPON1	1		1		1				1														1					1									1					4	2	1	3	7
SPOP	1				1				1		1												1					1												1		4	2	1	3	7
STAT6	1		1		1				1														1					1											1			4	2	1	3	7
STEAP1		1				1				1		1											1					1										1				4	2	1	3	7
STX3	1		1						1		1													1														1		1		4	1	2	3	7
STX8	1		1		1				1														1					1				1										4	2	1	3	7
SULT1A3	1		1						1		1												1		1														1			4	2	1	3	7
SYNE3	1				1				1		1												1					1											1			4	2	1	3	7
TACC2	1				1				1		1												1		1			1														4	3	0	3	7
TAF5L		1				1		1		1														1					1										1			4	2	1	3	7
TAGLN	1		1		1				1														1					1											1			4	2	1	3	7
TBC1D5	1				1				1		1												1																1		1	4	1	2	3	7
TBPL1				1		1		1				1																	1							1				1		4	1	2	3	7
TBXAS1	1		1						1		1																	1				1						1				4	1	2	3	7
TCFL5		1		1				1		1																							1				1		1			4	0	3	3	7
TES	1		1			1				1																						1						1		1		4	0	3	3	7
TFB2M		1		1		1				1														1					1												1	4	2	1	3	7
TFIP11		1	1			1		1																				1								1			1			4	1	2	3	7
TIA1		1		1		1				1																			1				1						1			4	1	2	3	7
TIAL1		1				1		1		1														1					1							1						4	2	1	3	7
TLK1		1				1		1		1																							1			1			1			4	0	3	3	7
TLR7			1		1				1		1															1							1						1			4	1	2	3	7
TMBIM4			1		1				1		1												1					1											1			4	2	1	3	7
TMC6		1	1			1				1														1															1	1		4	1	2	3	7
TMEM127	1							1	1		1																	1								1			1			4	1	2	3	7
TMEM140	1		1						1		1												1					1												1		4	2	1	3	7
TMEM147		1				1		1		1														1								1									1	4	1	2	3	7
TMEM248		1				1				1		1												1												1			1			4	1	2	3	7
TMSB10			1			1		1		1														1					1										1			4	2	1	3	7
TMX4	1				1				1		1																	1								1			1			4	1	2	3	7
TOR1AIP2		1				1		1		1																							1						1		1	4	0	3	3	7
TPMT		1				1		1		1														1					1												1	4	2	1	3	7
TRAFD1		1	1			1				1														1												1				1		4	1	2	3	7
TRAK1	1				1		1		1														1					1											1			4	2	1	3	7
TRAM2			1			1		1	1														1										1								1	4	1	2	3	7
TREM1	1		1						1		1																		1			1						1				4	1	2	3	7
TRIM27		1		1		1				1														1															1	1		4	1	2	3	7
TRIM37		1		1		1				1														1					1										1			4	2	1	3	7
TRIM44	1				1				1		1																	1											1	1		4	1	2	3	7
TRIM8			1		1		1		1														1					1											1			4	2	1	3	7
TSC1	1				1				1		1												1					1											1			4	2	1	3	7
TTBK2	1				1		1		1														1						1										1			4	2	1	3	7
UBA2						1		1		1		1											1						1										1			4	2	1	3	7
UBA7	1						1		1		1												1					1				1										4	2	1	3	7
UBE2N				1		1				1		1												1												1					1	4	1	2	3	7
UBE2Q1		1				1		1		1														1								1							1			4	1	2	3	7
UCKL1		1		1		1				1														1									1						1			4	1	2	3	7
UFSP2	1				1		1		1														1					1												1		4	2	1	3	7
UGDH		1	1			1				1														1				1											1			4	2	1	3	7
UST	1		1		1				1														1					1				1										4	2	1	3	7
UTRN	1		1		1				1														1					1								1						4	2	1	3	7
VAMP4	1				1			1	1														1																1	1		4	1	2	3	7
VAMP5	1		1						1		1												1					1												1		4	2	1	3	7
VILL					1		1		1		1												1					1											1			4	2	1	3	7
VPS13D			1		1				1		1												1					1												1		4	2	1	3	7
WDR6				1	1		1		1																			1					1						1			4	1	2	3	7
XRCC5		1		1		1				1														1								1								1		4	1	2	3	7
ZDHHC13		1		1		1				1														1															1	1		4	1	2	3	7
ZFAND5	1				1				1		1												1					1				1										4	2	1	3	7
ZMYND11	1				1				1		1																	1					1						1			4	1	2	3	7
ZNF280D	1				1				1		1												1										1						1			4	1	2	3	7
ZNF330	1		1						1		1												1					1												1		4	2	1	3	7
AASS	1		1						1														1					1								1						3	2	1	3	6
ABCG1	1								1		1																		1				1						1			3	1	2	3	6
ABHD17A	1								1		1												1					1											1			3	2	1	3	6
ACBD3		1				1				1														1												1			1			3	1	2	3	6
ACSM5	1				1				1														1					1													1	3	2	1	3	6
ACTN1		1	1							1													1					1				1										3	2	1	3	6
ACTR5		1				1				1														1															1		1	3	1	2	3	6
ADA2	1				1				1															1				1				1										3	2	1	3	6
ADAT1		1				1				1														1															1	1		3	1	2	3	6
ADCY6					1		1		1														1					1										1				3	2	1	3	6
ADD3	1				1				1														1					1											1			3	2	1	3	6
ADM	1					1						1											1					1										1				3	2	1	3	6
ADSS		1				1				1														1					1											1		3	2	1	3	6
AHI1				1			1		1														1		1														1			3	2	1	3	6
AKAP2	1								1		1												1					1								1						3	2	1	3	6
AKR7A2		1		1						1																1													1		1	3	1	2	3	6
ALAD					1				1			1											1					1												1		3	2	1	3	6
ANKHD1		1		1							1																	1											1	1		3	1	2	3	6
ARAP2	1								1		1																					1				1				1		3	0	3	3	6
ARFGEF1		1				1				1														1															1	1		3	1	2	3	6
ARFGEF2		1						1		1																										1			1		1	3	0	3	3	6
ARFIP2		1					1			1														1				1										1				3	2	1	3	6
ARHGEF18	1		1						1															1								1							1			3	1	2	3	6
ASCL2		1				1						1												1					1										1			3	2	1	3	6
ASMTL	1				1				1														1					1											1			3	2	1	3	6
ASPH		1				1				1													1					1													1	3	2	1	3	6
ATG5						1		1		1														1								1				1						3	1	2	3	6
ATP1B1		1		1						1														1									1						1			3	1	2	3	6
ATP6V0A1				1					1		1																	1				1								1		3	1	2	3	6
ATP6V0B		1		1						1														1		1						1										3	2	1	3	6
ATP6V1F		1	1							1														1					1			1										3	2	1	3	6
BCAN		1		1	1																		1															1			1	3	1	2	3	6
BCHE	1				1				1														1		1			1														3	3	0	3	6
BCL2A1	1		1						1															1					1			1										3	2	1	3	6
BCL2L2	1				1				1														1					1													1	3	2	1	3	6
BEND5	1				1		1																1					1				1										3	2	1	3	6
BFAR			1			1			1														1						1										1			3	2	1	3	6
BIRC3	1		1							1																			1							1				1		3	1	2	3	6
BOLA2		1								1		1												1					1			1										3	2	1	3	6
BRAF	1				1			1																1					1									1				3	2	1	3	6
BTN3A2	1		1						1																				1			1								1		3	1	2	3	6
BZW1		1						1		1														1					1												1	3	2	1	3	6
C12orf10		1		1		1																	1					1											1			3	2	1	3	6
C1orf61				1		1				1													1					1										1				3	2	1	3	6
C20orf27	1					1			1														1						1			1										3	2	1	3	6
C3orf18		1		1	1																		1					1										1				3	2	1	3	6
CAMTA2	1								1		1												1					1											1			3	2	1	3	6
CAP1			1					1			1													1								1							1			3	1	2	3	6
CBR4		1		1					1																			1											1	1		3	1	2	3	6
CC2D1A		1		1		1																	1					1													1	3	2	1	3	6
CCDC93	1								1		1												1					1											1			3	2	1	3	6
CCL4	1								1		1													1												1		1				3	1	2	3	6
CCND2	1				1				1														1					1					1									3	2	1	3	6
CD200	1			1					1																			1					1						1			3	1	2	3	6
CD2AP		1				1				1																			1										1	1		3	1	2	3	6
CD300A	1		1			1																		1								1						1				3	1	2	3	6
CD46		1				1				1														1															1	1		3	1	2	3	6
CD63		1	1								1												1					1													1	3	2	1	3	6
CDC16				1					1		1												1										1						1			3	1	2	3	6
CDC42BPA		1		1							1												1						1											1		3	2	1	3	6
CDK12		1				1				1																							1						1		1	3	0	3	3	6
CDK14	1				1				1																								1						1	1		3	0	3	3	6
CDKL1	1				1		1																1						1				1									3	2	1	3	6
CDKN1A	1				1				1															1				1				1										3	2	1	3	6
CEBPZ	1		1			1																							1							1			1			3	1	2	3	6
CEMIP		1				1				1														1		1			1													3	3	0	3	6
CERK				1		1		1																				1								1				1		3	1	2	3	6
CES1	1		1						1														1					1				1										3	2	1	3	6
CHKB			1						1		1												1					1												1		3	2	1	3	6
CHP1	1				1				1														1					1				1										3	2	1	3	6
CLDN4		1				1				1														1														1			1	3	1	2	3	6
CLDN6		1				1				1														1														1			1	3	1	2	3	6
CLEC11A		1								1		1												1				1													1	3	2	1	3	6
CLK1	1				1				1														1					1											1			3	2	1	3	6
CLN3		1	1								1													1								1						1				3	1	2	3	6
CMTM6	1				1						1													1								1				1						3	1	2	3	6
COA1		1				1				1														1								1								1		3	1	2	3	6
COPS2				1		1		1															1					1													1	3	2	1	3	6
COQ2		1				1				1														1					1										1			3	2	1	3	6
COX7C		1	1							1													1					1											1			3	2	1	3	6
CREB3L2		1						1		1																		1					1						1			3	1	2	3	6
CREB5	1		1						1														1					1												1		3	2	1	3	6
CREG1			1					1	1														1									1									1	3	1	2	3	6
CRNKL1				1		1		1																1															1	1		3	1	2	3	6
CRYBG3	1				1				1														1					1										1				3	2	1	3	6
CRYL1					1				1		1												1					1				1										3	2	1	3	6
CSF2RB	1								1		1																					1						1		1		3	0	3	3	6
CSNK1G2				1		1		1																								1							1	1		3	0	3	3	6
CTSK		1	1							1													1					1													1	3	2	1	3	6
CXCL11	1		1							1														1					1										1			3	2	1	3	6
CXorf57	1			1					1																							1						1		1		3	0	3	3	6
CYCS		1		1						1														1					1			1										3	2	1	3	6
CYP7B1		1				1				1													1						1												1	3	2	1	3	6
DCLK1		1		1						1													1					1											1			3	2	1	3	6
DCTN3	1			1					1														1					1				1										3	2	1	3	6
DDX41		1				1				1														1									1						1			3	1	2	3	6
DDX50	1			1		1																	1										1						1			3	1	2	3	6
DEPTOR		1			1					1																		1									1	1				3	1	2	3	6
DGCR2		1				1		1																				1											1	1		3	1	2	3	6
DHRS3			1				1		1														1					1										1				3	2	1	3	6
DHRS7		1								1	1																	1				1				1						3	1	2	3	6
DNTTIP2	1			1				1															1													1					1	3	1	2	3	6
DOK4		1			1				1														1					1										1				3	2	1	3	6
DPF2				1		1		1																				1											1	1		3	1	2	3	6
DSE	1		1						1														1									1						1				3	1	2	3	6
DST	1				1				1														1		1			1														3	3	0	3	6
ECE1	1				1				1														1					1										1				3	2	1	3	6
ECHS1		1		1						1													1					1											1			3	2	1	3	6
EDRF1		1				1				1														1												1			1			3	1	2	3	6
EEF1AKMT3		1				1				1													1					1										1				3	2	1	3	6
EEF2				1	1			1															1					1													1	3	2	1	3	6
EGLN2	1		1						1														1					1												1		3	2	1	3	6
EHD3	1			1					1																			1								1				1		3	1	2	3	6
EIF4E		1								1		1												1					1												1	3	2	1	3	6
EIF5A2	1					1		1															1						1							1						3	2	1	3	6
EIF6		1								1		1												1								1									1	3	1	2	3	6
ELOC						1				1		1												1					1												1	3	2	1	3	6
EPB41L3	1							1	1														1					1				1										3	2	1	3	6
EPHB6	1		1						1														1					1				1										3	2	1	3	6
EPN2	1						1		1																			1										1		1		3	1	2	3	6
ERBB3		1	1							1														1				1										1				3	2	1	3	6
ETNK1				1		1				1														1					1									1				3	2	1	3	6
FAAH		1			1		1																	1				1													1	3	2	1	3	6
FAM110D	1				1				1														1		1			1														3	3	0	3	6
FAM111A		1	1						1															1															1	1		3	1	2	3	6
FAM13A		1					1			1													1					1												1		3	2	1	3	6
FAM3C		1		1						1																							1						1	1		3	0	3	3	6
FAM49B		1				1				1														1					1			1										3	2	1	3	6
FAT2		1				1						1											1					1					1									3	2	1	3	6
FBXO34		1				1				1														1				1												1		3	2	1	3	6
FDFT1			1					1	1																			1											1		1	3	1	2	3	6
FGF7	1				1				1														1					1													1	3	2	1	3	6
FKBP11		1				1				1																						1						1		1		3	0	3	3	6
FTO	1				1				1														1					1											1			3	2	1	3	6
GABARAPL2	1				1				1																			1											1	1		3	1	2	3	6
GCA	1		1								1																		1			1								1		3	1	2	3	6
GEMIN2		1				1				1																			1				1							1		3	1	2	3	6
GEMIN4		1				1				1													1		1							1										3	2	1	3	6
GGTLC1	1								1		1													1				1													1	3	2	1	3	6
GPBP1L1		1		1	1																			1				1											1			3	2	1	3	6
GRK3					1				1		1												1									1							1			3	1	2	3	6
GSTK1			1		1						1												1					1				1										3	2	1	3	6
GZMK	1		1							1														1												1		1				3	1	2	3	6
HACD1	1								1		1												1													1			1			3	1	2	3	6
HADHA	1							1	1														1					1											1			3	2	1	3	6
HDAC7	1				1				1														1					1					1									3	2	1	3	6
HERC3	1				1				1														1					1											1			3	2	1	3	6
HEXA		1	1					1																		1		1													1	3	2	1	3	6
HIRA						1		1		1													1																1	1		3	1	2	3	6
HIST2H2AA3		1								1		1												1								1						1				3	1	2	3	6
HLA-DMB			1						1		1													1								1							1			3	1	2	3	6
HLA-DQA1	1		1						1															1															1	1		3	1	2	3	6
HLA-DRB4			1						1		1													1												1			1			3	1	2	3	6
HLA-F			1						1		1													1					1											1		3	2	1	3	6
HNRNPC		1								1		1												1					1										1			3	2	1	3	6
HOXA4	1		1						1														1					1										1				3	2	1	3	6
HPS4		1				1				1																		1											1	1		3	1	2	3	6
HYMAI	1				1				1														1		1			1														3	3	0	3	6
ICAM3	1		1							1																		1				1								1		3	1	2	3	6
IFIT2	1		1					1																					1							1				1		3	1	2	3	6
IL7			1				1		1														1										1						1			3	1	2	3	6
ILKAP				1		1		1															1					1											1			3	2	1	3	6
IMPA1				1		1	1																	1					1										1			3	2	1	3	6
IMPDH2		1				1				1																		1				1					1					3	1	2	3	6
INHBA		1						1			1													1		1			1													3	3	0	3	6
INPP1	1			1					1														1					1											1			3	2	1	3	6
IRS1			1			1				1													1					1				1										3	2	1	3	6
IRX5		1					1			1														1				1													1	3	2	1	3	6
ITSN1					1				1		1												1					1										1				3	2	1	3	6
KCTD7		1			1						1												1					1											1			3	2	1	3	6
KHDC4		1				1				1														1									1						1			3	1	2	3	6
KIAA1109	1				1				1														1					1											1			3	2	1	3	6
KIF13A	1				1				1														1					1												1		3	2	1	3	6
KLF15	1		1		1																		1						1												1	3	2	1	3	6
KLF3	1				1					1																			1			1						1				3	1	2	3	6
KLF5			1							1		1									1																	1		1		3	1	2	3	6
KLK10	1		1						1												1		1					1														3	3	0	3	6
KLRD1	1		1						1																											1		1		1		3	0	3	3	6
LAMA5			1			1			1																			1					1								1	3	1	2	3	6
LANCL1	1			1					1														1					1								1						3	2	1	3	6
LARP6	1			1					1														1					1										1				3	2	1	3	6
LDOC1		1		1						1																						1						1		1		3	0	3	3	6
LILRB3	1		1						1															1					1			1										3	2	1	3	6
LPCAT1								1	1		1													1															1	1		3	1	2	3	6
LRBA		1		1						1														1															1	1		3	1	2	3	6
LYPLA1		1				1				1														1															1		1	3	1	2	3	6
LYRM1					1				1		1												1													1			1			3	1	2	3	6
LYSMD4	1								1		1												1					1				1										3	2	1	3	6
MAGEH1	1			1					1														1					1												1		3	2	1	3	6
MAN2A1		1				1				1																		1								1			1			3	1	2	3	6
MAN2C1	1				1				1														1					1													1	3	2	1	3	6
MAPRE1						1		1		1														1								1									1	3	1	2	3	6
MARCKS				1		1		1																					1			1						1				3	1	2	3	6
MAT2B			1		1				1																			1											1	1		3	1	2	3	6
MATN3	1		1						1																	1			1										1			3	2	1	3	6
[truncated: 19,681 more rows]

## Sheet: COMUNES
	GSE19804		GSE108055		E-MTAB-5231		E-MTAB-3950		GSE10072		GSE3268		GSE52248.		GSE70089.		GSE81089.		GSE84776.		GSE10797		GSE21422		GSE26910		GSE27562	GSE3744		GSE5764		GSE22529		GSE26725		GSE5788		GSE6691		GSE9476		10	6	5	11
GENE	DOWN	UP	DOWN	UP	DOWN	UP	DOWN	UP	DOWN	UP	DOWN	UP	DOWN	UP	DOWN	UP	DOWN	UP	DOWN	UP	DOWN	UP	DOWN	UP	DOWN	UP	UP	DOWN	UP	DOWN	UP	DOWN	UP	DOWN	UP	DOWN	UP	DOWN	UP	DOWN	UP	LC	BC	LK	OC	TOTAL
ACACB	1		1		1		1		1		1		1		1		1		1				1		1			1												1		10	3	1	4	14
BIRC5		1		1		1		1		1		1		1		1		1		1				1					1								1	1				10	2	2	4	14
FHL1	1		1		1		1		1		1		1		1		1		1				1		1			1								1						10	3	1	4	14
CNN1	1		1		1		1		1		1		1		1		1		1				1					1		1												10	3	0	3	13
DEPDC1		1		1		1		1		1		1		1		1		1		1				1					1											1		10	2	1	3	13
EXO1		1		1		1		1		1		1		1		1		1		1				1					1									1				10	2	1	3	13
FABP4	1		1		1		1		1		1		1		1		1		1				1		1			1														10	3	0	3	13
FAM107A	1		1		1		1		1		1		1		1		1		1				1		1			1														10	3	0	3	13
SOX17	1		1		1		1		1		1		1		1		1		1				1		1			1														10	3	0	3	13
SOX4		1		1		1		1		1		1		1		1		1		1				1								1						1				10	1	2	3	13
ABCA8	1		1		1		1		1		1		1		1		1		1				1					1														10	2	0	2	12
ACADL	1		1		1		1		1		1		1		1		1		1				1					1														10	2	0	2	12
ASPA	1		1		1		1		1		1		1		1		1		1				1					1														10	2	0	2	12
CAB39L	1		1		1		1		1		1		1		1		1		1				1					1														10	2	0	2	12
FHL5	1		1		1		1		1		1		1		1		1		1				1					1														10	2	0	2	12
LAD1		1	1			1		1		1		1		1		1		1		1				1																	1	10	1	1	2	12
PDK4	1		1		1		1		1		1		1		1		1		1				1					1														10	2	0	2	12
PIP5K1B	1		1		1		1		1		1		1		1		1		1									1												1		10	1	1	2	12
UBE2C		1		1		1		1		1		1		1		1		1		1				1					1													10	2	0	2	12
ADAMTS8	1		1		1		1		1		1		1		1		1		1									1														10	1	0	1	11
ZBTB16	1		1		1		1		1		1				1		1		1		1		1		1			1				1						1		1		9	4	3	7	16
ACTG2	1		1		1		1		1		1				1		1		1		1		1					1		1											1	9	4	1	5	14
CORO2B	1				1		1		1		1		1		1		1		1				1					1				1		1				1				9	2	3	5	14
DUSP1	1		1		1		1		1		1		1				1		1		1				1			1				1								1		9	3	2	5	14
HBB	1		1		1		1		1		1		1		1		1						1					1				1					1			1		9	2	3	5	14
ITM2A	1		1		1		1		1		1		1				1		1		1		1		1			1								1						9	4	1	5	14
KLF4	1		1		1		1		1		1		1		1		1				1		1		1			1				1										9	4	1	5	14
TAL1	1		1		1				1		1		1		1		1		1				1		1			1										1		1		9	3	2	5	14
COL10A1		1		1		1		1		1		1		1		1		1				1		1		1			1													9	4	0	4	13
F8	1		1		1		1		1		1		1		1		1						1					1					1								1	9	2	2	4	13
FZD4	1		1		1		1		1		1		1				1		1				1		1			1										1				9	3	1	4	13
LYVE1	1		1		1		1		1		1				1		1		1				1		1			1										1				9	3	1	4	13
MCM4		1		1		1		1		1		1		1				1		1				1					1								1	1				9	2	2	4	13
MMP11		1		1		1		1		1		1		1				1		1				1		1			1				1									9	3	1	4	13
SDC1		1	1			1		1		1		1		1				1		1				1		1			1									1				9	3	1	4	13
TCEAL2	1			1	1		1		1		1		1				1		1				1					1								1				1		9	2	2	4	13
ADH1B	1		1		1		1		1		1		1		1		1						1		1			1														9	3	0	3	12
CCNA2		1		1		1		1		1		1				1		1		1				1					1									1				9	2	1	3	12
CCNB2		1		1		1		1		1		1				1		1		1				1					1									1				9	2	1	3	12
CDC20		1		1		1		1		1		1				1		1		1				1					1									1				9	2	1	3	12
CDCA3		1		1		1		1		1		1				1		1		1				1					1									1				9	2	1	3	12
CDCA8		1		1		1		1		1		1				1		1		1				1					1									1				9	2	1	3	12
CLDN18	1		1		1		1		1		1		1		1		1						1										1					1				9	1	2	3	12
EMCN	1		1		1		1		1		1		1				1		1				1		1			1														9	3	0	3	12
FOXM1		1		1		1		1		1		1				1		1		1				1					1									1				9	2	1	3	12
HMMR		1		1		1		1		1		1		1				1		1				1					1									1				9	2	1	3	12
ITIH5	1				1		1		1		1		1		1		1		1				1		1			1														9	3	0	3	12
JAM2	1		1		1		1		1		1		1				1		1				1					1												1		9	2	1	3	12
LDB2	1		1		1		1		1		1		1				1		1				1		1			1														9	3	0	3	12
MAD2L1		1		1		1		1		1		1				1		1		1				1		1			1													9	3	0	3	12
MELK		1		1		1		1		1		1				1		1		1				1					1									1				9	2	1	3	12
MMRN1	1		1		1		1		1		1				1		1		1				1		1			1														9	3	0	3	12
PBK		1		1		1		1		1		1				1		1		1				1					1											1		9	2	1	3	12
PLK1		1		1		1		1		1		1				1		1		1				1					1								1					9	2	1	3	12
PPAT		1		1		1		1		1		1				1		1		1									1				1						1			9	1	2	3	12
RRM2		1		1		1		1		1		1				1		1		1				1					1									1				9	2	1	3	12
SLC7A5		1		1		1		1		1		1				1		1		1				1					1									1				9	2	1	3	12
SLIT3	1		1		1				1		1		1		1		1		1				1					1										1				9	2	1	3	12
AGTR1	1		1		1				1		1		1		1		1		1				1					1														9	2	0	2	11
ANGPT1	1		1		1		1		1		1		1		1		1						1					1														9	2	0	2	11
BUB1B		1		1		1		1		1		1				1		1		1				1					1													9	2	0	2	11
BZW2		1		1		1		1		1		1		1				1		1				1								1										9	1	1	2	11
CAV2	1		1		1			1	1		1		1		1		1						1					1														9	2	0	2	11
CCNB1		1		1		1		1		1		1				1		1		1				1					1													9	2	0	2	11
CCNE1		1		1		1		1		1		1				1		1		1				1					1													9	2	0	2	11
CCT3		1		1		1		1		1		1		1				1		1				1					1													9	2	0	2	11
CEP55		1		1		1		1		1		1				1		1		1				1					1													9	2	0	2	11
CHEK1		1		1		1		1		1		1				1		1		1				1					1													9	2	0	2	11
CYP4B1	1		1		1		1		1		1				1		1		1				1					1														9	2	0	2	11
FBLN5	1		1		1		1		1		1				1		1		1				1					1														9	2	0	2	11
GPD1L	1		1		1		1		1		1				1		1		1									1												1		9	1	1	2	11
GPX3	1		1		1		1		1		1				1		1		1				1					1														9	2	0	2	11
IFT57	1		1		1		1		1		1				1		1		1														1						1			9	0	2	2	11
KIF11		1		1		1		1		1		1				1		1		1				1					1													9	2	0	2	11
KIF14		1		1		1		1		1		1				1		1		1				1					1													9	2	0	2	11
KIF20A		1		1		1		1		1		1				1		1		1				1					1													9	2	0	2	11
KIF4A		1		1		1		1		1		1				1		1		1				1					1													9	2	0	2	11
MFAP4	1		1		1		1		1		1		1		1		1						1					1														9	2	0	2	11
MMP1		1		1		1		1		1		1				1		1		1				1					1													9	2	0	2	11
NCAPG		1		1		1		1		1		1				1		1		1				1					1													9	2	0	2	11
NEK2		1		1		1		1		1		1				1		1		1				1					1													9	2	0	2	11
PAICS		1		1		1		1		1		1		1		1		1						1					1													9	2	0	2	11
PLCE1	1		1		1		1		1		1		1				1		1				1																		1	9	1	1	2	11
SEMA5A	1		1		1		1		1		1		1				1		1									1										1				9	1	1	2	11
SLC1A1	1		1		1		1		1		1				1		1		1																		1	1				9	0	2	2	11
TMEM47	1		1		1		1		1		1		1				1		1				1					1														9	2	0	2	11
TOP2A		1		1		1		1		1		1		1		1		1						1					1													9	2	0	2	11
TPX2		1		1		1		1		1		1				1		1		1				1					1													9	2	0	2	11
TROAP		1		1		1		1		1		1				1		1		1				1					1													9	2	0	2	11
ZWINT		1		1		1		1		1		1				1		1		1				1					1													9	2	0	2	11
ADAMTSL3	1		1		1		1		1		1		1		1		1						1																			9	1	0	1	10
CLIC5	1		1		1		1		1		1		1		1		1						1																			9	1	0	1	10
ITGA8	1		1		1		1		1				1		1		1		1																			1				9	0	1	1	10
PSAT1		1		1		1		1		1		1		1				1		1									1													9	1	0	1	10
RAD54L		1		1		1		1		1		1				1		1		1									1													9	1	0	1	10
SCGB1A1	1		1		1		1		1		1		1				1		1					1																		9	1	0	1	10
CFD	1		1		1		1		1		1						1		1				1		1			1				1						1			1	8	3	3	6	14
SYNM	1				1				1		1		1		1		1		1		1		1		1			1		1								1				8	5	1	6	14
CAV1	1		1		1				1		1		1		1		1				1		1		1			1										1				8	4	1	5	13
CXCL12	1		1		1		1		1		1						1		1				1		1			1										1		1		8	3	2	5	13
ENO2		1		1		1		1		1		1						1		1				1									1			1			1	1		8	1	4	5	13
GNG11	1		1		1		1		1		1		1				1						1		1			1								1				1		8	3	2	5	13
PTGER4	1		1		1		1		1		1				1		1						1		1			1				1							1			8	3	2	5	13
SELENBP1	1		1		1		1		1		1				1		1						1		1			1										1		1		8	3	2	5	13
ADRB2	1		1		1		1		1		1		1				1						1					1								1			1			8	2	2	4	12
AOX1	1		1		1		1		1		1						1		1				1		1			1										1				8	3	1	4	12
ASF1B		1		1		1		1		1		1						1		1				1					1								1			1		8	2	2	4	12
C1orf115	1		1		1			1	1		1		1				1						1		1			1										1				8	3	1	4	12
CD36	1		1		1				1		1		1		1		1						1		1			1				1										8	3	1	4	12
CKAP4		1		1		1		1		1		1						1		1				1					1				1							1		8	2	2	4	12
COL11A1		1		1		1		1		1		1				1		1				1		1		1			1													8	4	0	4	12
EIF2AK1		1		1		1		1		1		1		1				1						1					1										1	1		8	2	2	4	12
GIMAP6	1		1		1		1		1		1		1				1						1					1								1				1		8	2	2	4	12
GPRASP1	1			1	1		1		1		1						1		1				1					1											1	1		8	2	2	4	12
GYPC	1		1		1				1		1		1		1		1						1					1				1								1		8	2	2	4	12
HLF	1				1		1		1		1				1		1		1		1		1					1												1		8	3	1	4	12
IL33	1		1		1				1		1		1				1		1				1		1			1											1			8	3	1	4	12
LMO2	1				1		1		1		1		1				1		1				1					1				1						1				8	2	2	4	12
MCM2		1		1		1		1		1		1						1		1				1					1								1		1			8	2	2	4	12
MMRN2	1		1		1				1		1		1		1		1						1		1			1													1	8	3	1	4	12
NME4		1		1		1		1		1		1						1		1				1					1			1						1				8	2	2	4	12
PCNA		1		1		1		1		1		1						1		1				1		1			1										1			8	3	1	4	12
PDIA6		1		1		1		1		1		1						1		1				1					1			1						1				8	2	2	4	12
PIK3R1	1		1		1		1		1				1		1		1				1		1					1								1						8	3	1	4	12
PRC1		1		1		1		1		1		1						1		1				1					1				1						1			8	2	2	4	12
SELP	1		1		1		1		1		1				1		1						1					1					1						1			8	2	2	4	12
SMARCB1		1		1		1		1		1		1						1		1				1									1						1		1	8	1	3	4	12
SULF1		1		1		1		1		1		1				1		1				1		1		1			1													8	4	0	4	12
TIMELESS		1		1		1		1		1		1						1		1				1					1				1						1			8	2	2	4	12
TNXB	1						1		1		1		1		1		1		1				1		1			1										1				8	3	1	4	12
VIPR1	1		1		1		1		1		1		1				1						1		1			1					1									8	3	1	4	12
ACTL6A		1		1		1		1		1		1						1		1				1					1										1			8	2	1	3	11
AOC3	1		1		1				1		1		1		1		1						1		1			1														8	3	0	3	11
ARHGAP6	1				1		1		1		1		1				1		1				1		1			1														8	3	0	3	11
AURKA		1		1		1		1		1		1						1		1				1					1									1				8	2	1	3	11
CAD		1		1		1		1		1		1						1		1				1													1		1			8	1	2	3	11
CDCA4		1		1		1		1		1		1						1		1				1					1			1										8	2	1	3	11
CENPF		1		1		1		1		1		1				1		1						1					1									1				8	2	1	3	11
CHRDL1	1				1		1		1		1				1		1		1				1					1										1				8	2	1	3	11
CIT		1		1		1		1		1				1				1		1				1					1								1					8	2	1	3	11
COL5A2		1		1		1		1		1		1				1		1						1					1		1											8	3	0	3	11
ENG	1		1		1				1		1		1		1		1						1					1				1										8	2	1	3	11
ENO1		1	1			1		1		1		1						1		1												1					1				1	8	0	3	3	11
EPAS1	1		1		1		1		1		1		1				1						1		1			1														8	3	0	3	11
ERCC6L		1		1		1		1		1						1		1		1				1					1									1				8	2	1	3	11
ESPL1		1		1		1		1		1		1						1		1				1					1									1				8	2	1	3	11
FMO2	1		1		1				1		1		1		1		1						1					1										1				8	2	1	3	11
GPM6A	1		1		1				1		1		1		1		1						1										1						1			8	1	2	3	11
HJURP		1				1		1		1		1				1		1		1				1					1									1				8	2	1	3	11
HPRT1		1		1		1		1		1		1						1		1				1					1										1			8	2	1	3	11
HSPB6	1		1		1		1		1		1				1		1						1					1										1				8	2	1	3	11
ID4	1			1	1				1		1		1				1		1		1		1					1														8	3	0	3	11
IL18RAP	1		1		1		1		1		1						1		1																	1		1		1		8	0	3	3	11
KIF15		1		1		1		1		1		1						1		1				1					1										1			8	2	1	3	11
KIF2C		1		1		1		1		1		1						1		1				1					1								1					8	2	1	3	11
KIFC1		1		1		1				1		1				1		1		1				1					1									1				8	2	1	3	11
KLF2	1		1		1		1		1		1						1		1				1		1			1														8	3	0	3	11
LAMP3	1		1		1			1	1		1				1		1							1					1									1				8	2	1	3	11
LAPTM4B		1		1		1		1		1		1		1				1						1					1									1				8	2	1	3	11
LRP8		1		1		1		1		1		1						1		1				1					1												1	8	2	1	3	11
LRRC15		1	1			1		1		1						1		1		1				1		1			1													8	3	0	3	11
LTBP4	1		1		1		1		1		1				1		1						1		1			1														8	3	0	3	11
MARCKSL1		1		1		1		1		1		1				1		1						1								1					1					8	1	2	3	11
MCM6		1		1		1		1		1		1						1		1				1					1										1			8	2	1	3	11
MKI67		1		1		1		1		1		1				1		1						1					1									1				8	2	1	3	11
MNDA	1		1		1		1		1		1				1		1							1		1						1										8	2	1	3	11
MYH10	1		1		1				1		1		1		1		1						1					1												1		8	2	1	3	11
NDC80		1		1		1		1		1		1						1		1				1					1							1						8	2	1	3	11
NETO2		1		1		1		1		1		1						1		1				1									1						1			8	1	2	3	11
PALMD	1				1		1		1		1		1				1		1				1		1			1														8	3	0	3	11
PDE2A	1				1		1		1		1				1		1		1				1		1			1														8	3	0	3	11
PDZD2	1		1		1		1		1		1				1		1						1					1												1		8	2	1	3	11
PLOD2		1		1		1		1		1		1				1		1								1			1											1		8	2	1	3	11
PRX	1		1		1		1		1		1		1				1											1								1		1				8	1	2	3	11
RAI2	1				1		1		1		1				1		1		1				1					1								1						8	2	1	3	11
RAMP3	1		1		1		1		1		1		1				1						1					1										1				8	2	1	3	11
RFC2		1		1		1		1		1		1						1		1				1					1			1										8	2	1	3	11
ROBO4	1		1		1				1		1		1		1		1						1					1										1				8	2	1	3	11
RSRC1		1		1		1		1		1		1						1		1									1							1			1			8	1	2	3	11
RTN1	1			1	1				1		1				1		1		1				1					1												1		8	2	1	3	11
S1PR1	1				1		1		1		1		1		1		1						1					1				1										8	2	1	3	11
SHMT2		1		1		1		1		1		1						1		1				1									1						1			8	1	2	3	11
SKP2		1		1		1		1		1		1						1		1									1										1	1		8	1	2	3	11
SLC12A8		1				1		1		1		1				1		1		1				1														1			1	8	1	2	3	11
SPARCL1	1		1		1		1		1		1				1		1				1		1					1														8	3	0	3	11
SPP1		1				1		1		1		1		1		1		1						1					1												1	8	2	1	3	11
SRM		1		1		1		1		1		1						1		1				1								1						1				8	1	2	3	11
SRPK1		1		1		1		1		1		1				1		1						1					1											1		8	2	1	3	11
SRPX	1		1		1				1		1		1		1		1						1		1			1														8	3	0	3	11
STARD8	1		1		1				1		1		1		1		1						1					1										1				8	2	1	3	11
STMN1		1		1		1		1		1		1						1		1				1					1										1			8	2	1	3	11
TK1		1		1		1		1		1		1						1		1				1					1									1				8	2	1	3	11
TMEM132A		1				1		1		1		1				1		1		1				1					1									1				8	2	1	3	11
TYMS		1		1		1		1		1		1						1		1				1					1									1				8	2	1	3	11
UCK2		1		1		1		1		1		1						1		1				1		1			1													8	3	0	3	11
VWF	1		1		1				1		1		1		1		1						1					1										1				8	2	1	3	11
ACVRL1	1		1		1		1		1		1		1				1						1					1														8	2	0	2	10
ALDH18A1		1				1		1		1		1		1		1		1						1									1									8	1	1	2	10
APEX1		1		1		1		1		1		1						1		1								1											1			8	1	1	2	10
ASPM		1		1		1		1		1		1				1		1						1					1													8	2	0	2	10
AURKB		1		1		1				1		1				1		1		1				1					1													8	2	0	2	10
BUB1		1		1		1		1		1						1		1		1				1					1													8	2	0	2	10
CA4	1		1		1				1		1		1		1		1						1					1														8	2	0	2	10
CD33	1		1		1		1		1		1				1		1															1									1	8	0	2	2	10
CDH5	1		1		1		1		1		1		1				1						1					1														8	2	0	2	10
CDKN3		1		1		1		1		1		1						1		1				1					1													8	2	0	2	10
CDO1	1		1		1				1		1		1				1		1				1					1														8	2	0	2	10
CENPA		1		1		1				1		1				1		1		1				1					1													8	2	0	2	10
CENPE		1		1		1		1		1		1						1		1				1					1													8	2	0	2	10
CENPM		1		1		1		1		1		1						1		1				1					1													8	2	0	2	10
COX6B1		1	1			1		1		1		1						1		1				1								1										8	1	1	2	10
CYB5A	1		1		1		1		1		1				1		1						1					1														8	2	0	2	10
DENND2A	1		1		1				1		1		1		1		1						1		1																	8	2	0	2	10
DLGAP5		1				1		1		1		1				1		1		1				1					1													8	2	0	2	10
DNAI1	1		1		1		1		1				1				1		1					1														1				8	1	1	2	10
DPEP2	1		1		1				1		1		1		1		1																1						1			8	0	2	2	10
DTL		1		1		1		1		1		1						1		1				1					1													8	2	0	2	10
E2F8		1		1		1	1			1						1		1	1					1					1													8	2	0	2	10
EIF4EBP1		1		1		1		1		1		1						1		1									1			1										8	1	1	2	10
ENPP4	1			1	1		1		1		1						1		1																				1	1		8	0	2	2	10
FAM184A	1				1		1		1		1				1		1		1				1		1																	8	2	0	2	10
FANCI		1		1		1		1		1		1						1		1				1					1													8	2	0	2	10
FEN1		1		1		1		1		1		1						1		1				1					1													8	2	0	2	10
FEZ1	1		1		1			1	1		1		1				1						1					1														8	2	0	2	10
FGR	1		1		1				1		1		1		1		1																1						1			8	0	2	2	10
FOLR1	1		1		1		1		1		1				1		1				1									1												8	2	0	2	10
GINS1		1				1		1		1		1				1		1		1				1					1													8	2	0	2	10
GINS2		1		1		1		1		1		1						1		1				1					1													8	2	0	2	10
GINS3		1		1		1		1		1		1						1		1									1									1				8	1	1	2	10
GIPC2	1		1		1		1		1		1						1		1				1		1																	8	2	0	2	10
GPD1	1		1		1				1		1				1		1		1				1					1														8	2	0	2	10
GPX2		1		1		1		1		1		1						1		1								1													1	8	1	1	2	10
ITGB4		1	1			1		1		1		1						1		1					1			1														8	2	0	2	10
KIF23		1		1		1		1		1		1						1		1				1					1													8	2	0	2	10
LEPR	1		1		1		1		1		1						1		1				1					1														8	2	0	2	10
LIMS2	1		1		1				1		1		1		1		1						1					1														8	2	0	2	10
LMNB1		1		1		1		1		1		1						1		1				1					1													8	2	0	2	10
LMNB2		1		1		1		1		1		1						1		1				1					1													8	2	0	2	10
LMOD1	1		1		1		1		1		1				1		1						1					1														8	2	0	2	10
LSR		1		1		1		1		1		1						1		1				1															1			8	1	1	2	10
MCM10		1		1		1		1		1		1						1		1				1					1													8	2	0	2	10
MCM3		1		1		1		1		1		1						1		1				1					1													8	2	0	2	10
MDH2		1		1		1		1		1		1						1		1				1								1										8	1	1	2	10
MEIS1	1		1		1		1		1		1		1				1						1					1														8	2	0	2	10
MGP	1		1		1		1		1		1				1		1						1					1														8	2	0	2	10
MMP14		1				1		1		1		1				1		1		1									1												1	8	1	1	2	10
MTHFD2		1		1		1		1		1		1						1		1				1					1													8	2	0	2	10
MYBL2		1				1		1		1		1				1		1		1				1					1													8	2	0	2	10
MYCT1	1		1		1		1		1				1				1		1				1																	1		8	1	1	2	10
MYL9	1		1		1				1		1		1		1		1						1					1														8	2	0	2	10
NPR3	1		1		1				1		1		1				1			1			1															1				8	1	1	2	10
NR2F1	1		1		1		1		1		1				1		1								1			1														8	2	0	2	10
NUSAP1		1		1		1		1		1		1						1		1				1					1													8	2	0	2	10
OIP5		1		1		1		1		1		1						1		1				1					1													8	2	0	2	10
PCOLCE2	1		1		1				1		1				1		1		1				1					1														8	2	0	2	10
PKNOX2	1		1		1				1		1		1		1		1						1															1				8	1	1	2	10
PLAC8	1		1		1		1		1				1				1		1															1		1						8	0	2	2	10
PLAU		1	1			1		1		1						1		1		1				1					1													8	2	0	2	10
PLLP	1		1		1		1		1		1				1		1											1										1				8	1	1	2	10
PODXL	1		1		1		1		1		1		1				1				1		1																			8	2	0	2	10
PRAME		1				1		1		1		1				1		1		1									1												1	8	1	1	2	10
PRPF19		1		1		1		1		1		1						1		1				1															1			8	1	1	2	10
PSMD2		1		1		1		1		1		1						1		1				1					1													8	2	0	2	10
PTTG1		1		1		1		1		1		1						1		1				1					1													8	2	0	2	10
RACGAP1		1		1		1		1		1		1						1		1				1					1													8	2	0	2	10
RAD51AP1		1		1		1		1		1		1						1		1				1					1													8	2	0	2	10
RASIP1	1		1		1				1		1		1		1		1						1					1														8	2	0	2	10
RBMS3	1		1		1		1		1		1				1		1						1					1														8	2	0	2	10
RCC1		1				1		1		1		1				1		1		1				1					1													8	2	0	2	10
RFC4		1		1		1		1		1		1						1		1				1					1													8	2	0	2	10
RFWD3		1		1		1		1		1		1						1		1				1					1													8	2	0	2	10
RGN	1		1		1		1		1		1						1		1				1					1														8	2	0	2	10
RNASEH2A		1		1		1		1		1		1						1		1				1					1													8	2	0	2	10
SAMHD1	1		1		1		1		1		1				1		1															1						1				8	0	2	2	10
SLC15A2	1		1		1		1		1		1						1		1					1																	1	8	1	1	2	10
SLC19A3	1		1		1				1		1		1		1		1						1					1														8	2	0	2	10
SPAG5		1		1				1		1		1				1		1		1				1					1													8	2	0	2	10
SPINT2		1		1		1		1		1		1		1				1						1															1			8	1	1	2	10
STARD13	1		1		1		1		1		1		1				1						1					1														8	2	0	2	10
TFAP2C		1				1		1		1		1		1				1		1								1													1	8	1	1	2	10
TMC5		1	1		1		1			1	1			1					1					1				1														8	2	0	2	10
TMEM100	1		1		1		1		1		1		1				1						1					1														8	2	0	2	10
TMEM106C		1		1		1		1		1		1						1		1				1														1				8	1	1	2	10
TTK		1		1		1		1		1		1						1		1				1					1													8	2	0	2	10
UCHL1		1		1		1		1		1		1						1		1		1																		1		8	1	1	2	10
UNG		1		1		1		1		1		1						1		1									1										1			8	1	1	2	10
WDR12		1		1		1		1		1		1						1		1				1					1													8	2	0	2	10
WISP2	1		1		1				1		1		1		1				1				1					1														8	2	0	2	10
ZWILCH		1		1		1		1		1		1						1		1				1					1													8	2	0	2	10
ABCA12		1		1		1		1		1		1						1		1				1																		8	1	0	1	9
ADRB1	1		1		1				1		1		1				1		1				1																			8	1	0	1	9
AQP4	1		1		1		1		1		1				1		1						1																			8	1	0	1	9
CA2	1		1		1				1		1		1		1		1											1														8	1	0	1	9
CA9		1		1		1				1		1				1		1		1			1																			8	1	0	1	9
CASQ2	1				1				1		1		1		1		1		1				1																			8	1	0	1	9
CCNF		1		1		1		1		1				1				1		1				1																		8	1	0	1	9
CDC6		1				1		1		1		1				1		1		1									1													8	1	0	1	9
CHAF1A		1		1		1		1		1		1						1		1									1													8	1	0	1	9
CLEC1A	1		1		1				1		1		1		1		1						1																			8	1	0	1	9
CPA3	1		1		1		1		1		1				1		1											1														8	1	0	1	9
CYC1		1		1		1		1		1		1						1		1												1										8	0	1	1	9
DLX5		1		1		1		1		1		1						1		1				1																		8	1	0	1	9
EFCAB1	1		1		1		1		1				1				1		1									1														8	1	0	1	9
FGL2	1		1		1		1		1		1						1		1													1										8	0	1	1	9
FKBP4		1		1		1		1		1		1						1		1				1																		8	1	0	1	9
FUT3		1	1			1				1				1		1		1	1																			1				8	0	1	1	9
GMNN		1		1		1		1		1		1						1		1				1																		8	1	0	1	9
GORASP2		1		1		1		1		1		1		1				1						1																		8	1	0	1	9
GPI		1		1		1		1		1		1						1		1																			1			8	0	1	1	9
HIGD1B	1		1		1				1		1		1		1		1						1																			8	1	0	1	9
KCNA5	1				1		1		1				1		1		1		1				1																			8	1	0	1	9
LDB3		1			1		1		1				1		1		1		1				1																			8	1	0	1	9
MCM7		1		1		1		1		1		1						1		1												1										8	0	1	1	9
NIPSNAP1		1		1		1		1		1		1						1		1				1																		8	1	0	1	9
NR4A3	1				1		1		1		1				1		1		1																			1				8	0	1	1	9
PDE8B	1				1		1		1		1				1		1		1				1																			8	1	0	1	9
PZP	1		1		1		1		1		1						1		1				1																			8	1	0	1	9
RAB11FIP1	1		1		1		1		1		1				1		1							1																		8	1	0	1	9
RAB38		1	1			1				1		1		1				1		1																		1				8	0	1	1	9
RANGAP1		1		1		1		1		1		1						1		1				1																		8	1	0	1	9
RRM1		1		1		1		1		1		1						1		1																			1			8	0	1	1	9
SERPINH1		1	1			1		1		1		1				1		1											1													8	1	0	1	9
SGCG	1		1		1				1		1		1		1		1						1																			8	1	0	1	9
SHC1		1	1			1		1		1		1						1		1								1														8	1	0	1	9
SLC14A1	1		1		1				1		1		1				1		1																				1			8	0	1	1	9
SLC6A8		1		1		1		1		1		1						1		1																				1		8	0	1	1	9
SLPI	1		1		1		1		1		1				1		1											1														8	1	0	1	9
SPRR1A		1		1		1		1		1		1						1		1																					1	8	0	1	1	9
SPTBN2		1		1		1				1		1		1		1		1															1									8	0	1	1	9
SSR4		1		1		1		1		1		1		1				1														1										8	0	1	1	9
TBX4	1				1		1		1		1		1		1		1						1																			8	1	0	1	9
TCF21	1		1		1		1		1		1				1		1						1																			8	1	0	1	9
THY1		1		1		1		1		1						1		1		1																					1	8	0	1	1	9
TMEM158		1		1		1				1		1				1		1		1						1																8	1	0	1	9
TPPP3	1		1				1		1		1				1		1		1				1																			8	1	0	1	9
TRHDE	1				1		1		1		1		1		1		1						1																			8	1	0	1	9
TRPC6	1		1		1		1		1		1				1		1						1																			8	1	0	1	9
TTLL7	1			1	1		1		1				1				1		1										1													8	1	0	1	9
TUBG1		1		1		1		1		1		1						1		1									1													8	1	0	1	9
EGR1	1		1		1		1		1		1						1				1		1		1			1				1		1				1				7	4	3	7	14
IQSEC1	1		1		1		1		1		1						1						1					1				1		1		1		1		1		7	2	5	7	14
CX3CR1	1		1		1				1		1						1		1		1		1					1				1				1		1				7	3	3	6	13
NEDD9	1		1		1				1		1				1		1						1					1				1		1		1		1				7	2	4	6	13
RGL1	1		1		1		1		1		1						1				1		1		1			1										1			1	7	4	2	6	13
TGFBR2	1		1		1				1		1				1		1				1		1					1								1			1	1		7	3	3	6	13
TGFBR3	1		1		1				1				1				1		1				1		1			1								1			1	1		7	3	3	6	13
ABCA6	1		1		1		1		1		1						1						1		1			1					1						1			7	3	2	5	12
ABLIM3	1				1				1		1		1		1		1						1		1			1										1		1		7	3	2	5	12
ALDOC		1		1		1		1		1		1						1					1					1				1						1		1		7	2	3	5	12
CBX7	1				1				1		1				1		1		1				1					1					1						1	1		7	2	3	5	12
CRBN	1		1		1		1		1		1						1						1					1					1			1			1			7	2	3	5	12
FAM189A2	1				1				1		1				1		1		1		1		1		1			1										1				7	4	1	5	12
FOS	1		1		1		1		1		1						1				1		1					1				1						1				7	3	2	5	12
FOSB	1		1		1		1		1		1						1				1		1		1			1										1				7	4	1	5	12
GRK5	1		1		1				1		1		1				1						1		1			1				1						1				7	3	2	5	12
HEG1	1		1		1				1		1		1				1						1					1								1		1		1		7	2	3	5	12
MAN1C1	1				1		1		1		1						1		1				1		1			1								1				1		7	3	2	5	12
METTL7A	1				1		1		1		1						1		1				1		1			1					1						1			7	3	2	5	12
MME	1		1		1				1		1		1		1						1		1					1										1		1		7	3	2	5	12
PRDX4		1				1		1		1		1		1				1						1		1			1			1						1				7	3	2	5	12
STOM	1		1		1				1		1				1		1								1			1				1				1				1		7	2	3	5	12
ZFP36	1		1		1		1		1		1						1				1		1		1			1				1										7	4	1	5	12
ADARB1	1		1		1				1		1		1				1						1					1				1								1		7	2	2	4	11
ALDH2	1		1		1		1		1		1						1						1									1						1		1		7	1	3	4	11
C11orf80		1		1		1		1		1		1						1						1									1			1			1			7	1	3	4	11
C6	1		1		1		1		1				1						1				1					1									1	1				7	2	2	4	11
CASK		1		1		1		1		1		1						1						1					1				1						1			7	2	2	4	11
CAT	1		1		1				1		1				1		1						1		1			1				1										7	3	1	4	11
CCDC69	1		1		1		1		1		1						1						1					1											1	1		7	2	2	4	11
CD52	1		1		1				1		1				1		1							1												1			1	1		7	1	3	4	11
CD83	1		1		1				1		1				1		1							1					1			1							1			7	2	2	4	11
CD93	1		1		1				1		1		1				1						1					1				1						1				7	2	2	4	11
CDC7		1		1		1		1		1								1		1				1					1										1	1		7	2	2	4	11
CTDSPL	1		1		1		1		1		1						1				1							1										1		1		7	2	2	4	11
CXCL2	1		1		1		1		1		1						1				1		1		1			1														7	4	0	4	11
DGUOK		1		1		1		1		1		1		1										1								1							1	1		7	1	3	4	11
DOPEY1		1		1	1		1		1		1								1				1					1								1			1			7	2	2	4	11
EDN1	1		1		1				1		1		1				1				1		1		1			1														7	4	0	4	11
EDNRB	1		1		1				1		1		1				1						1		1			1											1			7	3	1	4	11
ESRP1		1				1		1		1		1		1				1						1					1								1	1				7	2	2	4	11
FCER1A	1		1		1				1		1						1		1		1		1					1												1		7	3	1	4	11
FYCO1	1		1		1		1		1		1						1						1					1											1	1		7	2	2	4	11
GAS7	1		1		1		1		1		1						1						1					1				1									1	7	2	2	4	11
GFPT1		1		1		1				1		1		1				1						1					1									1			1	7	2	2	4	11
GIMAP5	1		1		1		1		1		1						1						1					1										1		1		7	2	2	4	11
GOLT1B		1		1		1		1		1		1						1						1					1							1		1				7	2	2	4	11
H1F0		1				1		1		1		1						1		1				1				1									1	1				7	2	2	4	11
KNTC1		1		1		1		1		1		1						1						1					1				1						1			7	2	2	4	11
MMP9		1				1				1		1				1		1		1				1		1			1											1		7	3	1	4	11
NDRG2	1		1		1				1				1				1		1		1		1		1			1														7	4	0	4	11
NR3C2	1				1		1		1		1						1		1				1					1								1				1		7	2	2	4	11
NR4A1	1				1		1		1		1						1		1		1							1				1						1				7	2	2	4	11
NTRK2	1		1					1	1			1	1		1						1		1					1													1	7	3	1	4	11
PHACTR2	1		1		1				1		1		1				1						1										1			1			1			7	1	3	4	11
PLAGL1	1		1		1			1	1		1						1						1		1			1											1			7	3	1	4	11
PLSCR4	1		1		1		1		1		1						1				1		1					1												1		7	3	1	4	11
PPIF		1				1		1		1		1						1		1				1		1						1						1				7	2	2	4	11
PTDSS1		1	1			1		1		1		1								1				1								1							1		1	7	1	3	4	11
RGCC	1				1				1		1		1		1		1				1		1					1					1									7	3	1	4	11
RIT1		1	1			1		1		1		1						1						1					1							1			1			7	2	2	4	11
S100A4	1		1		1				1		1		1				1						1					1								1			1			7	2	2	4	11
SEC61A1		1		1		1		1		1		1						1						1				1				1									1	7	2	2	4	11
SESN1	1				1		1		1		1				1		1						1		1			1				1										7	3	1	4	11
SLIT2	1		1		1				1		1		1				1						1		1			1										1				7	3	1	4	11
SOBP	1			1	1				1		1						1		1				1					1					1						1			7	2	2	4	11
SORBS3	1		1		1		1		1		1						1						1					1										1			1	7	2	2	4	11
SVEP1	1				1				1		1		1				1		1				1		1			1										1				7	3	1	4	11
SYNE1	1				1		1		1		1				1		1						1					1								1				1		7	2	2	4	11
TACC3		1				1		1		1		1						1		1				1					1										1	1		7	2	2	4	11
TPD52		1		1		1		1		1		1						1						1								1						1		1		7	1	3	4	11
TUBA4A		1				1		1		1		1						1		1				1								1							1	1		7	1	3	4	11
YKT6		1				1		1		1		1						1		1									1			1				1			1			7	1	3	4	11
A2M	1		1		1		1		1		1						1						1		1			1														7	3	0	3	10
ACSS3	1				1		1		1				1				1		1				1					1										1				7	2	1	3	10
ADAMTS1	1		1		1				1		1				1		1						1		1			1														7	3	0	3	10
ADCY9	1		1		1		1		1		1						1											1										1			1	7	1	2	3	10
AGTPBP1	1		1		1				1		1		1				1						1						1										1			7	2	1	3	10
ALDH1A2	1		1		1				1						1		1		1				1					1										1				7	2	1	3	10
ALDOA		1				1		1		1		1						1		1				1				1													1	7	2	1	3	10
ANG	1		1		1		1		1		1								1				1					1										1				7	2	1	3	10
ANXA3	1		1		1				1		1		1				1						1					1												1		7	2	1	3	10
AP1S1		1		1		1		1		1								1		1				1					1												1	7	2	1	3	10
APOL3	1		1		1				1		1		1				1						1													1				1		7	1	2	3	10
ARHGEF15	1		1		1				1		1		1				1						1		1			1														7	3	0	3	10
ARHGEF5			1			1		1		1		1						1		1								1				1						1				7	1	2	3	10
ARHGEF6	1		1		1				1		1		1				1						1					1				1										7	2	1	3	10
ATF3	1		1		1		1		1		1								1		1							1										1				7	2	1	3	10
BRCA1		1		1		1		1		1								1		1				1					1				1									7	2	1	3	10
C1orf21	1		1		1				1		1				1		1						1		1			1														7	3	0	3	10
CALCOCO1	1		1		1		1		1		1						1						1					1					1									7	2	1	3	10
CAND1		1		1		1		1		1		1						1						1					1										1			7	2	1	3	10
CD69	1		1		1				1		1						1		1					1								1				1						7	1	2	3	10
CENPN		1		1		1				1		1						1		1				1					1									1				7	2	1	3	10
CKAP2		1		1		1		1		1								1		1				1					1									1				7	2	1	3	10
CLDN5	1		1		1				1		1				1		1						1		1			1														7	3	0	3	10
CLEC3B	1		1				1		1		1		1				1						1		1			1														7	3	0	3	10
CLIC3	1		1		1				1		1				1		1							1												1				1		7	1	2	3	10
CNIH4		1	1			1		1		1		1								1				1					1										1			7	2	1	3	10
COL1A1		1		1		1		1		1		1						1						1							1							1				7	2	1	3	10
COLEC12	1		1		1				1		1				1		1						1					1									1					7	2	1	3	10
COX7A1	1		1		1		1		1		1						1				1		1					1														7	3	0	3	10
CSE1L		1		1		1		1		1		1						1						1					1										1			7	2	1	3	10
CTSS	1		1		1		1		1		1						1							1								1							1			7	1	2	3	10
DENND3	1		1		1				1		1				1		1															1		1				1				7	0	3	3	10
DLC1	1		1		1				1		1				1		1						1		1			1														7	3	0	3	10
DNMT1		1		1		1		1		1		1								1				1					1										1			7	2	1	3	10
DPYSL2	1		1		1				1		1				1		1						1		1			1														7	3	0	3	10
ELMO1	1			1	1				1		1		1				1						1					1				1										7	2	1	3	10
EPRS		1		1		1		1		1				1				1						1					1				1									7	2	1	3	10
EZH2		1		1		1		1		1								1		1				1					1										1			7	2	1	3	10
FCN1	1		1		1				1		1		1				1						1									1						1				7	1	2	3	10
FLAD1		1				1		1		1		1						1		1				1					1										1			7	2	1	3	10
FLI1	1		1		1				1				1		1		1						1					1				1										7	2	1	3	10
FRMD4B	1		1		1				1		1				1		1						1					1								1						7	2	1	3	10
FZD3		1		1			1			1				1				1	1					1						1			1									7	2	1	3	10
GADD45B	1		1		1		1		1		1						1							1								1						1				7	1	2	3	10
GGH				1		1		1		1		1						1		1				1					1									1				7	2	1	3	10
GLRX	1		1		1		1		1		1						1															1						1		1		7	0	3	3	10
H2AFZ		1		1		1		1		1		1						1						1					1							1						7	2	1	3	10
HDGF		1				1		1		1		1						1		1				1					1			1										7	2	1	3	10
HNRNPAB		1				1		1		1		1						1		1				1					1			1										7	2	1	3	10
HSD17B6	1		1		1				1		1				1		1							1		1			1													7	3	0	3	10
HYAL1	1		1		1				1		1				1		1						1		1			1														7	3	0	3	10
ICAM2	1		1		1		1		1		1						1						1					1				1										7	2	1	3	10
ID2	1		1		1				1		1						1		1													1				1		1				7	0	3	3	10
ILF2		1		1		1		1		1		1						1						1					1			1										7	2	1	3	10
IRAK3	1		1		1		1		1		1						1						1									1						1				7	1	2	3	10
ITPR1	1		1		1		1		1		1						1											1				1							1			7	1	2	3	10
JUP		1				1		1		1		1						1		1								1		1		1										7	2	1	3	10
KDR	1		1		1		1		1		1						1						1					1										1				7	2	1	3	10
KIF18B		1				1				1		1				1		1		1				1					1									1				7	2	1	3	10
KIF1C	1		1		1		1		1		1						1						1					1													1	7	2	1	3	10
KLF6	1		1		1				1		1		1				1				1		1					1														7	3	0	3	10
KLRF1	1		1		1				1		1						1		1				1													1		1				7	1	2	3	10
LHX6	1		1		1		1		1				1						1				1		1			1														7	3	0	3	10
LIMCH1	1		1		1		1		1		1						1						1					1												1		7	2	1	3	10
LST1	1		1		1				1		1		1				1							1								1						1				7	1	2	3	10
LTA4H	1		1		1			1	1		1						1											1											1	1		7	1	2	3	10
MAFF	1		1		1		1		1		1						1				1		1					1														7	3	0	3	10
MAOB	1				1		1		1		1						1		1				1					1										1				7	2	1	3	10
MAPK13		1		1		1		1		1		1								1				1					1											1		7	2	1	3	10
MAPK6		1		1		1		1		1		1						1						1												1					1	7	1	2	3	10
MARS		1		1		1		1		1		1						1						1									1						1			7	1	2	3	10
MGLL	1		1		1		1		1		1						1						1					1				1										7	2	1	3	10
MLLT11				1		1		1		1		1						1		1				1									1						1			7	1	2	3	10
MLPH			1		1		1		1		1			1					1					1				1										1				7	2	1	3	10
MRPL3		1		1		1		1		1		1						1						1					1			1										7	2	1	3	10
MSR1	1		1		1				1		1				1		1									1			1									1				7	2	1	3	10
MSRA	1		1		1		1		1		1						1						1					1				1										7	2	1	3	10
MYOC	1				1		1		1		1						1		1				1		1																1	7	2	1	3	10
NCALD	1			1	1		1		1						1				1					1				1										1				7	2	1	3	10
NCAPG2		1				1		1		1		1						1		1				1					1										1			7	2	1	3	10
NME1		1		1				1		1		1						1		1				1					1			1										7	2	1	3	10
OLR1	1		1		1				1		1				1		1							1		1			1													7	3	0	3	10
PDK1		1				1		1		1		1				1		1														1				1		1				7	0	3	3	10
PFN2		1		1		1				1		1				1		1						1									1						1			7	1	2	3	10
PIMREG		1				1				1		1				1		1		1				1					1									1				7	2	1	3	10
PMAIP1		1		1		1				1		1						1		1									1							1			1			7	1	2	3	10
POLE2		1		1		1		1		1		1						1						1					1											1		7	2	1	3	10
POLQ		1		1		1		1		1								1		1				1					1									1				7	2	1	3	10
PPP1R15A	1		1		1		1		1		1						1						1					1										1				7	2	1	3	10
PTGDS	1		1				1		1		1				1		1						1					1										1				7	2	1	3	10
PTH1R	1				1				1		1		1		1		1						1					1										1				7	2	1	3	10
PTHLH		1				1		1		1		1						1		1	1		1					1														7	3	0	3	10
PTPRM	1		1				1		1		1		1				1						1					1								1						7	2	1	3	10
PYCR1		1		1		1				1		1		1				1						1					1									1				7	2	1	3	10
RGS5	1				1		1		1		1		1				1						1					1										1				7	2	1	3	10
SASH1	1		1		1				1		1		1				1						1		1			1														7	3	0	3	10
SEMA3G	1		1		1				1		1		1				1						1		1			1														7	3	0	3	10
SERPINB6	1		1		1		1		1		1						1											1				1				1						7	1	2	3	10
SH3GL3	1		1		1				1				1		1		1												1									1			1	7	1	2	3	10
SLC1A4		1		1		1		1		1		1						1						1								1						1				7	1	2	3	10
SLC27A3	1		1		1				1		1				1		1						1		1			1														7	3	0	3	10
SLC2A1		1		1		1		1		1		1						1						1					1			1										7	2	1	3	10
SMARCA2	1		1		1		1		1		1						1						1					1											1			7	2	1	3	10
SNRPD1		1		1		1		1		1		1						1						1					1			1										7	2	1	3	10
SPOCK2	1		1		1				1		1		1				1																1						1	1		7	0	3	3	10
STIP1		1				1		1		1		1						1		1				1					1				1									7	2	1	3	10
STX11	1		1		1				1		1				1		1						1									1							1			7	1	2	3	10
TACC1	1		1		1				1		1				1		1						1		1			1														7	3	0	3	10
TARS		1		1		1		1		1								1		1									1							1					1	7	1	2	3	10
TEK	1		1		1		1		1				1				1						1		1													1				7	2	1	3	10
THBD	1		1		1				1		1				1		1						1		1			1														7	3	0	3	10
TIMM8A		1		1		1				1		1						1		1									1				1								1	7	1	2	3	10
TMEM14A		1		1		1		1		1		1						1						1					1										1			7	2	1	3	10
TNS1	1		1		1		1		1		1						1						1					1												1		7	2	1	3	10
TOPBP1		1		1		1		1		1		1						1						1					1										1			7	2	1	3	10
TSC22D3	1		1		1		1		1		1				1								1					1										1				7	2	1	3	10
TUBA1C			1			1		1		1		1						1		1				1					1										1			7	2	1	3	10
TUBB6	1		1					1	1				1				1			1			1					1										1				7	2	1	3	10
TYROBP	1		1		1				1		1				1		1															1						1			1	7	0	3	3	10
UBE2L3		1		1		1		1		1		1								1				1												1					1	7	1	2	3	10
VCAN		1				1		1		1		1				1		1													1	1						1				7	1	2	3	10
WDR19	1			1	1		1		1		1								1				1					1											1			7	2	1	3	10
WISP1		1				1		1		1						1		1		1				1		1			1													7	3	0	3	10
ABI3BP	1		1		1		1		1				1				1						1		1																	7	2	0	2	9
ACSL1	1				1			1	1		1				1		1						1																1			7	1	1	2	9
AHCY		1		1				1		1		1						1		1				1													1					7	1	1	2	9
ALOX5	1		1		1				1		1				1		1											1											1			7	1	1	2	9
ALOX5AP	1		1		1				1		1				1		1									1										1						7	1	1	2	9
ALPL	1		1		1		1		1		1						1											1												1		7	1	1	2	9
ATAD2		1		1		1		1		1		1						1						1					1													7	2	0	2	9
ATIC		1		1		1		1		1				1				1						1															1			7	1	1	2	9
ATP1A2	1				1				1				1		1		1		1				1					1														7	2	0	2	9
BIK		1		1		1				1		1				1		1						1																	1	7	1	1	2	9
BLM		1		1		1		1		1								1		1				1					1													7	2	0	2	9
BMP2	1		1		1				1		1				1		1						1		1																	7	2	0	2	9
C14orf132	1				1				1		1		1		1		1						1					1														7	2	0	2	9
C16orf45	1			1	1		1		1		1								1				1					1														7	2	0	2	9
C1orf112		1		1		1		1		1		1						1						1					1													7	2	0	2	9
C5AR1	1		1		1		1		1		1						1															1								1		7	0	2	2	9
C7	1		1		1				1		1				1		1						1					1														7	2	0	2	9
CALCRL	1		1		1				1		1		1				1												1												1	7	1	1	2	9
CALML3		1		1		1		1				1						1		1								1										1				7	1	1	2	9
CAMK2N1	1		1		1				1		1		1				1							1				1														7	2	0	2	9
CBFA2T3	1		1		1				1		1		1				1																1						1			7	0	2	2	9
CCDC102B	1		1		1				1		1		1				1						1																1			7	1	1	2	9
CCNE2		1		1		1		1		1				1				1						1					1													7	2	0	2	9
CCT5		1		1		1		1		1		1						1						1					1													7	2	0	2	9
CD55	1		1		1		1		1		1						1															1								1		7	0	2	2	9
CDK4		1		1				1		1		1						1		1				1					1													7	2	0	2	9
CENPI		1		1		1		1		1								1		1				1					1													7	2	0	2	9
CHPF		1		1		1				1		1						1		1																		1			1	7	0	2	2	9
CIRBP	1			1	1		1		1		1						1						1					1														7	2	0	2	9
CKAP5		1		1		1		1		1		1						1						1					1													7	2	0	2	9
CKS2		1				1		1		1		1						1		1				1					1													7	2	0	2	9
CNTNAP2		1		1		1				1		1						1		1				1															1			7	1	1	2	9
CPEB3		1		1	1		1		1		1								1		1																		1			7	1	1	2	9
CPVL	1		1		1				1		1				1		1															1								1		7	0	2	2	9
CSTA	1		1					1	1			1			1					1												1						1				7	0	2	2	9
CTSO	1		1		1		1		1		1						1						1					1														7	2	0	2	9
CYBB	1		1		1			1	1		1						1															1						1				7	0	2	2	9
CYR61	1		1		1		1		1		1						1				1							1														7	2	0	2	9
DIRAS3	1			1	1		1		1		1								1				1					1														7	2	0	2	9
DIXDC1	1				1		1		1		1						1		1				1					1														7	2	0	2	9
DNAJA3		1		1		1		1		1		1						1						1																1		7	1	1	2	9
DOCK6	1		1		1				1		1		1				1						1					1														7	2	0	2	9
DSCC1		1				1		1		1		1						1		1				1					1													7	2	0	2	9
E2F1		1		1		1		1		1								1		1				1														1				7	1	1	2	9
E2F3		1		1		1		1		1								1		1				1					1													7	2	0	2	9
ECT2		1		1		1		1		1		1						1						1					1													7	2	0	2	9
EFCC1	1				1				1		1				1		1		1						1			1														7	2	0	2	9
EFNA4		1	1			1				1		1						1		1				1															1			7	1	1	2	9
EFNB1	1		1					1	1			1	1							1			1																		1	7	1	1	2	9
FXR1		1		1		1		1		1		1						1																					1		1	7	0	2	2	9
FXYD6	1			1	1			1	1		1						1						1					1														7	2	0	2	9
GGCT		1				1		1		1				1				1		1				1					1													7	2	0	2	9
GNG4		1		1		1				1						1		1		1									1									1				7	1	1	2	9
GPA33	1		1		1				1		1				1		1							1														1				7	1	1	2	9
GPM6B	1				1		1		1		1						1		1				1					1														7	2	0	2	9
HDAC1		1		1		1		1		1		1						1						1															1			7	1	1	2	9
HK3	1		1		1				1		1				1		1															1						1				7	0	2	2	9
HMGA1		1				1				1		1				1		1		1				1					1													7	2	0	2	9
HMGB3		1		1		1				1		1		1				1						1					1													7	2	0	2	9
HNMT		1	1		1		1		1		1						1						1					1														7	2	0	2	9
HSPB8	1		1		1				1		1				1		1						1					1														7	2	0	2	9
IARS		1		1		1		1		1		1						1						1					1													7	2	0	2	9
IL16	1		1		1		1		1								1		1													1								1		7	0	2	2	9
IRAK1		1				1		1		1		1						1		1				1								1										7	1	1	2	9
ITGA1	1		1		1				1		1		1				1						1																1			7	1	1	2	9
KIF3C		1		1		1				1		1						1		1				1														1				7	1	1	2	9
KLK8		1				1		1		1		1						1		1			1					1														7	2	0	2	9
KMO	1		1					1	1		1				1		1							1															1			7	1	1	2	9
LAMA4	1		1		1				1		1		1				1						1					1														7	2	0	2	9
LAMB3		1	1			1				1		1						1		1			1					1														7	2	0	2	9
LCP1	1		1		1			1	1		1						1							1								1										7	1	1	2	9
LONRF3			1		1				1		1				1		1		1														1								1	7	0	2	2	9
LSM2		1				1		1		1		1						1		1				1															1			7	1	1	2	9
LYPD3		1		1		1				1		1						1		1				1				1														7	2	0	2	9
MAP1LC3C	1		1		1				1		1				1		1						1															1				7	1	1	2	9
MARCO	1		1		1				1		1				1		1						1															1				7	1	1	2	9
MCM5		1				1		1		1		1						1		1													1						1			7	0	2	2	9
MFAP2		1		1						1		1				1		1		1						1			1													7	2	0	2	9
MGAT3	1				1				1		1		1		1		1						1															1				7	1	1	2	9
MITF	1		1		1		1		1		1						1						1					1														7	2	0	2	9
MMP19	1		1		1				1		1				1		1						1															1				7	1	1	2	9
MSH2		1		1		1		1		1		1						1						1					1													7	2	0	2	9
MSH6		1		1		1		1		1		1						1						1					1													7	2	0	2	9
MT1M	1		1		1		1		1		1						1						1					1														7	2	0	2	9
MYO5C	1		1		1		1		1		1						1								1			1														7	2	0	2	9
NCAPD2		1				1		1		1		1						1		1				1					1													7	2	0	2	9
NCAPH		1				1		1		1		1						1		1				1					1													7	2	0	2	9
NCF2	1		1		1				1		1				1		1												1			1										7	1	1	2	9
NEIL3		1		1		1		1		1								1		1				1					1													7	2	0	2	9
NES	1		1		1				1		1		1				1											1										1				7	1	1	2	9
NOTCH4	1		1		1				1		1		1				1						1					1														7	2	0	2	9
NPR1	1				1				1		1				1		1		1				1					1														7	2	0	2	9
NTRK3	1				1		1		1				1		1				1				1															1				7	1	1	2	9
NUDT1		1				1		1		1		1						1		1									1												1	7	1	1	2	9
OLA1		1		1		1		1		1		1						1											1										1			7	1	1	2	9
PABPC3		1		1		1	1			1		1						1						1																	1	7	1	1	2	9
PAFAH1B3		1		1		1				1		1						1		1				1					1													7	2	0	2	9
PARP1		1		1		1		1		1		1						1						1					1													7	2	0	2	9
PKMYT1		1		1		1				1		1						1		1				1					1													7	2	0	2	9
PLK4		1		1		1		1		1								1		1				1					1													7	2	0	2	9
POLA2		1		1		1		1		1		1						1						1					1													7	2	0	2	9
POLR2D		1		1		1		1		1		1						1						1					1													7	2	0	2	9
PPARG	1		1		1				1		1				1		1						1					1														7	2	0	2	9
PPM1G		1		1		1		1		1								1		1				1					1													7	2	0	2	9
PPP1R14B		1		1						1		1				1		1		1				1					1													7	2	0	2	9
PPP2R3A		1				1		1		1		1		1				1					1															1				7	1	1	2	9
PRMT1				1		1		1		1		1						1		1				1													1					7	1	1	2	9
PROS1	1		1		1		1		1		1						1						1					1														7	2	0	2	9
PRUNE2	1				1		1		1		1		1						1				1					1														7	2	0	2	9
PSMC4		1				1		1		1		1						1		1				1					1													7	2	0	2	9
PTPRB	1		1		1				1		1		1				1						1					1														7	2	0	2	9
PUS7		1		1		1		1		1								1		1				1					1													7	2	0	2	9
RAB15		1		1		1				1		1		1				1						1				1														7	2	0	2	9
RAD54B		1		1				1		1		1						1		1				1					1													7	2	0	2	9
RAE1		1		1		1		1		1		1						1						1															1			7	1	1	2	9
RAMP2	1		1		1				1		1		1				1						1					1														7	2	0	2	9
RASL12	1		1		1				1		1				1		1						1					1														7	2	0	2	9
RBPMS	1		1		1		1		1		1						1						1					1														7	2	0	2	9
RFC3		1		1		1		1		1		1						1						1					1													7	2	0	2	9
RPL39L		1				1		1		1		1						1		1				1					1													7	2	0	2	9
SECISBP2L	1				1		1		1		1				1		1						1																1			7	1	1	2	9
SFXN1		1		1		1		1		1		1						1						1					1													7	2	0	2	9
SKA1		1				1				1		1				1		1		1				1					1													7	2	0	2	9
SLC35B1		1		1		1		1		1				1				1						1					1													7	2	0	2	9
SMAD6	1		1		1				1		1		1				1						1																		1	7	1	1	2	9
SOD3	1				1		1		1		1				1		1						1					1														7	2	0	2	9
SPATS2		1		1		1		1		1		1						1						1					1													7	2	0	2	9
SPC25		1		1		1		1		1		1						1						1					1													7	2	0	2	9
STAT5A	1		1		1		1		1		1						1						1					1														7	2	0	2	9
STIL		1		1		1		1		1		1						1						1					1													7	2	0	2	9
TBC1D4	1		1		1			1	1		1						1						1					1														7	2	0	2	9
TBX2	1		1		1				1		1		1				1						1					1														7	2	0	2	9
TFAP2A		1		1		1		1		1		1						1						1				1														7	2	0	2	9
TFF3		1		1	1		1			1	1								1					1	1																	7	2	0	2	9
TIE1	1		1		1				1		1		1				1						1					1														7	2	0	2	9
TNFRSF21		1		1		1				1		1				1		1					1															1				7	1	1	2	9
TOX3		1		1						1	1			1				1	1					1															1			7	1	1	2	9
TPBG		1		1		1				1		1				1		1										1										1				7	1	1	2	9
TRAF4		1		1		1				1		1				1		1						1															1			7	1	1	2	9
TTF2		1		1		1		1		1		1						1											1										1			7	1	1	2	9
USP39		1		1		1		1		1		1								1				1															1			7	1	1	2	9
VAT1	1		1		1			1	1		1						1						1					1														7	2	0	2	9
VRK1		1		1		1		1		1								1		1									1			1										7	1	1	2	9
VSIG4	1		1		1				1		1				1		1						1					1														7	2	0	2	9
WDYHV1		1				1		1		1		1						1		1				1					1													7	2	0	2	9
ZFP64		1		1		1		1		1		1						1						1															1			7	1	1	2	9
ZNF423	1				1		1		1		1		1				1						1					1														7	2	0	2	9
ACE	1				1				1		1		1		1		1						1																			7	1	0	1	8
ACOXL	1		1		1		1		1						1		1																						1			7	0	1	1	8
ADH1A	1		1		1		1		1								1		1				1																			7	1	0	1	8
ALG3		1				1		1		1		1						1		1				1																		7	1	0	1	8
ANKRD1	1		1		1				1		1		1				1						1																			7	1	0	1	8
APBB1	1				1		1		1		1						1		1									1														7	1	0	1	8
APBB2	1			1	1				1		1		1				1											1														7	1	0	1	8
ARNTL2		1				1		1		1		1						1		1									1													7	1	0	1	8
B3GNT3		1				1	1			1				1				1	1																			1				7	0	1	1	8
BTK	1		1		1				1		1				1		1																								1	7	0	1	1	8
C17orf53		1		1		1				1		1						1		1			1																			7	1	0	1	8
C1orf116	1		1		1				1		1				1		1											1														7	1	0	1	8
C1QBP		1		1		1				1		1						1		1												1										7	0	1	1	8
CACNA2D2	1		1		1				1		1				1		1																			1						7	0	1	1	8
CCDC68	1		1		1				1		1						1		1						1																	7	1	0	1	8
CCT7		1		1		1		1		1		1						1						1																		7	1	0	1	8
CDH19	1			1	1		1		1								1		1				1																			7	1	0	1	8
CDH3		1				1				1		1		1				1		1								1														7	1	0	1	8
CHAF1B		1		1		1				1		1						1		1				1																		7	1	0	1	8
CHIA	1				1				1		1			1	1		1						1																			7	1	0	1	8
CHRNA5		1		1		1				1				1				1		1									1													7	1	0	1	8
COL17A1		1				1		1		1		1						1		1								1														7	1	0	1	8
COL7A1		1		1		1				1		1						1		1								1														7	1	0	1	8
CPB2	1		1		1				1		1				1		1							1																		7	1	0	1	8
CRABP2		1		1		1				1				1				1		1				1																		7	1	0	1	8
CXCL13		1		1		1		1		1		1				1								1																		7	1	0	1	8
DAPK2	1		1		1				1		1				1		1						1																			7	1	0	1	8
DSC2		1	1			1		1		1		1						1																				1				7	0	1	1	8
DSP		1		1		1		1		1		1						1														1										7	0	1	1	8
EEF1A2		1		1		1				1		1		1				1						1																		7	1	0	1	8
EGLN3		1				1				1		1	1			1		1						1																		7	1	0	1	8
EML1	1		1		1		1		1		1						1						1																			7	1	0	1	8
EMP2	1				1			1	1		1				1		1											1														7	1	0	1	8
EPN3		1		1		1				1		1				1		1						1																		7	1	0	1	8
ERBB4	1				1		1		1		1				1				1									1														7	1	0	1	8
ETV4		1		1		1				1		1						1		1																		1				7	0	1	1	8
FAM162A		1				1		1		1		1						1		1																			1			7	0	1	1	8
FANCE		1		1		1				1		1						1		1																			1			7	0	1	1	8
FAP		1				1		1		1						1		1		1				1																		7	1	0	1	8
FARSA		1		1		1		1		1		1								1				1																		7	1	0	1	8
FGFR4	1		1		1				1		1				1		1																							1		7	0	1	1	8
FKBP3		1		1		1		1		1		1						1																					1			7	0	1	1	8
FMO5		1	1		1		1				1				1				1									1														7	1	0	1	8
FOXE1		1				1		1		1		1						1		1			1																			7	1	0	1	8
GAB1	1		1		1			1	1				1				1						1																			7	1	0	1	8
GAD1		1		1		1	1			1				1				1																				1				7	0	1	1	8
GARS		1		1		1				1		1		1				1											1													7	1	0	1	8
GART		1		1		1		1		1		1						1											1													7	1	0	1	8
GATA2	1		1		1				1				1		1		1											1														7	1	0	1	8
GIMAP4	1		1		1				1		1		1				1						1																			7	1	0	1	8
GINS4		1		1		1				1		1						1		1				1																		7	1	0	1	8
GNA14	1		1		1		1		1		1								1																						1	7	0	1	1	8
GPR87		1				1		1		1		1						1		1			1																			7	1	0	1	8
GPRC5A	1		1		1		1		1		1						1							1																		7	1	0	1	8
HBEGF	1		1		1				1		1				1		1											1														7	1	0	1	8
HDAC2		1		1		1		1		1		1						1											1													7	1	0	1	8
HIST1H2BD		1		1		1				1		1				1		1						1																		7	1	0	1	8
HLA-E	1		1		1				1		1		1				1																							1		7	0	1	1	8
HOXA10		1		1		1				1		1						1		1			1																			7	1	0	1	8
IL20RA	1			1	1				1		1		1						1									1														7	1	0	1	8
ITPKA		1		1		1				1		1				1		1					1																			7	1	0	1	8
KDELR1		1		1		1		1		1		1						1						1																		7	1	0	1	8
KDM5B		1				1		1		1		1				1		1						1																		7	1	0	1	8
KIF17	1				1		1		1		1		1				1						1																			7	1	0	1	8
KIF22		1				1		1		1		1						1		1				1																		7	1	0	1	8
KRT16		1				1		1		1		1						1		1										1												7	1	0	1	8
LDLR	1		1		1				1		1				1		1											1														7	1	0	1	8
LIFR	1		1		1		1		1		1						1						1																			7	1	0	1	8
LMCD1	1		1		1		1		1		1						1						1																			7	1	0	1	8
LRRC49	1			1	1		1		1		1								1				1																			7	1	0	1	8
MAGED1		1		1		1				1		1		1				1						1																		7	1	0	1	8
MAGEF1		1		1		1		1		1		1						1						1																		7	1	0	1	8
MB		1		1			1			1				1				1	1					1																		7	1	0	1	8
MED20		1		1		1				1		1		1				1											1													7	1	0	1	8
MLF2		1		1		1		1		1		1								1				1																		7	1	0	1	8
NCAPD3		1		1		1		1		1		1						1						1																		7	1	0	1	8
NOP2		1				1		1		1		1						1		1				1																		7	1	0	1	8
NQO1		1	1			1				1		1		1				1																							1	7	0	1	1	8
NUP155		1		1		1		1		1		1						1											1													7	1	0	1	8
PAPSS2	1		1		1				1		1		1				1																					1				7	0	1	1	8
PDZRN4	1			1	1				1		1		1						1				1																			7	1	0	1	8
PGBD5		1		1		1				1		1						1		1									1													7	1	0	1	8
PGD		1	1			1		1		1		1								1												1										7	0	1	1	8
PI15		1		1		1		1								1		1		1								1														7	1	0	1	8
PLA1A	1		1		1				1		1						1		1					1																		7	1	0	1	8
PLCL1	1			1	1		1		1								1		1				1																			7	1	0	1	8
PLP2		1				1		1		1		1						1		1																					1	7	0	1	1	8
POLB		1		1		1		1		1		1						1						1																		7	1	0	1	8
PPME1		1		1		1		1		1		1						1						1																		7	1	0	1	8
PPP1R3C			1		1		1		1		1						1		1									1														7	1	0	1	8
PRDX2		1		1		1				1		1						1		1																				1		7	0	1	1	8
PRIM2		1		1		1		1		1		1						1											1													7	1	0	1	8
PRKDC		1		1		1		1		1		1						1						1																		7	1	0	1	8
PTPN21	1		1		1				1		1		1				1											1														7	1	0	1	8
PTPRF		1		1		1		1		1		1						1										1														7	1	0	1	8
RAPGEF4	1			1	1				1		1		1				1						1																			7	1	0	1	8
REEP1	1			1	1				1		1				1		1								1																	7	1	0	1	8
RETN	1		1		1				1		1				1		1																							1		7	0	1	1	8
RNF187		1		1		1				1		1						1		1				1																		7	1	0	1	8
RPL8		1	1					1		1		1						1		1												1										7	0	1	1	8
RRAD	1		1		1		1		1		1						1						1																			7	1	0	1	8
SERPINE2		1		1		1		1		1		1						1																						1		7	0	1	1	8
SF3B3		1		1		1		1		1		1						1																						1		7	0	1	1	8
SFN		1				1		1		1		1						1		1										1												7	1	0	1	8
SFTPD	1		1		1				1		1				1		1						1																			7	1	0	1	8
SLC16A5	1		1		1		1		1		1						1																						1			7	0	1	1	8
SLC22A3		1	1		1				1		1						1		1				1																			7	1	0	1	8
SLC31A2	1		1		1			1	1		1				1																							1				7	0	1	1	8
SLC39A8	1		1		1				1		1				1		1																					1				7	0	1	1	8
SLC3A2		1	1			1		1		1								1		1				1																		7	1	0	1	8
SLC6A16	1		1		1		1		1		1								1						1																	7	1	0	1	8
SLC7A1		1		1		1		1		1		1						1																					1			7	0	1	1	8
SLC9A3R2	1		1		1		1		1		1						1																								1	7	0	1	1	8
SOX12		1		1		1				1		1						1		1																			1			7	0	1	1	8
SPRR3		1				1		1		1		1						1		1									1													7	1	0	1	8
SRD5A1		1		1		1		1		1		1						1						1																		7	1	0	1	8
SRPRB		1		1		1		1		1		1						1						1																		7	1	0	1	8
SSRP1		1		1		1		1		1		1						1						1																		7	1	0	1	8
STEAP3		1		1		1	1			1		1		1																								1				7	0	1	1	8
STX2	1				1		1		1		1		1				1						1																			7	1	0	1	8
TARBP1		1		1		1		1		1				1				1						1																		7	1	0	1	8
TCF3		1		1		1		1		1		1						1																					1			7	0	1	1	8
TGM2	1		1		1				1		1		1				1							1																		7	1	0	1	8
THBS2		1				1		1		1		1				1		1													1											7	1	0	1	8
TLR3	1		1		1		1		1		1						1						1																			7	1	0	1	8
TNNC1	1		1		1				1		1				1		1						1																			7	1	0	1	8
TOMM40		1		1		1				1		1						1		1				1																		7	1	0	1	8
TPPP	1				1		1		1						1		1		1									1														7	1	0	1	8
TTLL12		1				1		1		1		1						1		1				1																		7	1	0	1	8
VARS		1		1		1		1		1		1						1						1																		7	1	0	1	8
VNN2	1		1		1		1		1								1		1																	1						7	0	1	1	8
WASF1		1				1		1		1		1						1		1			1																			7	1	0	1	8
WWC2	1		1		1				1		1		1				1						1																			7	1	0	1	8
ABLIM1	1		1		1				1		1						1						1		1			1								1			1	1		6	3	3	6	12
JUN	1				1		1		1		1						1				1				1			1				1						1				6	3	2	5	11
ARHGEF3	1		1		1				1		1						1											1					1			1			1	1		6	1	4	5	11
CD59	1		1		1		1		1								1				1		1					1								1				1		6	3	2	5	11
CDKN2A		1		1		1				1								1		1						1			1				1					1			1	6	2	3	5	11
CHPT1	1		1		1				1		1						1				1		1					1				1								1		6	3	2	5	11
CREBL2	1			1	1				1		1						1						1					1					1						1	1		6	2	3	5	11
CRTAP	1		1		1			1	1								1						1					1				1						1			1	6	2	3	5	11
EPB41L2	1		1		1				1		1						1						1					1				1		1				1				6	2	3	5	11
ETS2	1				1		1		1		1						1						1		1			1				1						1				6	3	2	5	11
GFOD1	1		1		1				1				1				1						1		1								1						1	1		6	2	3	5	11
LEF1		1				1		1		1		1						1						1		1							1						1	1		6	2	3	5	11
LGALS3			1		1		1		1		1						1						1		1			1				1						1				6	3	2	5	11
MEST		1		1		1				1								1		1	1		1					1					1				1					6	3	2	5	11
MPDZ	1				1		1		1		1						1						1		1			1										1		1		6	3	2	5	11
NEK3	1		1		1		1		1		1												1					1					1		1				1			6	2	3	5	11
PER1	1		1		1		1		1		1										1		1					1				1						1				6	3	2	5	11
PSMA7		1	1			1		1		1										1				1					1			1							1		1	6	2	3	5	11
RGS2	1		1		1				1		1						1				1							1				1						1		1		6	2	3	5	11
SNRK	1		1		1				1		1						1						1		1			1				1								1		6	3	2	5	11
SPRY1	1				1		1		1		1						1				1		1		1			1										1				6	4	1	5	11
SPRY2	1		1		1		1		1								1				1		1		1			1											1			6	4	1	5	11
TMPO				1		1		1		1		1						1						1		1			1							1			1			6	3	2	5	11
ABR				1	1		1		1		1						1						1					1					1						1			6	2	2	4	10
ABCG2	1				1				1		1				1		1						1					1										1		1		6	2	2	4	10
ACKR1	1				1				1		1				1		1						1		1			1												1		6	3	1	4	10
ADAMDEC1		1				1				1		1		1				1						1					1										1		1	6	2	2	4	10
ADTRP	1				1				1		1				1		1																1		1				1		1	6	0	4	4	10
AHNAK	1		1		1				1		1						1						1					1					1						1			6	2	2	4	10
AKAP12	1		1		1				1		1		1										1					1					1						1			6	2	2	4	10
ANGPTL4			1			1				1						1		1		1			1		1			1										1				6	3	1	4	10
ANKS1A	1		1		1				1		1						1						1		1			1											1			6	3	1	4	10
ANXA1	1		1		1				1				1		1						1		1					1				1										6	3	1	4	10
ANXA11	1		1		1		1		1		1												1					1					1						1			6	2	2	4	10
ARGLU1	1				1		1		1				1				1						1		1			1											1			6	3	1	4	10
ARHGAP25	1		1						1		1		1				1																1			1			1	1		6	0	4	4	10
ARL4C						1		1		1		1						1		1	1							1								1			1			6	2	2	4	10
ARRB1	1		1		1				1		1						1						1					1								1		1				6	2	2	4	10
AUH	1			1	1		1		1		1												1		1			1												1		6	3	1	4	10
B4GALT3		1		1		1		1		1								1						1					1				1						1			6	2	2	4	10
CD302	1		1						1		1				1		1						1					1				1						1				6	2	2	4	10
CST3			1		1		1		1		1						1						1					1				1						1				6	2	2	4	10
DDX39A		1				1				1		1						1		1				1					1			1							1			6	2	2	4	10
DENND4C	1		1		1				1		1						1						1					1											1	1		6	2	2	4	10
DGKA		1				1		1		1		1						1										1					1						1	1		6	1	3	4	10
DMD	1				1		1		1		1						1				1		1					1					1									6	3	1	4	10
DPP3		1				1				1		1						1		1				1					1							1					1	6	2	2	4	10
EDEM1	1		1					1	1		1						1							1				1								1			1			6	2	2	4	10
EGR3	1				1		1		1								1		1		1		1					1											1			6	3	1	4	10
EVI2A	1		1		1				1		1						1							1		1						1				1						6	2	2	4	10
FBP1	1		1		1				1		1						1							1				1				1						1				6	2	2	4	10
FCGR3B	1		1						1		1		1				1							1					1			1								1		6	2	2	4	10
FCGRT	1		1		1				1		1						1						1					1					1						1			6	2	2	4	10
FES	1		1		1				1				1				1						1									1						1			1	6	1	3	4	10
FILIP1L	1		1		1				1		1				1								1					1					1						1			6	2	2	4	10
FRY	1				1				1		1				1		1						1					1					1						1			6	2	2	4	10
GMFG	1		1		1				1		1						1						1					1								1			1			6	2	2	4	10
GNAQ	1				1				1		1		1				1						1					1				1						1				6	2	2	4	10
HILPDA		1				1				1		1						1		1		1							1								1	1				6	2	2	4	10
IDH2		1				1		1		1		1						1						1		1						1						1				6	2	2	4	10
IDI1	1				1				1		1				1		1							1								1				1				1		6	1	3	4	10
IQGAP2			1		1		1		1		1						1											1				1						1		1		6	1	3	4	10
JPT1		1				1				1		1						1		1				1		1			1			1										6	3	1	4	10
KCTD12	1				1		1		1		1						1						1					1				1						1				6	2	2	4	10
KIT	1		1		1		1		1		1										1		1					1		1												6	4	0	4	10
KL	1				1				1		1		1				1						1					1								1			1			6	2	2	4	10
LBH	1		1		1				1		1						1											1					1						1	1		6	1	3	4	10
MAP3K3	1		1		1				1		1						1						1					1				1								1		6	2	2	4	10
MEOX2	1		1		1				1		1								1				1		1			1											1			6	3	1	4	10
MRGBP		1				1				1		1						1		1				1					1			1							1			6	2	2	4	10
MRPL9		1		1		1				1		1						1						1					1							1			1			6	2	2	4	10
MYD88	1		1		1				1		1						1							1					1			1							1			6	2	2	4	10
N4BP2L1	1				1				1		1						1		1				1					1											1	1		6	2	2	4	10
NFIB	1		1		1		1		1		1										1		1					1												1		6	3	1	4	10
NRGN	1		1		1				1		1						1											1				1						1		1		6	1	3	4	10
NUP205		1		1		1				1		1						1						1					1							1				1		6	2	2	4	10
OSBPL1A	1		1		1				1		1						1						1					1										1		1		6	2	2	4	10
PCLAF		1				1				1		1						1		1				1					1								1	1				6	2	2	4	10
PCYOX1	1		1		1			1	1								1						1					1											1		1	6	2	2	4	10
PDE4B	1		1		1				1		1						1							1								1				1				1		6	1	3	4	10
PLCL2	1				1		1		1		1						1						1					1											1	1		6	2	2	4	10
PLPP3	1				1				1		1				1		1						1		1			1										1				6	3	1	4	10
PPP1R16B	1		1		1				1		1						1						1					1								1			1			6	2	2	4	10
RAP2B		1				1		1		1		1						1						1		1			1			1										6	3	1	4	10
RBM5	1		1		1		1		1		1												1		1			1											1			6	3	1	4	10
RCBTB2	1				1		1		1		1						1				1		1					1								1						6	3	1	4	10
RFC5		1		1		1		1		1								1											1				1			1			1			6	1	3	4	10
SATB1	1			1	1		1		1								1						1					1				1									1	6	2	2	4	10
SCRN1		1		1		1		1		1								1															1			1			1	1		6	0	4	4	10
SH3BP5	1				1		1		1		1						1						1					1					1						1			6	2	2	4	10
SIRPA	1		1		1				1		1						1				1		1					1				1										6	3	1	4	10
SLBP		1		1		1		1		1		1												1					1			1							1			6	2	2	4	10
SNRPB		1				1		1		1		1						1						1					1			1							1			6	2	2	4	10
SNRPN	1				1		1		1		1								1									1					1						1	1		6	1	3	4	10
SPSB1		1	1							1		1						1		1			1			1			1												1	6	3	1	4	10
STX7	1		1		1				1		1						1						1										1						1	1		6	1	3	4	10
TIPARP	1		1		1				1		1				1								1					1					1			1						6	2	2	4	10
TNFSF12	1		1		1				1		1						1						1					1								1				1		6	2	2	4	10
TPK1	1		1		1				1		1						1						1					1				1							1			6	2	2	4	10
TRIP13		1				1				1		1		1				1						1		1			1									1				6	3	1	4	10
VAMP3	1		1		1				1		1						1						1					1				1							1			6	2	2	4	10
VCL	1		1		1			1	1		1												1					1				1								1		6	2	2	4	10
VEGFD	1				1				1		1				1		1						1		1			1										1				6	3	1	4	10
VPS72		1				1		1		1		1						1						1					1										1	1		6	2	2	4	10
XPC	1				1		1		1		1						1											1					1						1	1		6	1	3	4	10
ZEB1	1				1				1		1		1				1						1					1				1						1				6	2	2	4	10
ZNF217		1				1		1		1		1						1						1					1										1	1		6	2	2	4	10
ZZEF1	1				1		1		1		1						1						1					1				1							1			6	2	2	4	10
ADGRE5	1				1				1		1				1		1						1					1				1										6	2	1	3	9
ADIRF	1				1				1		1				1		1						1		1			1														6	3	0	3	9
ADNP		1		1		1		1		1		1												1									1						1			6	1	2	3	9
ADRM1		1	1			1		1		1		1												1					1												1	6	2	1	3	9
AGPAT5		1		1		1		1		1								1						1									1						1			6	1	2	3	9
AKAP13	1		1		1				1		1						1						1					1											1			6	2	1	3	9
AMMECR1		1	1			1		1		1								1															1						1	1		6	0	3	3	9
ANK2	1			1	1		1		1										1				1		1			1														6	3	0	3	9
AQP9	1		1						1		1		1				1												1									1		1		6	1	2	3	9
ARHGAP29	1		1		1				1		1						1						1		1			1														6	3	0	3	9
ARTN		1				1				1		1						1		1								1									1				1	6	1	2	3	9
ATP2A2		1		1		1				1		1						1						1								1									1	6	1	2	3	9
AUNIP		1				1				1		1						1		1				1					1									1				6	2	1	3	9
CADM1	1				1			1	1		1						1									1												1			1	6	1	2	3	9
CADPS2		1	1		1		1				1								1					1				1										1				6	2	1	3	9
CALU		1	1			1		1		1								1								1			1												1	6	2	1	3	9
CAPG			1					1	1		1						1			1				1		1															1	6	2	1	3	9
CAPN3	1		1				1		1		1						1						1					1											1			6	2	1	3	9
CARD8	1		1		1				1		1						1						1					1												1		6	2	1	3	9
CBX1		1		1		1				1		1						1						1															1	1		6	1	2	3	9
CBX3		1	1			1		1		1								1						1					1				1									6	2	1	3	9
CCND3	1		1		1				1		1						1						1					1											1			6	2	1	3	9
CCT6A		1		1		1		1		1								1						1					1										1			6	2	1	3	9
CD34	1				1		1		1		1						1						1		1			1														6	3	0	3	9
CD81	1		1		1				1		1						1						1					1				1										6	2	1	3	9
CDC45		1				1				1		1						1		1				1					1									1				6	2	1	3	9
CEBPD	1		1		1				1		1						1						1					1				1										6	2	1	3	9
CELSR2		1		1		1		1				1						1										1									1				1	6	1	2	3	9
CENPU		1				1				1		1						1		1				1					1										1			6	2	1	3	9
CERKL	1			1			1		1		1								1					1								1						1				6	1	2	3	9
CHST6	1						1		1		1							1	1										1			1							1			6	1	2	3	9
CLIC2	1		1		1				1		1						1						1		1															1		6	2	1	3	9
CLSTN1		1		1		1				1		1						1						1				1											1			6	2	1	3	9
CPSF6		1		1		1		1		1		1												1					1												1	6	2	1	3	9
CSRP1	1		1		1				1		1						1				1		1					1														6	3	0	3	9
CYFIP2				1	1		1		1		1								1					1															1	1		6	1	2	3	9
CYP27B1		1				1				1		1						1		1				1														1			1	6	1	2	3	9
DAB2	1		1		1				1		1						1						1					1										1				6	2	1	3	9
DAP3		1				1		1		1		1						1						1					1			1										6	2	1	3	9
DBF4		1				1		1		1								1		1				1					1							1						6	2	1	3	9
DCTPP1		1				1				1		1						1		1				1					1										1			6	2	1	3	9
DENND5A	1				1			1	1		1						1						1					1				1										6	2	1	3	9
DENR		1		1		1		1		1								1						1															1		1	6	1	2	3	9
DLG5		1		1		1				1		1						1										1										1			1	6	1	2	3	9
DMXL1	1			1	1				1		1						1						1					1											1			6	2	1	3	9
DOCK9	1		1		1				1		1						1						1		1			1														6	3	0	3	9
DUSP6	1		1		1		1		1		1														1			1				1										6	2	1	3	9
EGR2	1		1				1		1		1						1				1							1											1			6	2	1	3	9
EHD2	1		1		1				1		1						1						1					1										1				6	2	1	3	9
EIF2B5		1				1		1		1		1						1						1	1														1			6	2	1	3	9
ENC1		1		1		1				1				1				1						1		1										1						6	2	1	3	9
ENTPD7		1				1				1		1				1		1						1					1									1				6	2	1	3	9
ERO1A		1				1				1		1				1		1						1												1		1				6	1	2	3	9
FBXO41		1		1		1				1		1						1						1															1		1	6	1	2	3	9
FBXO5				1		1		1		1		1						1						1					1										1			6	2	1	3	9
FERMT2	1				1				1		1		1				1						1					1										1				6	2	1	3	9
FNBP1	1		1		1				1		1						1						1					1				1										6	2	1	3	9
FNDC3B		1	1			1		1		1								1					1															1			1	6	1	2	3	9
FXYD1	1		1				1		1		1		1										1		1			1														6	3	0	3	9
FYN	1				1			1	1				1				1						1									1				1						6	1	2	3	9
GAMT		1		1		1				1				1				1						1				1										1				6	2	1	3	9
GAPDH		1		1		1				1		1						1						1					1												1	6	2	1	3	9
GID8		1				1				1		1						1		1				1					1										1			6	2	1	3	9
GMPS		1				1		1		1		1						1						1					1										1			6	2	1	3	9
GPC3	1		1		1				1				1		1								1		1			1														6	3	0	3	9
GPR65	1		1		1				1		1						1							1								1				1						6	1	2	3	9
GRAMD1C	1			1	1		1		1										1		1							1						1								6	2	1	3	9
GTF2IRD1		1		1		1				1		1						1						1		1												1				6	2	1	3	9
GTPBP8		1		1		1		1		1		1											1						1										1			6	2	1	3	9
HEBP1	1		1		1			1	1		1																	1				1						1				6	1	2	3	9
HERC1	1				1			1	1		1						1						1					1											1			6	2	1	3	9
HEY2	1			1	1		1		1										1		1		1					1														6	3	0	3	9
HIF1A		1				1		1		1		1						1						1								1				1						6	1	2	3	9
HLTF		1		1		1		1		1								1						1					1											1		6	2	1	3	9
HPCAL1	1		1		1				1		1						1							1					1										1			6	2	1	3	9
HSDL2	1		1		1				1		1						1						1					1											1			6	2	1	3	9
HSPA5		1		1		1		1		1								1						1								1						1				6	1	2	3	9
ID3	1		1		1				1		1						1											1					1						1			6	1	2	3	9
IFNGR1	1		1		1				1		1						1						1					1				1										6	2	1	3	9
IL3RA	1		1		1				1		1						1						1					1													1	6	2	1	3	9
INPP5A	1		1		1				1		1						1						1					1											1			6	2	1	3	9
INTS7		1		1		1		1		1								1						1					1										1			6	2	1	3	9
INTS8		1				1				1		1		1				1						1					1										1			6	2	1	3	9
ITGAL	1		1		1				1		1						1											1				1						1				6	1	2	3	9
JAG1	1			1				1	1			1	1										1					1													1	6	2	1	3	9
KANK2	1				1		1		1		1						1						1					1										1				6	2	1	3	9
KANK3	1				1				1		1				1		1						1		1			1														6	3	0	3	9
KDELR3		1	1			1				1		1						1								1			1									1				6	2	1	3	9
KIAA0513	1				1				1		1						1		1									1				1						1				6	1	2	3	9
KIF18A		1				1		1		1								1		1				1					1										1			6	2	1	3	9
KLF9	1				1				1				1		1		1						1		1			1														6	3	0	3	9
KPNA2		1		1						1		1						1		1				1					1			1										6	2	1	3	9
KPNB1		1		1		1		1		1								1															1						1	1		6	0	3	3	9
LAT2	1		1		1				1		1						1							1								1						1				6	1	2	3	9
LIPA			1		1			1	1		1						1							1				1				1										6	2	1	3	9
LRPPRC		1		1		1		1		1								1						1					1										1			6	2	1	3	9
LRRC41		1		1		1		1		1		1												1		1		1														6	3	0	3	9
LSM4		1		1		1		1		1										1				1					1			1										6	2	1	3	9
MACF1	1		1		1				1		1						1						1					1				1										6	2	1	3	9
MAGI2				1	1		1		1								1		1				1					1												1		6	2	1	3	9
MAGOHB		1				1		1		1		1						1						1					1										1			6	2	1	3	9
MAOA	1		1		1				1		1						1						1		1			1														6	3	0	3	9
MCTS1		1		1		1				1		1						1						1		1															1	6	2	1	3	9
MED14		1				1		1		1		1						1						1															1	1		6	1	2	3	9
MFNG	1		1		1				1		1						1						1					1				1										6	2	1	3	9
MORC2		1				1		1		1		1						1						1															1	1		6	1	2	3	9
MRPL15		1				1				1		1						1		1				1					1								1					6	2	1	3	9
MTFR1		1		1		1		1		1								1						1					1									1				6	2	1	3	9
MYH11	1		1		1		1		1						1						1		1					1														6	3	0	3	9
MYO1C	1		1		1				1		1						1						1					1										1				6	2	1	3	9
NIF3L1		1		1		1		1		1		1												1															1	1		6	1	2	3	9
NINJ2	1		1		1				1		1						1									1			1									1				6	2	1	3	9
NOL11		1		1		1		1		1								1						1												1			1			6	1	2	3	9
NUP62		1		1		1		1		1										1				1															1	1		6	1	2	3	9
P2RY13	1		1		1				1		1						1						1					1										1				6	2	1	3	9
PCDHGC3	1				1				1		1		1				1						1					1										1				6	2	1	3	9
PDCD6		1		1		1				1		1						1						1															1	1		6	1	2	3	9
PDCD6IP	1		1		1				1		1						1							1								1							1			6	1	2	3	9
PDE4A	1		1		1		1		1		1												1					1					1									6	2	1	3	9
PDE4D	1		1		1		1		1		1																					1						1		1		6	0	3	3	9
PDIA4		1		1		1				1		1						1						1								1						1				6	1	2	3	9
PDLIM2	1				1				1		1				1		1						1			1						1										6	2	1	3	9
PECAM1	1		1		1				1		1		1										1		1			1														6	3	0	3	9
PFDN2		1				1		1		1								1		1									1										1		1	6	1	2	3	9
PGK1		1				1		1		1		1						1						1					1			1										6	2	1	3	9
PHKA1		1		1		1				1		1						1						1														1		1		6	1	2	3	9
PID1	1				1		1		1		1						1						1					1												1		6	2	1	3	9
PIK3R3	1			1	1		1		1						1									1					1											1		6	2	1	3	9
PILRA	1		1						1		1				1		1							1								1						1				6	1	2	3	9
PLP1	1			1	1		1		1										1				1		1			1														6	3	0	3	9
PLTP		1	1			1				1		1								1			1					1													1	6	2	1	3	9
PPM1F	1		1		1				1		1						1						1					1				1										6	2	1	3	9
PPP2R5A	1		1					1	1		1						1						1		1							1										6	2	1	3	9
PRKCZ	1		1		1				1		1						1							1															1	1		6	1	2	3	9
PSMB4		1				1		1		1		1						1						1					1			1										6	2	1	3	9
PSMD11		1				1		1		1		1						1						1															1	1		6	1	2	3	9
R3HDM1		1		1		1		1		1								1											1										1		1	6	1	2	3	9
RAPGEF2	1				1		1		1		1						1						1					1												1		6	2	1	3	9
RASGRF1	1		1		1				1		1						1						1										1						1			6	1	2	3	9
RASSF1	1		1		1				1		1		1										1					1													1	6	2	1	3	9
RBM6	1		1		1		1		1		1												1		1			1														6	3	0	3	9
RCN2				1		1		1		1		1						1						1					1			1										6	2	1	3	9
RFTN1	1		1		1				1		1						1						1									1								1		6	1	2	3	9
RIN3	1		1		1				1		1						1						1																1	1		6	1	2	3	9
RNF13	1		1		1			1	1								1						1					1												1		6	2	1	3	9
RNF130	1		1		1				1		1						1						1																1	1		6	1	2	3	9
RNH1	1		1		1				1		1						1						1					1											1			6	2	1	3	9
RRAS	1		1		1				1		1						1						1					1				1										6	2	1	3	9
RUSC1		1		1		1				1		1						1						1					1												1	6	2	1	3	9
SAR1A	1		1		1			1	1			1																1								1			1			6	1	2	3	9
SCNM1		1	1			1		1		1		1												1					1			1										6	2	1	3	9
SEC14L1	1			1	1				1		1						1						1					1												1		6	2	1	3	9
SELENOP	1				1				1		1				1		1						1		1			1														6	3	0	3	9
SEMA6A	1		1		1				1				1				1						1		1																1	6	2	1	3	9
SEMA6D	1				1			1	1				1		1								1					1										1				6	2	1	3	9
SGPL1		1		1		1				1		1						1						1					1										1			6	2	1	3	9
SIDT2	1		1		1				1		1						1						1					1											1			6	2	1	3	9
SLC25A20	1		1		1				1		1						1						1					1										1				6	2	1	3	9
SLC7A7	1		1						1		1				1		1							1					1										1			6	2	1	3	9
SNRNP25		1				1				1		1		1				1						1					1										1			6	2	1	3	9
SNRPE		1		1						1		1						1		1				1					1										1			6	2	1	3	9
SOCS3	1		1		1		1		1								1								1													1		1		6	1	2	3	9
SOSTDC1	1		1		1				1				1		1						1							1		1												6	3	0	3	9
SPAST		1		1		1		1		1								1											1										1	1		6	1	2	3	9
SPINT1		1				1		1		1								1		1				1				1					1									6	2	1	3	9
SPTAN1	1		1		1				1		1						1						1					1											1			6	2	1	3	9
SPTBN1	1		1		1				1		1						1						1		1			1														6	3	0	3	9
STEAP1B		1				1				1		1						1		1												1		1				1				6	0	3	3	9
SUB1		1		1		1		1		1		1																				1						1			1	6	0	3	3	9
TAF2		1		1		1		1		1								1						1					1										1			6	2	1	3	9
TIMP3	1		1		1				1		1						1						1					1										1				6	2	1	3	9
TKT		1	1			1		1		1										1			1					1				1										6	2	1	3	9
TMEM204	1				1				1		1		1				1						1					1												1		6	2	1	3	9
TNS2	1				1				1		1				1		1						1		1			1														6	3	0	3	9
TP63		1				1		1		1		1						1			1							1													1	6	2	1	3	9
TRAK2	1		1		1				1		1						1						1																1	1		6	1	2	3	9
TRIM22	1		1		1				1		1						1																			1			1	1		6	0	3	3	9
UBE2I		1		1		1		1		1		1												1					1										1			6	2	1	3	9
UBFD1		1		1		1				1		1						1						1					1												1	6	2	1	3	9
UMPS		1				1		1		1		1						1						1					1											1		6	2	1	3	9
UNC119		1		1		1		1		1								1										1				1						1				6	1	2	3	9
VGLL3	1		1		1				1		1						1						1					1											1			6	2	1	3	9
VIM	1		1		1				1		1						1						1					1													1	6	2	1	3	9
WDHD1		1		1		1		1		1								1						1					1											1		6	2	1	3	9
WFS1	1		1		1				1		1						1								1			1										1				6	2	1	3	9
XPO1		1		1		1		1		1								1						1					1										1			6	2	1	3	9
YWHAZ		1				1		1		1		1						1						1					1										1			6	2	1	3	9
ZEB2	1		1		1				1		1						1						1													1			1			6	1	2	3	9
ZNF146		1		1		1		1		1								1						1					1											1		6	2	1	3	9
ZNF207		1		1		1		1		1		1												1								1									1	6	1	2	3	9
ZSCAN18	1			1	1		1		1		1														1			1											1			6	2	1	3	9
ZYX	1		1		1				1		1						1											1				1						1				6	1	2	3	9
ABCC5		1		1		1		1				1						1						1																1		6	1	1	2	8
ABCE1		1				1		1		1		1						1						1					1													6	2	0	2	8
ABHD5	1		1		1				1		1						1						1																	1		6	1	1	2	8
ABHD6	1				1		1		1		1						1						1					1														6	2	0	2	8
ADD1	1		1		1				1		1						1						1					1														6	2	0	2	8
ADGRB3	1				1				1		1						1		1				1						1													6	2	0	2	8
AHNAK2		1				1				1		1				1		1					1															1				6	1	1	2	8
AIF1	1		1		1				1		1						1															1						1				6	0	2	2	8
AK1	1		1				1		1		1						1						1										1									6	1	1	2	8
ALDH3B2		1				1				1		1						1		1				1				1														6	2	0	2	8
ANOS1	1				1				1		1						1		1				1					1														6	2	0	2	8
AP2S1		1				1		1		1		1								1				1															1			6	1	1	2	8
APBA2		1		1		1		1		1								1																				1		1		6	0	2	2	8
APOBEC3B								1		1		1		1				1		1				1					1													6	2	0	2	8
AQP1	1		1		1		1		1		1												1					1														6	2	0	2	8
ARHGAP15	1		1		1				1		1						1																						1	1		6	0	2	2	8
ARHGAP24	1		1		1				1		1						1						1																1			6	1	1	2	8
ARHGEF10	1		1		1				1		1						1						1					1														6	2	0	2	8
ARHGEF16		1		1		1				1		1						1						1														1				6	1	1	2	8
ARL6IP5	1		1		1				1		1						1						1					1														6	2	0	2	8
ATP1B3	1		1			1		1	1			1																	1										1			6	1	1	2	8
ATP2C2			1		1		1		1		1								1					1									1									6	1	1	2	8
AXL	1		1		1				1		1						1						1					1														6	2	0	2	8
B4GALT4		1		1		1				1		1						1						1														1				6	1	1	2	8
BARD1		1		1		1		1		1								1						1															1			6	1	1	2	8
BMP6	1		1		1				1		1		1										1															1				6	1	1	2	8
BRIP1		1				1		1		1								1		1									1										1			6	1	1	2	8
BYSL		1		1		1				1		1						1						1					1													6	2	0	2	8
C5orf22		1		1		1		1		1								1						1															1			6	1	1	2	8
CASKIN2	1				1				1				1		1		1						1					1														6	2	0	2	8
CBFB		1		1		1		1		1	1													1															1			6	1	1	2	8
CCDC170	1				1				1		1						1		1				1					1														6	2	0	2	8
CD37	1		1		1				1		1						1							1															1			6	1	1	2	8
CD3EAP		1				1				1		1						1		1				1					1													6	2	0	2	8
CDK1		1				1				1		1						1		1				1					1													6	2	0	2	8
CDYL				1		1		1		1		1								1				1															1			6	1	1	2	8
CELF2	1				1				1		1				1		1						1																1			6	1	1	2	8
CITED2	1				1		1		1		1						1															1						1				6	0	2	2	8
CMAS				1		1		1		1		1						1											1											1		6	1	1	2	8
COL4A3BP	1				1		1		1		1						1						1																1			6	1	1	2	8
COPB2		1				1		1		1		1						1						1																1		6	1	1	2	8
CRIM1	1		1		1				1		1						1						1					1														6	2	0	2	8
CRIPT		1		1		1				1		1						1											1										1			6	1	1	2	8
CRY2	1				1		1		1		1						1						1					1														6	2	0	2	8
CRYZL1	1		1		1		1		1		1												1																1			6	1	1	2	8
CSF3R	1		1		1				1		1						1															1						1				6	0	2	2	8
CTNNAL1	1		1		1				1				1				1						1					1														6	2	0	2	8
CTPS1		1				1				1		1						1		1				1					1													6	2	0	2	8
CTSG	1		1		1				1						1		1						1					1														6	2	0	2	8
CTSW	1		1		1				1		1						1																			1		1				6	0	2	2	8
CTSZ		1	1			1		1	1								1							1																	1	6	1	1	2	8
DAAM2	1		1		1				1		1						1						1					1														6	2	0	2	8
DARS2		1		1		1		1		1								1						1					1													6	2	0	2	8
DCN	1		1		1				1		1						1						1					1														6	2	0	2	8
DHCR24	1		1		1				1		1						1							1				1														6	2	0	2	8
DKC1		1		1		1		1		1								1						1															1			6	1	1	2	8
DKK2	1				1				1		1		1				1						1					1														6	2	0	2	8
DNA2		1				1				1		1						1		1				1					1													6	2	0	2	8
DNAH9	1				1		1		1				1				1						1															1				6	1	1	2	8
DNASE1L3	1		1		1				1						1		1						1					1														6	2	0	2	8
DONSON		1		1		1		1		1								1						1					1													6	2	0	2	8
DPT	1		1		1		1		1				1										1					1														6	2	0	2	8
DRAP1		1				1		1		1		1								1				1															1			6	1	1	2	8
DYNC2LI1	1			1	1		1		1										1									1											1			6	1	1	2	8
EBNA1BP2		1		1		1				1		1						1						1															1			6	1	1	2	8
ECM2	1		1		1				1		1						1						1					1														6	2	0	2	8
EFEMP1	1		1		1				1		1						1						1					1														6	2	0	2	8
EFNA3		1				1				1		1						1		1				1														1				6	1	1	2	8
ELK1		1		1		1		1		1		1												1																	1	6	1	1	2	8
ELN	1				1		1		1						1				1				1					1														6	2	0	2	8
EMP3	1		1		1				1		1						1						1																		1	6	1	1	2	8
EPHA1		1	1			1				1		1						1						1																1		6	1	1	2	8
EPHB3		1				1		1		1		1						1										1													1	6	1	1	2	8
EPHX2	1			1	1		1		1										1				1					1														6	2	0	2	8
ERG	1				1				1		1		1				1						1					1														6	2	0	2	8
ETF1	1		1		1			1	1		1												1					1														6	2	0	2	8
F5		1		1		1				1						1			1					1																1		6	1	1	2	8
FAT4	1				1		1		1		1						1						1					1														6	2	0	2	8
FBLN1	1		1		1				1		1						1						1					1														6	2	0	2	8
FCER1G	1		1						1		1						1			1												1						1				6	0	2	2	8
FOLR3	1		1		1				1						1		1						1																	1		6	1	1	2	8
FOXA1		1		1			1			1								1	1					1				1														6	2	0	2	8
FOXRED2		1		1		1				1		1						1						1														1				6	1	1	2	8
GALC			1		1		1		1		1						1											1												1		6	1	1	2	8
GAS6	1		1		1				1		1						1						1					1														6	2	0	2	8
GCLC		1		1		1				1		1						1															1						1			6	0	2	2	8
GGT1	1		1				1		1		1				1													1				1										6	1	1	2	8
GJA4	1				1		1		1				1				1						1					1														6	2	0	2	8
GOLM1		1					1			1				1		1		1						1				1														6	2	0	2	8
GOT2		1		1		1				1		1						1						1				1														6	2	0	2	8
GPN1		1				1		1		1		1						1											1										1			6	1	1	2	8
GRN	1		1					1	1		1						1							1				1														6	2	0	2	8
GSS		1		1		1				1								1		1								1													1	6	1	1	2	8
GSTM5	1		1		1				1		1		1										1					1														6	2	0	2	8
GYG2		1		1		1				1				1				1					1					1														6	2	0	2	8
GYPE	1		1		1				1						1		1						1																	1		6	1	1	2	8
H2AFV		1		1	1			1		1		1																	1										1			6	1	1	2	8
H2AFX		1						1		1		1						1		1				1					1													6	2	0	2	8
H2AFY2		1		1		1				1		1								1						1															1	6	1	1	2	8
HELLS		1		1		1		1		1								1						1					1													6	2	0	2	8
HIF3A	1				1		1		1				1				1						1		1																	6	2	0	2	8
HIST1H2AE		1		1		1		1		1		1												1														1				6	1	1	2	8
HMGA2		1				1		1		1								1		1				1																1		6	1	1	2	8
HOMER3		1	1			1		1		1		1																	1												1	6	1	1	2	8
HOXA5	1		1		1				1		1						1						1					1														6	2	0	2	8
HOXC11		1				1				1		1						1		1				1																	1	6	1	1	2	8
HPGDS	1				1				1		1				1		1						1					1														6	2	0	2	8
HSP90AB1		1		1		1		1		1								1						1															1			6	1	1	2	8
HSP90B1		1		1		1		1		1								1														1						1				6	0	2	2	8
HSPB7	1				1				1		1				1		1						1					1														6	2	0	2	8
HYAL2	1		1						1		1				1		1						1					1														6	2	0	2	8
IGFBP6	1		1		1		1		1		1												1					1														6	2	0	2	8
IL11RA	1		1		1				1		1								1				1					1														6	2	0	2	8
IL6	1		1		1				1		1						1											1										1				6	1	1	2	8
IL6ST	1				1		1		1		1						1						1					1														6	2	0	2	8
IMP4		1	1			1		1		1		1											1									1										6	1	1	2	8
IQGAP1	1		1		1			1	1		1																	1				1										6	1	1	2	8
IRF6		1		1		1				1		1						1						1				1														6	2	0	2	8
JAK2	1		1		1				1		1						1																1						1			6	0	2	2	8
JUNB	1				1		1		1		1						1											1				1										6	1	1	2	8
JUND	1				1				1		1				1		1						1					1														6	2	0	2	8
KIF20B		1				1		1		1								1		1				1					1													6	2	0	2	8
KLK11	1		1		1		1		1										1		1							1														6	2	0	2	8
KLRB1	1		1		1				1		1						1																			1		1				6	0	2	2	8
LAGE3		1		1		1				1		1						1						1					1													6	2	0	2	8
LAMA2	1		1		1		1		1								1						1					1														6	2	0	2	8
LAMB2	1		1		1				1		1						1						1					1														6	2	0	2	8
LIG1		1		1		1				1		1						1						1															1			6	1	1	2	8
LIMK1		1				1		1		1								1		1			1						1													6	2	0	2	8
LITAF	1		1		1				1		1						1											1					1									6	1	1	2	8
LTBP2	1		1		1		1		1								1						1					1														6	2	0	2	8
LY86	1		1		1				1		1						1							1								1										6	1	1	2	8
LZTFL1	1				1		1		1		1								1				1					1														6	2	0	2	8
MAL	1		1		1				1				1				1																					1		1		6	0	2	2	8
ME1		1				1		1		1		1								1			1																		1	6	1	1	2	8
MEIS2	1			1	1		1		1		1												1					1														6	2	0	2	8
METAP1		1				1		1		1		1						1										1				1										6	1	1	2	8
METTL8		1				1		1		1								1		1													1						1			6	0	2	2	8
MMP12		1		1		1		1		1		1												1					1													6	2	0	2	8
MPP6		1		1		1		1		1								1					1															1				6	1	1	2	8
MRPL42		1		1		1				1		1						1						1					1													6	2	0	2	8
MRPS34		1				1		1		1		1						1						1					1													6	2	0	2	8
MUC13		1		1			1			1								1	1				1															1				6	1	1	2	8
MVB12B	1				1				1		1				1		1						1																		1	6	1	1	2	8
MXRA5		1				1				1		1				1		1						1							1											6	2	0	2	8
MYL6B		1		1		1				1		1						1										1					1									6	1	1	2	8
MYO1F	1		1		1				1		1						1															1						1				6	0	2	2	8
MYRIP	1				1		1		1								1		1				1		1																	6	2	0	2	8
NASP		1		1		1				1		1						1							1														1			6	1	1	2	8
NDNF	1				1				1		1				1		1						1					1														6	2	0	2	8
NDST1	1		1		1				1		1						1						1					1														6	2	0	2	8
NDUFS2		1		1		1		1		1		1												1															1			6	1	1	2	8
NDUFS5		1				1		1		1		1								1			1																1			6	1	1	2	8
NEBL	1				1				1		1		1				1							1				1														6	2	0	2	8
NFASC	1				1		1		1						1				1						1			1														6	2	0	2	8
NFKBIA	1		1		1				1		1						1				1											1										6	1	1	2	8
NMB		1	1			1				1		1								1			1																		1	6	1	1	2	8
NMU		1		1		1				1		1						1											1											1		6	1	1	2	8
NPC2			1						1		1			1			1			1								1				1										6	1	1	2	8
NPR2	1		1		1		1		1										1				1					1														6	2	0	2	8
NR2F2	1				1		1		1		1						1								1			1														6	2	0	2	8
NR4A2	1				1		1		1		1								1									1				1										6	1	1	2	8
NUP210		1		1		1		1		1		1												1															1			6	1	1	2	8
NUP37		1				1		1		1		1						1						1					1													6	2	0	2	8
NVL		1		1		1		1		1				1										1																1		6	1	1	2	8
OGN	1				1				1		1				1		1						1					1														6	2	0	2	8
OLFML1	1		1		1				1		1						1						1					1														6	2	0	2	8
P3H2	1								1		1				1		1			1			1					1														6	2	0	2	8
PAK1		1		1		1				1		1						1						1					1													6	2	0	2	8
PANX1				1		1		1		1		1								1				1												1						6	1	1	2	8
PARPBP		1				1				1		1						1		1				1					1													6	2	0	2	8
PGC	1		1		1				1		1				1								1															1				6	1	1	2	8
PGM5	1		1		1										1		1		1				1		1																	6	2	0	2	8
PITX1		1		1		1				1						1		1						1					1													6	2	0	2	8
PKIG	1				1				1		1		1				1											1											1			6	1	1	2	8
PKM		1				1				1		1						1		1				1								1										6	1	1	2	8
PLEKHA6		1		1			1			1								1	1					1				1														6	2	0	2	8
PMP22	1		1		1				1		1						1						1					1														6	2	0	2	8
POLR2F		1			1			1		1		1								1																			1	1		6	0	2	2	8
POLR2H		1		1		1				1		1						1						1															1			6	1	1	2	8
PPP2R1A		1		1		1		1		1		1												1				1														6	2	0	2	8
PPP4C		1				1		1		1		1								1				1															1			6	1	1	2	8
PREX2	1				1		1						1				1		1				1						1													6	2	0	2	8
PRKCH	1		1		1				1		1						1											1												1		6	1	1	2	8
PRPF4		1		1		1		1		1								1						1								1										6	1	1	2	8
PRPS2		1		1		1		1		1								1						1															1			6	1	1	2	8
PRSS12	1				1		1		1						1				1				1					1														6	2	0	2	8
PSMB5		1				1		1		1		1						1						1		1																6	2	0	2	8
PSMD14		1		1				1		1		1						1						1					1													6	2	0	2	8
PSMD3		1		1		1		1		1								1											1												1	6	1	1	2	8
PSMD7		1				1		1		1		1								1				1															1			6	1	1	2	8
PSPH		1		1		1				1		1						1											1										1			6	1	1	2	8
PTBP1		1		1		1		1		1		1												1															1			6	1	1	2	8
PTGES		1	1			1				1				1				1					1					1														6	2	0	2	8
PTK7		1				1		1		1								1		1				1													1					6	1	1	2	8
PTPRN2	1			1	1		1		1										1													1						1				6	0	2	2	8
QKI	1		1					1	1				1				1						1									1										6	1	1	2	8
RAB25		1				1				1		1						1		1				1													1					6	1	1	2	8
RAC3		1		1						1		1				1		1						1					1													6	2	0	2	8
RAD51		1				1				1		1						1		1				1					1													6	2	0	2	8
RASGRP2	1		1		1				1				1				1						1																1			6	1	1	2	8
RBP4	1				1				1		1						1		1				1					1														6	2	0	2	8
RDX	1		1		1				1		1						1						1													1						6	1	1	2	8
REPS2	1		1		1		1		1								1							1																1		6	1	1	2	8
RETREG1	1				1				1		1				1		1															1								1		6	0	2	2	8
REV3L	1			1	1				1		1						1						1																1			6	1	1	2	8
RHOB	1		1		1		1		1		1																	1				1										6	1	1	2	8
RHOBTB2	1		1		1				1		1						1																1						1			6	0	2	2	8
RIPOR2	1				1				1		1						1		1																				1	1		6	0	2	2	8
RORA	1		1		1				1			1					1																			1		1				6	0	2	2	8
RPL37		1		1		1				1		1						1					1					1														6	2	0	2	8
RPN2		1				1		1		1		1						1						1																	1	6	1	1	2	8
RPP40		1		1		1				1		1						1						1					1													6	2	0	2	8
RPS6KA2	1		1		1				1		1						1						1					1														6	2	0	2	8
RUNX1T1	1				1		1		1				1				1						1					1														6	2	0	2	8
RUVBL1		1		1		1				1		1						1						1					1													6	2	0	2	8
S100A11		1	1			1				1		1								1				1								1										6	1	1	2	8
S100A8	1		1					1	1				1							1												1						1				6	0	2	2	8
SAE1		1		1		1		1		1		1												1															1			6	1	1	2	8
SCEL	1		1						1		1				1		1						1																1			6	1	1	2	8
SCNN1B	1		1		1		1		1		1												1					1														6	2	0	2	8
SDCBP	1		1		1				1		1						1						1									1										6	1	1	2	8
SEC24D		1		1		1		1		1								1						1					1													6	2	0	2	8
SEMA3B	1		1		1				1		1						1						1					1														6	2	0	2	8
SERPINB5		1		1		1				1		1						1										1		1												6	2	0	2	8
SERPING1	1		1		1				1		1						1						1					1														6	2	0	2	8
SFTPC	1		1		1				1		1						1											1													1	6	1	1	2	8
SH2B3	1		1		1				1		1						1						1									1										6	1	1	2	8
SH2D3C	1		1		1					1			1				1						1						1													6	2	0	2	8
SH3BGRL	1		1		1				1		1						1											1											1			6	1	1	2	8
SHCBP1		1				1		1		1								1		1				1					1													6	2	0	2	8
SIAH2						1		1		1		1						1		1												1								1		6	0	2	2	8
SIPA1L3		1				1				1		1		1						1				1									1									6	1	1	2	8
SLC11A1	1		1		1				1		1						1																					1		1		6	0	2	2	8
SLC25A13		1		1		1		1		1								1						1															1			6	1	1	2	8
SLC2A5		1				1				1		1				1		1														1						1				6	0	2	2	8
SLC39A6		1		1		1		1		1								1						1				1														6	2	0	2	8
SLCO2B1	1		1						1		1				1		1											1													1	6	1	1	2	8
SLCO4C1	1		1		1				1		1				1														1											1		6	1	1	2	8
SNX10	1		1					1	1		1						1												1										1			6	1	1	2	8
SNX2	1		1		1				1		1						1						1									1										6	1	1	2	8
SORBS1	1				1		1		1						1		1						1					1														6	2	0	2	8
SPATA6	1		1		1		1		1								1											1										1				6	1	1	2	8
SRGN	1		1		1				1		1						1							1								1										6	1	1	2	8
SSBP2	1			1	1		1		1										1									1				1										6	1	1	2	8
SSX2IP		1		1		1		1		1								1						1					1													6	2	0	2	8
STAC	1				1				1		1				1		1						1																	1		6	1	1	2	8
STEAP4	1		1		1		1				1			1														1												1		6	1	1	2	8
STX12	1		1		1				1		1						1						1					1														6	2	0	2	8
SULT1A1	1		1				1		1		1						1								1							1										6	1	1	2	8
SULT1A2	1		1		1				1		1						1						1									1										6	1	1	2	8
SUSD4		1		1		1				1		1						1											1									1				6	1	1	2	8
SYNC	1				1				1		1				1		1						1																1			6	1	1	2	8
TALDO1		1	1			1		1		1										1												1								1		6	0	2	2	8
TBC1D1	1				1				1		1		1				1																1						1			6	0	2	2	8
TBC1D2B	1		1		1				1		1						1						1					1														6	2	0	2	8
TBC1D9	1		1		1				1		1						1											1												1		6	1	1	2	8
TBX3	1		1		1				1				1				1											1										1				6	1	1	2	8
TDO2		1				1		1		1								1		1				1					1													6	2	0	2	8
TDP1		1		1		1				1		1						1						1					1													6	2	0	2	8
TEDC2		1								1		1				1		1		1				1					1													6	2	0	2	8
TFG		1				1		1		1		1						1						1					1													6	2	0	2	8
TIPIN		1		1		1		1		1		1												1					1													6	2	0	2	8
TJP1	1		1		1				1		1						1						1					1														6	2	0	2	8
TLE2	1			1	1		1		1		1																	1									1					6	1	1	2	8
TMED2		1				1		1		1		1						1						1																	1	6	1	1	2	8
TMEM177		1		1		1				1		1						1						1																1		6	1	1	2	8
TNS3	1		1		1				1		1						1									1						1										6	1	1	2	8
TP53BP1		1		1		1	1			1		1												1															1			6	1	1	2	8
TPI1		1				1				1		1						1		1				1					1													6	2	0	2	8
TRIOBP	1		1		1			1	1								1						1					1														6	2	0	2	8
TSKU		1				1		1		1		1						1										1													1	6	1	1	2	8
TSPAN4	1		1		1				1		1						1						1					1														6	2	0	2	8
TUBB		1				1		1		1		1						1											1										1			6	1	1	2	8
TUFT1		1				1				1		1						1		1				1														1				6	1	1	2	8
ULK4	1				1		1		1				1						1					1					1													6	2	0	2	8
UNC13B	1		1		1				1		1						1											1										1				6	1	1	2	8
VBP1		1		1		1		1		1								1											1										1			6	1	1	2	8
VSTM4	1				1				1		1		1				1						1					1														6	2	0	2	8
WASF3	1				1		1		1		1						1						1					1														6	2	0	2	8
WDR7	1			1	1		1		1		1																												1	1		6	0	2	2	8
WIF1	1		1		1				1		1				1								1					1														6	2	0	2	8
WWC3	1		1		1				1		1						1											1												1		6	1	1	2	8
XPOT		1				1		1		1		1						1						1					1													6	2	0	2	8
YEATS4		1		1		1		1		1		1												1															1			6	1	1	2	8
ZNF695		1						1		1						1		1		1									1				1									6	1	1	2	8
AATK	1				1				1		1				1		1																					1				6	0	1	1	7
ACP5	1		1		1				1		1						1							1																		6	1	0	1	7
ADAM23				1		1		1		1		1						1					1																			6	1	0	1	7
ADGB	1				1				1				1				1		1				1																			6	1	0	1	7
ADGRG6	1				1				1		1						1		1																					1		6	0	1	1	7
AKR1B10		1				1				1		1						1		1																		1				6	0	1	1	7
ANAPC1		1		1				1		1		1						1																					1			6	0	1	1	7
APOLD1	1				1				1						1		1		1									1														6	1	0	1	7
ARHGAP11A		1				1		1		1								1		1			1																			6	1	0	1	7
ARHGEF2	1		1		1				1		1						1						1																			6	1	0	1	7
ASAH1	1		1		1				1		1						1															1										6	0	1	1	7
ATXN10		1		1		1		1		1		1																				1										6	0	1	1	7
B2M	1		1		1				1		1						1												1													6	1	0	1	7
B4GALNT1		1		1		1				1								1		1																		1				6	0	1	1	7
BCAP31		1	1			1		1		1										1																					1	6	0	1	1	7
BCL11A		1		1		1		1		1		1																											1			6	0	1	1	7
BNIP3				1		1				1		1						1		1																			1			6	0	1	1	7
BRCA2		1				1		1		1								1		1									1													6	1	0	1	7
BTBD3	1			1	1		1		1		1																											1				6	0	1	1	7
BTN3A3	1		1						1		1		1				1																							1		6	0	1	1	7
C11orf24		1				1		1		1		1						1															1									6	0	1	1	7
CA3	1				1				1		1						1		1				1																			6	1	0	1	7
CACNA1D	1				1		1								1		1		1					1																		6	1	0	1	7
CACNB4					1		1		1						1		1		1				1																			6	1	0	1	7
CAMP	1		1		1				1						1		1																							1		6	0	1	1	7
CAPN1		1	1			1		1		1		1												1																		6	1	0	1	7
CD5L	1				1				1				1		1		1												1													6	1	0	1	7
CDC14A	1		1		1		1										1		1									1														6	1	0	1	7
CDK16		1				1				1		1						1		1																					1	6	0	1	1	7
CDK2AP1		1		1				1		1		1						1																			1					6	0	1	1	7
CDT1		1		1		1				1		1						1						1																		6	1	0	1	7
CEP72		1		1		1				1				1				1						1																		6	1	0	1	7
CHI3L2	1		1		1				1		1						1						1																			6	1	0	1	7
CHML				1		1		1		1								1		1									1													6	1	0	1	7
CKS1B		1		1						1		1						1		1									1													6	1	0	1	7
CLNS1A		1		1		1				1		1						1														1										6	0	1	1	7
CLTC		1		1		1		1		1				1										1																		6	1	0	1	7
CNTFR				1	1		1			1					1				1				1																			6	1	0	1	7
COL21A1			1		1		1		1		1								1				1																			6	1	0	1	7
COL3A1		1				1		1		1		1						1													1											6	1	0	1	7
COL4A3	1		1		1				1		1						1																								1	6	0	1	1	7
COL6A3		1	1			1		1		1								1													1											6	1	0	1	7
CPED1	1				1				1						1		1		1				1																			6	1	0	1	7
CPOX		1				1		1		1		1						1																						1		6	0	1	1	7
CRIP2	1		1		1		1		1		1													1																		6	1	0	1	7
CSF3	1				1				1		1				1		1																					1				6	0	1	1	7
CTGF	1		1		1		1		1		1																	1														6	1	0	1	7
CTSA		1	1			1		1		1										1																					1	6	0	1	1	7
CUL7		1		1		1				1		1						1																			1					6	0	1	1	7
CYP2B6	1				1		1		1		1								1									1														6	1	0	1	7
DAPK1	1		1		1				1		1						1																					1				6	0	1	1	7
DDB1		1		1		1		1		1		1												1																		6	1	0	1	7
DDX56		1		1		1				1		1						1						1																		6	1	0	1	7
DNAH2		1	1		1		1											1	1																						1	6	0	1	1	7
DNMT3B		1				1				1		1						1		1				1																		6	1	0	1	7
DOCK2	1		1		1				1		1						1															1										6	0	1	1	7
DPH2		1		1		1				1		1						1						1																		6	1	0	1	7
DRD2		1		1	1		1				1								1				1																			6	1	0	1	7
DSN1		1				1		1		1								1		1									1													6	1	0	1	7
DVL3		1				1		1		1		1						1										1														6	1	0	1	7
ECE2		1		1		1						1						1		1				1																		6	1	0	1	7
ECHDC1	1				1				1		1			1			1						1																			6	1	0	1	7
EDNRA	1		1		1				1		1						1																					1				6	0	1	1	7
EFHC2		1	1		1		1			1									1										1													6	1	0	1	7
EFNB2	1		1						1		1		1				1											1														6	1	0	1	7
ELF4	1		1			1		1	1											1									1													6	1	0	1	7
ERAL1		1		1		1		1		1								1											1													6	1	0	1	7
ETNK2		1		1		1				1		1						1						1																		6	1	0	1	7
EVI2B	1		1		1				1		1						1																			1						6	0	1	1	7
FADS2		1		1		1		1		1										1																		1				6	0	1	1	7
FAM13C	1				1		1						1				1		1										1													6	1	0	1	7
FANCA		1				1		1		1								1		1			1																			6	1	0	1	7
FIG4	1			1	1				1		1						1																						1			6	0	1	1	7
FN3KRP		1		1		1		1		1										1																			1			6	0	1	1	7
FOXF2	1		1		1				1						1		1																								1	6	0	1	1	7
G6PD		1	1			1		1		1										1				1																		6	1	0	1	7
GABRR1		1		1		1						1						1		1			1																			6	1	0	1	7
GALNT14		1		1		1				1						1		1											1													6	1	0	1	7
GANAB		1		1		1		1		1								1																				1				6	0	1	1	7
GCAT		1		1		1				1		1						1																			1					6	0	1	1	7
GCLM		1				1		1		1		1						1																						1		6	0	1	1	7
GGA2	1		1		1			1	1								1																						1			6	0	1	1	7
GJB5		1				1				1		1						1		1																		1				6	0	1	1	7
GLB1L2		1					1			1				1				1	1									1														6	1	0	1	7
GLRX3		1				1		1		1		1						1						1																		6	1	0	1	7
GLRX5		1		1		1		1		1										1												1										6	0	1	1	7
GNAI2	1		1		1				1		1						1						1																			6	1	0	1	7
GPR4	1		1		1				1				1				1											1														6	1	0	1	7
GRIA1	1				1				1		1		1				1								1																	6	1	0	1	7
GRSF1		1		1		1		1		1		1												1																		6	1	0	1	7
GYS1		1				1		1		1		1						1																					1			6	0	1	1	7
HAX1		1		1		1		1		1		1												1																		6	1	0	1	7
HCFC1		1		1		1		1		1		1																1														6	1	0	1	7
HIST1H1C		1				1		1		1								1		1				1																		6	1	0	1	7
HIST1H2BG		1		1		1		1		1		1												1																		6	1	0	1	7
HIST1H4H		1				1		1		1								1		1				1																		6	1	0	1	7
HMBS		1		1		1				1		1						1																				1				6	0	1	1	7
HOXA1		1				1				1		1						1		1																					1	6	0	1	1	7
HPS5	1		1		1				1		1						1																						1			6	0	1	1	7
HS3ST1		1		1			1			1								1	1														1									6	0	1	1	7
HSPB1		1		1		1				1		1								1													1									6	0	1	1	7
HYOU1		1		1		1		1		1								1						1																		6	1	0	1	7
IFT88	1				1		1		1		1								1									1														6	1	0	1	7
IGF2BP3		1				1		1		1								1		1																			1			6	0	1	1	7
IL1R1	1		1		1				1		1						1											1														6	1	0	1	7
INSIG1	1				1				1		1				1		1																						1			6	0	1	1	7
INTS13		1				1				1		1						1		1									1													6	1	0	1	7
IRF8	1		1		1				1		1						1																						1			6	0	1	1	7
ITGA10	1		1		1				1		1								1									1														6	1	0	1	7
KCND2		1		1		1				1								1		1			1																			6	1	0	1	7
KCNK1		1		1		1				1		1						1											1													6	1	0	1	7
KDELR2		1				1		1		1		1						1											1													6	1	0	1	7
KDM6B	1				1		1		1		1						1											1														6	1	0	1	7
KIAA1324		1		1	1		1				1								1									1														6	1	0	1	7
KIF13B	1			1	1		1		1		1																	1														6	1	0	1	7
KIF26B		1				1				1				1				1		1						1																6	1	0	1	7
KRT19		1	1			1				1		1						1						1																		6	1	0	1	7
KRT6B		1				1		1		1		1						1																							1	6	0	1	1	7
LAMC3	1		1						1		1		1				1											1														6	1	0	1	7
LGR4		1		1		1				1				1				1					1																			6	1	0	1	7
LIG3		1		1		1		1		1								1						1																		6	1	0	1	7
LMO3			1		1				1		1			1			1						1																			6	1	0	1	7
LPCAT3	1					1		1	1		1						1											1														6	1	0	1	7
LRP2BP	1			1	1		1		1								1							1																		6	1	0	1	7
LRRC2	1				1		1		1								1		1				1																			6	1	0	1	7
LRRC42		1		1		1				1		1						1						1																		6	1	0	1	7
LRRN3	1		1		1				1		1						1						1																			6	1	0	1	7
LSG1		1				1		1		1		1						1																					1			6	0	1	1	7
MAK	1		1		1		1		1										1																					1		6	0	1	1	7
MASP1	1				1					1			1		1		1																					1				6	0	1	1	7
MAST1		1		1		1				1						1		1											1													6	1	0	1	7
MAST2		1		1		1				1		1						1						1																		6	1	0	1	7
MEX3D		1		1		1		1		1								1						1																		6	1	0	1	7
MMP3		1				1				1				1		1		1						1																		6	1	0	1	7
MMP7		1				1		1		1				1						1	1																					6	1	0	1	7
MPPE1	1		1		1		1		1		1																												1			6	0	1	1	7
MRPL24		1				1		1		1		1						1																				1				6	0	1	1	7
MRPS30		1		1		1		1		1		1																				1										6	0	1	1	7
MTMR14	1		1		1				1		1						1															1										6	0	1	1	7
NARF		1		1		1		1		1								1																						1		6	0	1	1	7
NAT10		1		1		1		1		1								1																					1			6	0	1	1	7
NAT9		1		1		1		1		1								1						1																		6	1	0	1	7
NDRG1	1					1		1		1		1						1														1										6	0	1	1	7
NFIX	1		1		1		1		1								1						1																			6	1	0	1	7
NKG7	1		1						1		1		1				1																			1						6	0	1	1	7
NRIP3		1		1		1				1								1		1																					1	6	0	1	1	7
NSDHL		1	1			1		1		1										1																			1			6	0	1	1	7
NT5DC2		1		1		1				1								1		1									1													6	1	0	1	7
NUP62CL		1		1		1	1			1								1																						1		6	0	1	1	7
ORC1		1				1				1		1						1		1																				1		6	0	1	1	7
PA2G4		1				1		1		1		1								1									1													6	1	0	1	7
PCCB		1		1		1		1		1		1														1																6	1	0	1	7
PCDH12	1		1		1				1		1						1						1																			6	1	0	1	7
PCP4		1		1		1				1				1				1																				1				6	0	1	1	7
PDCD11		1				1		1		1		1						1																					1			6	0	1	1	7
PES1		1				1		1		1		1						1																					1			6	0	1	1	7
PFDN4		1		1		1		1		1								1											1													6	1	0	1	7
PFKP		1		1		1				1		1						1																							1	6	0	1	1	7
PHACTR1	1		1		1				1						1		1												1													6	1	0	1	7
PHB2		1		1				1		1		1								1																			1			6	0	1	1	7
PLK3	1		1		1		1		1		1																	1														6	1	0	1	7
PLPP2		1				1				1		1				1		1						1																		6	1	0	1	7
PLXDC2	1		1		1			1	1								1						1																			6	1	0	1	7
PNPLA6	1		1		1				1		1						1																						1			6	0	1	1	7
POFUT1		1		1				1		1								1		1								1														6	1	0	1	7
POLR1C		1		1		1				1		1						1											1													6	1	0	1	7
POU2AF1		1				1				1						1		1	1																					1		6	0	1	1	7
PPARGC1A	1				1		1		1				1						1																	1						6	0	1	1	7
PPP1CA		1	1			1		1		1										1				1																		6	1	0	1	7
PPP1R14D		1				1	1			1						1		1						1																		6	1	0	1	7
PRCC		1		1		1		1		1								1						1																		6	1	0	1	7
PRF1	1		1						1		1		1				1																					1				6	0	1	1	7
PRG4	1				1		1		1						1		1						1																			6	1	0	1	7
PRRG1	1		1		1				1		1						1						1																			6	1	0	1	7
PSME4		1	1			1		1		1		1																								1						6	0	1	1	7
PSMG1		1				1		1		1		1						1																					1			6	0	1	1	7
PTPN1	1		1					1	1		1						1							1																		6	1	0	1	7
PTS		1		1		1				1		1						1						1																		6	1	0	1	7
PUF60		1				1				1		1						1		1																	1					6	0	1	1	7
RANBP1		1				1				1		1						1		1				1																		6	1	0	1	7
RAP1A	1		1		1				1		1						1																						1			6	0	1	1	7
RASSF2	1		1		1				1		1						1															1										6	0	1	1	7
RBM47		1			1		1			1	1			1										1																		6	1	0	1	7
RBMS2	1		1		1				1		1						1																					1				6	0	1	1	7
RECK	1		1		1				1				1				1						1																			6	1	0	1	7
RECQL4		1		1		1				1						1		1						1																		6	1	0	1	7
RGS17		1		1		1				1				1				1					1																			6	1	0	1	7
RHOA	1		1		1				1		1						1						1																			6	1	0	1	7
RMDN3	1				1				1		1				1		1											1														6	1	0	1	7
RNF125	1		1		1				1								1		1																	1						6	0	1	1	7
RNF7		1	1			1		1		1		1														1																6	1	0	1	7
S100A12	1		1		1				1				1				1															1										6	0	1	1	7
S100A2		1				1				1		1				1		1																				1				6	0	1	1	7
S1PR4	1				1		1		1		1						1																							1		6	0	1	1	7
SAC3D1		1		1		1		1		1										1									1													6	1	0	1	7
SATB2		1		1		1				1								1		1			1																			6	1	0	1	7
SCAMP5		1		1		1				1						1		1																				1				6	0	1	1	7
SCN1A	1				1				1		1				1		1												1													6	1	0	1	7
SCN7A	1				1		1		1		1						1						1																			6	1	0	1	7
SCNN1G	1		1		1		1										1		1				1																			6	1	0	1	7
SIX1		1		1		1				1								1	1					1																		6	1	0	1	7
SLC15A3	1		1						1		1				1		1																						1			6	0	1	1	7
SLC22A4	1				1		1		1		1								1																					1		6	0	1	1	7
SLC34A2			1		1		1		1		1						1													1												6	1	0	1	7
SLC44A4		1	1		1		1			1									1					1																		6	1	0	1	7
SLC5A6		1		1		1		1		1								1														1										6	0	1	1	7
SMG7		1				1		1		1		1						1						1																		6	1	0	1	7
SNRPD3		1				1		1		1		1								1				1																		6	1	0	1	7
SNRPF		1				1		1		1		1						1						1																		6	1	0	1	7
SPI1	1		1		1				1		1						1															1										6	0	1	1	7
STRAP				1		1		1		1		1						1											1													6	1	0	1	7
SULT4A1		1		1						1		1						1		1																		1				6	0	1	1	7
SV2A		1		1		1						1						1		1								1														6	1	0	1	7
SYNJ2		1		1		1				1						1		1										1														6	1	0	1	7
TAF1A		1		1		1				1		1						1											1													6	1	0	1	7
TDRD3	1				1		1		1		1						1						1																			6	1	0	1	7
TENM4		1				1				1		1						1		1																		1				6	0	1	1	7
THOP1		1		1		1		1		1										1				1																		6	1	0	1	7
TIMM10		1				1		1		1		1								1				1																		6	1	0	1	7
TLR4	1		1		1				1						1		1						1																			6	1	0	1	7
TMOD1	1				1				1		1		1				1											1														6	1	0	1	7
TNS4		1		1		1				1		1						1										1														6	1	0	1	7
TOMM22		1				1				1		1						1		1																		1				6	0	1	1	7
TRIM3	1				1		1		1		1								1					1																		6	1	0	1	7
TRIM31		1				1	1			1								1	1				1																			6	1	0	1	7
TRIT1		1		1		1				1		1						1						1																		6	1	0	1	7
TRMU		1		1		1				1		1		1														1														6	1	0	1	7
TSPAN9	1		1		1				1				1							1								1														6	1	0	1	7
TWNK		1				1				1		1						1		1								1														6	1	0	1	7
UBE2O		1		1		1		1		1								1						1																		6	1	0	1	7
UBL3	1				1		1		1		1						1											1														6	1	0	1	7
UBR5		1		1		1		1		1		1																											1			6	0	1	1	7
UBTD1	1		1		1				1		1						1						1																			6	1	0	1	7
UGT1A6		1				1				1		1						1		1																		1				6	0	1	1	7
VIP	1		1		1				1								1		1				1																			6	1	0	1	7
VNN3	1		1		1		1		1										1																					1		6	0	1	1	7
VSIG10	1				1				1		1						1			1																			1			6	0	1	1	7
WDR74		1		1		1		1		1		1																				1										6	0	1	1	7
WNT2	1		1						1		1		1							1													1									6	0	1	1	7
YIF1A		1				1		1		1		1						1						1																		6	1	0	1	7
ISCU	1		1		1				1		1												1					1					1			1			1	1		5	2	4	6	11
AKAP11	1			1	1				1		1												1					1					1			1			1			5	2	3	5	10
ATXN1	1		1		1			1	1																			1					1			1			1	1		5	1	4	5	10
FAM129A	1		1		1				1		1												1					1				1				1		1				5	2	3	5	10
MKL2	1			1	1		1		1																1			1					1						1	1		5	2	3	5	10
PCM1	1				1		1		1		1												1					1					1			1			1			5	2	3	5	10
RRAGA	1			1	1				1		1												1					1								1			1	1		5	2	3	5	10
RSBN1	1			1	1				1		1												1					1								1			1	1		5	2	3	5	10
SLC25A32	1			1		1		1		1														1					1			1							1		1	5	2	3	5	10
STXBP1	1			1	1				1		1												1		1			1										1		1		5	3	2	5	10
TSPAN13	1		1		1				1		1													1								1		1				1		1		5	1	4	5	10
TUBGCP5		1		1		1		1		1													1					1					1			1			1			5	2	3	5	10
TXNIP	1		1		1				1		1												1		1			1				1								1		5	3	2	5	10
BID			1			1		1		1		1												1					1			1						1				5	2	2	4	9
CASC3	1			1				1	1		1																	1					1						1	1		5	1	3	4	9
CAST	1		1		1				1		1												1					1											1	1		5	2	2	4	9
CTDSP1	1		1		1				1		1												1					1											1	1		5	2	2	4	9
DERL1		1		1		1				1		1																	1			1						1			1	5	1	3	4	9
DUSP12		1		1		1		1		1														1					1			1				1						5	2	2	4	9
DUSP3	1		1		1				1		1												1					1				1									1	5	2	2	4	9
F12		1		1		1				1		1												1					1									1			1	5	2	2	4	9
FBXO3	1			1	1				1		1												1													1			1	1		5	1	3	4	9
FBXW2	1				1			1	1		1												1					1											1	1		5	2	2	4	9
FIBP		1		1		1		1		1														1		1			1										1			5	3	1	4	9
FKBPL		1		1		1				1		1												1					1									1		1		5	2	2	4	9
FOXO1	1		1		1				1		1												1					1											1	1		5	2	2	4	9
FUBP1		1		1		1				1		1													1			1								1			1			5	2	2	4	9
GAPVD1	1		1		1				1		1												1					1											1	1		5	2	2	4	9
HSD17B11	1		1		1				1		1												1					1								1			1			5	2	2	4	9
IK	1		1		1				1		1												1					1								1				1		5	2	2	4	9
IRS2	1			1	1		1		1												1		1					1											1			5	3	1	4	9
KLF10	1				1		1		1		1												1					1				1						1				5	2	2	4	9
KPNA4	1		1			1		1				1											1						1										1		1	5	2	2	4	9
LMNA	1		1		1				1		1												1					1										1			1	5	2	2	4	9
LRRC61		1		1		1	1			1														1					1									1		1		5	2	2	4	9
LTC4S	1		1		1		1		1														1					1								1					1	5	2	2	4	9
MAP3K14	1				1		1		1		1																	1								1			1	1		5	1	3	4	9
MXRA7	1		1		1		1		1														1					1								1					1	5	2	2	4	9
NFE2L2	1		1					1	1			1											1					1											1	1		5	2	2	4	9
NISCH	1				1		1		1		1												1		1			1											1			5	3	1	4	9
PHF2	1			1	1				1		1												1					1											1	1		5	2	2	4	9
PIP4K2A	1				1			1	1		1																	1				1				1				1		5	1	3	4	9
PLA2G16	1				1		1		1		1												1					1								1		1				5	2	2	4	9
PPBP	1		1		1		1		1														1									1				1				1		5	1	3	4	9
PTPN12	1		1					1	1		1													1					1				1						1			5	2	2	4	9
RAB1A		1		1		1		1		1														1					1			1									1	5	2	2	4	9
RNF44		1		1		1		1		1														1								1							1	1		5	1	3	4	9
RPA1		1		1		1		1				1											1										1						1	1		5	1	3	4	9
SIRT1	1			1	1				1		1												1					1								1			1			5	2	2	4	9
SLK	1		1		1				1		1												1					1				1								1		5	2	2	4	9
SNTB2	1		1		1			1	1														1					1											1	1		5	2	2	4	9
TBCC		1		1		1				1		1												1					1			1							1			5	2	2	4	9
TGOLN2	1				1			1	1		1												1					1								1			1			5	2	2	4	9
TPCN1	1		1		1		1				1												1					1				1								1		5	2	2	4	9
TSPAN14	1		1		1			1	1														1					1				1								1		5	2	2	4	9
ZBTB20				1	1		1		1		1												1		1			1											1			5	3	1	4	9
ZNF544		1		1		1				1		1												1									1						1	1		5	1	3	4	9
ABCA1	1		1			1		1	1														1					1											1			5	2	1	3	8
ABI2	1			1	1					1		1												1					1									1				5	2	1	3	8
ACP1		1		1		1		1		1														1					1			1										5	2	1	3	8
ADA			1			1		1		1		1																	1									1			1	5	1	2	3	8
ADH1C	1		1		1		1		1														1		1			1														5	3	0	3	8
AGK		1		1		1				1		1												1								1						1				5	1	2	3	8
ANKRD6	1			1	1				1		1												1					1								1						5	2	1	3	8
APH1A		1	1			1		1		1														1										1							1	5	1	2	3	8
ARHGAP17	1		1		1				1		1												1					1											1			5	2	1	3	8
ARMC1		1		1		1		1		1																			1										1	1		5	1	2	3	8
ASCC3		1		1		1		1		1														1					1							1						5	2	1	3	8
ATP2B4	1		1		1				1		1												1										1						1			5	1	2	3	8
BACE1		1		1				1	1		1												1					1													1	5	2	1	3	8
BAZ2B	1			1	1		1		1														1					1									1					5	2	1	3	8
BTG2	1				1		1		1		1																	1											1	1		5	1	2	3	8
BUB3		1		1		1		1		1														1												1			1			5	1	2	3	8
CALCOCO2	1		1		1				1		1																	1				1									1	5	1	2	3	8
CAPZA1		1		1		1		1		1														1					1										1			5	2	1	3	8
CCDC47		1		1		1		1		1														1				1											1			5	2	1	3	8
CDC123		1		1		1		1		1														1					1										1			5	2	1	3	8
CFP	1				1		1		1		1												1									1						1				5	1	2	3	8
CRK	1		1		1				1		1												1					1												1		5	2	1	3	8
CSNK1D			1			1		1	1		1																	1				1							1			5	1	2	3	8
CTPS2		1		1		1				1		1												1					1				1									5	2	1	3	8
CTSF	1			1	1				1		1												1					1											1			5	2	1	3	8
CUL4B		1		1		1		1		1																							1						1	1		5	0	3	3	8
CX3CL1	1		1		1		1		1												1							1		1												5	3	0	3	8
DDX1				1		1		1		1		1																					1			1			1			5	0	3	3	8
DNAJC9		1		1				1		1		1												1					1										1			5	2	1	3	8
DPYSL3	1			1	1			1	1														1					1										1				5	2	1	3	8
ELAVL1		1		1		1				1		1												1					1										1			5	2	1	3	8
EPCAM		1				1				1				1				1						1					1											1		5	2	1	3	8
FADD		1				1		1		1		1												1												1			1			5	1	2	3	8
FASTKD3		1		1		1		1		1														1															1	1		5	1	2	3	8
FBXW4	1		1		1			1	1														1					1											1			5	2	1	3	8
FRYL	1		1		1				1		1												1										1						1			5	1	2	3	8
GDF10	1				1		1		1		1												1		1			1														5	3	0	3	8
HDAC5	1			1	1				1		1												1					1											1			5	2	1	3	8
HDHD3		1		1		1				1		1																1											1	1		5	1	2	3	8
HIST1H2BH		1		1		1				1		1												1					1												1	5	2	1	3	8
HIST3H2A		1		1		1				1		1												1														1		1		5	1	2	3	8
HMG20A	1			1				1	1		1																						1						1	1		5	0	3	3	8
HPSE		1		1		1				1		1												1		1			1													5	3	0	3	8
HSPA4		1		1		1		1		1																			1							1			1			5	1	2	3	8
HUS1		1				1		1		1		1												1					1							1						5	2	1	3	8
IFI30	1		1					1	1		1													1					1			1										5	2	1	3	8
ISG20	1		1			1	1			1														1								1								1		5	1	2	3	8
ITSN2	1				1			1	1		1												1													1			1			5	1	2	3	8
KIF2A		1		1		1				1		1												1					1											1		5	2	1	3	8
KLC1	1			1	1				1		1												1					1											1			5	2	1	3	8
LRRC8D		1		1		1		1		1														1									1						1			5	1	2	3	8
LSM7		1				1		1		1		1												1								1							1			5	1	2	3	8
MBNL1	1		1		1			1	1												1		1																1			5	2	1	3	8
MCL1	1		1		1				1		1														1			1								1						5	2	1	3	8
MPHOSPH9		1		1		1		1		1														1					1										1			5	2	1	3	8
MTMR4		1		1		1		1		1														1															1	1		5	1	2	3	8
NAAA	1				1		1		1		1																	1				1						1				5	1	2	3	8
NCBP1		1		1		1		1		1														1					1										1			5	2	1	3	8
NCOA4	1		1		1				1		1												1					1				1										5	2	1	3	8
NCSTN		1		1		1		1		1														1								1									1	5	1	2	3	8
NUCB2		1		1	1		1			1																		1				1						1				5	1	2	3	8
OVOL2		1		1		1	1			1														1				1										1				5	2	1	3	8
PANK3				1	1			1	1		1													1				1											1			5	2	1	3	8
PARN		1		1		1		1		1														1									1						1			5	1	2	3	8
PAXIP1		1		1		1		1		1														1															1	1		5	1	2	3	8
PCSK5	1		1		1		1		1														1					1												1		5	2	1	3	8
PHF11	1		1		1				1		1																	1								1			1			5	1	2	3	8
PHTF2		1		1		1		1		1														1					1										1			5	2	1	3	8
PLA2G7		1	1			1		1		1														1					1											1		5	2	1	3	8
POLR2K		1		1		1		1		1														1					1										1			5	2	1	3	8
POMGNT1		1		1		1	1			1																		1					1				1					5	1	2	3	8
PPP3CB	1			1	1				1		1												1					1				1										5	2	1	3	8
PRKACB	1				1			1	1		1																	1				1						1				5	1	2	3	8
PROM1		1		1	1		1			1											1							1											1			5	2	1	3	8
PRR5		1	1			1				1		1																1										1		1		5	1	2	3	8
PSMA4		1	1			1		1		1														1					1										1			5	2	1	3	8
PSMD12		1				1		1		1		1												1					1			1										5	2	1	3	8
RAB22A		1		1		1		1		1													1						1										1			5	2	1	3	8
RAB5B	1				1			1	1		1												1					1											1			5	2	1	3	8
RABIF		1		1		1				1		1												1					1			1										5	2	1	3	8
RASA1		1		1	1		1				1																	1											1	1		5	1	2	3	8
RBBP7		1		1		1		1		1														1												1			1			5	1	2	3	8
REM1	1		1		1		1		1														1		1													1				5	2	1	3	8
RGS16	1		1		1				1		1													1					1									1				5	2	1	3	8
RIPK2	1		1			1		1		1														1					1			1										5	2	1	3	8
RNF146	1			1	1				1		1												1										1							1		5	1	2	3	8
RPAP3		1		1		1		1		1														1					1											1		5	2	1	3	8
RPS6KA5	1			1	1		1		1																			1				1								1		5	1	2	3	8
SCARA3	1		1		1		1		1														1					1										1				5	2	1	3	8
SLC24A1	1				1		1		1		1												1					1										1				5	2	1	3	8
SP3		1		1		1		1		1																			1										1	1		5	1	2	3	8
TCF20		1				1		1		1		1																								1			1	1		5	0	3	3	8
TCF7L2	1		1		1				1		1												1					1				1										5	2	1	3	8
TFE3	1		1		1				1		1												1					1											1			5	2	1	3	8
TFPI	1		1		1				1		1												1		1			1														5	3	0	3	8
TIPRL		1		1		1		1		1																			1				1						1			5	1	2	3	8
TMBIM1	1		1					1	1		1												1					1				1										5	2	1	3	8
TMEM43	1		1					1	1		1												1					1											1			5	2	1	3	8
TOB1				1	1		1		1		1													1				1				1										5	2	1	3	8
TRPC1	1			1	1		1		1														1					1								1						5	2	1	3	8
TRRAP		1		1		1		1		1														1															1	1		5	1	2	3	8
UBE2K		1				1		1		1		1												1					1										1			5	2	1	3	8
USP21		1		1		1				1		1												1															1	1		5	1	2	3	8
YWHAQ				1		1		1		1		1																	1							1			1			5	1	2	3	8
ZNHIT3		1		1		1		1		1																										1			1	1		5	0	3	3	8
ABCF1		1				1		1		1		1												1					1													5	2	0	2	7
ABHD14A		1			1		1		1		1												1					1														5	2	0	2	7
ACOX2		1			1		1		1		1												1															1				5	1	1	2	7
AKAP1		1		1		1		1		1													1									1										5	1	1	2	7
ALCAM	1				1		1		1		1													1				1														5	2	0	2	7
ALG6		1		1		1		1		1														1					1													5	2	0	2	7
APOO		1		1		1				1		1												1					1													5	2	0	2	7
AUP1		1				1		1		1		1												1																	1	5	1	1	2	7
AVPI1	1		1		1		1		1														1					1														5	2	0	2	7
BMP4		1	1		1		1		1														1					1														5	2	0	2	7
C3	1		1		1				1		1												1					1														5	2	0	2	7
CALD1	1		1		1				1		1												1					1														5	2	0	2	7
CBLB		1	1			1				1		1																											1	1		5	0	2	2	7
CBX6	1			1	1			1	1														1					1														5	2	0	2	7
CCL23	1		1		1		1		1														1																		1	5	1	1	2	7
CCT2		1		1		1		1		1														1					1													5	2	0	2	7
CEBPG				1		1		1		1		1																	1												1	5	1	1	2	7
CEP350		1		1		1		1		1																			1										1			5	1	1	2	7
CFH	1		1		1		1		1														1					1														5	2	0	2	7
CHD4		1		1		1		1		1														1															1			5	1	1	2	7
CLASP2	1			1	1				1		1																												1		1	5	0	2	2	7
COG2		1		1		1		1		1														1																1		5	1	1	2	7
COQ3		1		1		1				1		1											1															1				5	1	1	2	7
COX5B		1				1		1		1		1											1																1			5	1	1	2	7
CPSF4		1		1		1		1		1													1		1																	5	2	0	2	7
CRIP1	1		1				1		1		1																												1		1	5	0	2	2	7
CSNK2A1		1		1		1				1		1												1					1													5	2	0	2	7
CST5	1		1		1		1		1														1															1				5	1	1	2	7
CSTF1		1				1		1		1		1												1					1													5	2	0	2	7
CTSB		1	1			1		1		1														1								1										5	1	1	2	7
DAZAP2	1		1		1				1		1																	1											1			5	1	1	2	7
DDAH2	1		1		1				1		1												1					1														5	2	0	2	7
DDR2	1		1		1				1		1												1					1														5	2	0	2	7
DHRS7B			1		1		1		1		1												1					1														5	2	0	2	7
DHX8		1		1		1		1		1														1												1						5	1	1	2	7
DHX9		1		1		1		1		1														1															1			5	1	1	2	7
DIABLO		1		1				1		1		1												1															1			5	1	1	2	7
DSTN	1		1		1				1		1																	1				1										5	1	1	2	7
DYNC2H1	1			1	1				1		1												1					1														5	2	0	2	7
DYRK2		1		1		1				1		1																	1							1						5	1	1	2	7
E2F6		1		1				1		1		1												1					1													5	2	0	2	7
EHBP1	1			1		1		1	1														1																1			5	1	1	2	7
EI24		1		1		1		1		1																		1										1				5	1	1	2	7
EIF3D		1				1		1		1		1											1					1														5	2	0	2	7
EIF4E2		1	1			1				1		1																	1							1						5	1	1	2	7
ELOVL6		1		1		1		1		1																			1											1		5	1	1	2	7
ENOPH1		1		1		1		1		1														1					1													5	2	0	2	7
EXOSC7		1	1			1		1		1																		1				1										5	1	1	2	7
FADS3	1		1		1				1		1												1									1										5	1	1	2	7
FARP2		1		1		1			1		1																	1											1			5	1	1	2	7
FASTKD1		1		1		1		1		1																			1										1			5	1	1	2	7
FGD6		1	1			1		1		1														1					1													5	2	0	2	7
FHL3		1	1			1				1		1																1										1				5	1	1	2	7
FSTL3	1		1		1				1		1												1															1				5	1	1	2	7
GLMN		1		1		1		1		1																			1							1						5	1	1	2	7
GNPAT		1		1		1		1		1																			1										1			5	1	1	2	7
GORASP1	1		1		1				1		1																	1											1			5	1	1	2	7
GTF2E1		1				1		1		1		1												1																1		5	1	1	2	7
GTF3C2		1		1		1		1		1														1															1			5	1	1	2	7
GTPBP2		1		1		1		1		1																			1										1			5	1	1	2	7
GTPBP3		1		1		1				1		1																	1									1				5	1	1	2	7
HIST1H3H		1				1		1		1		1												1					1													5	2	0	2	7
HS2ST1		1		1		1		1		1																			1										1			5	1	1	2	7
HTATIP2		1	1			1		1		1														1					1													5	2	0	2	7
ILK	1		1		1				1		1																	1											1			5	1	1	2	7
IPO9		1				1		1		1		1												1															1			5	1	1	2	7
ITCH		1				1		1		1		1												1					1													5	2	0	2	7
KCNJ8	1		1		1				1		1												1					1														5	2	0	2	7
KIAA0232	1			1	1				1		1																	1											1			5	1	1	2	7
KREMEN2		1		1		1	1			1														1														1				5	1	1	2	7
LCMT1		1		1		1		1		1														1															1			5	1	1	2	7
LRRC8E		1	1			1				1		1												1																	1	5	1	1	2	7
LYL1	1		1		1				1		1												1									1										5	1	1	2	7
MAN2B1		1	1					1	1		1																					1									1	5	0	2	2	7
MANBA		1	1					1	1		1																	1				1										5	1	1	2	7
MAP3K7		1		1		1		1		1													1																1			5	1	1	2	7
MAPK1	1		1		1			1		1														1																1		5	1	1	2	7
MED8		1				1		1		1		1																					1							1		5	0	2	2	7
MEX3C	1			1		1		1		1																							1						1			5	0	2	2	7
MRPL12		1		1				1		1		1												1					1													5	2	0	2	7
MRPL35		1		1		1				1		1																	1							1						5	1	1	2	7
MTCH2		1		1		1				1		1												1					1													5	2	0	2	7
MTMR1		1				1		1		1		1																											1	1		5	0	2	2	7
NAP1L4		1		1		1		1		1																													1	1		5	0	2	2	7
NDUFA4L2	1					1		1	1			1											1																	1		5	1	1	2	7
NDUFAF3	1				1		1		1		1																	1											1			5	1	1	2	7
NKIRAS2		1		1		1		1		1																						1									1	5	0	2	2	7
NNT		1		1		1		1		1																			1												1	5	1	1	2	7
NRBP1		1				1		1		1		1														1										1						5	1	1	2	7
NRP1	1		1		1				1		1												1					1														5	2	0	2	7
NTAN1	1		1					1	1		1												1									1										5	1	1	2	7
NUDT21				1		1		1		1		1												1		1																5	2	0	2	7
NUP133		1		1		1		1		1																													1	1		5	0	2	2	7
OAS3		1	1			1		1		1														1					1													5	2	0	2	7
OLFML3	1		1		1				1		1												1					1														5	2	0	2	7
PARVA	1		1		1		1		1														1					1														5	2	0	2	7
PDGFRA	1		1			1			1		1												1					1														5	2	0	2	7
PDS5A		1		1		1		1		1																							1						1			5	0	2	2	7
PDZRN3	1			1	1				1		1												1					1														5	2	0	2	7
PEA15	1		1		1			1	1																			1				1										5	1	1	2	7
PLVAP		1			1		1			1		1											1					1														5	2	0	2	7
PNKP		1		1		1				1		1																1				1										5	1	1	2	7
POLI	1			1	1		1		1																			1											1			5	1	1	2	7
POP7		1		1		1				1		1												1																1		5	1	1	2	7
PSMB2		1				1		1		1		1												1					1													5	2	0	2	7
PTP4A3		1		1		1				1		1												1														1				5	1	1	2	7
RALY		1	1			1		1		1														1								1										5	1	1	2	7
RBMX2		1		1		1		1		1													1																1			5	1	1	2	7
RNF126	1			1		1				1		1																											1		1	5	0	2	2	7
RPL22		1	1		1			1		1													1					1														5	2	0	2	7
RPN1		1				1		1		1		1												1								1										5	1	1	2	7
RRN3		1		1		1	1			1																										1			1			5	0	2	2	7
RSL1D1		1	1			1		1		1																		1				1										5	1	1	2	7
SAMD4A	1		1		1				1		1												1					1														5	2	0	2	7
SAP130		1		1		1		1		1																													1	1		5	0	2	2	7
SCYL2		1				1		1		1		1												1					1													5	2	0	2	7
SDCCAG3		1		1		1		1		1																							1						1			5	0	2	2	7
SDF2		1		1		1		1		1														1																1		5	1	1	2	7
SLC25A15		1		1		1		1		1																												1		1		5	0	2	2	7
SLC25A4	1			1	1		1		1																			1												1		5	1	1	2	7
SLC39A1		1	1			1		1		1																1															1	5	1	1	2	7
SLC6A14	1		1				1		1		1										1																		1			5	1	1	2	7
SMARCA4		1		1		1		1		1														1								1										5	1	1	2	7
SMC6		1		1		1		1		1														1					1													5	2	0	2	7
SNAP23	1		1		1				1		1																					1							1			5	0	2	2	7
SND1		1		1		1		1		1																						1						1				5	0	2	2	7
SNX24	1		1		1				1		1																												1		1	5	0	2	2	7
SRP72		1		1		1		1		1														1																	1	5	1	1	2	7
SSR2		1	1			1		1		1														1								1										5	1	1	2	7
STAMBP		1				1		1		1		1												1															1			5	1	1	2	7
SUCLG2		1	1		1					1	1												1					1														5	2	0	2	7
SUMO2		1		1		1		1		1																			1										1			5	1	1	2	7
SUMO3		1				1		1		1		1																	1			1										5	1	1	2	7
SUZ12		1		1		1		1		1																			1										1			5	1	1	2	7
SVIL	1		1		1			1	1														1					1														5	2	0	2	7
SWAP70	1		1		1				1		1												1																1			5	1	1	2	7
SYT11	1			1	1				1		1																									1			1			5	0	2	2	7
SYTL2		1	1		1		1			1														1												1						5	1	1	2	7
TAF4		1		1		1		1		1														1																1		5	1	1	2	7
TBP	1			1		1		1	1																			1												1		5	1	1	2	7
TGFBI		1	1			1		1		1																													1	1		5	0	2	2	7
TMCC1	1			1				1	1			1											1																	1		5	1	1	2	7
TPT1	1		1		1				1		1												1					1														5	2	0	2	7
TRIM24		1		1		1		1		1														1					1													5	2	0	2	7
TSC22D1	1				1		1		1		1																	1											1			5	1	1	2	7
TSEN34		1		1		1				1		1												1															1			5	1	1	2	7
TSN		1		1		1		1		1																							1						1			5	0	2	2	7
TTC13		1		1		1		1		1														1					1													5	2	0	2	7
TWISTNB		1		1		1		1		1																													1		1	5	0	2	2	7
TXLNA		1		1		1		1		1																							1						1			5	0	2	2	7
TXN		1	1			1				1		1												1					1													5	2	0	2	7
UBAP2L		1				1		1		1		1												1								1										5	1	1	2	7
UBE2Z		1		1		1		1		1														1															1			5	1	1	2	7
USP3		1	1			1		1		1														1								1										5	1	1	2	7
UTP14C	1			1	1				1		1												1																	1		5	1	1	2	7
UTP18		1		1		1		1		1														1															1			5	1	1	2	7
YTHDF1		1		1		1		1		1														1															1			5	1	1	2	7
ZNF593		1	1			1				1		1												1													1					5	1	1	2	7
AAAS		1		1		1				1		1																1														5	1	0	1	6
AAMP		1		1		1		1		1																														1		5	0	1	1	6
ACLY		1		1		1		1		1																													1			5	0	1	1	6
ACSBG1	1			1	1		1		1														1																			5	1	0	1	6
AES	1			1	1				1		1																	1														5	1	0	1	6
ANKRD40	1		1		1			1		1																			1													5	1	0	1	6
AP3D1		1		1		1		1		1																		1														5	1	0	1	6
AP3S2		1		1	1			1		1																														1		5	0	1	1	6
APOL1	1		1			1		1	1																															1		5	0	1	1	6
ATAD3A		1		1		1				1		1												1																		5	1	0	1	6
ATP9B	1			1	1				1		1																	1														5	1	0	1	6
ATRN		1		1		1		1		1																		1														5	1	0	1	6
BCL7A		1		1		1				1		1																									1					5	0	1	1	6
BOLA1		1		1		1				1		1												1																		5	1	0	1	6
CAPRIN1		1		1		1		1		1																			1													5	1	0	1	6
CARHSP1			1			1		1		1		1																										1				5	0	1	1	6
CCDC6		1	1			1		1		1																															1	5	0	1	1	6
CEBPB	1		1		1				1		1																					1										5	0	1	1	6
COQ6		1		1		1	1			1																		1														5	1	0	1	6
CRY1	1			1	1				1		1													1																		5	1	0	1	6
CSPP1	1		1		1		1		1																																1	5	0	1	1	6
CST6	1		1				1		1		1													1																		5	1	0	1	6
CSTF3		1		1		1		1		1														1																		5	1	0	1	6
DR1				1		1		1		1		1																	1													5	1	0	1	6
DRG1		1				1		1		1		1											1																			5	1	0	1	6
EMG1		1	1					1		1		1																												1		5	0	1	1	6
FAM20B	1			1		1		1	1																				1													5	1	0	1	6
FBXL6		1		1		1				1		1												1																		5	1	0	1	6
FBXO46		1		1		1				1		1												1																		5	1	0	1	6
FCHSD2	1		1		1				1		1																									1						5	0	1	1	6
FH		1		1		1		1		1																			1													5	1	0	1	6
GDI2		1	1			1		1		1																							1									5	0	1	1	6
GOT1		1		1		1				1		1												1																		5	1	0	1	6
GTF3C3				1		1		1		1		1																											1			5	0	1	1	6
HAGH				1	1		1		1		1																													1		5	0	1	1	6
HEATR6		1		1		1		1		1																													1			5	0	1	1	6
HSPA9		1		1		1		1		1														1																		5	1	0	1	6
[truncated: 7,624 more rows]

## Sheet: LC&LK&BC
GENES	LC	BC	LK	OC	TOTAL		LC&LK			LC&BC			LC&LK&BC
SYNM	8	5	1	6	14		IFT57	DPEP2	ENO1	CNN1	COL10A1	ID4	SYNM	MMP11	SDC1
ZBTB16	9	4	3	7	16		SLC1A1	CYC1	ENPP4	FABP4	COL11A1	LRRC15	ZBTB16	PCNA	C1orf115
ACTG2	9	4	1	5	14		ITGA8	GPI	FUT3	FAM107A	SULF1	CAV2	ACTG2	BIRC5	TCEAL2
ITM2A	9	4	1	5	14		IL18RAP	MCM7	RAB38	SOX17	MAD2L1	CYP4B1	ITM2A	MCM4	GPRASP1
KLF4	9	4	1	5	14		CD33	RRM1		ADH1B	COL5A2	E2F8	KLF4	ASF1B	HSPB6
CAV1	8	4	1	5	13		FGR	SLC6A8		EMCN	UCK2	FEZ1	CAV1	CKAP4	LAMP3
COL10A1	9	4	0	4	13		PLAC8	SPRR1A		ITIH5	UBE2C	ITGB4	CFD	EIF2AK1	RTN1
COL11A1	8	4	0	4	12		SAMHD1	SPTBN2		LDB2	BUB1B	PLAU	DUSP1	MCM2	LAD1
SULF1	8	4	0	4	12		FGL2	SSR4		MMRN1	CCNB1	TMC5	TAL1	NME4	COX6B1
CFD	8	3	3	6	14		NR4A3	THY1		AOC3	CCNE1	LDB3	CXCL12	PDIA6	MDH2
DUSP1	9	3	2	5	14		SLC14A1			ARHGAP6	CCT3	SERPINH1	GNG11	PRC1	NPR3
TAL1	9	3	2	5	14					EPAS1	CEP55	SHC1	PTGER4	TIMELESS
CXCL12	8	3	2	5	13					KLF2	CHEK1	TTLL7	SELENBP1	DEPDC1
GNG11	8	3	2	5	13					LTBP4	KIF11		ACACB	EXO1
PTGER4	8	3	2	5	13					PALMD	KIF14		FHL1	CCNA2
SELENBP1	8	3	2	5	13					PDE2A	KIF20A		FZD4	CCNB2
ACACB	10	3	1	4	14					SPARCL1	KIF4A		LYVE1	CDC20
FHL1	10	3	1	4	14					SRPX	MMP1		AOX1	CDCA3
FZD4	9	3	1	4	13					ABCA8	NCAPG		CD36	CDCA8
LYVE1	9	3	1	4	13					ACADL	NEK2		HLF	FOXM1
MMP11	9	3	1	4	13					ASPA	PAICS		IL33	HMMR
SDC1	9	3	1	4	13					CAB39L	TOP2A		MMRN2	MELK
AOX1	8	3	1	4	12					FHL5	TPX2		PIK3R1	PBK
C1orf115	8	3	1	4	12					PDK4	TROAP		TNXB	PLK1
CD36	8	3	1	4	12					AGTR1	ZWINT		VIPR1	RRM2
HLF	8	3	1	4	12					ANGPT1	ASPM		CORO2B	SLC7A5
IL33	8	3	1	4	12					FBLN5	AURKB		HBB	ACTL6A
MMRN2	8	3	1	4	12					GPX3	BUB1		F8	AURKA
PCNA	8	3	1	4	12					MFAP4	CDKN3		ADRB2	CDCA4
PIK3R1	8	3	1	4	12					TMEM47	CENPA		GIMAP6	CENPF
TNXB	8	3	1	4	12					ACVRL1	CENPE		GYPC	CIT
VIPR1	8	3	1	4	12					CA4	CENPM		LMO2	ERCC6L
CNN1	10	3	0	3	13					CDH5	DLGAP5		SELP	ESPL1
FABP4	10	3	0	3	13					CDO1	DTL		JAM2	HJURP
FAM107A	10	3	0	3	13					CYB5A	FANCI		SLIT3	HPRT1
SOX17	10	3	0	3	13					DENND2A	FEN1		CHRDL1	KIF15
ADH1B	9	3	0	3	12					FAM184A	GINS1		ENG	KIF2C
EMCN	9	3	0	3	12					FOLR1	GINS2		FMO2	KIFC1
ITIH5	9	3	0	3	12					GIPC2	KIF23		MNDA	LAPTM4B
LDB2	9	3	0	3	12					GPD1	LMNB1		MYH10	LRP8
MAD2L1	9	3	0	3	12					LEPR	LMNB2		PDZD2	MCM6
MMRN1	9	3	0	3	12					LIMS2	MCM10		RAI2	MKI67
AOC3	8	3	0	3	11					LMOD1	MCM3		RAMP3	NDC80
ARHGAP6	8	3	0	3	11					MEIS1	MTHFD2		ROBO4	PLOD2
COL5A2	8	3	0	3	11					MGP	MYBL2		S1PR1	RFC2
EPAS1	8	3	0	3	11					MYL9	NUSAP1		STARD8	SPP1
ID4	8	3	0	3	11					NR2F1	OIP5		VWF	SRPK1
KLF2	8	3	0	3	11					PCOLCE2	PSMD2		CLDN18	STMN1
LRRC15	8	3	0	3	11					PODXL	PTTG1		GPM6A	TK1
LTBP4	8	3	0	3	11					RASIP1	RACGAP1		PRX	TMEM132A
PALMD	8	3	0	3	11					RBMS3	RAD51AP1		PIP5K1B	TYMS
PDE2A	8	3	0	3	11					RGN	RCC1		GPD1L	ENO2
SPARCL1	8	3	0	3	11					SLC19A3	RFC4		PLCE1	SMARCB1
SRPX	8	3	0	3	11					STARD13	RFWD3		SEMA5A	SOX4
UCK2	8	3	0	3	11					TMEM100	RNASEH2A		DNAI1	PPAT
CORO2B	9	2	3	5	14					WISP2	SPAG5		MYCT1	CAD
HBB	9	2	3	5	14					ADAMTS8	TTK		PKNOX2	MARCKSL1
BIRC5	10	2	2	4	14					ADAMTSL3	WDR12		PLLP	NETO2
F8	9	2	2	4	13					CLIC5	ZWILCH		SLC15A2	RSRC1
MCM4	9	2	2	4	13					SCGB1A1	PSAT1			SHMT2
TCEAL2	9	2	2	4	13					ADRB1	RAD54L			SKP2
ADRB2	8	2	2	4	12					AQP4	ABCA12			SLC12A8
ASF1B	8	2	2	4	12					CA2	CA9			SRM
CKAP4	8	2	2	4	12					CASQ2	CCNF			BZW2
EIF2AK1	8	2	2	4	12					CLEC1A	CDC6			ALDH18A1
GIMAP6	8	2	2	4	12					CPA3	CHAF1A			APEX1
GPRASP1	8	2	2	4	12					EFCAB1	DLX5			EIF4EBP1
GYPC	8	2	2	4	12					HIGD1B	FKBP4			GINS3
LMO2	8	2	2	4	12					KCNA5	GMNN			GPX2
MCM2	8	2	2	4	12					PDE8B	GORASP2			LSR
NME4	8	2	2	4	12					PZP	NIPSNAP1			MMP14
PDIA6	8	2	2	4	12					RAB11FIP1	RANGAP1			PRAME
PRC1	8	2	2	4	12					SGCG	TMEM158			PRPF19
SELP	8	2	2	4	12					SLPI	TUBG1			SPINT2
TIMELESS	8	2	2	4	12					TBX4				TFAP2C
DEPDC1	10	2	1	3	13					TCF21				TMEM106C
EXO1	10	2	1	3	13					TPPP3				UCHL1
CCNA2	9	2	1	3	12					TRHDE				UNG
CCNB2	9	2	1	3	12					TRPC6
CDC20	9	2	1	3	12
CDCA3	9	2	1	3	12
CDCA8	9	2	1	3	12
FOXM1	9	2	1	3	12
HMMR	9	2	1	3	12
JAM2	9	2	1	3	12
MELK	9	2	1	3	12
PBK	9	2	1	3	12
PLK1	9	2	1	3	12
RRM2	9	2	1	3	12
SLC7A5	9	2	1	3	12
SLIT3	9	2	1	3	12
ACTL6A	8	2	1	3	11
AURKA	8	2	1	3	11
CDCA4	8	2	1	3	11
CENPF	8	2	1	3	11
CHRDL1	8	2	1	3	11
CIT	8	2	1	3	11
ENG	8	2	1	3	11
ERCC6L	8	2	1	3	11
ESPL1	8	2	1	3	11
FMO2	8	2	1	3	11
HJURP	8	2	1	3	11
HPRT1	8	2	1	3	11
HSPB6	8	2	1	3	11
KIF15	8	2	1	3	11
KIF2C	8	2	1	3	11
KIFC1	8	2	1	3	11
LAMP3	8	2	1	3	11
LAPTM4B	8	2	1	3	11
LRP8	8	2	1	3	11
MCM6	8	2	1	3	11
MKI67	8	2	1	3	11
MNDA	8	2	1	3	11
MYH10	8	2	1	3	11
NDC80	8	2	1	3	11
PDZD2	8	2	1	3	11
PLOD2	8	2	1	3	11
RAI2	8	2	1	3	11
RAMP3	8	2	1	3	11
RFC2	8	2	1	3	11
ROBO4	8	2	1	3	11
RTN1	8	2	1	3	11
S1PR1	8	2	1	3	11
SPP1	8	2	1	3	11
SRPK1	8	2	1	3	11
STARD8	8	2	1	3	11
STMN1	8	2	1	3	11
TK1	8	2	1	3	11
TMEM132A	8	2	1	3	11
TYMS	8	2	1	3	11
VWF	8	2	1	3	11
ABCA8	10	2	0	2	12
ACADL	10	2	0	2	12
ASPA	10	2	0	2	12
CAB39L	10	2	0	2	12
FHL5	10	2	0	2	12
PDK4	10	2	0	2	12
UBE2C	10	2	0	2	12
AGTR1	9	2	0	2	11
ANGPT1	9	2	0	2	11
BUB1B	9	2	0	2	11
CAV2	9	2	0	2	11
CCNB1	9	2	0	2	11
CCNE1	9	2	0	2	11
CCT3	9	2	0	2	11
CEP55	9	2	0	2	11
CHEK1	9	2	0	2	11
CYP4B1	9	2	0	2	11
FBLN5	9	2	0	2	11
GPX3	9	2	0	2	11
KIF11	9	2	0	2	11
KIF14	9	2	0	2	11
KIF20A	9	2	0	2	11
KIF4A	9	2	0	2	11
MFAP4	9	2	0	2	11
MMP1	9	2	0	2	11
NCAPG	9	2	0	2	11
NEK2	9	2	0	2	11
PAICS	9	2	0	2	11
TMEM47	9	2	0	2	11
TOP2A	9	2	0	2	11
TPX2	9	2	0	2	11
TROAP	9	2	0	2	11
ZWINT	9	2	0	2	11
ACVRL1	8	2	0	2	10
ASPM	8	2	0	2	10
AURKB	8	2	0	2	10
BUB1	8	2	0	2	10
CA4	8	2	0	2	10
CDH5	8	2	0	2	10
CDKN3	8	2	0	2	10
CDO1	8	2	0	2	10
CENPA	8	2	0	2	10
CENPE	8	2	0	2	10
CENPM	8	2	0	2	10
CYB5A	8	2	0	2	10
DENND2A	8	2	0	2	10
DLGAP5	8	2	0	2	10
DTL	8	2	0	2	10
E2F8	8	2	0	2	10
FAM184A	8	2	0	2	10
FANCI	8	2	0	2	10
FEN1	8	2	0	2	10
FEZ1	8	2	0	2	10
FOLR1	8	2	0	2	10
GINS1	8	2	0	2	10
GINS2	8	2	0	2	10
GIPC2	8	2	0	2	10
GPD1	8	2	0	2	10
ITGB4	8	2	0	2	10
KIF23	8	2	0	2	10
LEPR	8	2	0	2	10
LIMS2	8	2	0	2	10
LMNB1	8	2	0	2	10
LMNB2	8	2	0	2	10
LMOD1	8	2	0	2	10
MCM10	8	2	0	2	10
MCM3	8	2	0	2	10
MEIS1	8	2	0	2	10
MGP	8	2	0	2	10
MTHFD2	8	2	0	2	10
MYBL2	8	2	0	2	10
MYL9	8	2	0	2	10
NR2F1	8	2	0	2	10
NUSAP1	8	2	0	2	10
OIP5	8	2	0	2	10
PCOLCE2	8	2	0	2	10
PLAU	8	2	0	2	10
PODXL	8	2	0	2	10
PSMD2	8	2	0	2	10
PTTG1	8	2	0	2	10
RACGAP1	8	2	0	2	10
RAD51AP1	8	2	0	2	10
RASIP1	8	2	0	2	10
RBMS3	8	2	0	2	10
RCC1	8	2	0	2	10
RFC4	8	2	0	2	10
RFWD3	8	2	0	2	10
RGN	8	2	0	2	10
RNASEH2A	8	2	0	2	10
SLC19A3	8	2	0	2	10
SPAG5	8	2	0	2	10
STARD13	8	2	0	2	10
TMC5	8	2	0	2	10
TMEM100	8	2	0	2	10
TTK	8	2	0	2	10
WDR12	8	2	0	2	10
WISP2	8	2	0	2	10
ZWILCH	8	2	0	2	10
ENO2	8	1	4	5	13
SMARCB1	8	1	3	4	12
SOX4	10	1	2	3	13
CLDN18	9	1	2	3	12
PPAT	9	1	2	3	12
CAD	8	1	2	3	11
GPM6A	8	1	2	3	11
MARCKSL1	8	1	2	3	11
NETO2	8	1	2	3	11
PRX	8	1	2	3	11
RSRC1	8	1	2	3	11
SHMT2	8	1	2	3	11
SKP2	8	1	2	3	11
SLC12A8	8	1	2	3	11
SRM	8	1	2	3	11
LAD1	10	1	1	2	12
PIP5K1B	10	1	1	2	12
BZW2	9	1	1	2	11
GPD1L	9	1	1	2	11
PLCE1	9	1	1	2	11
SEMA5A	9	1	1	2	11
ALDH18A1	8	1	1	2	10
APEX1	8	1	1	2	10
COX6B1	8	1	1	2	10
DNAI1	8	1	1	2	10
EIF4EBP1	8	1	1	2	10
GINS3	8	1	1	2	10
GPX2	8	1	1	2	10
LSR	8	1	1	2	10
MDH2	8	1	1	2	10
MMP14	8	1	1	2	10
MYCT1	8	1	1	2	10
NPR3	8	1	1	2	10
PKNOX2	8	1	1	2	10
PLLP	8	1	1	2	10
PRAME	8	1	1	2	10
PRPF19	8	1	1	2	10
SLC15A2	8	1	1	2	10
SPINT2	8	1	1	2	10
TFAP2C	8	1	1	2	10
TMEM106C	8	1	1	2	10
UCHL1	8	1	1	2	10
UNG	8	1	1	2	10
ADAMTS8	10	1	0	1	11
ADAMTSL3	9	1	0	1	10
CLIC5	9	1	0	1	10
PSAT1	9	1	0	1	10
RAD54L	9	1	0	1	10
SCGB1A1	9	1	0	1	10
ABCA12	8	1	0	1	9
ADRB1	8	1	0	1	9
AQP4	8	1	0	1	9
CA2	8	1	0	1	9
CA9	8	1	0	1	9
CASQ2	8	1	0	1	9
CCNF	8	1	0	1	9
CDC6	8	1	0	1	9
CHAF1A	8	1	0	1	9
CLEC1A	8	1	0	1	9
CPA3	8	1	0	1	9
DLX5	8	1	0	1	9
EFCAB1	8	1	0	1	9
FKBP4	8	1	0	1	9
GMNN	8	1	0	1	9
GORASP2	8	1	0	1	9
HIGD1B	8	1	0	1	9
KCNA5	8	1	0	1	9
LDB3	8	1	0	1	9
NIPSNAP1	8	1	0	1	9
PDE8B	8	1	0	1	9
PZP	8	1	0	1	9
RAB11FIP1	8	1	0	1	9
RANGAP1	8	1	0	1	9
SERPINH1	8	1	0	1	9
SGCG	8	1	0	1	9
SHC1	8	1	0	1	9
SLPI	8	1	0	1	9
TBX4	8	1	0	1	9
TCF21	8	1	0	1	9
TMEM158	8	1	0	1	9
TPPP3	8	1	0	1	9
TRHDE	8	1	0	1	9
TRPC6	8	1	0	1	9
TTLL7	8	1	0	1	9
TUBG1	8	1	0	1	9
ENO1	8	0	3	3	11
IL18RAP	8	0	3	3	11
IFT57	9	0	2	2	11
SLC1A1	9	0	2	2	11
CD33	8	0	2	2	10
DPEP2	8	0	2	2	10
ENPP4	8	0	2	2	10
FGR	8	0	2	2	10
PLAC8	8	0	2	2	10
SAMHD1	8	0	2	2	10
ITGA8	9	0	1	1	10
CYC1	8	0	1	1	9
FGL2	8	0	1	1	9
FUT3	8	0	1	1	9
GPI	8	0	1	1	9
MCM7	8	0	1	1	9
NR4A3	8	0	1	1	9
RAB38	8	0	1	1	9
RRM1	8	0	1	1	9
SLC14A1	8	0	1	1	9
SLC6A8	8	0	1	1	9
SPRR1A	8	0	1	1	9
SPTBN2	8	0	1	1	9
SSR4	8	0	1	1	9
THY1	8	0	1	1	9

## Sheet: DOWNDAVID
GAD_DISEASE_CLASS	Count	%	P-Value	Benjamini		GOTERM_BP_DIRECT	Count	%	P-Value	Benjamini		ANGIOGENESIS	GENE NAME		CELL ADHESION	GENE NAME		VASCULOGENESIS	GENE NAME
PHARMACOGENOMIC	47	33.6	9.3e-06	0.00017		angiogenesis	15	10.7	5.58503	2.6e-06		MEIS1	Meis homeobox 1(MEIS1)		CXCL12	C-X-C motif chemokine ligand 12(CXCL12)		RASIP1	Ras interacting protein 1(RASIP1)
NORMALVARIATION	17	12.1	2.2e-05	0.00019		cell adhesion	19	13.6	4.95861	1.1e-05		RASIP1	Ras interacting protein 1(RASIP1)		CD36	CD36 molecule(CD36)		SOX17	SRY-box 17(SOX17)
HEMATOLOGICAL	29	20.7	0.00027	0.0012		vasculogenesis	6	4.3	1.55284	0.028		SOX17	SRY-box 17(SOX17)		PDZD2	PDZ domain containing 2(PDZD2)		CAV1	caveolin 1(CAV1)
CARDIOVASCULAR	57	40.7	0.0011	0.004								TBX4	T-box 4(TBX4)		WISP2	WNT1 inducible signaling pathway protein 2(WISP2)		ENG	endoglin(ENG)
NEUROLOGICAL	41	29.3	0.0034	0.0088								TAL1	TAL bHLH transcription factor 1, erythroid differentiation factor(TAL1)		AOC3	amine oxidase, copper containing 3(AOC3)		FZD4	frizzled class receptor 4(FZD4)
RENAL	24	17.1	0.005	0.011								ACVRL1	activin A receptor like type 1(ACVRL1)		CDH5	cadherin 5(CDH5)		TMEM100	transmembrane protein 100(TMEM100)
METABOLIC	64	45.7	0.0053	0.011								ANGPT1	angiopoietin 1(ANGPT1)		ENG	endoglin(ENG)
DEVELOPMENTAL	24	17.1	0.01	0.018								CAV1	caveolin 1(CAV1)		ITGA8	integrin subunit alpha 8(ITGA8)
VISION	14	10	0.011	0.018								EMCN	endomucin(EMCN)		LYVE1	lymphatic vessel endothelial hyaluronan receptor 1(LYVE1)
REPRODUCTION	16	11.4	0.031	0.047								EPAS1	endothelial PAS domain protein 1(EPAS1)		MFAP4	microfibrillar associated protein 4(MFAP4)
PSYCH	26	18.6	0.06	0.082								LEPR	leptin receptor(LEPR)		MMRN1	multimerin 1(MMRN1)
IMMUNE	36	25.7	0.07	0.089								MMRN2	multimerin 2(MMRN2)		MYH10	myosin heavy chain 10(MYH10)
CANCER	38	27.1	0.073	0.087								ROBO4	roundabout guidance receptor 4(ROBO4)		PODXL	podocalyxin like(PODXL)
												S1PR1	sphingosine-1-phosphate receptor 1(S1PR1)		SELP	selectin P(SELP)
												TMEM100	transmembrane protein 100(TMEM100)		SEMA5A	semaphorin 5A(SEMA5A)
															S1PR1	sphingosine-1-phosphate receptor 1(S1PR1)
															SRPX	sushi repeat containing protein, X-linked(SRPX)
															TNXB	tenascin XB(TNXB)
															VWF	von Willebrand factor(VWF)

## Sheet: UPDAVID
GAD_DISEASE_CLASS	Count	%	P-Value	Benjamini		CANCER	GENE NAME		GAD_DISEASE	Count	%	P-Value	Benjamini		LUNG CANCER	GENE NAME		GOTERM_BP_DIRECT	Count	%	P-Value	Benjamini		CELL DIVISION	GENE NAME		DNA REPLICATION	GENE NAME		CELL PROLIFERATION	GENE NAME		DNA REPAIR	GENE NAME		KEGG_PATHWAY	Count	%	P-Value	Benjamini		CELL CYCLE	GENE NAME		DNA REPLICATION	GENE NAME		Pyrimidine metabolism	GENE NAME
CANCER	71	45.5	9.5e-14	1.7e-12		ABCA12	ATP binding cassette subfamily A member 12(ABCA12)	BC	Breast Cancer	36	23.1	1.9e-18	8.9e-16		APEX1	apurinic/apyrimidinic endodeoxyribonuclease 1(APEX1)		cell division	34	21.8	20.9586	1.1e-21		AURKA	aurora kinase A(AURKA)		CDC6	cell division cycle 6(CDC6)		AURKB	aurora kinase B(AURKB)		ACTL6A	actin like 6A(ACTL6A)		Cell cycle	20	12.8	14.7447	1.8e-15		BUB1B	BUB1 mitotic checkpoint serine/threonine kinase B(BUB1B)		FEN1	flap structure-specific endonuclease 1(FEN1)		NME4	NME/NM23 nucleoside diphosphate kinase 4(NME4)
RENAL	26	16.7	0.0022	0.02		ALDH18A1	aldehyde dehydrogenase 18 family member A1(ALDH18A1)	BCLK	ovarian cancer	18	11.5	1e-07	2.4e-05		AURKA	aurora kinase A(AURKA)		mitotic nuclear division	29	18.6	19.7212	1.9e-20		BIRC5	baculoviral IAP repeat containing 5(BIRC5)		CHAF1A	chromatin assembly factor 1 subunit A(CHAF1A)		BUB1	BUB1 mitotic checkpoint serine/threonine kinase(BUB1)		APEX1	apurinic/apyrimidinic endodeoxyribonuclease 1(APEX1)		DNA replication	9	5.8	6.85387	1.4e-07		BUB1	BUB1 mitotic checkpoint serine/threonine kinase(BUB1)		MCM2	minichromosome maintenance complex component 2(MCM2)		CAD	carbamoyl-phosphate synthetase 2, aspartate transcarbamylase, and dihydroorotase(CAD)
AGING	16	10.3	0.041	0.17		APEX1	apurinic/apyrimidinic endodeoxyribonuclease 1(APEX1)	LK	esophageal adenocarcinoma	16	10.3	1.5e-06	0.00024		BIRC5	baculoviral IAP repeat containing 5(BIRC5)		sister chromatid cohesion	18	11.5	14.0088	9.8e-15		BUB1	BUB1 mitotic checkpoint serine/threonine kinase(BUB1)		CHEK1	checkpoint kinase 1(CHEK1)		BUB1B	BUB1 mitotic checkpoint serine/threonine kinase B(BUB1B)		CHAF1A	chromatin assembly factor 1 subunit A(CHAF1A)		Oocyte meiosis	10	6.4	4.10237	7.9e-05		MAD2L1	MAD2 mitotic arrest deficient-like 1 (yeast)(MAD2L1)		MCM3	minichromosome maintenance complex component 3(MCM3)		RRM1	ribonucleotide reductase catalytic subunit M1(RRM1)
PHARMACOGENOMIC	35	22.4	0.062	0.21		ASPM	abnormal spindle microtubule assembly(ASPM)	BC	breast cancer	19	12.2	2.5e-06	0.0003		CCNA2	cyclin A2(CCNA2)		DNA replication	20	12.8	13.6198	2.4e-14		BUB1B	BUB1 mitotic checkpoint serine/threonine kinase B(BUB1B)		DTL	denticleless E3 ubiquitin protein ligase homolog(DTL)		CENPF	centromere protein F(CENPF)		CHEK1	checkpoint kinase 1(CHEK1)		Pyrimidine metabolism	7	4.5	1.79588	0.016		SKP2	S-phase kinase associated protein 2(SKP2)		MCM4	minichromosome maintenance complex component 4(MCM4)		RRM2	ribonucleotide reductase regulatory subunit M2(RRM2)
						AURKA	aurora kinase A(AURKA)	BC	Leukemia, Lymphocytic, Chronic, B-Cell	11	7.1	4.1e-05	0.0038		CHEK1	checkpoint kinase 1(CHEK1)		G1/S transition of mitotic cell cycle	15	9.6	10.2291	5.9e-11		CCNA2	cyclin A2(CCNA2)		EXO1	exonuclease 1(EXO1)		DLGAP5	DLG associated protein 5(DLGAP5)		EXO1	exonuclease 1(EXO1)		Mismatch repair	4	2.6	1.49485	0.032		TTK	TTK protein kinase(TTK)		MCM6	minichromosome maintenance complex component 6(MCM6)		TK1	thymidine kinase 1(TK1)
						AURKB	aurora kinase B(AURKB)	BC	Bladder Cancer	17	10.9	5.2e-05	0.0041		EXO1	exonuclease 1(EXO1)		mitotic sister chromatid segregation	10	6.4	10.1249	7.5e-11		CCNB1	cyclin B1(CCNB1)		FEN1	flap structure-specific endonuclease 1(FEN1)		DLX5	distal-less homeobox 5(DLX5)		FANCI	Fanconi anemia complementation group I(FANCI)		Progesterone-mediated oocyte maturation	6	3.8	1.45593	0.035		CDC20	cell division cycle 20(CDC20)		PCNA	proliferating cell nuclear antigen(PCNA)		TYMS	thymidylate synthetase(TYMS)
						BIRC5	baculoviral IAP repeat containing 5(BIRC5)	BC	Lung Cancer	18	11.5	5.9e-05	0.004		GPX2	glutathione peroxidase 2(GPX2)		mitotic cytokinesis	9	5.8	7.82391	1.5e-08		CCNB2	cyclin B2(CCNB2)		GINS2	GINS complex subunit 2(GINS2)		KIF15	kinesin family member 15(KIF15)		FEN1	flap structure-specific endonuclease 1(FEN1)								CDC6	cell division cycle 6(CDC6)		RFC2	replication factor C subunit 2(RFC2)		UCK2	uridine-cytidine kinase 2(UCK2)
						BUB1	BUB1 mitotic checkpoint serine/threonine kinase(BUB1)	BC	Hematologic Neoplasms	6	3.8	7.1e-05	0.0042		HPRT1	hypoxanthine phosphoribosyltransferase 1(HPRT1)		G2/M transition of mitotic cell cycle	14	9	7.50864	3.1e-08		CCNE1	cyclin E1(CCNE1)		GINS3	GINS complex subunit 3(GINS3)		KIF2C	kinesin family member 2C(KIF2C)		FOXM1	forkhead box M1(FOXM1)								CHEK1	checkpoint kinase 1(CHEK1)		RFC4	replication factor C subunit 4(RFC4)
						BUB1B	BUB1 mitotic checkpoint serine/threonine kinase B(BUB1B)	BC	lung cancer	16	10.3	0.00014	0.0074		LAPTM4B	lysosomal protein transmembrane 4 beta(LAPTM4B)		chromosome segregation	11	7.1	7.35655	4.4e-08		CCNF	cyclin F(CCNF)		MCM10	minichromosome maintenance 10 replication initiation factor(MCM10)		MCM10	minichromosome maintenance 10 replication initiation factor(MCM10)		PTTG1	pituitary tumor-transforming 1(PTTG1)								CCNA2	cyclin A2(CCNA2)		RNASEH2A	ribonuclease H2 subunit A(RNASEH2A)
						CCNA2	cyclin A2(CCNA2)	BC	Graft vs Host Disease	6	3.8	0.00041	0.019		MAD2L1	MAD2 mitotic arrest deficient-like 1 (yeast)(MAD2L1)		anaphase-promoting complex-dependent catabolic process	11	7.1	6.74473	1.8e-07		CDC20	cell division cycle 20(CDC20)		MCM2	minichromosome maintenance complex component 2(MCM2)		MELK	maternal embryonic leucine zipper kinase(MELK)		RAD51AP1	RAD51 associated protein 1(RAD51AP1)								CCNB1	cyclin B1(CCNB1)
						CCNB1	cyclin B1(CCNB1)	BC	Chronic renal failure|Kidney Failure, Chronic	21	13.5	0.00044	0.019		MMP1	matrix metallopeptidase 1(MMP1)		cell proliferation	18	11.5	5.61979	2.4e-06		CDC6	cell division cycle 6(CDC6)		MCM3	minichromosome maintenance complex component 3(MCM3)		MKI67	marker of proliferation Ki-67(MKI67)		RAD54L	RAD54-like (S. cerevisiae)(RAD54L)								CCNB2	cyclin B2(CCNB2)
						CCNB2	cyclin B2(CCNB2)	BC	chronic obstructive pulmonary disease	13	8.3	0.0007	0.027		MTHFD2	methylenetetrahydrofolate dehydrogenase (NADP+ dependent) 2, methenyltetrahydrofolate cyclohydrolase(MTHFD2)		microtubule-based movement	10	6.4	5.50864	3.1e-06		CDCA3	cell division cycle associated 3(CDCA3)		MCM4	minichromosome maintenance complex component 4(MCM4)		PCNA	proliferating cell nuclear antigen(PCNA)		RFWD3	ring finger and WD repeat domain 3(RFWD3)								CCNE1	cyclin E1(CCNE1)
						CCNE1	cyclin E1(CCNE1)	BC	longevity	13	8.3	0.00088	0.031		MYBL2	MYB proto-oncogene like 2(MYBL2)		DNA repair	14	9	4.88606	1.3e-05		CDCA4	cell division cycle associated 4(CDCA4)		MCM6	minichromosome maintenance complex component 6(MCM6)		PLK1	polo like kinase 1(PLK1)		SMARCB1	SWI/SNF related, matrix associated, actin dependent regulator of chromatin, subfamily b, member 1(SMARCB1)								ESPL1	extra spindle pole bodies like 1, separase(ESPL1)
						CDC20	cell division cycle 20(CDC20)	BC							PCNA	proliferating cell nuclear antigen(PCNA)		spindle organization	6	3.8	4.88606	1.3e-05		CDCA8	cell division cycle associated 8(CDCA8)		PCNA	proliferating cell nuclear antigen(PCNA)		SKP2	S-phase kinase associated protein 2(SKP2)		UNG	uracil DNA glycosylase(UNG)								MCM2	minichromosome maintenance complex component 2(MCM2)
						CDC6	cell division cycle 6(CDC6)	BC							PLK1	polo like kinase 1(PLK1)		mitotic spindle organization	7	4.5	4.88606	1.3e-05		CENPE	centromere protein E(CENPE)		RFC2	replication factor C subunit 2(RFC2)		TPX2	TPX2, microtubule nucleation factor(TPX2)											MCM3	minichromosome maintenance complex component 3(MCM3)
						CENPE	centromere protein E(CENPE)	BC							RAD54L	RAD54-like (S. cerevisiae)(RAD54L)		DNA replication initiation	7	4.5	4.72125	1.9e-05		CENPF	centromere protein F(CENPF)		RFC4	replication factor C subunit 4(RFC4)		TYMS	thymidylate synthetase(TYMS)											MCM4	minichromosome maintenance complex component 4(MCM4)
						CENPF	centromere protein F(CENPF)	BC							RRM1	ribonucleotide reductase catalytic subunit M1(RRM1)		mitotic cell cycle checkpoint	7	4.5	4.72125	1.9e-05		ERCC6L	ERCC excision repair 6 like, spindle assembly checkpoint helicase(ERCC6L)		RNASEH2A	ribonuclease H2 subunit A(RNASEH2A)		UCHL1	ubiquitin C-terminal hydrolase L1(UCHL1)											MCM6	minichromosome maintenance complex component 6(MCM6)
						CHAF1A	chromatin assembly factor 1 subunit A(CHAF1A)	BC							TYMS	thymidylate synthetase(TYMS)		mitotic spindle assembly checkpoint	6	3.8	4.42022	3.8e-05		KIF11	kinesin family member 11(KIF11)		RRM1	ribonucleotide reductase catalytic subunit M1(RRM1)		WDR12	WD repeat domain 12(WDR12)											PTTG1	pituitary tumor-transforming 1(PTTG1)
						CHEK1	checkpoint kinase 1(CHEK1)	BC							BUB1B	BUB1 mitotic checkpoint serine/threonine kinase B(BUB1B)		mitotic metaphase plate congression	7	4.5	4.38722	4.1e-05		KIF14	kinesin family member 14(KIF14)		RRM2	ribonucleotide reductase regulatory subunit M2(RRM2)														PLK1	polo like kinase 1(PLK1)
						COL11A1	collagen type XI alpha 1 chain(COL11A1)	BC							FEN1	flap structure-specific endonuclease 1(FEN1)		regulation of cell cycle	10	6.4	4.10791	7.8e-05		KIF2C	kinesin family member 2C(KIF2C)		TIMELESS	timeless circadian clock(TIMELESS)														PCNA	proliferating cell nuclear antigen(PCNA)
						DTL	denticleless E3 ubiquitin protein ligase homolog(DTL)	BC										cytokinesis	7	4.5	3.74473	0.00018		KIFC1	kinesin family member C1(KIFC1)
						ENO2	enolase 2(ENO2)	BC										DNA strand elongation involved in DNA replication	5	3.2	3.49485	0.00032		MAD2L1	MAD2 mitotic arrest deficient-like 1 (yeast)(MAD2L1)
						ESPL1	extra spindle pole bodies like 1, separase(ESPL1)	BC										mitotic spindle assembly	6	3.8	3.19382	0.00064		NCAPG	non-SMC condensin I complex subunit G(NCAPG)
						EXO1	exonuclease 1(EXO1)	BC										antigen processing and presentation of exogenous peptide antigen via MHC class II	8	5.1	3.1549	0.0007		NDC80	NDC80, kinetochore complex component(NDC80)
						FANCI	Fanconi anemia complementation group I(FANCI)	BC										positive regulation of cytokinesis	6	3.8	3.17393	0.00067		NEK2	NIMA related kinase 2(NEK2)
						FEN1	flap structure-specific endonuclease 1(FEN1)	BC										regulation of chromosome segregation	4	2.6	2.88606	0.0013		OIP5	Opa interacting protein 5(OIP5)
						GMNN	geminin, DNA replication inhibitor(GMNN)	BC										mitotic spindle midzone assembly	4	2.6	2.88606	0.0013		PTTG1	pituitary tumor-transforming 1(PTTG1)
						GPI	glucose-6-phosphate isomerase(GPI)	LK										regulation of transcription involved in G1/S transition of mitotic cell cycle	5	3.2	2.79588	0.0016		RCC1	regulator of chromosome condensation 1(RCC1)
						GPX2	glutathione peroxidase 2(GPX2)	LK										regulation of mitotic metaphase/anaphase transition	4	2.6	2.74473	0.0018		SPAG5	sperm associated antigen 5(SPAG5)
						HMMR	hyaluronan mediated motility receptor(HMMR)	BC										positive regulation of ubiquitin-protein ligase activity involved in regulation of mitotic cell cycle transition	7	4.5	2.72125	0.0019		TIMELESS	timeless circadian clock(TIMELESS)
						HPRT1	hypoxanthine phosphoribosyltransferase 1(HPRT1)	BCLK										protein ubiquitination involved in ubiquitin-dependent protein catabolic process	9	5.8	2.67778	0.0021		TPX2	TPX2, microtubule nucleation factor(TPX2)
						KIF11	kinesin family member 11(KIF11)	BC										DNA unwinding involved in DNA replication	4	2.6	2.63827	0.0023		UBE2C	ubiquitin conjugating enzyme E2 C(UBE2C)
						KIF23	kinesin family member 23(KIF23)	BC										retrograde vesicle-mediated transport, Golgi to ER	7	4.5	2.58503	0.0026		ZWILCH	zwilch kinetochore protein(ZWILCH)
						KIF2C	kinesin family member 2C(KIF2C)	BCLK										metaphase plate congression	4	2.6	2.39794	0.004		ZWINT	ZW10 interacting kinetochore protein(ZWINT)
						LAPTM4B	lysosomal protein transmembrane 4 beta(LAPTM4B)	BC										cell cycle	10	6.4	2.40894	0.0039
						MAD2L1	MAD2 mitotic arrest deficient-like 1 (yeast)(MAD2L1)	BC										collagen catabolic process	6	3.8	2.16749	0.0068
						MCM2	minichromosome maintenance complex component 2(MCM2)	BCLK										DNA damage response, detection of DNA damage	5	3.2	2.14267	0.0072
						MCM3	minichromosome maintenance complex component 3(MCM3)	BC										negative regulation of ubiquitin-protein ligase activity involved in mitotic cell cycle	6	3.8	2	0.01
						MCM4	minichromosome maintenance complex component 4(MCM4)	BC										regulation of mitotic centrosome separation	3	1.9	1.95861	0.011
						MCM6	minichromosome maintenance complex component 6(MCM6)	BCLK										meiotic spindle organization	3	1.9	1.74473	0.018
						MKI67	marker of proliferation Ki-67(MKI67)	BC										regulation of signal transduction by p53 class mediator	7	4.5	1.72125	0.019
						MMP1	matrix metallopeptidase 1(MMP1)	BC										protein autophosphorylation	8	5.1	1.69897	0.02
						MMP14	matrix metallopeptidase 14(MMP14)	BCLK										regulation of ubiquitin-protein ligase activity involved in mitotic cell cycle	4	2.6	1.63827	0.023
						MTHFD2	methylenetetrahydrofolate dehydrogenase (NADP+ dependent) 2, methenyltetrahydrofolate cyclohydrolase(MTHFD2)	BC										homologous chromosome segregation	3	1.9	1.61979	0.024
						MYBL2	MYB proto-oncogene like 2(MYBL2)	BC										regulation of attachment of spindle microtubules to kinetochore	3	1.9	1.49485	0.032
						NDC80	NDC80, kinetochore complex component(NDC80)	BC										attachment of mitotic spindle microtubules to kinetochore	3	1.9	1.37675	0.042
						NEK2	NIMA related kinase 2(NEK2)	BC
						PCNA	proliferating cell nuclear antigen(PCNA)	BCLK
						PLK1	polo like kinase 1(PLK1)	BCLK
						PLOD2	procollagen-lysine,2-oxoglutarate 5-dioxygenase 2(PLOD2)	BC
						PTTG1	pituitary tumor-transforming 1(PTTG1)	BC
						RAD54L	RAD54-like (S. cerevisiae)(RAD54L)	BC
						RFC2	replication factor C subunit 2(RFC2)	BC
						RFC4	replication factor C subunit 4(RFC4)	BC
						RRM1	ribonucleotide reductase catalytic subunit M1(RRM1)	LK
						RSRC1	arginine and serine rich coiled-coil 1(RSRC1)	BC
						SHMT2	serine hydroxymethyltransferase 2(SHMT2)	BCLK
						SKP2	S-phase kinase associated protein 2(SKP2)	BC
						SMARCB1	SWI/SNF related, matrix associated, actin dependent regulator of chromatin, subfamily b, member 1(SMARCB1)	BCLK
						SPAG5	sperm associated antigen 5(SPAG5)	BC
						SPP1	secreted phosphoprotein 1(SPP1)	BCLK
						TIMELESS	timeless circadian clock(TIMELESS)	BCLK
						TOP2A	topoisomerase (DNA) II alpha(TOP2A)	BC
						TPX2	TPX2, microtubule nucleation factor(TPX2)	BC
						TTK	TTK protein kinase(TTK)	BC
						TUBG1	tubulin gamma 1(TUBG1)	BC
						TYMS	thymidylate synthetase(TYMS)	BC
						UCK2	uridine-cytidine kinase 2(UCK2)	BC
						UNG	uracil DNA glycosylase(UNG)	BCLK
						ZWILCH	zwilch kinetochore protein(ZWILCH)	BC
						ZWINT	ZW10 interacting kinetochore protein(ZWINT)	BC

## Sheet: LC&OC NET Cytoscape
Gene	Degree	Betweenness Centrality	Closeness Centrality	Clustering Coefficient	MCODE Score			Pathway	Ratio of Proteins	Number of Proteins	Network proteins	P-Value	FDR	Nodes
AURKB	10	7.0017	0.58181818	0.97777778	8836363636363630			Cell Cycle Checkpoints(R)	0.0218	246	18	1.1102e-16	4.4409e-15	BUB1B,AURKB,CDC20,CCNB2,CCNB1,EXO1,BUB1,RFC4,CDC6,ZWINT,NDC80,CENPE,CENPF,MCM4,BIRC5,KIF2C,MAD2L1,MCM2
BIRC5	17	0.03262419	0.68085106	0.68382353	7.35			Mitotic Prometaphase(R)	0.0155	175	14	1.1102e-16	4.4409e-15	BUB1B,AURKB,CDC20,CCNB2,CCNB1,NEK2,BUB1,ZWINT,NDC80,CENPE,CENPF,BIRC5,KIF2C,MAD2L1
KIF2C	16	0.02359706	0.65306122	0.69166667	8010989010989010			Cell cycle(K)	0.011	124	11	1.2434e-14	3.233e-13	BUB1B,TTK,CDC20,CCNB2,CCNB1,BUB1,CDC6,CCNA2,MCM4,MAD2L1,MCM2
MKI67	11	0.00659023	0.55172414	0.81818182	9.0			Mitotic Metaphase and Anaphase(R)	0.015	170	11	3.7359e-13	5.9774e-12	BUB1B,AURKB,CDC20,BUB1,ZWINT,NDC80,CENPE,CENPF,BIRC5,KIF2C,MAD2L1
KIF23	3	0.0	0.45070423	1.0	3.0			Signaling by Rho GTPases(R)	0.0307	347	11	7.2511e-10	5.8009e-09	BUB1B,AURKB,CDC20,BUB1,ZWINT,NDC80,CENPE,CENPF,BIRC5,KIF2C,MAD2L1
MCM2	8	7.6979	0.56140351	0.92857143	7.0			Mitotic G2-G2/M phases(R)	0.0157	177	9	6.0114e-10	5.8009e-09	HMMR,AURKA,CCNB2,CCNB1,NEK2,MYBL2,CCNA2,TPX2,CENPF
MYBL2	4	0.0	0.44444444	1.0	4.0			RNA Polymerase II Transcription(R)	0.0783	885	9	0.00034534	0.001036	AURKB,AURKA,CCNB1,EXO1,MYBL2,FANCI,RFC4,TPX2,BIRC5
ASPM	18	0.04489348	0.69565217	0.58823529	10.0			PLK1 signaling events(N)	0.0039	44	8	2.8577e-13	5.7154e-12	BUB1B,AURKA,CDC20,CCNB1,BUB1,NDC80,TPX2,CENPE
SPAG5	8	4.8963	0.50793651	0.92857143	7.0			Aurora B signaling(N)	0.0035	40	7	1.317e-11	1.712e-10	AURKB,AURKA,BUB1,KIF23,NDC80,BIRC5,KIF2C
BUB1B	21	0.07111665	0.74418605	0.53809524	8952380952380950			FOXM1 transcription factor network(N)	0.0036	41	7	1.5627e-11	1.7189e-10	AURKB,CCNB2,CCNB1,NEK2,CCNA2,CENPF,BIRC5
CCNB1	18	0.02961696	0.69565217	0.63398693	10.0			Regulation of mitotic cell cycle(R)	0.0073	83	7	2.02e-09	1.616e-08	BUB1B,AURKB,AURKA,CDC20,CCNB1,NEK2,MAD2L1
CCNB2	22	0.06596879	0.76190476	0.57575758	9625			Mitotic G1-G1/S phases(R)	0.0119	134	7	5.2709e-08	3.1626e-07	TOP2A,CCNB1,MYBL2,CDC6,CCNA2,MCM4,MCM2
CDC20	20	0.08198806	0.72727273	0.63157895	9625			Progesterone-mediated oocyte maturation(K)	0.0088	99	6	2.2369e-07	1.3421e-06	AURKA,CCNB2,CCNB1,BUB1,CCNA2,MAD2L1
BUB1	7	0.00226722	0.53333333	0.80952381	6.0			Oocyte meiosis(K)	0.0111	125	6	8.6428e-07	4.3214e-06	AURKA,CDC20,CCNB2,CCNB1,BUB1,MAD2L1
RFC4	2	0.0	0.47058824	1.0	2.0			ATR signaling pathway(N)	0.0033	37	5	5.001e-08	3.1626e-07	RFC4,CDC6,CCNA2,TIMELESS,MCM2
CDC6	5	9.4326	0.49230769	0.7	24000000000000000			Human T-cell leukemia virus 1 infection(K)	0.0194	219	5	0.00025954	0.001036	BUB1B,CDC20,CCNB2,CCNA2,MAD2L1
CENPE	4	0.00160669	0.5	0.66666667	3.0			Aurora A signaling(N)	0.0027	31	4	1.4641e-06	7.3206e-06	AURKB,AURKA,TPX2,BIRC5
CENPF	21	0.04599228	0.74418605	0.60952381	9625			MHC class II antigen presentation(R)	0.0083	94	4	0.00011023	0.00049183	KIF11,KIF23,CENPE,KIF2C
EXO1	15	0.02202259	0.64	0.7047619	8836363636363630			Factors involved in megakaryocyte development and platelet production(R)	0.0096	108	4	0.0001872	0.00074881	KIF11,KIF23,CENPE,KIF2C
CCNA2	3	5.0403	0.47761194	0.66666667	16666666666666600			Synthesis of DNA(R)	0.0104	117	4	0.00025361	0.0010145	RFC4,CDC6,MCM4,MCM2
FANCI	13	0.01907206	0.62745098	0.74358974	8836363636363630			Intra-Golgi and retrograde Golgi-to-ER traffic(R)	0.0131	148	4	0.00061337	0.0018401	KIF11,KIF23,CENPE,KIF2C
HMMR	15	0.0164974	0.65306122	0.71428571	10.0			S Phase(R)	0.0138	156	4	0.00074609	0.0022383	RFC4,CDC6,MCM4,MCM2
KIF11	9	0.00140489	0.53333333	0.88888889	6377777777777770			Cellular senescence(K)	0.0142	160	4	0.00081955	0.002282	CCNB2,CCNB1,MYBL2,CCNA2
MAD2L1	8	0.00739487	0.51612903	0.75	5785714285714280			SUMOylation(R)	0.0155	175	4	0.001141	0.002282	TOP2A,AURKB,AURKA,BIRC5
NDC80	7	3.4402	0.50793651	0.95238095	5785714285714280			DNA replication(K)	0.0032	36	3	0.00012296	0.00049183	RFC4,MCM4,MCM2
NEK2	25	0.16302847	0.82051282	0.45333333	9625			E2F transcription factor network(N)	0.006	68	3	0.00078261	0.002282	MYBL2,CDC6,CCNA2
MCM4	8	0.00337129	0.55172414	0.82142857	7.0			p73 transcription factor network(N)	0.0067	76	3	0.0010771	0.002282	CCNB1,BUB1,CCNA2
TIMELESS	1	0.0	0.4	0.0	0.0			DNA Replication Pre-Initiation(R)	0.0075	85	3	0.0014829	0.0029657	CDC6,MCM4,MCM2
TOP2A	17	0.01395263	0.68085106	0.72794118	8952380952380950			HDR through Homologous Recombination (HRR) or Single Strand Annealing (SSA)(R)	0.0075	85	3	0.0014829	0.0029657	EXO1,RFC4,TIMELESS
TPX2	16	0.02330099	0.65306122	0.71666667	935897435897436			Mismatch repair(K)	0.002	23	2	0.0017339	0.0034677	EXO1,RFC4
TTK	20	0.03819305	0.72727273	0.64210526	9625			Fanconi anemia pathway(N)	0.004	45	2	0.0064015	0.0128	FANCI,RFC4
ZWINT	15	0.06803955	0.65306122	0.6952381	9487179487179480			Validated transcriptional targets of deltaNp63 isoforms(N)	0.004	45	2	0.0064015	0.0128	TOP2A,CCNB2
AURKA	1	0.0	0.42666667	0.0	0.0			Mitotic Prophase(R)	0.006	68	2	0.0141	0.0282	CCNB2,CCNB1
								p53 signaling pathway(K)	0.0064	72	2	0.0157	0.0314	CCNB2,CCNB1
								Platinum drug resistance(K)	0.0065	73	2	0.0161	0.0322	TOP2A,BIRC5
								Validated targets of C-MYC transcriptional activation(N)	0.0067	76	2	0.0174	0.0347	CCNB1,BIRC5
								C-MYB transcription factor network(N)	0.0073	82	2	0.02	0.0391	CCNB1,MCM4
								FoxO signaling pathway(K)	0.0117	132	2	0.0478	0.0478	CCNB2,CCNB1
								Hepatitis B(K)	0.0127	144	2	0.0558	0.0558	CCNA2,BIRC5
								Viral carcinogenesis(K)	0.0178	201	2	0.0992	0.0992	CDC20,CCNA2
								Human immunodeficiency virus 1 infection(K)	0.0188	212	2	0.1084	0.1084	CCNB2,CCNB1
								Deubiquitination(R)	0.0201	227	2	0.1214	0.1214	CDC20,CCNA2
								Aurora C signaling(N)	0.0004	4	1	0.0106	0.0211	AURKB
								b cell survival pathway(B)	0.0012	13	1	0.0339	0.0391	BIRC5
								Mitotic Telophase/Cytokinesis(R)	0.0012	14	1	0.0365	0.0391	KIF23
								Mismatch Repair(R)	0.0013	15	1	0.0391	0.0391	EXO1
								Circadian rhythm pathway(N)	0.0014	16	1	0.0416	0.0416	TIMELESS
								cdk regulation of dna replication(B)	0.0015	17	1	0.0441	0.0441	CDC6
								Signaling events mediated by PRL(N)	0.002	23	1	0.0593	0.0593	CCNA2
								IL2 signaling events mediated by STAT5(N)	0.0025	28	1	0.0717	0.0717	CCNA2
								Resolution of Abasic Sites (AP sites)(R)	0.0027	31	1	0.0791	0.0791	RFC4
								Apoptosis - multiple species(K)	0.0029	33	1	0.084	0.084	BIRC5
								Fanconi Anemia Pathway(R)	0.0032	36	1	0.0913	0.0913	FANCI
								Validated transcriptional targets of AP1 family members Fra1 and Fra2(N)	0.0033	37	1	0.0937	0.0937	CCNA2
								Telomere Maintenance(R)	0.0034	38	1	0.0961	0.0961	RFC4
								DNA Damage Bypass(R)	0.004	45	1	0.1128	0.1128	RFC4
								Integrin-linked kinase signaling(N)	0.004	45	1	0.1128	0.1128	AURKA
								Nucleotide excision repair(K)	0.0042	47	1	0.1175	0.1175	RFC4
								FoxO family signaling(N)	0.0043	49	1	0.1222	0.1222	CCNB1
								Fanconi anemia pathway(K)	0.0048	54	1	0.1338	0.1338	FANCI
								p53 pathway(N)	0.005	57	1	0.1407	0.1407	CCNA2
								ATF-2 transcription factor network(N)	0.0051	58	1	0.143	0.143	CCNA2
								Regulation of retinoblastoma protein(N)	0.0057	64	1	0.1566	0.1566	CCNA2
								Angiogenesis(P)	0.0058	66	1	0.1611	0.1611	BIRC5
								ECM-receptor interaction(K)	0.0073	82	1	0.1962	0.1962	HMMR
								Colorectal cancer(K)	0.0076	86	1	0.2048	0.2048	BIRC5
								Nucleotide Excision Repair(R)	0.009	102	1	0.2381	0.2381	RFC4
								Glycosaminoglycan metabolism(R)	0.0095	107	1	0.2482	0.2482	HMMR
