# Supplementary material for: Identifying General Tumor and Specific Lung Cancer Biomarkers by Transcriptomic Analysis
Source: Biology (Basel). 2022 Jul 20;11(7):1082. doi: 10.3390/biology11071082 (PMC9313083; doi:10.3390/biology11071082)
Supplement: Supplementary file 1 [file biology-11-01082-s001.zip › SP2 Unique genes LC_OC.xlsx]

## Sheet: LCOCunicos
	GSE19804		GSE108055		E-MTAB-5231		E-MTAB-3950		GSE10072		GSE3268		GSE52248.		GSE70089.		GSE81089.		GSE84776.
GENE	DOWN	UP	DOWN	UP	DOWN	UP	DOWN	UP	DOWN	UP	DOWN	UP	DOWN	UP	DOWN	UP	DOWN	UP	DOWN	UP	LC
WFDC1	1		1		1		1		1		1		1		1		1		1		10
DBN1		1		1		1		1		1		1				1		1		1	9
DES	1		1		1		1		1		1				1		1		1		9
DSG2		1		1		1		1		1		1		1		1		1			9
LRRC36	1		1		1		1		1		1				1		1		1		9
PDE5A	1		1		1		1		1		1		1		1		1				9
STXBP6	1		1		1		1		1		1		1				1		1		9
AARS		1		1		1		1		1		1						1		1	8
ACTN2	1				1		1		1				1		1		1		1		8
B4GALT2		1		1		1		1		1		1						1		1	8
BMP5	1		1		1				1		1				1		1		1		8
C1QTNF7	1		1		1		1						1		1		1		1		8
CBLC		1		1		1				1		1		1				1		1	8
CDCP1		1	1			1		1		1		1						1		1	8
CENPO		1		1		1		1		1		1						1		1	8
CHEK2		1				1		1		1		1		1				1		1	8
COBL	1			1	1		1		1		1						1		1		8
DUOX1	1		1		1		1		1		1				1		1				8
FCN3	1		1		1		1		1		1		1				1				8
FERMT1		1				1		1		1		1		1				1		1	8
FOXF1	1		1		1				1		1		1		1		1				8
GREM1		1		1		1		1		1		1				1		1			8
HOXC6		1		1		1		1		1		1						1		1	8
IGSF10	1		1		1		1						1		1		1		1		8
LRRC32	1		1		1				1		1		1		1		1				8
MAMDC2	1		1		1		1						1		1		1		1		8
NUF2		1		1		1		1						1		1		1		1	8
PAK6		1		1		1				1		1		1				1		1	8
RFX2	1			1	1		1		1						1		1		1		8
RSPO1	1		1		1		1						1		1		1		1		8
SEC14L3	1			1	1		1		1						1		1		1		8
SGCA	1		1		1		1		1		1				1		1				8
SYT1		1		1		1		1		1		1						1		1	8
TMPRSS4		1		1		1				1		1		1		1		1			8
TSPAN12	1		1		1		1		1		1						1		1		8
ABCA3	1		1		1				1		1				1		1				7
ABCA9	1		1		1		1						1				1		1		7
ADCY4	1		1		1		1						1		1		1				7
ADCYAP1R1	1				1				1				1		1		1		1		7
ADORA2B		1	1			1	1			1		1						1			7
AGRP	1		1		1				1		1				1		1				7
ALDH3B1	1		1		1		1		1		1						1				7
ANGPTL7	1				1				1		1				1		1		1		7
ARHGAP18	1		1		1		1						1		1		1				7
BIN2	1		1		1				1		1		1				1				7
BPHL		1		1		1	1			1		1						1			7
C1QB	1		1					1	1		1				1		1				7
C2orf40	1		1		1		1								1		1		1		7
CAPN9	1		1		1		1		1								1		1		7
CCT4		1		1		1		1		1		1						1			7
CDC25A		1		1		1				1				1				1		1	7
CDCA5		1		1		1		1								1		1		1	7
CDCA7		1		1		1		1								1		1		1	7
CFTR	1		1		1		1		1		1						1				7
COL5A1		1				1				1		1				1		1		1	7
CRYM		1		1	1		1				1			1					1		7
CTHRC1		1		1		1		1						1		1		1			7
CYP27A1	1		1		1				1		1				1		1				7
DDAH1		1	1		1		1				1			1					1		7
DOCK4	1				1		1		1		1		1				1				7
DTX2		1	1			1	1			1		1						1			7
EIF4G1		1				1		1		1		1						1		1	7
FAM83A		1				1		1						1		1		1		1	7
FANCG		1		1		1				1		1						1		1	7
FAR2	1				1		1		1		1				1		1				7
FLRT3	1		1		1		1		1		1						1				7
FRMD4A	1		1		1				1				1		1		1				7
FUT2		1					1			1		1		1				1	1		7
GATA6	1				1		1		1		1				1		1				7
GRASP	1		1		1								1		1		1		1		7
KCNK3	1				1				1		1		1		1		1				7
KCNT2	1				1		1						1		1		1		1		7
LGI4	1				1		1						1		1		1		1		7
LOXL2		1				1		1		1		1				1		1			7
MARK1		1		1		1				1		1						1		1	7
MND1		1		1		1		1						1				1		1	7
NDUFS6		1				1		1		1		1						1		1	7
NEGR1	1			1	1		1								1		1		1		7
NOC2L		1		1		1		1		1		1						1			7
NOSTRIN	1		1		1		1						1				1		1		7
NPM3		1				1		1		1		1						1		1	7
NXF3	1		1		1				1				1				1		1		7
NXPH4		1		1		1				1		1						1		1	7
PAX9		1		1			1			1				1				1	1		7
PERP		1		1		1		1		1		1						1			7
PLA2G1B	1		1		1				1		1				1		1				7
PLCB4	1			1	1		1		1				1		1						7
PLOD1		1				1		1		1		1						1		1	7
PLXNA1	1		1			1		1	1			1								1	7
POLD2		1				1		1		1		1						1		1	7
POLE		1				1		1		1		1						1		1	7
PPFIA4		1		1						1		1				1		1		1	7
PRKCE	1		1		1		1		1				1				1				7
PSMD8		1		1		1		1		1		1								1	7
PTGER2	1		1		1				1		1						1		1		7
RARA	1		1		1		1		1		1						1				7
RHOJ	1		1		1		1						1				1		1		7
RPGR	1		1		1		1		1		1						1				7
RRP1		1				1		1		1		1						1		1	7
SGMS2	1		1		1		1								1		1		1		7
SLC6A4	1		1		1				1		1		1				1				7
SLCO2A1	1		1		1				1		1		1				1				7
SMPDL3B		1	1			1				1				1		1		1			7
SPRR1B		1				1		1		1		1						1		1	7
TEKT1	1		1		1		1						1				1		1		7
TM6SF1	1		1		1				1		1				1		1				7
TRPV2	1		1		1				1		1				1		1				7
TSFM		1		1		1		1		1		1						1			7
TTC29	1		1		1		1						1				1		1		7
UBE2T		1		1		1		1								1		1		1	7
VSIG2	1		1		1		1								1		1		1		7
VWA3A	1				1		1						1		1		1		1		7
WNT5A		1		1		1		1		1		1						1			7
ZMYND10	1		1		1		1		1								1		1		7
ABCC3		1	1			1				1				1				1			6
ABCF3		1				1		1		1		1						1			6
ACOT11		1		1		1				1		1		1							6
ADHFE1	1		1		1		1										1		1		6
ADM2		1		1						1				1		1		1			6
AGTR2	1				1				1		1				1		1				6
AKNA	1		1		1		1										1		1		6
ANGPTL1	1				1		1								1		1		1		6
ATP5G3		1		1		1		1		1		1									6
BOP1		1		1		1		1		1		1									6
BTNL9	1		1		1								1				1		1		6
C10orf67			1				1						1		1		1		1		6
C1orf131		1		1		1		1										1		1	6
C1QA	1		1		1				1		1						1				6
C20orf85	1		1		1		1										1		1		6
C9orf24	1		1		1		1										1		1		6
CA10		1		1						1				1				1	1		6
CABYR		1				1				1		1				1		1			6
CBR1		1		1		1		1		1		1									6
CCDC17	1		1		1		1										1		1		6
CCDC81	1		1		1		1		1										1		6
CCHCR1		1		1		1				1		1						1			6
CCL2	1		1		1				1		1						1				6
CD300C	1		1		1				1						1		1				6
CDCA2		1		1		1		1										1		1	6
CDK2						1		1		1		1						1		1	6
CIB2		1		1		1				1		1						1			6
CKAP2L		1		1		1		1										1		1	6
CLEC4M	1				1				1		1		1				1				6
CNTN4	1			1	1		1										1		1		6
CNTN6	1		1		1				1		1						1				6
COL13A1	1		1		1		1		1								1				6
COL22A1		1		1		1										1		1		1	6
COL4A4	1		1		1				1					1			1				6
COPS6		1		1		1		1		1		1									6
COX4I2	1		1		1		1								1		1				6
CPXM1		1		1		1										1		1		1	6
CRTAC1	1		1		1				1		1						1				6
CST1		1		1		1				1				1				1			6
CYP24A1		1				1	1			1						1		1			6
CYP2J2		1			1		1			1								1	1		6
CYYR1	1		1		1		1						1				1				6
DCUN1D5		1		1		1		1										1		1	6
DDX10		1		1		1		1		1								1			6
DEPDC1B		1		1		1		1										1		1	6
DNAH1		1	1		1		1										1		1		6
DNAI2	1				1		1		1								1		1		6
DNASE2B	1		1		1				1						1		1				6
DOK2	1		1		1				1		1						1				6
DUOXA1	1		1		1		1								1		1				6
DUSP9		1				1				1		1						1		1	6
E2F7		1		1		1		1										1		1	6
EDC3		1		1		1		1		1		1									6
EFHB	1		1		1		1										1		1		6
EIF3B		1				1		1		1								1		1	6
EIF3I		1	1			1		1		1		1									6
EME1		1		1		1		1										1		1	6
ESAM	1		1		1								1		1		1				6
EXOSC5		1		1		1				1		1						1			6
FAM111B		1		1		1		1										1		1	6
FAM57A		1		1		1				1		1						1			6
FGD5	1		1		1								1		1		1				6
FIGNL1		1		1		1		1										1		1	6
FILIP1	1		1		1		1										1		1		6
FLVCR1		1		1		1		1						1				1			6
FMO3	1		1		1				1		1				1						6
FRMD3	1				1		1						1				1		1		6
FSCN1						1		1		1		1						1		1	6
GAL		1		1		1		1		1										1	6
GALNT2		1				1		1		1								1		1	6
GKN2	1		1		1		1								1		1				6
GLIPR2	1				1		1						1		1		1				6
GNAZ	1			1	1				1				1						1		6
GPC1		1		1		1				1		1								1	6
GPX7		1		1		1				1		1						1			6
GTSE1		1		1		1		1										1		1	6
HCCS		1		1		1		1		1		1									6
HDC	1		1				1		1		1						1				6
HMGCLL1	1			1	1										1		1		1		6
HOXB9		1		1		1				1								1		1	6
HOXC9		1		1		1		1										1		1	6
HOXD11		1		1		1						1						1		1	6
HSPA4L		1		1		1				1		1						1			6
INMT	1		1		1		1						1				1				6
ISYNA1		1		1		1	1			1								1			6
ITGA11		1				1		1								1		1		1	6
IVL		1				1				1				1				1		1	6
KCNA4	1			1	1				1				1						1		6
KLHL6	1		1		1		1										1		1		6
KRT6A		1				1		1		1		1						1			6
L1TD1	1		1		1				1				1				1				6
LEMD1		1		1		1								1				1		1	6
LGI3	1		1		1								1		1		1				6
LILRA1	1			1	1				1		1						1				6
LIN9		1		1		1		1										1		1	6
LMO7	1		1		1				1		1						1				6
LRRC18	1		1		1		1										1		1		6
LRRC46	1		1		1		1										1		1		6
LYPD1		1		1		1				1		1						1			6
MALL		1	1					1			1			1						1	6
MAP3K8	1		1		1				1		1						1				6
MASTL		1		1		1		1										1		1	6
MTCL1		1				1				1		1						1		1	6
MUC15	1		1		1		1										1		1		6
MYADM	1		1		1		1								1		1				6
MYOCD	1				1		1								1		1		1		6
NCBP2		1				1		1		1								1		1	6
NCKAP1L	1		1		1				1		1						1				6
NDRG4	1			1				1	1				1							1	6
NDUFA9		1		1		1		1		1		1									6
NHS		1		1		1	1							1				1			6
NLRC4	1		1		1								1		1		1				6
NLRP3	1		1		1		1		1								1				6
NR0B1		1		1		1				1		1						1			6
NXPH3	1				1				1				1		1		1				6
OCIAD2		1		1		1		1										1		1	6
ODAM	1		1		1				1		1				1						6
OTUD1	1		1		1								1		1		1				6
PARD3B	1				1		1						1				1		1		6
PDE1C	1				1				1				1				1		1		6
PDGFB	1		1		1				1				1				1				6
PGAM5		1		1		1		1										1		1	6
PI16			1		1		1						1				1		1		6
PITX2		1				1				1		1						1		1	6
PLA2G4C	1		1		1				1		1						1				6
PLA2G4F	1		1		1										1		1			1	6
PLAC9	1		1		1								1		1		1				6
PLEKHH2	1		1		1		1								1		1				6
PLN	1				1		1		1								1		1		6
PLS1		1		1			1			1	1								1		6
PODXL2		1		1		1				1		1						1			6
PPP1R14A	1		1		1		1								1		1				6
PRICKLE2	1		1		1		1						1				1				6
PRKAG1		1	1			1		1		1		1									6
PRMT3		1		1		1		1		1								1			6
PTGFRN		1		1		1		1										1		1	6
PTPRH		1		1		1				1		1						1			6
RAI14		1	1			1				1				1				1			6
RAPGEF5	1				1			1	1		1						1				6
RBP2	1		1		1		1								1		1				6
RCC2		1				1		1						1				1		1	6
RGS13	1		1		1				1		1						1				6
RGS22	1		1		1		1										1		1		6
RHPN2		1		1		1	1											1	1		6
RNPS1		1		1		1				1		1						1			6
ROPN1L	1		1		1		1										1		1		6
RPS2		1								1		1		1				1		1	6
S100A16		1	1			1		1										1		1	6
S100A3	1		1						1				1				1			1	6
SAPCD2		1				1								1		1		1		1	6
SCARA5	1		1		1		1										1		1		6
SCUBE1	1				1								1		1		1		1		6
SELPLG	1				1				1		1				1		1				6
SEMA4B		1		1		1										1		1		1	6
SLC18A2	1				1		1		1		1						1				6
SLC1A5		1				1				1		1						1		1	6
SLC25A10		1		1		1				1		1						1			6
SLC25A39		1		1		1		1						1				1			6
SLC39A14				1		1		1		1		1						1			6
SMAD7	1		1		1				1		1						1				6
SMO		1				1				1		1						1		1	6
SMOX		1		1						1		1						1		1	6
SNRPD2		1				1				1		1						1		1	6
SOX5	1				1				1				1		1		1				6
SOX7	1		1		1								1		1		1				6
SPAG4		1		1		1				1						1		1			6
SPAG6	1				1		1		1								1		1		6
SPATA13	1		1		1		1										1		1		6
SPOCK1		1		1		1				1		1						1			6
SRPX2		1	1			1				1		1						1			6
STARD9	1				1								1		1		1		1		6
STOML3	1		1		1		1										1		1		6
STX1A		1		1		1				1						1		1			6
SUV39H1		1		1		1				1		1								1	6
TBX5	1				1				1				1		1		1				6
TCTEX1D1	1		1		1		1										1		1		6
TIMM8B		1				1		1		1		1								1	6
TMEM117		1		1		1		1										1		1	6
TMEM190	1		1		1		1						1						1		6
TMEM41A		1	1			1		1										1		1	6
TMEM71	1		1		1		1						1						1		6
TRAIP		1		1		1				1								1		1	6
TRAP1		1		1		1				1		1						1			6
TRIM2		1		1		1				1				1				1			6
TSPAN18	1		1		1			1					1				1				6
UGT8		1		1		1		1		1								1			6
UQCRH		1		1						1		1						1		1	6
USP5		1		1		1		1				1								1	6
VWA3B	1				1		1						1				1		1		6
WDR63	1		1		1		1										1		1		6
WDR76		1		1		1		1										1		1	6
WFDC2		1					1			1				1				1	1		6
WNT7B		1								1		1		1				1		1	6
XDH		1		1		1				1				1				1			6
XPO5		1		1		1		1						1				1			6
ZBBX	1				1		1		1				1				1				6
ZNF367		1		1		1		1										1		1	6
AHCYL2	1				1		1		1		1										5
ATP5B				1		1		1		1		1									5
BAK1		1	1			1				1		1									5
C4BPA	1		1		1				1		1										5
C7orf49		1				1		1		1		1									5
CCT8		1		1		1				1		1									5
CKB	1			1	1		1		1												5
CLSTN3		1		1				1		1		1									5
COX7A2L				1		1		1		1		1									5
DAD1		1	1			1				1		1									5
DDX49		1		1		1		1		1											5
DLAT		1		1		1				1		1									5
DLK2				1		1	1			1		1									5
DNM2			1			1		1	1		1										5
EIF2S1		1	1			1		1		1											5
ETFA		1				1		1		1		1									5
FNTB		1		1		1				1		1									5
GNAI3		1				1		1		1		1									5
HIST1H2AL		1		1		1				1		1									5
HIST1H4B		1				1		1		1		1									5
HOXB13		1				1		1		1		1									5
ICAM4	1		1		1				1		1										5
IMMT		1		1		1		1		1											5
KRI1		1		1		1		1		1											5
KRT10		1				1		1		1		1									5
MAPK3	1		1		1				1		1										5
MMACHC		1		1		1		1		1											5
MRPS11		1				1		1		1		1									5
MRPS15		1				1		1		1		1									5
MRPS16		1				1		1		1		1									5
MRPS7		1				1		1		1		1									5
MYO10	1		1					1	1		1										5
NDUFA8		1		1		1				1		1									5
NDUFB11		1				1		1		1		1									5
NKRF		1		1		1		1		1											5
OCEL1			1		1		1		1		1										5
PARP2		1		1		1				1		1									5
PHF14		1		1		1		1		1											5
POLDIP2		1		1		1		1		1											5
PON2		1	1					1		1	1										5
PQBP1		1		1		1				1		1									5
PREB		1				1		1		1		1									5
PRKRA				1		1		1		1		1									5
PRR3		1		1		1				1		1									5
PSME3		1		1		1		1		1											5
PTPRU		1	1		1		1			1											5
SETD4		1		1		1				1		1									5
SH3BP1		1	1					1		1		1									5
SHANK2	1		1		1		1		1												5
SLC25A1		1				1		1		1		1									5
SNRNP200		1				1		1		1		1									5
SUPT7L		1				1		1		1		1									5
SYNPO2L	1				1		1		1		1										5
TAF6L		1		1		1			1			1									5
TFDP1		1		1		1				1		1									5
TFDP2				1		1		1		1		1									5
TMEM160	1		1			1			1		1										5
TMEM39A		1				1		1		1		1									5
TMEM5		1		1		1				1		1									5
TNNI3		1		1		1	1			1											5
TRAPPC3		1		1				1		1		1									5
WNT5B		1		1		1				1		1									5
YARS2		1				1		1		1		1									5
ZFPL1		1		1		1				1		1									5
ZNF212		1		1		1				1		1									5
ZNF384		1		1		1		1		1											5
ABTB2		1		1		1				1											4
ACBD6		1		1		1		1													4
ACTL6B		1		1						1		1									4
ACTR1A	1							1	1		1										4
ADK		1				1		1		1											4
ADPRH	1		1		1				1												4
ADPRHL2		1	1			1	1														4
ADSL		1						1		1		1									4
AGBL5		1				1				1		1									4
AGPAT3		1	1							1		1									4
AIFM1		1				1		1		1											4
ALKBH4		1		1		1				1											4
ALKBH6		1		1		1		1													4
ALX3		1		1						1		1									4
AMZ2		1		1		1				1											4
ANKRD37	1		1		1		1														4
ANKRD46	1			1					1		1										4
ANLN		1		1		1		1													4
ANXA10		1				1				1		1									4
API5		1		1		1		1													4
APOBR	1				1				1		1										4
ASCL1		1		1			1			1											4
ATP5C1		1				1		1		1											4
ATP5G2		1				1				1		1									4
ATP5J2		1				1				1		1									4
ATP5L		1				1				1		1									4
ATP6V1B2	1							1	1		1										4
ATP7B	1			1			1		1												4
AURKAIP1		1				1				1		1									4
AVL9		1				1		1		1											4
B4GALT7		1		1		1				1											4
BBS7	1			1			1			1											4
BCS1L		1		1		1				1											4
BLMH				1		1		1				1									4
C15orf41		1		1		1		1													4
C1orf106		1	1							1		1									4
C2	1		1						1		1										4
C20orf24		1						1		1		1									4
C22orf15	1		1		1		1														4
C4BPB		1	1			1				1											4
C8orf59		1	1			1		1													4
CACHD1	1		1		1		1														4
CACNB2	1				1		1		1												4
CALB1		1		1		1				1											4
CAPS	1		1		1		1														4
CBX8		1		1		1				1											4
CCDC51		1				1				1		1									4
CCDC60	1		1		1		1														4
CCDC65	1		1		1		1														4
CCNC		1		1		1				1											4
CCND1	1		1						1		1										4
CD101	1				1				1		1										4
CD82	1		1		1				1												4
CDC42EP1		1	1					1		1											4
CDON	1				1		1		1												4
CENPK		1		1		1		1													4
CENPL		1		1		1		1													4
CEP250		1		1		1				1											4
CHAC2		1		1		1		1													4
CHMP4C		1		1		1		1													4
CHN2	1			1	1		1														4
CHST9	1			1	1		1														4
CKMT1B		1		1						1		1									4
CLDN9		1		1			1			1											4
CLEC14A	1		1		1		1														4
CLTCL1		1		1		1				1											4
CMTM2	1		1		1		1														4
CNNM1		1		1						1		1									4
CNP		1				1				1		1									4
COPS7B		1		1		1		1													4
CPSF2		1		1		1		1													4
CPSF3		1		1		1		1													4
CSTB		1	1			1				1											4
CTRB2		1				1	1			1											4
CXCL3	1				1				1		1										4
CXXC4		1		1			1			1											4
CYB5D2	1			1	1		1														4
CYP4F11		1				1				1		1									4
DCBLD1		1	1			1		1													4
DDX18		1				1		1		1											4
DENND1A				1		1		1		1											4
DGCR6		1		1						1		1									4
DIO1		1			1		1			1											4
DLL1	1			1	1		1														4
DLX4		1				1				1		1									4
DNAH7	1				1		1		1												4
DNAJC11		1				1		1		1											4
DNAJC4		1		1			1			1											4
DNMT3A		1				1		1		1											4
DNPEP	1		1			1			1												4
DPH3	1		1		1		1														4
DPP9		1	1			1		1													4
DPYSL4		1		1		1						1									4
DSCR3			1					1	1		1										4
DUSP18	1		1		1		1														4
DUSP26				1	1		1		1												4
DYNLRB2	1		1		1		1														4
EDN2		1		1		1				1											4
EFTUD2		1	1			1		1													4
EHMT2		1		1		1				1											4
EIF4G3		1		1		1				1											4
ELOVL4		1		1		1				1											4
ELP4				1		1		1	1												4
EMC6		1				1				1		1									4
ENPP5		1		1	1		1														4
ERC2		1		1		1				1											4
F8A1		1		1				1		1											4
FAF2		1				1		1		1											4
FAM104A		1		1		1		1													4
FAM105A	1				1				1		1										4
FAM122B		1		1		1		1													4
FAM3D		1	1		1		1														4
FANK1		1	1		1		1														4
FAT1		1				1		1		1											4
FBXL4		1				1		1		1											4
FBXO22		1		1		1				1											4
FBXO27		1		1		1		1													4
FBXO6		1	1			1	1														4
FGD1		1		1		1						1									4
FGF13		1		1	1					1											4
FGF14	1				1		1		1												4
FJX1				1		1		1				1									4
FLCN	1		1		1				1												4
FOXJ1		1	1		1		1														4
FUCA2		1	1			1		1													4
FUNDC1		1		1		1		1													4
FZD10	1			1		1						1									4
G3BP1		1				1		1		1											4
GDPD1		1		1		1	1														4
GFOD2	1			1	1				1												4
GHITM	1			1				1		1											4
GJA5	1		1		1				1												4
GKAP1	1			1	1		1														4
GNAS		1		1				1		1											4
GNB1L		1				1				1		1									4
GNL3		1		1	1					1											4
GSR		1				1				1		1									4
GSTA1	1		1				1		1												4
GTF2E2		1		1		1				1											4
GTF2F2				1		1		1		1											4
GUCY1A3			1		1			1	1												4
GUF1		1		1		1				1											4
HECTD2	1			1	1		1														4
HGFAC		1		1		1				1											4
HIPK3	1				1		1			1											4
HIST1H2AB		1						1		1		1									4
HIST1H2BB		1				1		1		1											4
HIST1H2BO		1				1		1		1											4
HIST1H3G		1		1				1		1											4
HIST1H4L		1				1		1		1											4
HOXB2		1		1	1					1											4
ICA1L	1			1	1		1														4
ICAM1	1		1						1		1										4
IGFBP7	1		1		1				1												4
IPO13		1				1				1		1									4
ISL1		1		1			1			1											4
ITGB8		1				1				1		1									4
JDP2	1		1		1		1														4
KARS		1				1		1		1											4
KCNJ5			1		1		1		1												4
KCTD10	1		1		1			1													4
KLHDC9		1		1	1		1														4
L2HGDH		1		1		1				1											4
LANCL2		1		1						1		1									4
LASP1		1				1		1		1											4
LEO1		1		1		1		1													4
LGALS4		1	1				1			1											4
LIMD1	1				1				1		1										4
LRFN3		1		1		1				1											4
LRFN4		1		1		1				1											4
LRRC23	1		1		1		1														4
LRRC31		1	1				1			1											4
LRRC4C	1			1	1		1														4
LRRC8C	1		1		1			1													4
LRRFIP2	1		1		1				1												4
LSM10		1	1			1		1													4
LYRM4				1		1				1		1									4
LYST	1		1		1				1												4
LZIC		1		1		1		1													4
MACROD2	1		1		1		1														4
MAFK	1				1		1			1											4
MAP3K11	1		1						1		1										4
MAP6	1			1	1		1														4
MAPK15		1	1		1		1														4
MCAT		1		1		1				1											4
MEPE		1				1	1			1											4
MERTK		1				1		1				1									4
MINDY2	1				1				1		1										4
MINDY3	1				1				1		1										4
MIPOL1		1		1		1	1														4
MR1		1	1					1		1											4
MRPL11		1				1				1		1									4
MRPL4		1				1		1		1											4
MRPL44				1		1		1		1											4
MRPS18A		1				1				1		1									4
MRPS18B		1				1				1		1									4
MS4A2	1		1		1				1												4
MTA1		1		1		1				1											4
MTA3		1		1		1		1													4
MYL12A	1				1				1		1										4
N6AMT1		1				1				1	1										4
NCOA7	1		1		1		1														4
NDUFA1		1				1				1		1									4
NDUFC2		1		1						1		1									4
NDUFS3		1		1		1				1											4
NEB				1		1		1		1											4
NEK8		1	1		1		1														4
NELFE		1				1				1		1									4
NIT1		1		1		1				1											4
NKX2-1			1				1		1		1										4
NKX2-5		1				1				1		1									4
NME7				1		1	1			1											4
NMT1		1				1		1		1											4
NOL12		1						1		1		1									4
NONO		1		1						1		1									4
NPTXR		1		1						1		1									4
NRCAM	1			1		1		1													4
NSUN2		1		1		1		1													4
NSUN7		1		1	1		1														4
NTHL1		1				1				1	1										4
NTN4	1		1		1		1														4
NUDCD1		1		1		1		1													4
NUPL2		1		1		1				1											4
OPA1				1		1		1		1											4
OPLAH		1	1			1				1											4
OSMR		1	1			1				1											4
OSTF1	1		1					1	1												4
P2RX1	1		1		1				1												4
PCDHB4	1			1	1		1														4
PCGF1		1				1		1		1											4
PHC1	1			1					1		1										4
PHF12		1		1		1		1													4
PHYH		1			1		1				1										4
PHYHD1	1		1		1		1														4
PHYHIPL		1		1		1	1														4
PIGA	1		1						1		1										4
PIGL		1				1	1			1											4
PIGR		1	1		1		1														4
PIGW		1		1		1		1													4
PIK3R2		1		1						1		1									4
PLA2G5	1		1		1				1												4
PLCB2			1		1		1		1												4
PLCB3		1	1			1		1													4
PLD1		1				1		1		1											4
PLEKHO2	1				1				1		1										4
POLR1B		1				1		1	1												4
POPDC3	1			1		1		1													4
PPAN		1						1		1		1									4
PPFIBP1	1		1					1	1												4
PPFIBP2		1	1							1		1									4
PPIL1		1		1		1		1													4
PPP1CC				1		1		1		1											4
PPP2R3B		1		1		1				1											4
PRICKLE3		1				1		1		1											4
PRKX	1		1					1	1												4
PRSS2		1		1		1				1											4
PRSS3		1		1		1				1											4
PTGES2		1		1		1				1											4
PTK6		1				1	1			1											4
PTPRD	1			1	1				1												4
RAB3B		1		1		1				1											4
RABEPK		1				1				1		1									4
RASSF4		1	1			1				1											4
RASSF6		1		1		1	1														4
RBBP8		1						1		1		1									4
RBM24	1			1	1		1														4
RBP1	1							1	1			1									4
RBPMS2	1		1		1		1														4
REEP4		1				1		1				1									4
REEP6		1		1		1	1														4
RER1		1		1		1				1											4
RFWD2		1	1			1		1													4
RFXAP	1			1	1					1											4
RHBDL1		1		1		1				1											4
RIC3		1		1	1		1														4
RIPK3		1	1		1		1														4
RND1	1				1				1		1										4
RND2		1		1						1		1									4
RNF121		1				1		1		1											4
RNF181		1	1			1		1													4
RNF26		1		1		1		1													4
RORC		1			1		1			1											4
RPSA		1		1						1		1									4
RTL10		1				1				1		1									4
RTL8A		1				1				1		1									4
SAT2	1		1		1		1														4
SCTR		1			1				1		1										4
SDK1		1		1		1	1														4
SEC22A						1		1		1		1									4
SELE	1				1		1		1												4
SEM1		1				1				1		1									4
SEMA4F		1		1		1				1											4
SF3B2		1		1		1				1											4
SFTPA1	1		1						1		1										4
SLC23A1	1		1		1		1														4
SLC26A2	1				1		1		1												4
SLC30A1		1		1		1				1											4
SLC35C2		1				1		1		1											4
SLC39A11		1	1			1		1													4
SMARCC1		1		1		1				1											4
SMG5		1				1		1		1											4
SMG9		1				1				1		1									4
SNF8		1				1		1		1											4
SNTB1			1		1		1			1											4
SP1	1		1					1		1											4
SPATA18	1		1		1		1														4
SPIDR	1					1				1		1									4
SRCAP		1				1		1		1											4
SRRD		1				1		1		1											4
SSR1		1				1		1		1											4
SSR3		1				1		1		1											4
SSSCA1		1				1		1		1											4
ST6GALNAC5	1				1				1		1										4
ST6GALNAC6	1		1		1		1														4
ST8SIA1	1		1		1				1												4
STAM2	1				1		1			1											4
STAP2		1				1				1		1									4
STK3		1	1			1				1											4
STK33	1			1	1		1														4
STMN2		1		1	1					1											4
STOML2		1		1		1				1											4
STOX1		1		1	1		1														4
STYK1		1				1				1		1									4
SUV39H2		1				1		1		1											4
SYT5		1				1				1		1									4
TACO1		1				1				1		1									4
TAF12		1				1		1		1											4
TAF6		1		1		1				1											4
TCF19		1		1		1		1													4
TCP11L1		1		1		1				1											4
TDRD10	1		1		1		1														4
TEKT3	1		1		1		1														4
TEX10				1		1		1				1									4
TEX14	1				1				1		1										4
TIMM44		1		1		1				1											4
TIMM9		1				1				1		1									4
TM9SF4		1		1		1				1											4
TMEM2	1		1						1		1										4
TMPRSS2			1		1		1		1												4
TNC		1	1			1				1											4
TNIP2			1			1		1		1											4
TNNI3K	1			1			1		1												4
TNNT2	1		1		1				1												4
TP53INP2	1			1	1		1														4
TP53RK		1		1		1		1													4
TRIM28				1				1		1		1									4
TRIM58	1				1				1		1										4
TSPAN32			1		1		1		1												4
TSPAN6		1					1			1		1									4
TTC16	1		1		1		1														4
TTC25	1		1		1		1														4
TTC9C		1		1		1		1													4
TUBA4B	1				1		1		1												4
TUBGCP4		1				1		1				1									4
TXLNB	1			1	1		1														4
TXNDC12		1		1		1		1													4
TXNDC5		1						1		1		1									4
UBA1		1				1		1		1											4
UBA6		1				1		1		1											4
UBB	1				1				1		1										4
UBXN4		1				1		1		1											4
USB1		1				1				1		1									4
USH1C		1		1			1			1											4
USP37		1		1		1		1													4
USP54	1		1		1		1														4
UTP6		1				1		1		1											4
VAC14		1				1		1		1											4
VCP		1				1		1		1											4
VPS33A		1		1		1				1											4
VPS45		1		1		1				1											4
VPS54		1		1		1				1											4
WDR3		1				1				1		1									4
WDR35	1			1	1		1														4
WDR46		1				1				1		1									4
WDR66		1	1			1	1														4
WDR70		1				1		1		1											4
WDR78	1				1		1		1												4
XRCC3		1		1		1				1											4
YIPF3		1		1		1				1											4
YPEL4	1			1	1		1														4
YWHAG		1		1		1		1													4
ZBTB4	1		1		1		1														4
ZBTB41		1		1		1		1													4
ZC3H3		1				1				1		1									4
ZCCHC17		1		1		1		1													4
ZDHHC18		1				1		1		1											4
ZDHHC4		1		1		1				1											4
ZFP28	1			1	1		1														4
ZFP3	1			1	1		1														4
ZKSCAN4		1		1		1				1											4
ZMYM3		1		1		1				1											4
ZMYM6	1		1						1		1										4
ZNF174		1		1		1						1									4
ZNF3		1		1		1				1											4
ZNF532				1		1				1		1									4
ZNF536	1			1	1				1												4
ZNF576		1		1		1				1											4
ZNF589			1		1			1	1												4
ZNF662	1		1		1		1														4
ZNF7		1		1		1				1											4
ZNF770				1		1		1		1											4
ZNF787		1	1			1				1											4
ZW10		1				1		1		1											4
AADACL2	1					1	1														3
AADAT		1		1			1														3
AARS2		1		1		1															3
ABCA13		1	1				1														3
ABCB8		1				1				1											3
ABCC8		1		1					1												3
ABHD12		1				1		1													3
ABHD18		1				1				1											3
ABL2			1			1		1													3
ACACA		1				1		1													3
ACE2		1				1				1											3
ACRBP	1		1		1																3
ACSS2			1		1			1													3
ACVR1C		1		1		1															3
ADAM12		1				1		1													3
ADAMTS13					1		1		1												3
ADCK5		1		1		1															3
ADCYAP1	1			1	1																3
ADPRHL1		1		1			1														3
ADSSL1		1		1			1														3
AFAP1L1	1		1		1																3
AFF3	1		1		1																3
AFG3L2				1				1		1											3
AGR3			1		1		1														3
AGTRAP		1	1			1															3
AKAP14	1				1		1														3
AKT1S1		1		1		1															3
ALKBH2		1		1		1															3
ALMS1				1			1		1												3
ALS2CR12	1				1		1														3
AMD1	1		1					1													3
AMIGO1	1			1	1																3
AMMECR1L	1					1		1													3
AMOTL1	1				1			1													3
ANAPC11		1		1		1															3
ANKDD1A	1		1		1																3
ANKFY1	1				1				1												3
ANKRD13A	1		1		1																3
ANKRD16		1		1		1															3
ANKRD22		1				1		1													3
ANKRD29	1		1		1																3
ANKRD35	1				1		1														3
ANKRD45		1			1		1														3
ANKS1B				1	1		1														3
ANP32A	1		1						1												3
ANTXR1			1					1		1											3
ANXA2	1		1						1												3
AP2M1						1		1				1									3
AP3M1				1		1		1													3
AP4M1				1		1				1											3
APCDD1	1				1		1														3
APLNR					1				1		1										3
APOBEC2		1		1						1											3
APOBEC4	1				1		1														3
AQP11		1		1		1															3
ARHGAP20	1				1		1														3
ARHGAP21	1		1		1																3
ARHGAP30	1		1		1																3
ARHGEF26	1				1				1												3
ARL6	1				1		1														3
ARL9		1		1		1															3
ARMC2	1				1		1														3
ARMC3	1				1		1														3
ARMCX3		1		1	1																3
ARNT2	1			1					1												3
ARRDC2	1		1		1																3
ARRDC4	1		1		1																3
ASPHD1		1		1		1															3
ASPHD2		1		1		1															3
ATF7IP2		1	1		1																3
ATG16L2	1		1		1																3
ATG4A				1	1				1												3
ATG7			1						1		1										3
ATL1	1				1		1														3
ATL2		1				1		1													3
ATOH8	1		1		1																3
ATP10B		1				1				1											3
ATP5A1				1					1			1									3
ATP5E		1				1				1											3
ATP5G1		1				1				1											3
ATP5H		1				1				1											3
ATP5I		1				1				1											3
ATP6V0A4		1					1			1											3
ATP6V1E2		1		1		1															3
ATPAF1		1		1		1															3
ATRNL1		1						1			1										3
B3GALNT2		1		1				1													3
B4GALNT4		1		1		1															3
BAALC	1				1				1												3
BARX1		1		1						1											3
BCDIN3D		1		1		1															3
BCL2L12		1	1			1															3
BCL6B	1		1		1																3
BCO2	1				1		1														3
BEAN1		1				1				1											3
BEND7	1				1		1														3
BEST1			1		1				1												3
BEST4		1		1			1														3
BET1L		1								1		1									3
BICDL1		1				1				1											3
BIRC6				1		1		1													3
BMF		1				1		1													3
BMPR1B	1				1		1														3
BMS1		1				1				1											3
BOC				1	1		1														3
BOD1		1				1		1													3
BOLA3		1		1		1															3
BRCC3		1				1				1											3
BRF2		1		1		1															3
BRI3BP		1		1		1															3
BRINP3	1				1				1												3
BRMS1L		1		1		1															3
BRPF3		1		1		1															3
BTBD10				1		1		1													3
BTBD11		1		1		1															3
BTBD9		1			1		1														3
BTF3L4		1		1		1															3
BTN2A1	1		1						1												3
BTRC	1			1	1																3
C10orf128	1		1		1																3
C10orf76	1								1		1										3
C10orf95	1				1				1												3
C11orf21	1				1				1												3
C11orf52		1		1			1														3
C12orf56		1		1		1															3
C12orf65		1		1		1															3
C14orf2		1				1				1											3
C16orf52	1			1	1																3
C16orf54	1				1		1														3
C16orf71					1		1			1											3
C17orf58		1		1		1															3
C17orf62		1				1				1											3
C17orf80		1		1		1															3
C18orf21		1				1		1													3
C18orf54	1			1		1															3
C19orf25		1		1		1															3
C1orf122		1		1		1															3
C1orf158	1		1		1																3
C1orf162	1		1		1																3
C1orf198	1		1		1																3
C1orf228		1			1		1														3
C1orf43		1				1		1													3
C1orf54	1		1						1												3
C1orf74		1		1		1															3
C1orf87	1		1		1																3
C1QC	1		1					1													3
C1QTNF2	1				1		1														3
C20orf196		1		1		1															3
C22orf23	1				1		1														3
C2orf15		1		1		1															3
C2orf73	1				1		1														3
C3orf58	1		1					1													3
C3orf62	1		1				1														3
C4orf22	1		1		1																3
C5orf24				1	1			1													3
C5orf34		1		1		1															3
C5orf42		1					1			1											3
C5orf51		1				1		1													3
C6orf118	1				1		1														3
C6orf136		1		1		1															3
C8orf34	1		1		1																3
C8orf46	1				1		1														3
C9orf152		1	1		1																3
C9orf72	1				1		1														3
C9orf85			1			1		1													3
CA5B	1		1		1																3
CABLES1	1		1		1																3
CABLES2		1		1		1															3
CACNA1B		1				1						1									3
CACNG6		1	1				1														3
CACTIN		1				1				1											3
CAMK2N2		1		1		1															3
CAMTA1		1		1					1												3
CAPN5		1					1			1											3
CAPS2	1				1		1														3
CAPSL	1				1		1														3
CARD11		1	1			1															3
CARM1				1		1		1													3
CARS		1		1						1											3
CASP7			1						1		1										3
CASZ1			1				1		1												3
CATSPERB		1					1			1											3
CC2D1B		1	1			1															3
CCDC114	1				1		1														3
CCDC117		1				1		1													3
CCDC12	1		1		1																3
CCDC127		1		1		1															3
CCDC13		1			1		1														3
CCDC137		1	1			1															3
CCDC138		1		1		1															3
CCDC14		1		1				1													3
CCDC146	1				1		1														3
CCDC15		1		1						1											3
CCDC24		1		1			1														3
CCDC3	1			1	1																3
CCDC34		1		1		1															3
CCDC43		1				1		1													3
CCDC78	1				1		1														3
CCDC85A	1		1		1																3
CCDC96	1				1		1														3
CCL19		1	1							1											3
CCL28		1			1		1														3
CCL7		1				1				1											3
CCL8	1		1							1											3
CCNK		1				1				1											3
CCRL2	1								1		1										3
CCT6B		1					1			1											3
CD109	1					1		1													3
CD1E					1		1			1											3
CD276		1				1		1													3
CD300LF	1		1		1																3
CD7	1		1							1											3
CDAN1		1		1		1															3
CDC42EP5	1		1		1																3
CDCA7L		1	1			1															3
CDH12				1	1		1														3
CDH15		1								1		1									3
CDK5R2		1		1		1															3
CDK6	1					1						1									3
CEACAM8			1		1		1														3
CEL		1		1								1									3
CENPH		1		1		1															3
CEP131		1				1				1											3
CGGBP1	1				1					1											3
CGNL1	1		1		1																3
CHMP1A		1				1		1													3
CHMP3	1				1				1												3
CHRNA10					1		1		1												3
CHTF18		1		1		1															3
CISD2		1				1		1													3
CLDN1		1				1				1											3
CLDN12		1		1		1															3
CLEC12A	1		1		1																3
CLIC6		1	1				1														3
CLPTM1L		1				1		1													3
CLSPN		1				1		1													3
CMBL		1		1		1															3
CMTM4				1	1		1														3
CMTM5	1				1		1														3
CMTM8			1		1		1														3
CNFN		1		1		1															3
CNIH2		1		1			1														3
CNIH3		1				1				1											3
CNNM2		1			1				1												3
CNPY2		1								1		1									3
CNTD1	1				1		1														3
CNTN1				1				1		1											3
CNTN3		1		1	1																3
COL11A2		1							1			1									3
COL2A1		1			1					1											3
COMMD2	1		1					1													3
COPS7A		1				1		1													3
COPS8		1		1						1											3
COQ10A				1	1		1														3
CORO1C	1		1					1													3
COX11				1		1				1											3
COX7B2		1				1	1														3
CP		1				1				1											3
CPAMD8	1		1		1																3
CPT1C		1		1		1															3
CPTP		1								1		1									3
CRISP2	1				1		1														3
CRISP3	1				1		1														3
CRLF1		1		1						1											3
CRLS1		1	1			1															3
CSAG3		1				1				1											3
CSNK1G1				1		1				1											3
CSNK1G3				1		1				1											3
CSRNP1	1				1		1														3
CST2		1		1						1											3
CSTF2T	1			1				1													3
CTSC			1					1			1										3
CTXND1	1				1				1												3
CWF19L1	1					1			1												3
CXCL17		1			1		1														3
CYB561D1	1			1	1																3
CYGB	1		1		1																3
CYP11A1			1				1		1												3
CYP2E1				1		1	1														3
CYP2U1	1				1		1														3
CYP4V2	1				1		1														3
CYP4X1			1		1		1														3
DAGLB		1	1			1															3
DAPL1		1		1		1															3
DBF4B		1				1				1											3
DBNDD2	1								1		1										3
DBNL		1	1					1													3
DCDC1	1				1		1														3
DCDC2	1		1				1														3
DCPS		1				1				1											3
DDIT3			1							1		1									3
DDX11		1				1				1											3
DDX12P		1								1		1									3
DDX31		1		1		1															3
DDX55		1				1		1													3
DENND4A	1				1				1												3
DEPDC7		1		1		1															3
DGKH	1						1			1											3
DHRS13		1		1		1															3
DHRSX		1		1		1															3
DIO3OS	1				1		1														3
DIP2B				1		1		1													3
DISP2		1		1		1															3
DLL3		1		1						1											3
DMRTA2		1		1		1															3
DNAH11		1			1		1														3
DNAH12	1				1		1														3
DNAH14		1				1		1													3
DNAJB11		1		1				1													3
DNAJB13		1			1		1														3
DNAJC19				1		1		1													3
DNAJC21		1				1		1													3
DNAJC5		1		1		1															3
DNASE1		1		1						1											3
DNHD1			1		1		1														3
DOCK11	1		1		1																3
DOCK7		1		1		1															3
DOCK8	1		1		1																3
DPP6	1			1					1												3
DSEL	1		1		1																3
DTX1		1		1	1																3
DTX3L			1			1		1													3
DUSP23		1	1			1															3
DVL1		1				1				1											3
DYDC1	1				1		1														3
DYDC2	1				1		1														3
E2F2		1		1		1															3
EAF1	1			1		1															3
EARS2		1		1		1															3
EBAG9			1						1		1										3
EEF1G		1								1		1									3
EEF2K			1		1		1														3
EEFSEC		1				1		1													3
EGFL6	1		1						1												3
EIF1AD		1				1		1													3
EIF2S3		1						1		1											3
EIF3J						1		1		1											3
EIF4E3	1				1		1														3
ELAVL4		1		1						1											3
ELOA					1				1		1										3
ELOA-AS1		1				1				1											3
EMC1		1				1				1											3
ENKUR	1				1		1														3
ENPP1		1			1					1											3
ENPP3		1			1		1														3
EPB41L4A-AS2	1				1				1												3
EPB41L5	1		1						1												3
EPC1	1			1	1																3
EPSTI1			1			1		1													3
ERC1	1							1	1												3
ERCC8		1				1				1											3
ERN2		1			1		1														3
ERVMER34-1		1				1				1											3
ESCO1		1		1		1															3
ESCO2		1		1		1															3
ESPN		1		1			1														3
ESRRA		1	1							1											3
ESRRG		1		1			1														3
ESS2		1				1						1									3
EXOSC2				1		1		1													3
EXTL2				1			1		1												3
EXTL3				1		1				1											3
EYA4	1				1		1														3
FAAH2		1		1			1														3
FAAP24		1				1				1											3
FAM107B			1		1		1														3
FAM114A1		1	1							1											3
FAM117B		1				1		1													3
FAM133A		1		1		1															3
FAM136A				1		1		1													3
FAM174A	1				1		1														3
FAM24B		1		1		1															3
FAM3A		1				1				1											3
FAM43A	1		1					1													3
FAM46B	1		1		1																3
FAM76B	1			1				1													3
FAM81A		1		1			1														3
FAM83D		1		1		1															3
FAM83E		1	1							1											3
FAM83F		1		1		1															3
FAM96A		1				1		1													3
FANCB		1				1		1													3
FANCD2		1				1		1													3
FARS2	1		1						1												3
FARSB		1				1		1													3
FASTK		1				1				1											3
FASTKD2						1				1		1									3
FAT3	1			1	1																3
FBXL16		1		1			1														3
FBXL17		1		1	1																3
FBXL2				1	1		1														3
FBXL21		1		1		1															3
FBXO15	1				1		1														3
FBXO16		1		1			1														3
FBXO30	1			1				1													3
FBXO32		1		1		1															3
FEM1C					1				1		1										3
FGB		1				1				1											3
FGD4	1				1		1														3
FGF18	1				1				1												3
FGFBP1			1			1				1											3
FGFBP2	1		1		1																3
FGFR1OP2	1			1				1													3
FGFRL1		1	1				1														3
FIBIN	1		1		1																3
FIZ1		1		1		1															3
FKBP10		1						1		1											3
FKBP14		1				1				1											3
FKBP15			1						1		1										3
FMNL1	1								1		1										3
FNBP1L		1		1						1											3
FNDC5		1		1	1																3
FOXD1		1		1		1															3
FOXG1		1		1						1											3
FOXN4		1		1	1																3
FOXP1	1				1		1														3
FOXP4		1		1				1													3
FOXQ1		1	1			1															3
FOXRED1		1		1		1															3
FRK		1				1				1											3
FRMD6		1				1		1													3
FRMPD3		1		1		1															3
FSD1L	1				1		1														3
FSIP1	1				1		1														3
FSTL5				1		1	1														3
FUT6		1					1			1											3
FXR2	1				1				1												3
FYTTD1	1					1		1													3
G2E3		1				1		1													3
GAB3	1		1		1																3
GALK1			1			1				1											3
GALM		1	1			1															3
GALNT3		1				1				1											3
GATS	1			1			1														3
GBA2	1			1			1														3
GBP5	1		1			1															3
GCM1		1					1			1											3
GDAP1				1		1				1											3
GEMIN5		1		1		1															3
GFRA1	1				1		1														3
GGT6		1			1		1														3
GHDC		1			1		1														3
GHRH				1			1		1												3
GIMAP1	1		1		1																3
GIMAP2	1		1		1																3
GIMAP7	1		1		1																3
GIMAP8	1		1		1																3
GJB2		1				1		1													3
GJB6		1				1		1													3
GK2	1					1			1												3
GLDN	1		1		1																3
GLI1		1			1		1														3
GLS2		1		1						1											3
GLTP			1					1	1												3
GMCL1		1		1		1															3
GNB4	1		1					1													3
GNGT1		1				1				1											3
GNPNAT1		1		1		1															3
GNPTG		1		1	1																3
GORAB		1				1		1													3
GPBAR1	1		1		1																3
GPC4		1	1						1												3
GPIHBP1	1				1		1														3
GPR137		1		1						1											3
GPR146	1		1		1																3
GPR173		1				1				1											3
GPR180		1		1		1															3
GPR37		1				1				1											3
GPR82		1				1		1													3
GPR88		1		1						1											3
GPRASP2	1			1	1																3
GPRIN1		1		1		1															3
GPRIN2	1				1				1												3
GRHL1		1				1		1													3
GRIK2		1					1			1											3
GRIN3A		1		1			1														3
GRTP1		1				1			1												3
GSTO2		1		1			1														3
GUCY1B2		1		1						1											3
GUCY1B3	1				1				1												3
GZF1				1		1		1													3
H1FX				1		1						1									3
HABP2		1		1						1											3
HACL1	1				1		1														3
HAMP		1				1				1											3
HAPLN1		1		1	1																3
HAS3		1	1					1													3
HCG18		1				1			1												3
HCST	1		1		1																3
HDAC8		1		1		1															3
HDHD2	1			1	1																3
HECW2	1		1		1																3
HERC2P3	1				1				1												3
HEXIM2		1		1		1															3
HEYL	1				1					1											3
HHIP	1		1		1																3
HHLA2		1					1			1											3
HIP1			1					1	1												3
HIST1H1D		1				1						1									3
HIST1H2AG		1				1				1											3
HIST1H2AK		1								1		1									3
HIST1H3I		1						1		1											3
HLA-C			1						1		1										3
HLA-DQB2		1	1					1													3
HM13		1				1		1													3
HOXC4		1				1				1											3
HOXD10				1		1				1											3
HPCA		1		1						1											3
HPS3		1				1		1													3
HRAS				1		1						1									3
HSD11B1L		1		1			1														3
HSD11B2		1				1			1												3
HSD17B3	1						1		1												3
HSH2D		1	1			1															3
HSPA12B	1		1		1																3
HUNK		1					1		1												3
HVCN1	1		1		1																3
HYLS1		1		1		1															3
IDH3A				1		1				1											3
IFT172		1			1		1														3
IGF2BP2			1			1						1									3
IGFL2		1		1		1															3
IGLL1		1					1			1											3
IGSF9		1		1		1															3
IL15RA	1								1		1										3
IL1RL2		1				1				1											3
IL27RA		1	1							1											3
INO80E		1				1	1														3
INSL4		1				1				1											3
INTS11		1				1				1											3
INTS2				1		1		1													3
INTS4		1		1		1															3
IQCA1					1		1					1									3
IQCG	1		1				1														3
IQCH				1			1		1												3
IQGAP3		1		1				1													3
IQUB	1				1		1														3
IRX1	1		1		1																3
IRX2	1		1		1																3
ISOC2		1				1				1											3
ITIH3	1				1				1												3
ITLN1	1				1		1														3
JAKMIP2	1			1					1												3
JAZF1	1			1	1																3
JPH1	1		1					1													3
JPH4	1			1	1																3
KATNAL1	1			1	1																3
KATNAL2				1	1		1														3
KBTBD2	1								1		1										3
KBTBD6		1		1		1															3
KBTBD8	1		1		1																3
KCNB2		1		1			1														3
KCNE3	1				1		1														3
KCNN3	1						1		1												3
KCNQ3		1				1				1											3
KCNRG	1		1				1														3
KCTD17		1		1	1																3
KCTD3	1			1				1													3
KCTD6				1	1		1														3
KDELC2			1			1		1													3
KIAA0141					1				1		1										3
KIAA1324L	1		1		1																3
KIAA1328	1				1		1														3
KIAA1586	1			1		1															3
KIAA1683			1		1		1														3
KIF9	1				1		1														3
KIFC2		1		1		1															3
KISS1R		1		1		1															3
KLHDC1	1				1		1														3
KLHDC3				1				1				1									3
KNDC1	1				1		1														3
KRT20		1								1		1									3
KRT31				1		1						1									3
KRT80		1		1		1															3
KXD1		1				1				1											3
LARS		1							1		1										3
LAS1L		1				1				1											3
LATS2	1		1		1																3
LCA5L	1				1		1														3
LCLAT1		1				1		1													3
LDHAL6B		1					1			1											3
LEMD2		1		1		1															3
LGALS3BP		1						1		1											3
LGR6		1			1		1														3
LHPP		1		1						1											3
LHX2		1		1		1															3
LIME1		1								1		1									3
LIN7A	1				1				1												3
LINC00472	1				1				1												3
LINC00663		1			1					1											3
LINC00963	1				1				1												3
LIPG				1		1				1											3
LMBR1				1		1		1													3
LRCH2	1			1	1																3
LRFN5	1			1	1																3
LRGUK	1				1		1														3
LRIG3		1		1		1															3
LRP11		1		1			1														3
LRRC34	1				1		1														3
LRRC45		1		1		1															3
LRRC6			1		1		1														3
LRRK2	1		1		1																3
LRRN1		1		1			1														3
LRRN4CL	1				1		1														3
LSM14B		1								1		1									3
LTBR						1		1		1											3
LY6D		1				1				1											3
LY6K		1				1		1													3
LYAR	1		1			1															3
LYPD6		1		1		1															3
LYPLAL1		1				1		1													3
LYSMD1		1		1		1															3
LYZL6		1				1				1											3
M6PR			1			1		1													3
MACROD1		1		1						1											3
MAD1L1		1				1				1											3
MAD2L2		1		1		1															3
MADD				1					1		1										3
MAFG						1		1		1											3
MAGEA1		1				1				1											3
MAGEA12		1				1				1											3
MAGOH2P		1				1				1											3
MAK16	1					1		1													3
MAL2		1	1			1															3
MAML2	1				1		1														3
MAML3				1	1		1														3
MANEAL		1		1		1															3
MAP1LC3A				1	1		1														3
MAP1S		1		1		1															3
MAP3K13		1				1				1											3
MAP7D2		1		1		1															3
MAPK8IP1		1		1	1																3
MAPKAP1						1		1		1											3
MARCH10	1				1		1														3
MARS2				1		1		1													3
MARVELD3		1		1		1															3
MBTPS2		1				1				1											3
MCM3AP-AS1		1				1				1											3
MCM8		1				1		1													3
MCMBP	1					1			1												3
MDH1B	1				1		1														3
MECR		1				1				1											3
MED1						1		1		1											3
MED10				1		1		1													3
MED11		1	1		1																3
MED13L	1				1				1												3
MED19		1		1		1															3
MED29		1		1		1															3
MEIS3		1		1	1																3
MELTF		1				1				1											3
MESP1		1		1		1															3
MEX3B		1		1		1															3
MFSD11		1				1			1												3
MFSD3		1		1		1															3
MFSD7		1	1				1														3
MGST1		1	1			1															3
MIAT		1		1		1															3
MICALCL	1		1		1																3
MMP10		1				1				1											3
MNS1	1				1		1														3
MON1A		1			1		1														3
MORN5	1				1		1														3
MOV10		1	1			1															3
MRGPRF	1		1		1																3
MRPL1		1		1		1															3
MRPL20		1				1				1											3
MRPL23		1	1							1											3
MRPL30		1				1		1													3
MRPL32		1				1		1													3
MRPL37		1				1		1													3
MRPL45		1		1		1															3
MRPL47		1				1		1													3
MRPL51		1				1		1													3
MRPL54	1		1		1																3
MRPS2						1				1		1									3
MRPS21		1				1		1													3
MRPS23		1				1		1													3
MRPS26		1		1		1															3
MRPS5		1				1		1													3
MS4A4A	1								1		1										3
MS4A7	1		1		1																3
MSC				1		1				1											3
MSLN	1		1				1														3
MSRB3	1		1		1																3
MSTO1		1		1						1											3
MTBP		1		1		1															3
MTHFD1L		1				1		1													3
MUC4		1					1			1											3
MUC5B		1			1					1											3
MUCL1		1		1			1														3
MYH2	1				1				1												3
MYH3	1				1		1														3
MYT1L	1			1	1																3
N4BP2		1		1		1															3
N4BP3	1								1		1										3
NAIP	1								1		1										3
NANOS1		1		1		1															3
NAP1L5	1			1	1																3
NARS		1		1						1											3
NCS1		1								1		1									3
NDFIP2				1		1	1														3
NDUFA3			1			1				1											3
NDUFA4		1	1							1											3
NDUFA7		1				1				1											3
NDUFB9		1				1		1													3
NEFH		1		1						1											3
NEFL		1		1				1													3
NEK4							1			1	1										3
NEK5	1				1		1														3
NEK6		1	1			1															3
NEXN	1		1		1																3
NFATC2	1				1		1														3
NFATC4		1			1					1											3
NFIA	1				1		1														3
NFKBIB			1			1				1											3
NFKBIZ	1		1		1																3
NFXL1		1		1		1															3
NGEF		1		1		1															3
NIN	1			1	1																3
NIPA1				1		1		1													3
NIPSNAP3A	1			1	1																3
NKAP		1		1		1															3
NKD2	1		1		1																3
NLGN4X	1			1					1												3
NLRP11		1		1		1															3
NLRP12	1		1		1																3
NMUR2		1			1		1														3
NOC4L		1		1		1															3
NOL4				1		1				1											3
NOP58		1				1		1													3
NOS1AP		1		1						1											3
NOX4		1				1				1											3
NPHP3	1		1		1																3
NPNT	1		1		1																3
NPTX2		1		1						1											3
NR2C2AP		1				1		1													3
NRDC		1				1				1											3
NRM		1				1		1													3
NRSN2		1		1						1											3
NRTN				1		1				1											3
NRXN3				1			1		1												3
NSMCE2		1		1		1															3
NSUN4		1				1		1													3
NT5M		1		1								1									3
NUDCD2		1		1		1															3
NUDT16L1		1		1		1															3
NUP35				1		1		1													3
OAZ1	1							1	1												3
ODC1	1							1				1									3
ODF3L1	1				1		1														3
OGDH			1					1			1										3
OPRK1		1		1		1															3
OR51E1		1		1		1															3
OSBPL6	1				1		1														3
OSCAR	1		1		1																3
OTUD6B				1		1		1													3
PACSIN1		1		1			1														3
PAEP		1				1				1											3
PAFAH1B2	1							1		1											3
PAH		1		1						1											3
PAIP2	1			1	1																3
PAK5		1								1		1									3
PAQR3				1		1				1											3
PARD6G				1		1		1													3
PARG		1				1				1											3
PARP14	1		1					1													3
PARS2		1		1		1															3
PARVG	1		1		1																3
PCDH18	1			1	1																3
PCDHA3	1				1				1												3
PCDHB15	1			1	1																3
PCGF5	1			1	1																3
PCK2		1	1						1												3
PCSK2				1	1				1												3
PCYOX1L		1		1					1												3
PCYT2		1								1	1										3
PDAP1		1						1		1											3
PDCD1LG2	1		1						1												3
PDCD2L		1		1		1															3
PDE1B		1			1							1									3
PDE7B	1				1		1														3
PDIK1L		1		1		1															3
PDP1		1				1				1											3
PDPN	1		1						1												3
PDRG1		1		1		1															3
PDZD11		1				1		1													3
PEBP4	1		1		1																3
PEG10	1			1							1										3
PEX11G		1	1				1														3
PFKL		1				1						1									3
PGM2L1		1		1		1															3
PHB		1				1				1											3
PHF13		1		1		1															3
PHF19		1		1		1															3
PHF23		1		1		1															3
PHF6		1				1		1													3
PHF7		1					1		1												3
PHLDB2	1		1					1													3
PIAS2				1						1		1									3
PIAS4		1		1		1															3
PIGM		1		1		1															3
PIGN				1		1				1											3
PIGS		1				1		1													3
PIGU		1		1		1															3
PIGX		1				1		1													3
PIH1D2	1				1		1														3
PITPNA	1				1				1												3
PKD2L1		1	1						1												3
PKIB		1		1			1														3
PKP2				1			1			1											3
PLAC1		1				1				1											3
PLCD4				1	1		1														3
PLCH1		1								1	1										3
PLD6		1				1	1														3
PLGRKT		1				1				1											3
PLIN2	1								1		1										3
PLRG1		1	1			1															3
PMCH		1				1				1											3
PMS2P1		1				1				1											3
PNCK		1		1		1															3
PNPLA7	1				1		1														3
PNPO		1				1				1											3
PNPT1		1				1		1													3
PODN			1		1		1														3
POLA1		1				1		1													3
POLD1		1								1		1									3
POLE4			1			1		1													3
POLK	1			1	1																3
POLR3A		1		1		1															3
PORCN		1				1				1											3
POU2F3		1				1				1											3
PPEF1		1				1				1											3
PPEF2		1				1	1														3
PPHLN1		1				1		1													3
PPM1K	1		1		1																3
PPM1M	1		1		1																3
PPP1R12C	1		1		1																3
PPP1R15B	1				1			1													3
PPP1R16A		1		1			1														3
PPP1R3F		1		1	1																3
PPP2R2C		1		1		1															3
PPT2				1			1					1									3
PQLC3	1		1		1																3
PRAF2		1		1						1											3
PRAM1	1		1		1																3
PRB3		1			1					1											3
PRDM15		1		1		1															3
PRDX5			1		1		1														3
PRELID2		1				1		1													3
PREX1	1		1		1																3
PRICKLE1	1		1		1																3
PRKG1	1				1				1												3
PRMT6		1		1		1															3
PROCA1		1		1			1														3
PROX1		1		1						1											3
PRPF38A		1				1		1													3
PRPF6		1				1				1											3
PRR4				1			1			1											3
PRRT1				1	1		1														3
PRRT3		1		1			1														3
PRSS53		1								1		1									3
PRTFDC1		1		1		1															3
PSD3		1								1		1									3
PTGR1		1				1		1													3
PTMS	1							1	1												3
PTP4A2		1	1							1											3
PTPRS	1				1					1											3
PTTG1IP		1	1								1										3
PUSL1		1		1		1															3
PYGO2		1		1		1															3
PYROXD2		1			1		1														3
RAB10		1				1		1													3
RAB13		1	1							1											3
RAB28	1			1	1																3
RAB34		1	1			1															3
RAB37	1				1		1														3
RAB39B	1			1		1															3
RAB6A	1							1	1												3
RAB8B	1				1				1												3
RABGGTB		1		1						1											3
RAD17		1		1						1											3
RAMP1		1		1						1											3
RASAL1		1		1						1											3
RASEF		1		1			1														3
RASGEF1A		1		1		1															3
RBM20	1			1	1																3
RCAN3					1					1		1									3
RCCD1		1		1		1															3
RCN1		1				1				1											3
RCSD1	1		1		1																3
RDH12		1		1		1															3
RELB			1			1				1											3
RERG	1		1		1																3
RGS14		1				1				1											3
RGS18	1		1		1																3
RHBDD3		1		1						1											3
RHOU			1		1		1														3
RHPN1		1		1			1														3
RIDA		1				1				1											3
RIMKLB	1				1		1														3
RIN2	1		1						1												3
RIOK1				1		1		1													3
RIOX2		1				1				1											3
RMND1		1		1		1															3
RNF112	1				1		1														3
RNF122	1		1		1																3
RNF141	1				1					1											3
RNF145	1		1		1																3
RNF149	1		1					1													3
RNF157		1		1		1															3
RNF180	1			1	1																3
RNF182	1			1	1																3
RNF183		1		1			1														3
RNF186		1		1						1											3
RNF207		1				1	1														3
RNF213		1				1		1													3
RNF5		1								1		1									3
RNPC3		1			1		1														3
ROBO2	1		1		1																3
ROR2		1		1						1											3
RPL13AP17	1				1		1														3
RPL30			1			1				1											3
RPLP0		1								1		1									3
RPRD1B		1				1		1													3
RPRML		1			1		1														3
RPS10		1								1		1									3
RPS18		1								1		1									3
RPS19BP1		1				1		1													3
RPUSD1		1		1		1															3
RPUSD2		1				1				1											3
RPUSD3		1	1			1															3
RRP8		1				1				1											3
RSBN1L		1		1		1															3
RSPH1	1				1		1														3
RSPH3			1		1		1														3
RSPH9	1				1		1														3
RSPO2	1		1		1																3
RSPO3	1		1		1																3
RTKN		1		1		1															3
RTKN2	1				1			1													3
RTN4IP1		1		1		1															3
RTRAF		1				1				1											3
RTTN	1			1		1															3
RUNX2		1		1		1															3
SAAL1		1		1		1															3
SALL4		1		1		1															3
SAMD1		1		1		1															3
SAMD4B				1		1		1													3
SASS6		1				1		1													3
SCARF2	1		1		1																3
SCD5	1				1				1												3
SCFD1		1				1				1											3
SCGB3A1			1		1		1														3
SCGB3A2	1		1		1																3
SCN3B	1				1				1												3
SCN4B	1				1		1														3
SCYL1		1				1		1													3
SDCBP2		1	1			1															3
SDHAF3		1				1				1											3
SENP8		1		1		1															3
SERPINB13		1				1						1									3
SERPINB4		1								1		1									3
SERTAD1	1		1		1																3
SESN3		1		1				1													3
SF3B5			1			1		1													3
SFT2D3		1		1		1															3
SFXN4		1		1		1															3
SFXN5		1		1		1															3
SGPP2		1		1		1															3
SH3D19	1		1		1																3
SH3GL2	1			1	1																3
SHANK3	1		1		1																3
SHE	1		1		1																3
SHROOM3	1				1		1														3
SIGMAR1		1				1				1											3
SIN3A	1			1		1															3
SIRPB1	1		1		1																3
SIRT5		1				1				1											3
SIX4		1		1		1															3
SKIV2L		1				1				1											3
SKIV2L2				1						1	1										3
SLC10A3		1	1			1															3
SLC13A3		1			1		1														3
SLC22A18AS		1				1				1											3
SLC25A16			1		1			1													3
SLC25A25	1				1		1														3
SLC25A29		1			1		1														3
SLC27A1			1		1		1														3
SLC2A11		1				1				1											3
SLC2A4RG		1				1				1											3
SLC30A6		1				1		1													3
SLC30A7		1	1					1													3
SLC35E2		1		1	1																3
SLC35F3		1		1		1															3
SLC36A4		1		1		1															3
SLC38A7		1				1				1											3
SLC38A9		1				1		1													3
SLC39A3		1		1		1															3
SLC40A1	1		1		1																3
SLC44A2	1		1		1																3
SLC44A5		1				1		1													3
SLC46A2	1		1		1																3
SLC4A3		1		1						1											3
SLC5A1			1		1		1														3
SLC6A1				1					1		1										3
SLC7A6OS		1	1			1															3
SLC9A9	1		1		1																3
SLFN11	1		1		1																3
SLU7	1		1		1																3
SMAD1		1								1		1									3
SMAD9	1				1		1														3
SMARCAL1		1				1				1											3
SMOC2		1		1	1																3
SNAPC1						1				1		1									3
SNRPB2						1		1		1											3
SNX22	1		1		1																3
SNX25	1		1		1																3
SNX30	1		1		1																3
SNX8		1	1		1																3
SORCS1				1	1		1														3
SOX13	1			1					1												3
SOX2		1								1		1									3
SOX3				1	1					1											3
SP6	1					1	1														3
SPANXC		1								1		1									3
SPATA12		1				1	1														3
SPATA4	1				1		1														3
SPEF1	1				1		1														3
SPHK2		1		1					1												3
SPIN3		1		1		1															3
SPOCK3		1					1			1											3
SPPL2A		1	1			1															3
SPPL2B		1		1		1															3
SPRYD4		1		1		1															3
SRP68		1				1		1													3
SSTR1	1				1				1												3
SSX1		1								1		1									3
ST3GAL4			1		1					1											3
ST6GALNAC1		1	1				1														3
ST7L	1			1					1												3
STK40	1			1	1																3
STMN3		1		1						1											3
STRBP		1		1		1															3
STRN4				1		1				1											3
STYX		1				1		1													3
SULF2				1		1		1													3
SULT1C2		1	1							1											3
SUMF1			1		1		1														3
SUPV3L1						1		1		1											3
SURF6		1		1		1															3
SUSD2	1		1		1																3
SUSD5		1			1				1												3
T		1		1						1											3
TANC1	1		1		1																3
TAOK2	1				1				1												3
TBC1D10C	1		1		1																3
TBC1D7		1		1		1															3
TCEA3		1	1		1																3
TCEAL7	1			1	1																3
TCEAL8		1		1	1																3
TDRD5		1		1		1															3
TDRD7	1								1		1										3
TDRKH		1		1		1															3
TEKT2	1				1		1														3
TFAP4		1		1						1											3
TFPT		1	1			1															3
THAP9				1		1				1											3
THBS4		1		1						1											3
THOC6		1				1				1											3
THUMPD2		1				1				1											3
THUMPD3		1		1		1															3
TICAM2		1	1								1										3
TIGD2		1		1		1															3
TIGD7		1		1		1															3
TIMM50		1				1		1													3
TLDC1		1				1				1											3
TM4SF18	1		1		1																3
TMEM108	1			1	1																3
TMEM125	1		1		1																3
TMEM129		1		1	1																3
TMEM130		1		1	1																3
TMEM139	1		1		1																3
TMEM14B		1				1				1											3
TMEM169		1		1		1															3
TMEM173			1		1		1														3
TMEM182		1		1		1															3
TMEM184A		1		1			1														3
TMEM206		1				1		1													3
TMEM220	1				1		1														3
TMEM50B					1		1			1											3
TMEM54		1				1		1													3
TMEM56		1			1		1														3
TMEM61		1		1			1														3
TMEM63A		1	1							1											3
TMEM63C		1		1		1															3
TMEM68		1		1		1															3
TMEM69		1		1		1															3
TMEM79		1		1		1															3
TMEM87B		1				1		1													3
TMEM88	1		1		1																3
TMEM9		1		1		1															3
TMPRSS11D		1				1						1									3
TMPRSS6		1		1						1											3
TMSB4X	1								1		1										3
TMSB4Y		1			1				1												3
TMTC1	1			1	1																3
TMTC2	1		1				1														3
TMTC4		1		1		1															3
TNFAIP8L1	1		1		1																3
TNFRSF10A		1	1			1															3
TNR	1								1		1										3
TOMM70		1				1				1											3
TOP1MT		1				1		1													3
TOP3A		1				1						1									3
TOP3B		1				1				1											3
TOR2A		1		1		1															3
TOX				1	1				1												3
TPCN2		1	1			1															3
TPRKB						1		1		1											3
TRAF2		1				1				1											3
TRAF7		1				1		1													3
TRDMT1	1				1		1														3
TRGV9	1								1		1										3
TRIM11		1		1		1															3
TRIM17		1								1		1									3
TRIM21	1		1						1												3
TRIM32		1		1		1															3
TRIM56	1		1		1																3
TRIM65		1	1			1															3
TRMT6		1				1		1													3
TRPC2					1				1		1										3
TRPC3	1				1				1												3
TRPT1		1		1		1															3
TRPV4		1	1				1														3
TSEN15		1				1		1													3
TSEN54		1		1		1															3
TSHZ1	1			1	1																3
TSHZ3	1		1		1																3
TSSC4	1			1					1												3
TTC21A	1		1		1																3
TTC4		1								1		1									3
TTC7A	1		1		1																3
TTC8		1				1	1														3
TTLL5		1		1			1														3
TTYH3		1				1		1													3
TUBB2B		1		1						1											3
TUBB3				1						1		1									3
TUBE1	1			1	1																3
TXNL4B		1		1		1															3
TYRP1			1		1				1												3
UACA	1		1		1																3
UBAC2		1		1		1															3
UBE2F		1		1		1															3
UBE2J2		1		1		1															3
UBQLN1	1			1				1													3
UBXN10		1			1		1														3
UGT1A3		1								1		1									3
UHMK1		1				1		1													3
UHRF1		1		1				1													3
UHRF1BP1		1				1		1													3
ULK3		1		1		1															3
UNC93B1			1				1				1										3
UPB1		1	1						1												3
UPRT				1	1		1														3
UQCRQ		1				1				1											3
URGCP		1				1				1											3
USHBP1	1		1		1																3
USP51		1			1		1														3
UTP15		1		1		1															3
VARS2		1		1		1															3
VASH2				1		1				1											3
VASP	1		1		1																3
VAX2		1		1		1															3
VEPH1	1		1		1																3
VEZT		1	1			1															3
VIL1		1				1				1											3
VMO1			1		1		1														3
VNN1			1				1				1										3
VPS25		1		1		1															3
VPS37A				1		1		1													3
VRTN		1			1				1												3
VTA1				1		1		1													3
WASHC4	1								1		1										3
WASHC5		1				1				1											3
WDR17	1				1		1														3
WDR24		1		1		1															3
WDR31		1		1			1														3
WDR5B		1		1						1											3
WDR62		1		1						1											3
WDR75		1				1		1													3
WDR86		1		1		1															3
WFDC3		1				1	1														3
WRB				1	1		1														3
WRN				1		1				1											3
WTIP	1		1		1																3
XKRX		1				1	1														3
XPR1		1		1		1															3
XRN1	1			1				1													3
XYLB		1				1				1											3
YIF1B		1				1	1														3
YIPF2		1		1						1											3
YPEL2	1			1	1																3
ZBTB2	1					1		1													3
ZBTB46	1		1		1																3
ZBTB47	1				1		1														3
ZC3H8		1		1		1															3
ZC3HAV1L		1				1		1													3
ZC3HC1		1		1		1															3
ZDHHC12		1	1			1															3
ZDHHC15				1	1		1														3
ZDHHC16		1	1			1															3
ZDHHC2	1			1	1																3
ZDHHC3	1		1						1												3
ZDHHC5		1				1		1													3
ZDHHC9		1				1		1													3
ZG16B		1			1		1														3
ZIC2		1		1		1															3
ZKSCAN3		1				1				1											3
[truncated: 9,271 more rows]

## Sheet: Down
GENE
WFDC1
DES
LRRC36
PDE5A
STXBP6
ACTN2
BMP5
C1QTNF7
DUOX1
FCN3
FOXF1
IGSF10
LRRC32
MAMDC2
RSPO1
SGCA
TSPAN12
ABCA3
ABCA9
ADCY4
ADCYAP1R1
AGRP
ALDH3B1
ANGPTL7
ARHGAP18
BIN2
C2orf40
CAPN9
CFTR
CYP27A1
DOCK4
FAR2
FLRT3
FRMD4A
GATA6
GRASP
KCNK3
KCNT2
LGI4
NOSTRIN
NXF3
PLA2G1B
PRKCE
PTGER2
RARA
RHOJ
RPGR
SGMS2
SLC6A4
SLCO2A1
TEKT1
TM6SF1
TRPV2
TTC29
VSIG2
VWA3A
ZMYND10
ADHFE1
AGTR2
AKNA
ANGPTL1
BTNL9
C10orf67
C1QA
C20orf85
C9orf24
CCDC17
CCDC81
CCL2
CD300C
CLEC4M
CNTN6
COL13A1
COX4I2
CRTAC1
CYYR1
DNAI2
DNASE2B
DOK2
DUOXA1
EFHB
ESAM
FGD5
FILIP1
FMO3
FRMD3
GKN2
GLIPR2
HDC
INMT
KLHL6
L1TD1
LGI3
LMO7
LRRC18
LRRC46
MAP3K8
MUC15
MYADM
MYOCD
NCKAP1L
NLRC4
NLRP3
NXPH3
ODAM
OTUD1
PARD3B
PDE1C
PDGFB
PI16
PLA2G4C
PLAC9
PLEKHH2
PLN
PPP1R14A
PRICKLE2
RBP2
RGS13
RGS22
ROPN1L
S100A3
SCARA5
SCUBE1
SELPLG
SLC18A2
SMAD7
SOX5
SOX7
SPAG6
SPATA13
STARD9
STOML3
TBX5
TCTEX1D1
TMEM190
TMEM71
VWA3B
WDR63
ZBBX

## Sheet: Up
GENE
DBN1
DSG2
AARS
B4GALT2
CBLC
CENPO
CHEK2
FERMT1
GREM1
HOXC6
NUF2
PAK6
SYT1
TMPRSS4
CCT4
CDC25A
CDCA5
CDCA7
COL5A1
CTHRC1
EIF4G1
FAM83A
FANCG
LOXL2
MARK1
MND1
NDUFS6
NOC2L
NPM3
NXPH4
PERP
PLOD1
POLD2
POLE
PPFIA4
PSMD8
RRP1
SPRR1B
TSFM
UBE2T
WNT5A
ABCF3
ACOT11
ADM2
ATP5G3
BOP1
C1orf131
CABYR
CBR1
CCHCR1
CDCA2
CDK2
CIB2
CKAP2L
COL22A1
COPS6
CPXM1
CST1
DCUN1D5
DDX10
DEPDC1B
DUSP9
E2F7
EDC3
EIF3B
EME1
EXOSC5
FAM111B
FAM57A
FIGNL1
FLVCR1
FSCN1
GAL
GALNT2
GPC1
GPX7
GTSE1
HCCS
HOXB9
HOXC9
HOXD11
HSPA4L
ITGA11
IVL
KRT6A
LEMD1
LIN9
LYPD1
MASTL
MTCL1
NCBP2
NDUFA9
NR0B1
OCIAD2
PGAM5
PITX2
PODXL2
PRMT3
PTGFRN
PTPRH
RCC2
RNPS1
RPS2
SAPCD2
SEMA4B
SLC1A5
SLC25A10
SLC25A39
SLC39A14
SMO
SMOX
SNRPD2
SPAG4
SPOCK1
STX1A
SUV39H1
TIMM8B
TMEM117
TRAIP
TRAP1
TRIM2
UGT8
UQCRH
USP5
WDR76
WNT7B
XDH
XPO5
ZNF367

## Sheet: DownDavid
GAD_DISEASE_CLASS	Count	%	P-Value	Benjamini		GAD_DISEASE	Count	%	P-Value	Benjamini			Tobacco Use Disorder	GENE NAME			Lung disease	GENE NAME
CARDIOVASCULAR	52	37.4	0.0022	0.038		Tobacco Use Disorder	34	0.2	0.066	0.99			EFHB	EF-hand domain family member B(EFHB)			ABCA3	ATP binding cassette subfamily A member 3(ABCA3)
IMMUNE	38	27.3	0.0071	0.062		Arteries	5	0	0.046	0.99			FRMD3	FERM domain containing 3(FRMD3)			CFTR	cystic fibrosis transmembrane conductance regulator(CFTR)
PSYCH	24	17.3	0.067	0.34		Hematocrit	5	0	0.016	1			FRMD4A	FERM domain containing 4A(FRMD4A)
CHEMDEPENDENCY	39	28.1	0.08	0.31		Depressive Disorder, Major	4	0	0.053	0.99			LMO7	LIM domain 7(LMO7)
						Hepatopulmonary Syndrome|Liver Cirrhosis	4	0	0.046	1			MAMDC2	MAM domain containing 2(MAMDC2)
						Cardiomyopathy, Dilated|DCM - Dilated cardiomyopathy	3	0	0.045	1			SOX5	SRY-box 5(SOX5)
						anorexia nervosa	3	0	0.045	1			TBX5	T-box 5(TBX5)
						Conduct Disorder	3	0	0.027	1			WDR63	WD repeat domain 63(WDR63)
						Dementia|	2	0	0.058	0.99			ACTN2	actinin alpha 2(ACTN2)
						Cardiomyopathy, Hypertrophic|Hypertrophic Cardiomyopathy|Hypertrophy, Left Ventricular|Left Ventricular Hypertrophy	2	0	0.05	0.99			BMP5	bone morphogenetic protein 5(BMP5)
						PR interval	2	0	0.082	1			BIN2	bridging integrator 2(BIN2)
						antidepressant response	2	0	0.042	1			CAPN9	calpain 9(CAPN9)
						Parkinson's disease; alcohol abuse	2	0	0.017	1			CRTAC1	cartilage acidic protein 1(CRTAC1)
						Lung disease	2	0	0.025	1			CNTN6	contactin 6(CNTN6)
													DOCK4	dedicator of cytokinesis 4(DOCK4)
													DNAI2	dynein axonemal intermediate chain 2(DNAI2)
													FAR2	fatty acyl-CoA reductase 2(FAR2)
													HDC	histidine decarboxylase(HDC)
													MAP3K8	mitogen-activated protein kinase kinase kinase 8(MAP3K8)
													MYOCD	myocardin(MYOCD)
													NOSTRIN	nitric oxide synthase trafficking(NOSTRIN)
													PARD3B	par-3 family cell polarity regulator beta(PARD3B)
													PDE1C	phosphodiesterase 1C(PDE1C)
													PDE5A	phosphodiesterase 5A(PDE5A)
													PRKCE	protein kinase C epsilon(PRKCE)
													RHOJ	ras homolog family member J(RHOJ)
													RGS22	regulator of G-protein signaling 22(RGS22)
													SCARA5	scavenger receptor class A member 5(SCARA5)
													SLC18A2	solute carrier family 18 member A2(SLC18A2)
													SLC6A4	solute carrier family 6 member 4(SLC6A4)
													STXBP6	syntaxin binding protein 6(STXBP6)
													TEKT1	tektin 1(TEKT1)
													TTC29	tetratricopeptide repeat domain 29(TTC29)
													VWA3B	von Willebrand factor A domain containing 3B(VWA3B)

## Sheet: UpDavid
GAD_DISEASE	Count	%	P-Value	Benjamini
serum creatinine	2	1.6	0.021	1
Epilepsy|Mental Retardation	2	1.6	0.035	0.99
Breast Neoplasms|Mammary Neoplasms|ovarian neoplasm|Ovarian Neoplasms	2	1.6	0.049	0.99
Blood Coagulation Factors	3	2.3	0.062	0.98
Head and Neck Neoplasms|Neoplasm Recurrence, Local|Neoplasms, Second Primary	4	3.1	0.076	0.98
Bladder Cancer	8	6.2	0.081	0.97

## Sheet: LCII Net Cytoscape
Gene	Degree	Betweenness Centrality	Closeness Centrality	Clustering Coefficient	MCODE Score			Pathway	Ratio of Proteins	Number of Proteins	Network proteins	P-Value	FDR	Nodes
ABCA3	1	0.0	0.27777778	0.0	0.0			MicroRNAs in cancer(K)	0.0265	299	5	0.0086216	0.1875	PRKCE,CDC25A,ZEB1,CDCA5,E2F1
ABCA9	3	0.0	0.33678756	1.0	3.0			Aldosterone synthesis and secretion(K)	0.0085	96	4	0.00075128	0.1557	PRKCE,ADCY4,NR4A2,KCNK3
ADCY4	12	0.03841835	0.42207792	0.57575758	7.0			Cushing syndrome(K)	0.0136	154	4	0.004159	0.1875	ADCY4,E2F1,PBX1,KCNK3
ALDH3B1	4	0.00369618	0.29147982	0.33333333	1.2			cGMP-PKG signaling pathway(K)	0.0144	163	4	0.0050771	0.1875	MEF2A,PRKCE,PDE5A,ADCY4
BMP5	3	0.0	0.34391534	1.0	3.0			Pathways in cancer(K)	0.0465	526	4	0.1836	0.245	RUNX1,ADCY4,E2F1,NFE2L2
C1QTNF7	15	0.02532127	0.43624161	0.56190476	8672727272727270			Cortisol synthesis and secretion(K)	0.0057	64	3	0.0025951	0.1557	ADCY4,PBX1,KCNK3
C2orf40	18	0.03301371	0.45138889	0.5620915	9487179487179480			Dilated cardiomyopathy (DCM)(K)	0.008	90	3	0.0066832	0.1875	SGCA,ADCY4,DES
CBLC	1	0.0	0.25096525	0.0	0.0			Inflammatory mediator regulation of TRP channels(K)	0.0088	99	3	0.0086625	0.1875	PRKCE,ADCY4,TRPV2
CDC25A	2	0.0	0.34574468	1.0	2.0			Parathyroid hormone synthesis, secretion and action(K)	0.0094	106	3	0.0104	0.1875	MEF2A,ADCY4,NR4A2
CDCA5	11	0.03154077	0.39634146	0.34545455	3238095238095230			Cell cycle(K)	0.011	124	3	0.0158	0.198	CHEK2,CDC25A,E2F1
CDCA7	4	0.00316582	0.32994924	0.66666667	3.0			Apelin signaling pathway(K)	0.0121	137	3	0.0205	0.2226	MEF2A,PRKCE,ADCY4
CHEK2	2	0.0	0.32019704	1.0	2.0			S Phase(R)	0.0138	156	3	0.0287	0.2283	CDC25A,CDCA5,E2F1
COL5A1	3	0.03076923	0.28508772	0.33333333	2.0			Cellular senescence(K)	0.0142	160	3	0.0306	0.2283	CHEK2,CDC25A,E2F1
CTHRC1	12	0.11248518	0.38922156	0.37878788	4464285714285710			Transcriptional misregulation in cancer(K)	0.0165	186	3	0.0445	0.2283	RUNX1,ZEB1,PBX1
CYP27A1	1	0.0	0.20833333	0.0	0.0			Human T-cell leukemia virus 1 infection(K)	0.0194	219	3	0.0661	0.245	CHEK2,ADCY4,E2F1
DES	16	0.00991704	0.44217687	0.71666667	9696969696969690			Cell Cycle Checkpoints(R)	0.0218	246	3	0.0866	0.245	CHEK2,NUF2,CDC25A
DOCK4	22	0.21776495	0.4887218	0.35930736	8590909090909090			LPA4-mediated signaling events(N)	0.0014	16	2	0.0021641	0.1557	PRKCE,ADCY4
DUOX1	9	0.06436004	0.38235294	0.30555556	1.92857e+16			phosphoinositides and their downstream targets(B)	0.0015	17	2	0.0024365	0.1557	GRASP,PRKCE
E2F1	2	0.0	0.16581633	1.0	2.0			Wnt signaling network(N)	0.0025	28	2	0.0064165	0.1875	RSPO1,CTHRC1
EBF1	3	0.0	0.35519126	1.0	3.0			ATM pathway(N)	0.003	34	2	0.0093096	0.1875	CHEK2,CDC25A
FAM83A	3	0.0	0.35911602	1.0	3.0			Fanconi Anemia Pathway(R)	0.0032	36	2	0.0104	0.1875	FANCG,UBE2T
FANCG	1	0.0	0.33163265	0.0	0.0			DAG and IP3 signaling(R)	0.0035	39	2	0.0121	0.198	PRKCE,ADCY4
FAR2	1	0.0	0.1653944	0.0	0.0			ABC transporters(K)	0.0039	44	2	0.0152	0.198	ABCA3,ABCA9
FCN3	22	0.0497637	0.48148148	0.55411255	9487179487179480			Validated transcriptional targets of deltaNp63 isoforms(N)	0.004	45	2	0.0158	0.198	RUNX1,COL5A1
FERMT1	2	0.03076923	0.33333333	0.0	0.6666666666666666			Fanconi anemia pathway(N)	0.004	45	2	0.0158	0.198	FANCG,UBE2T
FLRT3	1	0.0	0.27777778	0.0	0.0			Pre-NOTCH Expression and Processing(R)	0.0041	46	2	0.0165	0.198	RUNX1,E2F1
FOXF1	25	0.12696981	0.5	0.44333333	9487179487179480			Notch-mediated HES/HEY network(N)	0.0042	47	2	0.0172	0.2062	GATA6,E2F1
FOXF2	6	0.03076923	0.35714286	0.66666667	5.0			Fanconi anemia pathway(K)	0.0048	54	2	0.0223	0.2226	FANCG,UBE2T
FRMD4A	3	0.06057692	0.34946237	0.33333333	2.0			Endothelin signaling pathway(P)	0.0049	55	2	0.023	0.2283	PRKCE,ADCY4
GATA6	2	0.0	0.33505155	1.0	2.0			Endothelins(N)	0.0055	62	2	0.0287	0.2283	PRKCE,ADCY4
GRASP	2	0.0	0.33163265	1.0	2.0			LPA receptor mediated events(N)	0.0056	63	2	0.0296	0.2283	PRKCE,ADCY4
GREM1	3	0.00112179	0.28761062	0.66666667	1.66667e+16			E2F transcription factor network(N)	0.006	68	2	0.034	0.2283	CDC25A,E2F1
HOXA5	3	0.0	0.35519126	1.0	3.0			Arrhythmogenic right ventricular cardiomyopathy (ARVC)(K)	0.0064	72	2	0.0377	0.2283	SGCA,DES
IGSF10	20	0.04855127	0.4676259	0.54736842	9696969696969690			Validated targets of C-MYC transcriptional activation(N)	0.0067	76	2	0.0416	0.2283	CDC25A,CDCA7
KCNK3	14	0.01001944	0.42763158	0.69230769	9.0			Chronic myeloid leukemia(K)	0.0067	76	2	0.0416	0.2283	RUNX1,E2F1
KCNT2	23	0.05808288	0.45454545	0.45454545	9487179487179480			EGF receptor signaling pathway(P)	0.0073	82	2	0.0476	0.2382	CBLC,PRKCE
LOXL2	1	0.0	0.22260274	0.0	0.0			Hypertrophic cardiomyopathy (HCM)(K)	0.0073	83	2	0.0487	0.2434	SGCA,DES
LRRC32	7	0.00164772	0.38235294	0.71428571	5.0			Prostate cancer(K)	0.0086	97	2	0.0641	0.245	ZEB1,E2F1
MAMDC2	23	0.1560903	0.49242424	0.39130435	9487179487179480			Endocrine resistance(K)	0.0086	97	2	0.0641	0.245	ADCY4,E2F1
MEF2A	1	0.0	0.32994924	0.0	0.0			Progesterone-mediated oocyte maturation(K)	0.0088	99	2	0.0664	0.245	CDC25A,ADCY4
MND1	3	0.0	0.32663317	1.0	3.0			PDGFR-beta signaling pathway(N)	0.0106	120	2	0.0923	0.245	DOCK4,PRKCE
NFE2L2	4	0.09038462	0.19756839	0.16666667	2.0			Vascular smooth muscle contraction(K)	0.0107	121	2	0.0936	0.245	PRKCE,ADCY4
NFIL3	3	0.14615385	0.2398524	0.0	0.5			Mitotic G1-G1/S phases(R)	0.0119	134	2	0.111	0.245	CDC25A,E2F1
NOSTRIN	17	0.03420202	0.45774648	0.61029412	8590909090909090			Fluid shear stress and atherosclerosis(K)	0.0123	139	2	0.1179	0.245	MEF2A,NFE2L2
NPM3	7	0.00985573	0.40372671	0.61904762	3.42857e+16			Hepatocellular carcinoma(K)	0.0149	168	2	0.1597	0.245	E2F1,NFE2L2
NR4A2	2	0.17019231	0.29953917	0.0	0.6666666666666666			Mitotic Metaphase and Anaphase(R)	0.015	170	2	0.1627	0.245	NUF2,CDCA5
NUF2	5	0.00404723	0.33163265	0.6	2.7			Tight junction(K)	0.015	170	2	0.1627	0.245	PRKCE,RUNX1
NXF3	5	0.0	0.33854167	1.0	5.0			Influenza A(K)	0.0151	171	2	0.1642	0.245	TMPRSS4,NXF3
PAK6	2	0.0	0.31553398	1.0	2.0			Purine metabolism(K)	0.0154	174	2	0.1687	0.245	PDE5A,ADCY4
PBX1	1	0.0	0.26422764	0.0	0.0			Mitotic Prometaphase(R)	0.0155	175	2	0.1702	0.245	NUF2,CDCA5
PDE5A	21	0.04682472	0.44520548	0.49047619	9487179487179480			Mitotic G2-G2/M phases(R)	0.0157	177	2	0.1732	0.245	CDC25A,E2F1
PRKCE	14	0.01546754	0.42207792	0.61538462	6.10909e+16			Rap1 signaling pathway(K)	0.0182	206	2	0.2179	0.245	DOCK4,ADCY4
RHOJ	12	0.01522342	0.40123457	0.59090909	8.0			Human cytomegalovirus infection(K)	0.0199	225	2	0.2477	0.2477	ADCY4,E2F1
RPGR	1	0.0	0.19402985	0.0	0.0			PLK3 signaling events(N)	0.0004	5	1	0.021	0.2226	CHEK2
RSPO1	16	0.01570235	0.44217687	0.71666667	7628571428571420			sumoylation as a mechanism to modulate ctbp-dependent gene responses(B)	0.0006	7	1	0.0293	0.2283	ZEB1
RUNX1	1	0.0	0.3125	0.0	0.0			Neurotransmitter clearance(R)	0.0006	7	1	0.0293	0.2283	SLC6A4
SGCA	4	0.0	0.32828283	1.0	4.0			brca1 dependent ub ligase activity(B)	0.0007	8	1	0.0334	0.2283	FANCG
SLC6A4	15	0.01047891	0.4248366	0.68571429	9.0			Vitamin D metabolism and pathway(P)	0.0009	10	1	0.0416	0.2283	CYP27A1
SLCO2A1	8	0.00142081	0.37790698	0.82142857	6.0			cardiac protection against ros(B)	0.0009	10	1	0.0416	0.2283	PRKCE
STXBP6	22	0.07567651	0.45138889	0.48051948	7.71429e+16			protein kinase a at the centrosome(B)	0.001	11	1	0.0457	0.2283	PRKCE
TM6SF1	2	0.0	0.16581633	1.0	2.0			Amine-derived hormones(R)	0.001	11	1	0.0457	0.2283	DUOX1
TMPRSS4	3	0.0	0.36931818	1.0	3.0			5-Hydroxytryptamine degredation(P)	0.001	11	1	0.0457	0.2283	ALDH3B1
TRPV2	2	0.03076923	0.26209677	0.0	0.6666666666666666			oxidative stress induced gene expression via nrf2(B)	0.0012	13	1	0.0537	0.245	NFE2L2
UBE2T	18	0.12472703	0.45774648	0.32679739	7.0			Metabolism of nitric oxide(R)	0.0012	14	1	0.0578	0.245	NOSTRIN
WFDC1	7	0.00203968	0.36516854	0.80952381	4761904761904760			Primary bile acid biosynthesis(K)	0.0015	17	1	0.0697	0.245	CYP27A1
ZEB1	4	0.19519231	0.39393939	0.5	3.0			Phenylalanine metabolism(K)	0.0015	17	1	0.0697	0.245	ALDH3B1
								role of brca1 brca2 and atr in cancer susceptibility(B)	0.0018	20	1	0.0815	0.245	FANCG
								Effects of PIP2 hydrolysis(R)	0.002	23	1	0.0931	0.245	PRKCE
								Histidine metabolism(K)	0.002	23	1	0.0931	0.245	ALDH3B1
								Myogenesis(R)	0.0021	24	1	0.097	0.245	MEF2A
								alk in cardiac myocytes(B)	0.0021	24	1	0.097	0.245	BMP5
								G alpha (z) signalling events(R)	0.0021	24	1	0.097	0.245	ADCY4
								Vasopressin regulates renal water homeostasis via Aquaporins(R)	0.0023	26	1	0.1046	0.245	ADCY4
								Apoptosis signaling pathway(P)	0.0023	26	1	0.1046	0.245	PRKCE
								IL8- and CXCR1-mediated signaling events(N)	0.0025	28	1	0.1122	0.245	PRKCE
								BARD1 signaling events(N)	0.0026	29	1	0.116	0.245	FANCG
								Surfactant metabolism(R)	0.0026	29	1	0.116	0.245	GATA6
								Bile acid and bile salt metabolism(R)	0.0026	29	1	0.116	0.245	CYP27A1
								Striated Muscle Contraction(R)	0.0027	31	1	0.1235	0.245	DES
								beta-Alanine metabolism(K)	0.0027	31	1	0.1235	0.245	ALDH3B1
								Meiotic recombination(R)	0.0028	32	1	0.1272	0.245	MND1
								Noncanonical Wnt signaling pathway(N)	0.0028	32	1	0.1272	0.245	CTHRC1
								Oncogene Induced Senescence(R)	0.0029	33	1	0.1309	0.245	E2F1
								Signaling mediated by p38-alpha and p38-beta(N)	0.0031	35	1	0.1383	0.245	MEF2A
								IL2 signaling events mediated by PI3K(N)	0.0031	35	1	0.1383	0.245	E2F1
								Transcriptional regulation of pluripotent stem cells(R)	0.0032	36	1	0.142	0.245	PBX1
								Tyrosine metabolism(K)	0.0032	36	1	0.142	0.245	ALDH3B1
								ATR signaling pathway(N)	0.0033	37	1	0.1456	0.245	CDC25A
								Oxidative stress response(P)	0.0035	40	1	0.1565	0.245	MEF2A
								Aurora B signaling(N)	0.0035	40	1	0.1565	0.245	DES
								FOXA2 and FOXA3 transcription factor networks(N)	0.0036	41	1	0.1601	0.245	FOXF1
								FOXM1 transcription factor network(N)	0.0036	41	1	0.1601	0.245	CHEK2
								BMP receptor signaling(N)	0.0036	41	1	0.1601	0.245	GREM1
								Bladder cancer(K)	0.0036	41	1	0.1601	0.245	E2F1
								p53 pathway(P)	0.0039	44	1	0.1707	0.245	CHEK2
								Signaling by NOTCH3(R)	0.0039	44	1	0.1707	0.245	PBX1
								Integrin-linked kinase signaling(N)	0.004	45	1	0.1743	0.245	ZEB1
								agrin in postsynaptic differentiation(B)	0.004	45	1	0.1743	0.245	PAK6
								DNA Double Strand Break Response(R)	0.004	45	1	0.1743	0.245	CHEK2
								Transport of bile salts and organic acids, metal ions and amine compounds(R)	0.0041	46	1	0.1778	0.245	RUNX1
								Calcineurin-regulated NFAT-dependent transcription in lymphocytes(N)	0.0041	46	1	0.1778	0.245	E2F1
								Type II diabetes mellitus(K)	0.0041	46	1	0.1778	0.245	PRKCE
								keratinocyte differentiation(B)	0.0042	47	1	0.1813	0.245	PRKCE
								Ovarian steroidogenesis(K)	0.0043	49	1	0.1882	0.245	ADCY4
								Intrinsic Pathway for Apoptosis(R)	0.0043	49	1	0.1882	0.245	E2F1
								Signaling by FGFR1(R)	0.0043	49	1	0.1882	0.245	FLRT3
								Cholesterol metabolism(K)	0.0044	50	1	0.1917	0.245	CYP27A1
								Role of Calcineurin-dependent NFAT signaling in lymphocytes(N)	0.0046	52	1	0.1985	0.245	PRKCE
								IL2-mediated signaling events(N)	0.0048	54	1	0.2053	0.245	PRKCE
								Regulation of lipolysis in adipocytes(K)	0.0048	54	1	0.2053	0.245	ADCY4
								Thromboxane A2 receptor signaling(N)	0.0048	54	1	0.2053	0.245	PRKCE
								TCR signaling in naïve CD8+ T cells(N)	0.0048	54	1	0.2053	0.245	PRKCE
								p53 pathway(N)	0.005	57	1	0.2155	0.245	CHEK2
								Viral myocarditis(K)	0.0052	59	1	0.2221	0.245	SGCA
								Alzheimer disease-amyloid secretase pathway(P)	0.0052	59	1	0.2221	0.245	PRKCE
								Longevity regulating pathway - multiple species(K)	0.0055	62	1	0.232	0.245	ADCY4
								Platelet homeostasis(R)	0.0056	63	1	0.2353	0.245	PDE5A
								Regulation of retinoblastoma protein(N)	0.0057	64	1	0.2386	0.245	E2F1
								Sphingolipid metabolism(R)	0.0057	64	1	0.2386	0.245	ALDH3B1
								Downstream signaling in naïve CD8+ T cells(N)	0.0057	64	1	0.2386	0.245	PRKCE
								Mitophagy - animal(K)	0.0058	65	1	0.2418	0.245	E2F1
								Acute myeloid leukemia(K)	0.0058	66	1	0.245	0.245	RUNX1
								Oxidative Stress Induced Senescence(R)	0.0058	66	1	0.245	0.245	E2F1
								Activation of anterior HOX genes in hindbrain development during early embryogenesis(R)	0.0058	66	1	0.245	0.245	PBX1
								Non-small cell lung cancer(K)	0.0058	66	1	0.245	0.245	E2F1
								Beta1 integrin cell surface interactions(N)	0.0058	66	1	0.245	0.245	COL5A1
								Circadian Clock(R)	0.0059	67	1	0.2482	0.2482	NFIL3
								Interleukin-17 signaling(R)	0.0059	67	1	0.2482	0.2482	MEF2A
								TCR signaling in naïve CD4+ T cells(N)	0.0059	67	1	0.2482	0.2482	PRKCE
