# Supplementary material for: Identifying General Tumor and Specific Lung Cancer Biomarkers by Transcriptomic Analysis
Source: Biology (Basel). 2022 Jul 20;11(7):1082. doi: 10.3390/biology11071082 (PMC9313083; doi:10.3390/biology11071082)
Supplement: Supplementary file 1 [file biology-11-01082-s001.zip › SP5 CCPs LC_OC.xlsx]

## Sheet: CCPs BC
GENE
ABCA6
ACTG2
BIRC5
C1orf115
CAV1
CBX7
CCDC69
CD302
CDKN2A
CFD	2
DUSP1
EDNRB	4
EDNRB	2
EGR1	4
EPB41L2
FHL1	5
FOS
FOSB
GAS7
GIMAP6	2
GNG11	2
GRK5	1
HEG1
HLF
ITM2A
LMO2	2
LYVE1
MCM2
METTL7A
MMRN2	2
NR3C2
PCLAF
PLCL2
PLSCR4
SELP
SESN1
SLIT2
SNRK
STX7
SVEP1
TGFBR2
TGFBR3
TNXB
VEGFD

## Sheet: CCPs LK
GENES			Pathway	Ratio of Proteins	Number of Proteins	Network proteins	P-Value	FDR	Nodes
FOSB			TNF receptor signaling pathway(N)	0.0041	46	2	0.00045618	0.0538	CAV1,TNF
MCM2			IL-17 signaling pathway(K)	0.0082	93	2	0.0018338	0.0586	FOSB,TNF
CAV1			fosb gene expression and drug abuse(B)	0.0004	4	1	0.0028274	0.0586	FOSB
CD93			Osteoclast differentiation(K)	0.0113	128	2	0.003431	0.0586	FOSB,TNF
GIMAP6			Fluid shear stress and atherosclerosis(K)	0.0123	139	2	0.0040302	0.0586	CAV1,TNF
MCM2			Proteoglycans in cancer(K)	0.0178	201	2	0.0082438	0.0586	CAV1,TNF
ZFP36			Human T-cell leukemia virus 1 infection(K)	0.0194	219	2	0.009724	0.0586	ZFP36,TNF
PCLAF			Metabolism of nitric oxide(R)	0.0012	14	1	0.0098652	0.0586	CAV1
PRC1			Cellular roles of Anthrax toxin(N)	0.0017	19	1	0.0134	0.0586	TNF
EDNRB			Canonical Wnt signaling pathway(N)	0.0018	20	1	0.0141	0.0586	CAV1
LMO2			PDGFR-alpha signaling pathway(N)	0.0019	21	1	0.0148	0.0586	CAV1
TNF			Canonical NF-kappaB pathway(N)	0.002	23	1	0.0162	0.0586	TNF
SF12			IL27-mediated signaling events(N)	0.0023	26	1	0.0183	0.0586	TNF
			ALK1 signaling events(N)	0.0023	26	1	0.0183	0.0586	CAV1
			RXR and RAR heterodimerization with other nuclear receptor(N)	0.0023	26	1	0.0183	0.0586	TNF
			VEGFR1 specific signals(N)	0.0024	27	1	0.0189	0.0586	CAV1
			Triglyceride metabolism(R)	0.0025	28	1	0.0196	0.0586	CAV1
			amb2 Integrin signaling(N)	0.0027	31	1	0.0217	0.0586	TNF
			Asthma(K)	0.0027	31	1	0.0217	0.0586	TNF
			Antifolate resistance(K)	0.0027	31	1	0.0217	0.0586	TNF
			HIV-1 Nef: Negative effector of Fas and TNF-alpha(N)	0.0029	33	1	0.0231	0.0586	TNF
			African trypanosomiasis(K)	0.0031	35	1	0.0245	0.0586	TNF
			DNA replication(K)	0.0032	36	1	0.0252	0.0586	MCM2
			IL23-mediated signaling events(N)	0.0033	37	1	0.0259	0.0586	TNF
			ATR signaling pathway(N)	0.0033	37	1	0.0259	0.0586	MCM2
			TNF signaling(R)	0.0034	38	1	0.0266	0.0586	TNF
			Allograft rejection(K)	0.0034	38	1	0.0266	0.0586	TNF
			Graft-versus-host disease(K)	0.0036	41	1	0.0287	0.0586	TNF
			Type I diabetes mellitus(K)	0.0038	43	1	0.03	0.0586	TNF
			PLK1 signaling events(N)	0.0039	44	1	0.0307	0.0586	PRC1
			Interleukin-10 signaling(R)	0.004	45	1	0.0314	0.0586	TNF
			Insulin Pathway(N)	0.004	45	1	0.0314	0.0586	CAV1
			Calcineurin-regulated NFAT-dependent transcription in lymphocytes(N)	0.0041	46	1	0.0321	0.0586	TNF
			Type II diabetes mellitus(K)	0.0041	46	1	0.0321	0.0586	TNF
			TGF-beta receptor signaling(N)	0.0042	47	1	0.0328	0.0586	CAV1
			Ceramide signaling pathway(N)	0.0042	48	1	0.0335	0.0586	TNF
			Malaria(K)	0.0043	49	1	0.0342	0.0586	TNF
			Cocaine addiction(K)	0.0043	49	1	0.0342	0.0586	FOSB
			Angiopoietin receptor Tie2-mediated signaling(N)	0.0044	50	1	0.0348	0.0586	TNF
			Amyotrophic lateral sclerosis (ALS)(K)	0.0045	51	1	0.0355	0.0586	TNF
			Caspase cascade in apoptosis(N)	0.0046	52	1	0.0362	0.0586	TNF
			Signaling events mediated by PTP1B(N)	0.0046	52	1	0.0362	0.0586	CAV1
			Legionellosis(K)	0.0049	55	1	0.0383	0.0586	TNF
			Signaling events mediated by HDAC Class I(N)	0.005	56	1	0.039	0.0586	TNF
			Viral myocarditis(K)	0.0052	59	1	0.041	0.0586	CAV1
			Signaling events mediated by VEGFR1 and VEGFR2(N)	0.0056	63	1	0.0437	0.0586	CAV1
			Downstream signaling in naïve CD8+ T cells(N)	0.0057	64	1	0.0444	0.0586	TNF
			Inflammatory bowel disease (IBD)(K)	0.0058	65	1	0.0451	0.0586	TNF
			Fc epsilon RI signaling pathway(K)	0.006	68	1	0.0471	0.0586	TNF
			Amphetamine addiction(K)	0.006	68	1	0.0471	0.0586	FOSB
			Adipocytokine signaling pathway(K)	0.0061	69	1	0.0478	0.0586	TNF
			AP-1 transcription factor network(N)	0.0062	70	1	0.0485	0.0586	FOSB
			RIG-I-like receptor signaling pathway(K)	0.0062	70	1	0.0485	0.0586	TNF
			Leishmaniasis(K)	0.0065	74	1	0.0512	0.0586	TNF
			Bacterial invasion of epithelial cells(K)	0.0065	74	1	0.0512	0.0586	CAV1
			Pertussis(K)	0.0067	76	1	0.0525	0.0586	TNF
			Antigen processing and presentation(K)	0.0068	77	1	0.0532	0.0586	TNF
			Hypertrophic cardiomyopathy (HCM)(K)	0.0073	83	1	0.0573	0.0586	TNF
			Transcriptional regulation of white adipocyte differentiation(R)	0.0074	84	1	0.0579	0.0586	TNF
			DNA Replication Pre-Initiation(R)	0.0075	85	1	0.0586	0.0586	MCM2
			TGF-beta signaling pathway(K)	0.0075	85	1	0.0586	0.0586	TNF
			Regulation of mRNA stability by proteins that bind AU-rich elements(R)	0.0077	87	1	0.0599	0.0599	ZFP36
			Dilated cardiomyopathy (DCM)(K)	0.008	90	1	0.0619	0.0619	TNF
			Rheumatoid arthritis(K)	0.008	90	1	0.0619	0.0619	TNF
			Signaling by VEGF(R)	0.0083	94	1	0.0646	0.0646	CAV1
			NF-kappa B signaling pathway(K)	0.0084	95	1	0.0653	0.0653	TNF
			Amoebiasis(K)	0.0085	96	1	0.066	0.066	TNF
			Hematopoietic cell lineage(K)	0.0086	97	1	0.0666	0.0666	TNF
			ESR-mediated signaling(R)	0.0087	98	1	0.0673	0.0673	FOSB
			AGE-RAGE signaling pathway in diabetic complications(K)	0.0088	99	1	0.068	0.068	TNF
			ErbB1 downstream signaling(N)	0.0088	100	1	0.0686	0.0686	ZFP36
			T cell receptor signaling pathway(K)	0.0089	101	1	0.0693	0.0693	TNF
			TNFR2 non-canonical NF-kB pathway(R)	0.0089	101	1	0.0693	0.0693	TNF
			Chagas disease (American trypanosomiasis)(K)	0.009	102	1	0.0699	0.0699	TNF
			Toll-like receptor signaling pathway(K)	0.0092	104	1	0.0713	0.0713	TNF
			C-type lectin receptor signaling pathway(K)	0.0092	104	1	0.0713	0.0713	TNF
			Insulin resistance(K)	0.0095	107	1	0.0733	0.0733	TNF
			TNF signaling pathway(K)	0.0097	110	1	0.0752	0.0752	TNF
			Interleukin-4 and Interleukin-13 signaling(R)	0.0098	111	1	0.0759	0.0759	TNF
			Toxoplasmosis(K)	0.01	113	1	0.0772	0.0772	TNF
			Synthesis of DNA(R)	0.0104	117	1	0.0799	0.0799	MCM2
			Sphingolipid signaling pathway(K)	0.0104	118	1	0.0805	0.0805	TNF
			Cell cycle(K)	0.011	124	1	0.0845	0.0845	MCM2
			Natural killer cell mediated cytotoxicity(K)	0.0116	131	1	0.089	0.089	TNF
			Hepatitis C(K)	0.0116	131	1	0.089	0.089	TNF
			Systemic lupus erythematosus(K)	0.0118	133	1	0.0903	0.0903	TNF
			Mitotic G1-G1/S phases(R)	0.0119	134	1	0.091	0.091	MCM2
			Apoptosis(K)	0.012	136	1	0.0923	0.0923	TNF
			Direct p53 effectors(N)	0.012	136	1	0.0923	0.0923	CAV1
			Hepatitis B(K)	0.0127	144	1	0.0975	0.0975	TNF
			Non-alcoholic fatty liver disease (NAFLD)(K)	0.0132	149	1	0.1007	0.1007	TNF
			mTOR signaling pathway(K)	0.0134	151	1	0.102	0.102	TNF
			S Phase(R)	0.0138	156	1	0.1052	0.1052	MCM2
			Integrin signalling pathway(P)	0.014	158	1	0.1065	0.1065	CAV1
			TCF dependent signaling in response to WNT(R)	0.0142	160	1	0.1078	0.1078	CAV1
			Necroptosis(K)	0.0143	162	1	0.1091	0.1091	TNF
			NOD-like receptor signaling pathway(K)	0.0149	168	1	0.1129	0.1129	TNF
			Alzheimer disease(K)	0.0151	171	1	0.1148	0.1148	TNF
			Influenza A(K)	0.0151	171	1	0.1148	0.1148	TNF
			Tuberculosis(K)	0.0158	179	1	0.1199	0.1199	TNF
			Alcoholism(K)	0.0159	180	1	0.1205	0.1205	FOSB
			Herpes simplex infection(K)	0.0164	185	1	0.1237	0.1237	TNF
			Transcriptional misregulation in cancer(K)	0.0165	186	1	0.1243	0.1243	LMO2
			Kaposi sarcoma-associated herpesvirus infection(K)	0.0165	186	1	0.1243	0.1243	ZFP36
			RNA Polymerase II Transcription(R)	0.0783	885	2	0.1251	0.1251	CAV1,LMO2
			Focal adhesion(K)	0.0176	199	1	0.1325	0.1325	CAV1
			Epstein-Barr virus infection(K)	0.0178	201	1	0.1337	0.1337	TNF
			Cell surface interactions at the vascular wall(R)	0.0187	211	1	0.1399	0.1399	CAV1
			Human immunodeficiency virus 1 infection(K)	0.0188	212	1	0.1405	0.1405	TNF
			Human cytomegalovirus infection(K)	0.0199	225	1	0.1486	0.1486	TNF

## Sheet: Panth
		Gene ID	Mapped IDs	Gene Symbol	PANTHER Family/Subfamily	PANTHER Protein Class
	15.	HUMAN|HGNC=36|UniProtKB=Q8N139	ABCA6	ATP-binding cassette sub-family A member 6	ATP-BINDING CASSETTE SUB-FAMILY A MEMBER 6 (PTHR19229:SF13)	ATP-binding cassette (ABC) transporter
	40.	HUMAN|HGNC=145|UniProtKB=P63267	ACTG2	Actin, gamma-enteric smooth muscle	ACTIN, GAMMA-ENTERIC SMOOTH MUSCLE (PTHR11937:SF227)	actin and actin related protein
	21.	HUMAN|HGNC=593|UniProtKB=O15392	BIRC5	Baculoviral IAP repeat-containing protein 5	BACULOVIRAL IAP REPEAT-CONTAINING PROTEIN 5 (PTHR10044:SF166)	protease inhibitor
	25.	HUMAN|HGNC=25873|UniProtKB=Q9H7X2	C1orf115	Uncharacterized protein C1orf115	CHROMOSOME 1 OPEN READING FRAME 115 (PTHR14680:SF1)	-
	44.	HUMAN|HGNC=1527|UniProtKB=Q03135	CAV1	Caveolin-1	CAVEOLIN-1 (PTHR10844:SF18)	G-protein modulator, membrane traffic protein, structural protein, transmembrane receptor regulatory/adaptor protein
	17.	HUMAN|HGNC=1557|UniProtKB=O95931	CBX7	Chromobox protein homolog 7	CHROMOBOX PROTEIN HOMOLOG 7 (PTHR47277:SF1)	-
	8.	HUMAN|HGNC=24487|UniProtKB=A6NI79	CCDC69	Coiled-coil domain-containing protein 69	COILED-COIL DOMAIN-CONTAINING PROTEIN 69 (PTHR24200:SF6)	-
	37.	HUMAN|HGNC=30843|UniProtKB=Q8IX05	CD302	CD302 antigen	CD302 ANTIGEN (PTHR22803:SF128)	-
	13.	HUMAN|HGNC=1787|UniProtKB=P42771	CDKN2A	Cyclin-dependent kinase inhibitor 2A	-	-
	3.	HUMAN|HGNC=2771|UniProtKB=P00746	CFD	Complement factor D	COMPLEMENT FACTOR D (PTHR24271:SF54)	serine protease
	7.	HUMAN|HGNC=3064|UniProtKB=P28562	DUSP1	Dual specificity protein phosphatase 1	DUAL SPECIFICITY PROTEIN PHOSPHATASE 1 (PTHR10159:SF309)	-
	26.	HUMAN|HGNC=3180|UniProtKB=P24530	EDNRB	Endothelin receptor type B	ENDOTHELIN RECEPTOR TYPE B (PTHR46099:SF3)	-
	24.	HUMAN|HGNC=3238|UniProtKB=P18146	EGR1	Early growth response protein 1	EARLY GROWTH RESPONSE PROTEIN 1 (PTHR23235:SF42)	DNA binding protein, transcription cofactor, zinc finger transcription factor
	32.	HUMAN|HGNC=3379|UniProtKB=O43491	EPB41L2	Band 4.1-like protein 2	BAND 4.1-LIKE PROTEIN 2 (PTHR23280:SF17)	-
	4.	HUMAN|HGNC=3702|UniProtKB=Q13642	FHL1	Four and a half LIM domains protein 1	FOUR AND A HALF LIM DOMAINS PROTEIN 1 (PTHR47029:SF2)	-
	14.	HUMAN|HGNC=3796|UniProtKB=P01100	FOS	Proto-oncogene c-Fos	PROTO-ONCOGENE C-FOS (PTHR23351:SF4)	basic leucine zipper transcription factor
	2.	HUMAN|HGNC=3797|UniProtKB=P53539	FOSB	Protein fosB	PROTEIN FOSB (PTHR23351:SF3)	basic leucine zipper transcription factor
	28.	HUMAN|HGNC=4169|UniProtKB=O60861	GAS7	Growth arrest-specific protein 7	GROWTH ARREST-SPECIFIC PROTEIN 7 (PTHR23065:SF7)	-
	34.	HUMAN|HGNC=21918|UniProtKB=Q6P9H5	GIMAP6	GTPase IMAP family member 6	GTPASE IMAP FAMILY MEMBER 6 (PTHR10903:SF61)	-
	41.	HUMAN|HGNC=4403|UniProtKB=P61952	GNG11	Guanine nucleotide-binding protein G(I)/G(S)/G(O) subunit gamma-11	GUANINE NUCLEOTIDE-BINDING PROTEIN G(I)/G(S)/G(O) SUBUNIT GAMMA-11 (PTHR13809:SF1)	heterotrimeric G-protein
	22.	HUMAN|HGNC=4544|UniProtKB=P34947	GRK5	G protein-coupled receptor kinase 5	G PROTEIN-COUPLED RECEPTOR KINASE 5 (PTHR24355:SF27)	non-receptor serine/threonine protein kinase
	23.	HUMAN|HGNC=29227|UniProtKB=Q9ULI3	HEG1	Protein HEG homolog 1	PROTEIN HEG HOMOLOG 1 (PTHR24037:SF3)	-
	35.	HUMAN|HGNC=3374|UniProtKB=Q99814	HLF	Endothelial PAS domain-containing protein 1	ENDOTHELIAL PAS DOMAIN-CONTAINING PROTEIN 1 (PTHR23043:SF8)	basic helix-loop-helix transcription factor, nucleic acid binding
	39.	HUMAN|HGNC=6173|UniProtKB=O43736	ITM2A	Integral membrane protein 2A	INTEGRAL MEMBRANE PROTEIN 2A (PTHR10962:SF7)	-
	11.	HUMAN|HGNC=6642|UniProtKB=P25791	LMO2	Rhombotin-2	RHOMBOTIN-2 (PTHR45787:SF3)	-
	20.	HUMAN|HGNC=14687|UniProtKB=Q9Y5Y7	LYVE1	Lymphatic vessel endothelial hyaluronic acid receptor 1	LYMPHATIC VESSEL ENDOTHELIAL HYALURONIC ACID RECEPTOR 1 (PTHR10225:SF2)	-
	5.	HUMAN|HGNC=6944|UniProtKB=P49736	MCM2	DNA replication licensing factor MCM2	DNA REPLICATION LICENSING FACTOR MCM2 (PTHR11630:SF44)	DNA helicase, hydrolase
	36.	HUMAN|HGNC=24550|UniProtKB=Q9H8H3	METTL7A	Methyltransferase-like protein 7A	METHYLTRANSFERASE-LIKE PROTEIN 7A (PTHR42912:SF21)	methyltransferase
	18.	HUMAN|HGNC=19888|UniProtKB=Q9H8L6	MMRN2	Multimerin-2	MULTIMERIN-2 (PTHR15427:SF6)	-
	31.	HUMAN|HGNC=7979|UniProtKB=P08235	NR3C2	Mineralocorticoid receptor	MINERALOCORTICOID RECEPTOR (PTHR24084:SF22)	C4 zinc finger nuclear receptor, nucleic acid binding, receptor
	42.	HUMAN|HGNC=28961|UniProtKB=Q15004	PCLAF	PCNA-associated factor	PCNA-ASSOCIATED FACTOR (PTHR15679:SF8)	-
	6.	HUMAN|HGNC=9064|UniProtKB=Q9UPR0	PLCL2	Inactive phospholipase C-like protein 2	INACTIVE PHOSPHOLIPASE C-LIKE PROTEIN 2 (PTHR10336:SF84)	calcium-binding protein, guanyl-nucleotide exchange factor,phospholipase, signaling molecule
	29.	HUMAN|HGNC=16497|UniProtKB=Q9NRQ2	PLSCR4	Phospholipid scramblase 4	PHOSPHOLIPID SCRAMBLASE 4 (PTHR23248:SF28)	transfer/carrier protein
	10.	HUMAN|HGNC=10721|UniProtKB=P16109	SELP	P-selectin	P-SELECTIN (PTHR19325:SF484)	-
	33.	HUMAN|HGNC=21595|UniProtKB=Q9Y6P5	SESN1	Sestrin-1	SESTRIN-1 (PTHR12474:SF3)	peroxidase
	38.	HUMAN|HGNC=11086|UniProtKB=O94813	SLIT2	Slit homolog 2 protein	SLIT HOMOLOG 2 PROTEIN (PTHR45836:SF2)	-
	27.	HUMAN|HGNC=30598|UniProtKB=Q9NRH2	SNRK	SNF-related serine/threonine-protein kinase	SNF-RELATED SERINE/THREONINE-PROTEIN KINASE (PTHR24343:SF181)	non-receptor serine/threonine protein kinase
	12.	HUMAN|HGNC=11442|UniProtKB=O15400	STX7	Syntaxin-7	SYNTAXIN-7 (PTHR19957:SF90)	SNARE protein
	43.	HUMAN|HGNC=11773|UniProtKB=P37173	TGFBR2	TGF-beta receptor type-2	TGF-BETA RECEPTOR TYPE-2 (PTHR23255:SF55)	TGF-beta receptor, serine/threonine protein kinase receptor
	9.	HUMAN|HGNC=11774|UniProtKB=Q03167	TGFBR3	Transforming growth factor beta receptor type 3	TRANSFORMING GROWTH FACTOR BETA RECEPTOR TYPE 3 (PTHR14002:SF7)	-
	16.	HUMAN|HGNC=11976|UniProtKB=P22105	TNXB	Tenascin-X	TENASCIN-X-RELATED (PTHR46708:SF3)	-
	1.	HUMAN|HGNC=3708|UniProtKB=O43915	VEGFD	Vascular endothelial growth factor D	VASCULAR ENDOTHELIAL GROWTH FACTOR D (PTHR12025:SF11)	growth factor

## Sheet: Reactome
Pathway	Ratio of Proteins	Number of Proteins	Network proteins	P-Value	FDR	Nodes
Pathways in cancer(K)	0.0465	526	7	0.00023511	0.012	EDNRB,CDKN2A,VEGFD,FOS,GNG11,TGFBR2,BIRC5
RNA Polymerase II Transcription(R)	0.0783	885	7	0.0049048	0.0687	NR3C2,SESN1,CDKN2A,CAV1,LMO2,FOS,BIRC5
AP-1 transcription factor network(N)	0.0062	70	5	7.9469e-07	0.00020265	EGR1,DUSP1,CDKN2A,FOS,FOSB
Relaxin signaling pathway(K)	0.0115	130	5	1.5854e-05	0.0020134	EDNRB,VEGFD,FOS,GNG11,TGFBR2
Human T-cell leukemia virus 1 infection(K)	0.0194	219	4	0.0019885	0.0418	EGR1,CDKN2A,FOS,TGFBR2
MAPK signaling pathway(K)	0.0261	295	4	0.0057546	0.07	DUSP1,VEGFD,FOS,TGFBR2
FOXM1 transcription factor network(N)	0.0036	41	3	0.00014605	0.012	CDKN2A,FOS,BIRC5
TGF-beta receptor signaling(N)	0.0042	47	3	0.00021783	0.012	CAV1,TGFBR2,TGFBR3
Colorectal cancer(K)	0.0076	86	3	0.0012511	0.0418	FOS,TGFBR2,BIRC5
AGE-RAGE signaling pathway in diabetic complications(K)	0.0088	99	3	0.001868	0.0418	EGR1,VEGFD,TGFBR2
ErbB1 downstream signaling(N)	0.0088	100	3	0.001922	0.0418	EGR1,DUSP1,FOS
Response to elevated platelet cytosolic Ca2+(R)	0.01	113	3	0.0027144	0.0516	CFD,VEGFD,SELP
Osteoclast differentiation(K)	0.0113	128	3	0.0038488	0.0654	FOS,TGFBR2,FOSB
Direct p53 effectors(N)	0.012	136	3	0.004556	0.0683	SESN1,DUSP1,CAV1
Fluid shear stress and atherosclerosis(K)	0.0123	139	3	0.0048402	0.0687	DUSP1,CAV1,FOS
SUMOylation(R)	0.0155	175	3	0.009103	0.0901	NR3C2,CDKN2A,BIRC5
Focal adhesion(K)	0.0176	199	3	0.0129	0.0901	TNXB,CAV1,VEGFD
Endocytosis(K)	0.0216	244	3	0.022	0.0945	GRK5,CAV1,TGFBR2
Cell Cycle Checkpoints(R)	0.0218	246	3	0.0225	0.0945	CDKN2A,BIRC5,MCM2
PI3K-Akt signaling pathway(K)	0.0313	354	3	0.0562	0.0945	TNXB,VEGFD,GNG11
PDGFR-alpha signaling pathway(N)	0.0019	21	2	0.0012633	0.0418	CAV1,FOS
Glypican 1 network(N)	0.0022	25	2	0.0017794	0.0418	SLIT2,TGFBR2
ALK1 signaling events(N)	0.0023	26	2	0.0019217	0.0418	CAV1,TGFBR2
Trk receptor signaling mediated by the MAPK pathway(N)	0.0029	33	2	0.0030628	0.0551	EGR1,FOS
Calcineurin-regulated NFAT-dependent transcription in lymphocytes(N)	0.0041	46	2	0.0058344	0.07	EGR1,FOS
Senescence-Associated Secretory Phenotype (SASP)(R)	0.0046	52	2	0.0073879	0.0887	CDKN2A,FOS
Staphylococcus aureus infection(K)	0.005	56	2	0.0085162	0.0901	CFD,SELP
ATF-2 transcription factor network(N)	0.0051	58	2	0.0091076	0.0901	DUSP1,FOS
Fc-epsilon receptor I signaling in mast cells(N)	0.0055	62	2	0.0103	0.0901	DUSP1,FOS
Endothelins(N)	0.0055	62	2	0.0103	0.0901	EDNRB,FOS
Downstream signaling in naïve CD8+ T cells(N)	0.0057	64	2	0.011	0.0901	EGR1,FOS
Oxidative Stress Induced Senescence(R)	0.0058	66	2	0.0117	0.0901	CDKN2A,FOS
Angiogenesis(P)	0.0058	66	2	0.0117	0.0901	FOS,BIRC5
Amphetamine addiction(K)	0.006	68	2	0.0123	0.0901	FOS,FOSB
p53 signaling pathway(K)	0.0064	72	2	0.0137	0.0945	SESN1,CDKN2A
Platinum drug resistance(K)	0.0065	73	2	0.0141	0.0945	CDKN2A,BIRC5
Pancreatic cancer(K)	0.0066	75	2	0.0148	0.0945	CDKN2A,TGFBR2
Chronic myeloid leukemia(K)	0.0067	76	2	0.0152	0.0945	CDKN2A,TGFBR2
Glucocorticoid receptor regulatory network(N)	0.0069	78	2	0.016	0.0945	EGR1,FOS
Morphine addiction(K)	0.0081	91	2	0.0213	0.0945	GRK5,GNG11
IL-17 signaling pathway(K)	0.0082	93	2	0.0222	0.0945	FOS,FOSB
Signaling by VEGF(R)	0.0083	94	2	0.0226	0.0945	CAV1,VEGFD
Circadian entrainment(K)	0.0085	96	2	0.0236	0.0945	FOS,GNG11
Endocrine resistance(K)	0.0086	97	2	0.024	0.0945	CDKN2A,FOS
ESR-mediated signaling(R)	0.0087	98	2	0.0245	0.0945	FOS,FOSB
Chagas disease (American trypanosomiasis)(K)	0.009	102	2	0.0263	0.0945	FOS,TGFBR2
Parathyroid hormone synthesis, secretion and action(K)	0.0094	106	2	0.0283	0.0945	EGR1,FOS
Th17 cell differentiation(K)	0.0095	107	2	0.0288	0.0945	FOS,TGFBR2
Interleukin-4 and Interleukin-13 signaling(R)	0.0098	111	2	0.0308	0.0945	FOS,BIRC5
Cholinergic synapse(K)	0.0099	112	2	0.0313	0.0945	FOS,GNG11
Serotonergic synapse(K)	0.0101	114	2	0.0323	0.0945	DUSP1,GNG11
Huntington disease(P)	0.0107	121	2	0.036	0.0945	ACTG2,FOS
Cell cycle(K)	0.011	124	2	0.0377	0.0945	CDKN2A,MCM2
Dopaminergic synapse(K)	0.0116	131	2	0.0416	0.0945	FOS,GNG11
Mitotic G1-G1/S phases(R)	0.0119	134	2	0.0433	0.0945	CDKN2A,MCM2
Apoptosis(K)	0.012	136	2	0.0445	0.0945	FOS,BIRC5
Apelin signaling pathway(K)	0.0121	137	2	0.0451	0.0945	EGR1,GNG11
Hepatitis B(K)	0.0127	144	2	0.0493	0.0945	FOS,BIRC5
Hippo signaling pathway(K)	0.0136	154	2	0.0555	0.0945	TGFBR2,BIRC5
Cellular senescence(K)	0.0142	160	2	0.0594	0.0945	CDKN2A,TGFBR2
Hepatocellular carcinoma(K)	0.0149	168	2	0.0647	0.0945	CDKN2A,TGFBR2
Alcoholism(K)	0.0159	180	2	0.073	0.0945	GNG11,FOSB
Transcriptional misregulation in cancer(K)	0.0165	186	2	0.0772	0.0945	LMO2,TGFBR2
Kaposi sarcoma-associated herpesvirus infection(K)	0.0165	186	2	0.0772	0.0945	FOS,GNG11
Chemokine signaling pathway(K)	0.0167	189	2	0.0794	0.0945	GRK5,GNG11
G alpha (q) signalling events(R)	0.0173	196	2	0.0845	0.0945	EDNRB,GRK5
Cell surface interactions at the vascular wall(R)	0.0187	211	2	0.0957	0.0957	CAV1,SELP
Human immunodeficiency virus 1 infection(K)	0.0188	212	2	0.0965	0.0965	FOS,GNG11
Human cytomegalovirus infection(K)	0.0199	225	2	0.1066	0.1066	CDKN2A,GNG11
Ras signaling pathway(K)	0.0205	232	2	0.1122	0.1122	VEGFD,GNG11
MicroRNAs in cancer(K)	0.0265	299	2	0.1688	0.1688	TNXB,CDKN2A
fosb gene expression and drug abuse(B)	0.0004	4	1	0.0098608	0.0901	FOSB
tsp-1 induced apoptosis in microvascular endothelial cell(B)	0.0007	8	1	0.0196	0.0945	FOS
pertussis toxin-insensitive ccr5 signaling in macrophage(B)	0.0007	8	1	0.0196	0.0945	FOS
VEGF and VEGFR signaling network(N)	0.0009	10	1	0.0245	0.0945	VEGFD
repression of pain sensation by the transcriptional regulator dream(B)	0.0011	12	1	0.0293	0.0945	FOS
oxidative stress induced gene expression via nrf2(B)	0.0012	13	1	0.0317	0.0945	FOS
il 3 signaling pathway(B)	0.0012	13	1	0.0317	0.0945	FOS
b cell survival pathway(B)	0.0012	13	1	0.0317	0.0945	BIRC5
cadmium induces dna synthesis and proliferation in macrophages(B)	0.0012	13	1	0.0317	0.0945	FOS
Metabolism of nitric oxide(R)	0.0012	14	1	0.0341	0.0945	CAV1
Ras signaling in the CD4+ TCR pathway(N)	0.0012	14	1	0.0341	0.0945	FOS
calcium signaling by hbx of hepatitis b virus(B)	0.0013	15	1	0.0365	0.0945	FOS
bone remodeling(B)	0.0014	16	1	0.0389	0.0945	FOS
nerve growth factor pathway (ngf)(B)	0.0014	16	1	0.0389	0.0945	FOS
mets affect on macrophage differentiation(B)	0.0016	18	1	0.0436	0.0945	FOS
cyclins and cell cycle regulation(B)	0.0017	19	1	0.046	0.0945	CDKN2A
tumor suppressor arf inhibits ribosomal biogenesis(B)	0.0017	19	1	0.046	0.0945	CDKN2A
Hypoxic and oxygen homeostasis regulation of HIF-1-alpha(N)	0.0017	19	1	0.046	0.0945	CDKN2A
Canonical Wnt signaling pathway(N)	0.0018	20	1	0.0484	0.0945	CAV1
cell cycle: g1/s check point(B)	0.0019	21	1	0.0507	0.0945	CDKN2A
igf-1 signaling pathway(B)	0.0019	21	1	0.0507	0.0945	FOS
ctcf: first multivalent nuclear factor(B)	0.0019	22	1	0.0531	0.0945	CDKN2A
inhibition of cellular proliferation by gleevec(B)	0.0019	22	1	0.0531	0.0945	FOS
Nicotinic acetylcholine receptor signaling pathway(P)	0.0019	22	1	0.0531	0.0945	ACTG2
Signaling events mediated by PRL(N)	0.002	23	1	0.0554	0.0945	EGR1
VEGFR3 signaling in lymphatic endothelium(N)	0.0022	25	1	0.0601	0.0945	VEGFD
C-MYC pathway(N)	0.0022	25	1	0.0601	0.0945	CDKN2A
fc epsilon receptor i signaling in mast cells(B)	0.0022	25	1	0.0601	0.0945	FOS
Alpha9 beta1 integrin signaling events(N)	0.0022	25	1	0.0601	0.0945	VEGFD
tpo signaling pathway(B)	0.0022	25	1	0.0601	0.0945	FOS
Nongenotropic Androgen signaling(N)	0.0022	25	1	0.0601	0.0945	FOS
S1P2 pathway(N)	0.0023	26	1	0.0624	0.0945	FOS
bcr signaling pathway(B)	0.0023	26	1	0.0624	0.0945	FOS
5HT2 type receptor mediated signaling pathway(P)	0.0023	26	1	0.0624	0.0945	GNG11
pdgf signaling pathway(B)	0.0023	26	1	0.0624	0.0945	FOS
Calcium signaling in the CD4+ TCR pathway(N)	0.0024	27	1	0.0648	0.0945	FOS
VEGFR1 specific signals(N)	0.0024	27	1	0.0648	0.0945	CAV1
Triglyceride metabolism(R)	0.0025	28	1	0.0671	0.0945	CAV1
Osteopontin-mediated events(N)	0.0026	29	1	0.0694	0.0945	FOS
Alpha-synuclein signaling(N)	0.0027	30	1	0.0717	0.0945	GRK5
IL12 signaling mediated by STAT4(N)	0.0027	31	1	0.074	0.0945	FOS
role of egf receptor transactivation by gpcrs in cardiac hypertrophy(B)	0.0027	31	1	0.074	0.0945	FOS
Regulation of p38-alpha and p38-beta(N)	0.0027	31	1	0.074	0.0945	DUSP1
Aurora A signaling(N)	0.0027	31	1	0.074	0.0945	BIRC5
amb2 Integrin signaling(N)	0.0027	31	1	0.074	0.0945	SELP
toll-like receptor pathway(B)	0.0028	32	1	0.0763	0.0945	FOS
angiotensin ii mediated activation of jnk pathway via pyk2 dependent signaling(B)	0.0029	33	1	0.0786	0.0945	FOS
Oncogene Induced Senescence(R)	0.0029	33	1	0.0786	0.0945	CDKN2A
Apoptosis - multiple species(K)	0.0029	33	1	0.0786	0.0945	BIRC5
SNARE interactions in vesicular transport(K)	0.003	34	1	0.0809	0.0945	STX7
HSP90 chaperone cycle for steroid hormone receptors (SHR)(R)	0.003	34	1	0.0809	0.0945	NR3C2
Prion diseases(K)	0.0031	35	1	0.0832	0.0945	EGR1
signal transduction through il1r(B)	0.0031	35	1	0.0832	0.0945	FOS
Trk receptor signaling mediated by PI3K and PLC-gamma(N)	0.0032	36	1	0.0854	0.0945	EGR1
DNA replication(K)	0.0032	36	1	0.0854	0.0945	MCM2
Aldosterone-regulated sodium reabsorption(K)	0.0033	37	1	0.0877	0.0945	NR3C2
ATR signaling pathway(N)	0.0033	37	1	0.0877	0.0945	MCM2
Validated transcriptional targets of AP1 family members Fra1 and Fra2(N)	0.0033	37	1	0.0877	0.0945	CDKN2A
GMCSF-mediated signaling events(N)	0.0033	37	1	0.0877	0.0945	FOS
ErbB2/ErbB3 signaling events(N)	0.0033	37	1	0.0877	0.0945	FOS
Smooth Muscle Contraction(R)	0.0034	38	1	0.09	0.0945	ACTG2
Oxidative stress response(P)	0.0035	40	1	0.0945	0.0945	DUSP1
Aurora B signaling(N)	0.0035	40	1	0.0945	0.0945	BIRC5
Bladder cancer(K)	0.0036	41	1	0.0967	0.0967	CDKN2A
FOXA1 transcription factor network(N)	0.0037	42	1	0.099	0.099	FOS
Beta3 integrin cell surface interactions(N)	0.0038	43	1	0.1012	0.1012	TGFBR2
il-2 receptor beta chain in t cell activation(B)	0.0039	44	1	0.1034	0.1034	FOS
DNA Damage Bypass(R)	0.004	45	1	0.1057	0.1057	PCLAF
RhoA signaling pathway(N)	0.004	45	1	0.1057	0.1057	FOS
Validated transcriptional targets of deltaNp63 isoforms(N)	0.004	45	1	0.1057	0.1057	CDKN2A
Presenilin action in Notch and Wnt signaling(N)	0.004	45	1	0.1057	0.1057	FOS
Insulin Pathway(N)	0.004	45	1	0.1057	0.1057	CAV1
TNF receptor signaling pathway(N)	0.0041	46	1	0.1079	0.1079	CAV1
FGF signaling pathway(N)	0.0042	47	1	0.1101	0.1101	FOS
keratinocyte differentiation(B)	0.0042	47	1	0.1101	0.1101	FOS
IL6-mediated signaling events(N)	0.0042	47	1	0.1101	0.1101	FOS
Integrins in angiogenesis(N)	0.0042	47	1	0.1101	0.1101	TGFBR2
t cell receptor signaling pathway(B)	0.0042	48	1	0.1123	0.1123	FOS
Netrin-1 signaling(R)	0.0043	49	1	0.1145	0.1145	SLIT2
Malaria(K)	0.0043	49	1	0.1145	0.1145	SELP
Cocaine addiction(K)	0.0043	49	1	0.1145	0.1145	FOSB
Regulation of Androgen receptor activity(N)	0.0044	50	1	0.1167	0.1167	EGR1
Validated transcriptional targets of TAp63 isoforms(N)	0.0044	50	1	0.1167	0.1167	CDKN2A
Neurexins and neuroligins(R)	0.0044	50	1	0.1167	0.1167	EPB41L2
Signaling events mediated by PTP1B(N)	0.0046	52	1	0.1211	0.1211	CAV1
mapkinase signaling pathway(B)	0.0047	53	1	0.1233	0.1233	FOS
IL2-mediated signaling events(N)	0.0048	54	1	0.1255	0.1255	FOS
Interleukin signaling pathway(P)	0.0049	55	1	0.1277	0.1277	FOS
Endothelin signaling pathway(P)	0.0049	55	1	0.1277	0.1277	EDNRB
p53 pathway(N)	0.005	57	1	0.132	0.132	CDKN2A
B cell activation(P)	0.0052	59	1	0.1363	0.1363	FOS
Viral myocarditis(K)	0.0052	59	1	0.1363	0.1363	CAV1
Coregulation of Androgen receptor activity(N)	0.0053	60	1	0.1384	0.1384	CDKN2A
Parkinson disease(P)	0.0054	61	1	0.1406	0.1406	STX7
IL12-mediated signaling events(N)	0.0054	61	1	0.1406	0.1406	FOS
Signaling events mediated by VEGFR1 and VEGFR2(N)	0.0056	63	1	0.1449	0.1449	CAV1
LPA receptor mediated events(N)	0.0056	63	1	0.1449	0.1449	FOS
IL4-mediated signaling events(N)	0.0057	64	1	0.147	0.147	SELP
Regulation of retinoblastoma protein(N)	0.0057	64	1	0.147	0.147	CDKN2A
HIF-1-alpha transcription factor network(N)	0.0058	65	1	0.1491	0.1491	FOS
BCR signaling pathway(N)	0.0058	65	1	0.1491	0.1491	FOS
Non-small cell lung cancer(K)	0.0058	66	1	0.1512	0.1512	CDKN2A
Interleukin-17 signaling(R)	0.0059	67	1	0.1533	0.1533	FOS
Interferon alpha/beta signaling(R)	0.006	68	1	0.1554	0.1554	EGR1
E2F transcription factor network(N)	0.006	68	1	0.1554	0.1554	CDKN2A
Regulation of Telomerase(N)	0.006	68	1	0.1554	0.1554	FOS
Prolactin signaling pathway(K)	0.0062	70	1	0.1596	0.1596	FOS
Glioma(K)	0.0063	71	1	0.1617	0.1617	CDKN2A
B cell receptor signaling pathway(K)	0.0063	71	1	0.1617	0.1617	FOS
Adherens junction(K)	0.0064	72	1	0.1638	0.1638	TGFBR2
Melanoma(K)	0.0064	72	1	0.1638	0.1638	CDKN2A
Inflammation mediated by chemokine and cytokine signaling pathway(P)	0.0064	72	1	0.1638	0.1638	PLCL2
Signaling by TGF-beta Receptor Complex(R)	0.0065	73	1	0.1659	0.1659	TGFBR2
Leishmaniasis(K)	0.0065	74	1	0.168	0.168	FOS
Bacterial invasion of epithelial cells(K)	0.0065	74	1	0.168	0.168	CAV1
Validated targets of C-MYC transcriptional activation(N)	0.0067	76	1	0.1721	0.1721	BIRC5
Pertussis(K)	0.0067	76	1	0.1721	0.1721	FOS
Regulation of nuclear SMAD2/3 signaling(N)	0.0068	77	1	0.1742	0.1742	FOS
Complement and coagulation cascades(K)	0.007	79	1	0.1783	0.1783	CFD
TGF-beta signaling pathway(P)	0.0071	80	1	0.1803	0.1803	TGFBR2
Signaling events mediated by Hepatocyte Growth Factor Receptor (c-Met)(N)	0.0071	80	1	0.1803	0.1803	EGR1
Regulation of nuclear beta catenin signaling and target gene transcription(N)	0.0071	80	1	0.1803	0.1803	CDKN2A
T cell activation(P)	0.0072	81	1	0.1824	0.1824	FOS
ECM-receptor interaction(K)	0.0073	82	1	0.1844	0.1844	TNXB
C-MYB transcription factor network(N)	0.0073	82	1	0.1844	0.1844	CDKN2A
TGF-beta signaling pathway(K)	0.0075	85	1	0.1905	0.1905	TGFBR2
DNA Replication Pre-Initiation(R)	0.0075	85	1	0.1905	0.1905	MCM2
Salmonella infection(K)	0.0076	86	1	0.1925	0.1925	FOS
GABAergic synapse(K)	0.0078	88	1	0.1965	0.1965	GNG11
Longevity regulating pathway(K)	0.0079	89	1	0.1985	0.1985	SESN1
Rheumatoid arthritis(K)	0.008	90	1	0.2005	0.2005	FOS
Integration of energy metabolism(R)	0.0081	91	1	0.2025	0.2025	GNG11
Th1 and Th2 cell differentiation(K)	0.0081	92	1	0.2045	0.2045	FOS
GnRH signaling pathway(K)	0.0082	93	1	0.2065	0.2065	EGR1
Choline metabolism in cancer(K)	0.0088	99	1	0.2183	0.2183	FOS
Melanogenesis(K)	0.0089	101	1	0.2222	0.2222	EDNRB
T cell receptor signaling pathway(K)	0.0089	101	1	0.2222	0.2222	FOS
Toll-like receptor signaling pathway(K)	0.0092	104	1	0.228	0.228	FOS
Glycosaminoglycan metabolism(R)	0.0095	107	1	0.2338	0.2338	LYVE1
TNF signaling pathway(K)	0.0097	110	1	0.2395	0.2395	FOS
Alzheimer disease-presenilin pathway(P)	0.0098	111	1	0.2414	0.2414	ACTG2
Glutamatergic synapse(K)	0.0101	114	1	0.2471	0.2471	GNG11

## Sheet: Coregnet
COREGNET LC	Reg1	Reg2	Support	NA	nGRN	fisherTest	adjustedPvalue		COREGNET BC	Reg1	Reg2	Support	NA	nGRN	fisherTest	adjustedPvalue
1	EPAS1	FOXF1	0.103897385809867	902061	902061	4.7193631911121e-106	5.51960303656154e-105		1	FOXM1	MYBL2	0.0641630028387454	148273	148273	1.04730174378985e-77	3.45609575450651e-76
2	EPAS1	FOSB	0.0965723091878469	838463	838463	1.02467203884384e-109	1.31255608785235e-108		2	EGR1	FOSB	0.0449599286851762	103897	103897	1.52107564351125e-30	1.36896807916013e-29
3	FOXF1	KLF4	0.095035722389294	825122	825122	5.44003240820441e-64	3.65842179451746e-63		6	EPAS1	KLF2	0.0293671674859794	67864	67864	2.88644952967556e-144	1.4287925171894e-142
4	EPAS1	KLF4	0.0948846091384356	823810	823810	1.64275599805179e-78	1.4254882692772e-77		8	FOSB	GPRASP1	0.0269408190819082	62257	62257	9.07019473854478e-27	7.48291065929944e-26
5	FOSB	KLF4	0.0942404197999823	818217	818217	4.37293657453758e-174	1.18351347318433e-172		12	NR2F1	ZBTB16	0.0244006612199682	56387	56387	7.32538319938042e-49	1.20868822789777e-47
6	KLF2	KLF4	0.0926173344866469	804125	804125	2.0726519825871e-165	5.068576211963e-164		15	FOSB	KLF2	0.0204593055459392	47279	47279	1.4157682589166e-45	2.00230082332491e-44
7	FOXF1	KLF2	0.0906285597133455	786858	786858	2.09360218032975e-138	3.51986866567939e-137		35	GPRASP1	KLF2	0.0111282282074361	25716	25716	3.10798147955514e-173	3.07690166475959e-171
8	FOSB	FOXF1	0.0887080853651654	770184	770184	1.28029302840379e-46	7.82724601455952e-46		38	EGR1	KLF2	0.00933151007408433	21564	21564	1.86243157730015e-56	3.68761452305429e-55
9	EPAS1	SOX17	0.0882721374577729	766399	766399	7.25559377441633e-134	1.08430818073222e-132		45	KLF4	ZBTB16	0.00747593990168248	17276	17276	1.08082760522057e-06	6.29423134804918e-06
10	KLF4	SOX17	0.0859819424272336	746515	746515	3.62639755316925e-263	4.87750470901264e-261		47	KLF2	ZBTB16	0.00702070207020702	16224	16224	1.46316762968185e-07	9.65690635590023e-07
11	FOXF1	SOX17	0.0843249948457942	732129	732129	4.7669939030523e-60	3.12761307297822e-59		48	EGR1	KLF4	0.00691035449698816	15969	15969	1.64781415832336e-07	1.01958501046258e-06
12	FOSB	SOX17	0.0782871451228544	679707	679707	3.20114254573643e-200	1.43517890800517e-198		57	KLF2	KLF4	0.00505564979574881	11683	11683	2.57552752515565e-58	6.37443062476024e-57
13	EPAS1	KLF2	0.0772709315463884	670884	670884	4.22415584249131e-81	4.05820686296487e-80		66	MYBL2	TAL1	0.00305900782385931	7069	7069	0.000287781730342479	0.00158279951688363
14	KLF4	NR4A3	0.07716992063099	670007	670007	1.42219372610576e-118	1.91285056161225e-117		90	EGR1	SOX17	0.000453074153569203	1047	1047	3.80152309960569e-38	3.76350786860964e-37
15	FOSB	KLF2	0.0750003167389023	651170	651170	1.75992699487009e-104	1.97258484008356e-103		91	FOSB	SOX17	0.000453074153569203	1047	1047	8.77692041239787e-11	6.2065365773385e-10
16	KLF2	SOX17	0.0726406695054151	630683	630683	5.65752003555924e-109	6.91760404347926e-108		93	KLF4	SOX17	0.000108183895312608	250	250	5.08208692403797e-41	5.59029561644177e-40
17	EPAS1	RORA	0.0720906955931829	625908	625908	4.17477577434472e-08	1.16980696176951e-07		95	KLF2	SOX17	6.40448660250641e-05	148	148	3.73169270471232e-43	4.6179697220815e-42
18	FOXF1	MEIS1	0.0701354375546375	608932	608932	1.00322051533414e-74	8.43332245702765e-74		96	SOX17	ZBTB16	6.40448660250641e-05	148	148	1.34104992648634e-13	1.02126109786267e-12
19	FOSB	NR4A3	0.0640332034511871	555951	555951	1.30555911815323e-200	7.02390805566438e-199
20	FOSB	RORA	0.0638227736422555	554124	554124	4.9485005739745e-27	2.18220763016252e-26
21	FOXF1	ID4	0.0634666439382509	551032	551032	2.22572943419155e-22	8.93613757906755e-22
22	KLF4	RORA	0.0620268064771378	538531	538531	1.48834848185344e-13	4.88250904412898e-13
23	EPAS1	NR4A3	0.0615495097457681	534387	534387	1.93072295703121e-32	9.27436563288206e-32
25	EGR1	FOSB	0.0581420902233643	504803	504803	1.35965049377742e-45	8.12768850724726e-45
26	GATA6	KLF4	0.0572117992727675	496726	496726	4.61396323026111e-14	1.57108368220283e-13
28	RORA	SOX17	0.0564396474177717	490022	490022	2.06757278581394e-44	1.20908060735642e-43
29	ID4	KLF4	0.0563136429235346	488928	488928	0.000386457578997255	0.000888522126070612
30	FOXF1	NR4A3	0.054781087347375	475622	475622	4.79531387169025e-08	1.31626472600477e-07
31	NR4A3	SOX17	0.0545879342058434	473945	473945	1.29463493972563e-142	2.32171199190796e-141
34	GATA6	SOX17	0.0508069931342524	441118	441118	4.98074053167492e-13	1.59502286073875e-12
38	KLF2	RORA	0.0499090671405849	433322	433322	0.00363910508201685	0.00802392841854535
40	EPAS1	MEIS1	0.0490693059271639	426031	426031	0.000671060914868942	0.00152979140762496
45	FOSB	TAL1	0.046043124865386	399757	399757	4.36415452158509e-05	0.000105761942910486
46	GATA6	KLF2	0.0453978989268886	394155	394155	3.99212012457128e-06	1.00362646122399e-05
47	NR4A3	RORA	0.0452880193222248	393201	393201	7.37498376905107e-27	3.14900100615038e-26
50	FOXF1	TAL1	0.0449232512845202	390034	390034	7.19809361923062e-05	0.000171352848103809
51	ID4	KLF2	0.0445306102234103	386625	386625	1.9089652509551e-06	4.93761204333579e-06
53	ID4	SOX17	0.0431864854996931	374955	374955	0.0003434901700069	0.00079654185975738
54	FOSB	GATA6	0.0431745070102957	374851	374851	4.00350577550517e-08	1.13362426695883e-07
56	KLF2	NR4A3	0.0424807912252958	368828	368828	1.58696302919882e-36	8.05458594065061e-36
59	MEIS1	RORA	0.0404329302494866	351048	351048	7.83836414102392e-96	8.43407981574174e-95
61	KLF2	MEIS1	0.0392434892878903	340721	340721	5.47537524047708e-10	1.63652882187593e-09
63	GPRASP1	RORA	0.0388926577618884	337675	337675	1.50732817063685e-68	1.12630910528142e-67
64	EGR1	SOX17	0.038747764111294	336417	336417	0.00193857497540881	0.0043097245321072
69	ID4	RORA	0.0356196507118563	309258	309258	3.37860637224344e-09	9.77252810896221e-09
70	FOXM1	MYBL2	0.0350249878199495	304095	304095	8.51560392190762e-39	4.67489276529214e-38
75	GPRASP1	ID4	0.0323704854628362	281048	281048	0.00111342167942225	0.00251689438457636
78	EGR1	RORA	0.0313269747518783	271988	271988	1.81056868756007e-17	6.64452152646486e-17
79	GPRASP1	MEIS1	0.0311156235206854	270153	270153	3.20775913177782e-72	2.53790354837716e-71
81	EGR1	TAL1	0.0300770654543821	261136	261136	2.04571987861961e-70	1.57228184956764e-69
82	ID4	MEIS1	0.0300081891403476	260538	260538	3.96943468586677e-64	2.73789212948247e-63
83	GATA6	ID4	0.0291679672157959	253243	253243	2.59238196572568e-20	9.96215355400297e-20
84	EGR1	NR4A3	0.0284186205617681	246737	246737	3.33342311851059e-22	1.31866296894022e-21
90	GATA6	NR4A3	0.0233268411456504	202529	202529	6.22557785830661e-11	1.92492005044193e-10
97	FOXM1	SOX4	0.0204718142689148	177741	177741	1.07179153666857e-94	1.10889201293787e-93
104	BZW2	FOXM1	0.0177911665551362	154467	154467	1.69978443854699e-242	1.5241400465638e-240
105	FOSB	ID2	0.0177682461763856	154268	154268	2.24681616433996e-14	7.74863523342885e-14
109	EPAS1	PKNOX2	0.0176117195697419	152909	152909	1.26907736930007e-36	6.56503485272539e-36
116	FOXF1	PKNOX2	0.0152437795359026	132350	132350	1.00218265459117e-34	4.99235433490784e-34
117	ID2	KLF2	0.0151273347976269	131339	131339	0.000206756626317077	0.000483630717211249
120	ID2	SOX17	0.0145780519520907	126570	126570	2.50720887424743e-05	6.13126533793235e-05
122	FOSB	PKNOX2	0.0134832871278462	117065	117065	1.33021691226115e-72	1.08432833150984e-71
124	KLF4	PKNOX2	0.0133487594776918	115897	115897	3.56291339512424e-11	1.11444616661444e-10
126	PKNOX2	TAL1	0.0120337747329891	104480	104480	1.16068403919141e-287	3.12224006542489e-285
127	GATA6	ID2	0.0116100356705593	100801	100801	2.2389649913576e-09	6.54653894212169e-09
129	HOXC6	SOX4	0.0113768006606598	98776	98776	2.81938128345859e-49	1.76375247732642e-48
130	EGR1	PKNOX2	0.0113006681463172	98115	98115	1.29683772758277e-163	2.68345652861358e-162
131	PKNOX2	SOX17	0.010923345730302	94839	94839	3.38864168315671e-31	1.59920107503361e-30
133	FOSB	RFX2	0.00961308327468865	83463	83463	0.00121620120217839	0.00272631769488321
135	KLF2	PKNOX2	0.0093727072422638	81376	81376	1.27064751658239e-14	4.43901535013849e-14
137	ID2	TAL1	0.00915628818863357	79497	79497	1.1362253560022e-43	6.5030770375445e-43
138	ETV4	FOXM1	0.00906575845145775	78711	78711	1.00245315105592e-32	4.90290722970986e-32
139	EGR1	ID2	0.00893180669021668	77548	77548	4.61040286187192e-79	4.13399456614515e-78
141	BZW2	ETV4	0.00856174047450943	74335	74335	4.3996783389752e-174	1.18351347318433e-172
144	FOXM1	HOXC6	0.00816875388005155	70923	70923	2.91990247342328e-06	7.48051205096059e-06
145	NR4A3	PKNOX2	0.00804424669698914	69842	69842	8.26301830359599e-37	4.35833710523004e-36
148	ID2	NR4A3	0.00768638932624453	66735	66735	9.72413867214516e-10	2.8744981349528e-09
151	GPRASP1	PKNOX2	0.00688383053662481	59767	59767	3.42131067299413e-08	9.79077203229171e-08
153	ETV4	HOXC6	0.00648427880855495	56298	56298	4.79210736925872e-08	1.31626472600477e-07
155	BZW2	TFAP2C	0.00636967691480184	55303	55303	8.25885677665168e-189	3.173760675599e-187
156	HOXC6	TFAP2C	0.00630241308972465	54719	54719	3.05761198173946e-10	9.24154632683049e-10
157	MEIS1	PKNOX2	0.00629607831167799	54664	54664	3.34634958403882e-28	1.50028006351074e-27
159	NR4A3	RFX2	0.00624609115400076	54230	54230	2.7118358594377e-13	8.78896200227399e-13
161	SOX4	TCF3	0.00593580220749738	51536	51536	1.41822370777732e-29	6.57762374813965e-29
163	SOX4	TFAP2C	0.00587003569359485	50965	50965	1.47079978757339e-157	2.82603673469459e-156
166	PKNOX2	ZBTB16	0.00562251863864468	48816	48816	1.10852339177047e-24	4.58758142132704e-24
167	EGR1	RFX2	0.00552657554568354	47983	47983	4.51683753051109e-80	4.18975619209477e-79
168	FOXM1	TFAP2C	0.00539389074005181	46831	46831	0.00010553062903113	0.000249015256222579
169	RFX2	TAL1	0.00533918129328525	46356	46356	2.19265107152114e-41	1.22879820466497e-40
171	BZW2	SOX4	0.00510744359456038	44344	44344	3.73219847271249e-134	5.90565523035095e-133
172	BZW2	HOXC6	0.00509166423833508	44207	44207	5.18326149801403e-18	1.93652408745246e-17
175	ID2	ZBTB16	0.00504639936974717	43814	43814	7.0935701433432e-21	2.76546430225988e-20
177	GATA6	PKNOX2	0.00474140860124645	41166	41166	5.73867260607579e-08	1.54370293103439e-07
184	HOXC6	SOX12	0.00372507984699783	32342	32342	5.68920068616008e-06	1.41703239312691e-05
185	ETV4	SOX12	0.00363673848769268	31575	31575	5.04544621395135e-08	1.37093437530597e-07
187	EPAS1	NR2F1	0.0035412561058622	30746	30746	9.93470655830141e-11	3.03685916384441e-10
189	FOXM1	TCF3	0.00309275382015911	26852	26852	3.6676000467976e-12	1.16068754422183e-11
191	FOXF1	NR2F1	0.00293565132460209	25488	25488	1.05788684334231e-15	3.74436264288265e-15
199	FOSB	NR2F1	0.00223617665046883	19415	19415	8.74623803641696e-14	2.9409225397452e-13
201	ID2	MNDA	0.00220346616019156	19131	19131	3.22612429613686e-19	1.22229216290256e-18
202	HLF	ZBTB16	0.00220312062684356	19128	19128	0.00392386942305437	0.00858147052684249
203	ETV4	TFAP2C	0.00218135202591961	18939	18939	8.91683535659097e-83	8.88381004045544e-82
205	KLF2	NR2F1	0.00206076088746785	17892	17892	2.15247186548725e-07	5.73282110708979e-07
207	ID2	PKNOX2	0.00195617946080673	16984	16984	2.4659461445155e-221	1.65834878218667e-219
208	NR2F1	SOX17	0.00189709325829885	16471	16471	8.52178731535076e-06	2.10308329158656e-05
212	ID4	NR2F1	0.00177247089745376	15389	15389	2.02245561290201e-29	9.22102643848545e-29
213	SOX12	TFAP2C	0.00164923067000068	14319	14319	1.69564731672498e-06	4.42843813785456e-06
214	NR2F1	TAL1	0.00162320049111807	14093	14093	1.54597253924682e-38	8.31733226114791e-38
217	MEIS1	NR2F1	0.00149961473031698	13020	13020	1.63670118678391e-68	1.18992599795911e-67
221	PKNOX2	RFX2	0.000949064929171423	8240	8240	2.85257759909484e-182	9.59179217695641e-181
223	NR2F1	NR4A3	0.000762361743469132	6619	6619	7.02671617541261e-05	0.000168766665284464
225	GATA6	NR2F1	0.000644419694018703	5595	5595	3.28051724582277e-06	8.32508621817288e-06
226	HLF	ID2	0.000625876071009407	5434	5434	4.94509645294311e-07	1.30414798611931e-06
227	NR2F1	ZBTB16	0.000618619870701421	5371	5371	5.47014151240998e-27	2.37333559167465e-26
228	ID2	RFX2	0.000612169914872101	5315	5315	6.75907840298582e-56	4.32902878667425e-55
229	NR2F1	RORA	0.000592704869601473	5146	5146	1.06385368456307e-13	3.53304495243786e-13
230	GPRASP1	NR2F1	0.000585563847076154	5084	5084	1.8278609403658e-17	6.64452152646486e-17
235	EGR1	NR2F1	0.000391374105500545	3398	3398	2.90020282663201e-24	1.1820523641879e-23
237	HLF	PKNOX2	0.000281494500836767	2444	2444	4.3928827861336e-16	1.57558062595992e-15
238	HLF	NR2F1	0.00027135885596212	2356	2356	1.86207884237289e-127	2.63631162420161e-126
242	NR2F1	PKNOX2	0.000233926076595529	2031	2031	2.41408996643092e-165	5.41158500808265e-164
254	ID2	NR2F1	4.91809131985677e-05	427	427	3.40980614705845e-67	2.41378382515454e-66
257	NR2F1	RFX2	2.36114454466191e-05	205	205	1.38515964663254e-25	5.82199913975238e-25
